# Supplementary material for: CNVs with adaptive potential in Rangifer tarandus: genome architecture and new annotated assembly
Source: Life Sci Alliance. 2021 Dec 15;5(3):e202101207. doi: 10.26508/lsa.202101207 (PMC8711850; doi:10.26508/lsa.202101207)
Supplement: Supplementary file 2 [file LSA-2021-01207_TableS1.xlsx]

## Sheet: supplementary_Table_2
#term	term_size	term_size_in_genome	list1_positives	list1_negatives	list1_percentage	list2_positives	list2_negatives	list2_percentage	list1_positive_ids	list2_positive_ids	odds_ratio_log	pvalue	adj_pvalue
leukocyte activation(GO:0045321)	587	1406	109	16340	0.66	478	41493	1.14	BCL10,PAWR,FYN,SNCA,FCER1G,SOCS5,IL7,ID2,FKBP1B,PRKCE,PRKCQ,PRNP,YES1,IRF1,XRCC4,PDCD1LG2,ZBTB1,AP1G1,MERTK,CHD7,ITK,CD276,CD274,MSH6,MSH2,VNN1,IL15RA,ADORA2B,APLF,NDFIP1,KCTD7,FOXJ1,IL2RA,TESPA1,PLS1,RPS6,MZB1,LGALS1,ADAM17,CLU,CR2,SP3,ABL1,SKAP2,DCSTAMP,DPP4,PTK2B,POLM,C10orf54,IFNAR1,IGF1,CDKN2A,PELI1,GPR183,RC3H2,RC3H1,IFNW1,CTNNB1,IFNA5,CCL21,CCL19,PI4K2A,MAPKAP1,PPP2R3C,MYD88,BLNK,NCOR1,HSP…	SART1,ZAP70,TICAM1,NLRC3,BCL10,FADD,HDAC5,HDAC4,HDAC9,PAWR,IMPDH1,SLA2,IL6ST,NR1H3,SASH3,PDPK1,ZFP36L1,ZFP36L2,FYN,TNIP2,HLX,RPL22,PGLYRP2,VAV3,VAV1,XCL1,TSPAN32,SNCA,FCER1G,FCER1A,TBX21,AP3B1,HPRT1,AP3D1,ITPKB,PAG1,SATB1,SOCS6,SOCS5,PTPN6,PTPN2,PAK2,PAK1,PTPRC,PTPRE,PATZ1,ELF4,HYAL2,IL12A,PPP3CB,PPP3CA,IL7,TXLNA,CXCL12,VAMP7,TNFSF9,TNFSF8,ID2,TPD52,KLF6,FUT7,FKBP1A,FKBP1B,BCL3,BCL6,SOD1,ZC3H8,MT…	-0.546354	7.79371e-08	0.000143988
negative regulation of cellular protein metabolic process(GO:0032269)	565	1354	104	16345	0.63	461	41510	1.1	LRRK2,LRRK1,ANAPC1,ANAPC4,ITGB1BP1,PTPRJ,XDH,UFL1,SNCA,NR2F2,SOCS5,ILK,RIC1,BDKRB1,BDKRB2,MBIP,SNX6,PRNP,DEPTOR,LATS2,ENPP1,CDC23,EDNRB,PSMA2,PSMA6,PSMA3,PSMA7,PSMB7,PSMC6,PSMD2,PSMD7,PSME1,PSME2,CYTB,ACER2,PKIB,PLAT,KCTD7,IBTK,TAF7,ATRAID,SFN,SET,CAPRIN2,CALM1,TP73,ABL1,EIF3E,ENG,EIF2AK3,PAIP2,EIF4EBP3,CDKN2A,CDKN2B,CDKN2D,CDKN1B,WNK1,UBXN1,OPHN1,CTNNB1,MYADM,IREB2,LIMK1,BMP7,TOB1,ANAPC10,SERPIN…	ERRFI1,ATG5,ATG7,ENC1,LRRK2,LRRK1,HDAC6,PAX6,PRMT3,GBA,ADARB1,NELL1,ANAPC1,ANAPC2,ANAPC5,ANAPC4,ANAPC7,NR1H2,CPEB2,CPEB3,PDPK1,PARD3,JARID2,TESC,ITGB1BP1,PBLD,PARK7,PECAM1,PTPRJ,HMG20B,HEXIM2,HEXIM1,MAS1,XDH,PPM1F,UFL1,PPM1E,SNCA,ADAR,NFKB1,FAM129A,NR2F2,SOCS4,SOCS5,TFAP4,WT1,PTPN6,PTPN3,PTPN2,PTPN1,MEN1,PAK2,BUB1B,PTPRC,ILK,CRTAP,PRKRIP1,F2,RIC1,HYAL2,IDE,CIB1,PAIP2B,GTPBP4,MTF2,BDKRB1,BDKRB2,BC…	-0.556995	9.48363e-08	0.000143988
coagulation(GO:0050817)	563	1444	104	16345	0.63	459	41512	1.09	TFPI,SLC3A2,HDAC2,JMJD1C,FYN,FBLN5,PPIA,PTPRJ,FCER1G,DOCK11,FAM46A,ITPR2,MAFF,SCARA5,ILK,TF,KLC1,PRKCH,PRKCE,PRKCQ,YES1,IRF1,IRF2,MERTK,JAK2,TC2N,ABCC4,USF1,TGFB3,TGFB2,APOB,PLAT,PLEK,TTN,PLS1,RCOR1,DAGLA,TEK,TEC,AKAP10,CALM1,CLU,SRGN,CRK,ABL1,F11R,MFN2,COL1A2,IGF1,GNA14,STXBP1,STXBP5,ZFPM2,COL3A1,PDGFB,IFNA5,DOCK9,DOCK6,CAPZB,CENPE,KIF3C,SERPINA1,CLIC1,SERPINC1,RAF1,C4BPB,GATA6,GATA4,AKAP1,ANO6,…	TFPI,SLC3A2,HDAC2,HDAC1,TBXA2R,JMJD1C,PPBP,PDPK1,SLC16A3,FYN,FBLN5,SLC16A1,FN1,PPIA,PTPRJ,HMG20B,PROCR,HGF,CAPZA2,CAPZA1,VAV3,VAV2,VAV1,PIP5K1C,CABLES1,KIF9,TSPAN32,SH2B3,SH2B2,SH2B1,HBB,FCER1G,DOCK11,AP3B1,FAM46A,ITPR3,ITPR1,ITPR2,MAFG,MAFF,PTPN6,NFE2,MAFK,HIST2H3C,PTPN1,SCARA5,ILK,F8,F9,F7,F5,F3,F2,PABPC4,NBEAL2,PRCP,PPIL2,OLR1,PRKG2,PRKG1,TF,KLC2,KLC1,SOD1,PROZ,PRKCA,PRKCH,PRKCG,PRKCE,PRKCD,PR…	-0.552599	1.17366e-07	0.000143988
hemostasis(GO:0007599)	564	1451	104	16345	0.63	460	41511	1.1	TFPI,SLC3A2,HDAC2,JMJD1C,FYN,FBLN5,PPIA,PTPRJ,FCER1G,DOCK11,FAM46A,ITPR2,MAFF,SCARA5,ILK,TF,KLC1,PRKCH,PRKCE,PRKCQ,YES1,IRF1,IRF2,MERTK,JAK2,TC2N,ABCC4,USF1,TGFB3,TGFB2,APOB,PLAT,PLEK,TTN,PLS1,RCOR1,DAGLA,TEK,TEC,AKAP10,CALM1,CLU,SRGN,CRK,ABL1,F11R,MFN2,COL1A2,IGF1,GNA14,STXBP1,STXBP5,ZFPM2,COL3A1,PDGFB,IFNA5,DOCK9,DOCK6,CAPZB,CENPE,KIF3C,SERPINA1,CLIC1,SERPINC1,RAF1,C4BPB,GATA6,GATA4,AKAP1,ANO6,…	TFPI,SLC3A2,HDAC2,HDAC1,TBXA2R,JMJD1C,PPBP,PDPK1,AVPR2,SLC16A3,FYN,FBLN5,SLC16A1,FN1,PPIA,PTPRJ,HMG20B,PROCR,HGF,CAPZA2,CAPZA1,VAV3,VAV2,VAV1,PIP5K1C,CABLES1,KIF9,TSPAN32,SH2B3,SH2B2,SH2B1,HBB,FCER1G,DOCK11,AP3B1,FAM46A,ITPR3,ITPR1,ITPR2,MAFG,MAFF,PTPN6,NFE2,MAFK,HIST2H3C,PTPN1,SCARA5,GPI,ILK,F8,F9,F7,F5,F3,F2,PABPC4,NBEAL2,PRCP,PPIL2,OLR1,PRKG2,PRKG1,TF,KLC2,KLC1,SOD1,PROZ,PRKCA,PRKCH,PRKCG,PRKC…	-0.554799	9.39355e-08	0.000143988
blood coagulation(GO:0007596)	558	1437	103	16346	0.63	455	41516	1.08	TFPI,SLC3A2,HDAC2,JMJD1C,FYN,FBLN5,PPIA,PTPRJ,FCER1G,DOCK11,FAM46A,ITPR2,MAFF,SCARA5,ILK,TF,KLC1,PRKCH,PRKCE,PRKCQ,YES1,IRF1,IRF2,MERTK,JAK2,TC2N,ABCC4,USF1,TGFB3,TGFB2,APOB,PLAT,PLEK,TTN,PLS1,RCOR1,DAGLA,TEK,TEC,AKAP10,CALM1,CLU,SRGN,CRK,ABL1,F11R,MFN2,COL1A2,IGF1,GNA14,STXBP1,STXBP5,ZFPM2,COL3A1,PDGFB,IFNA5,DOCK9,DOCK6,CAPZB,CENPE,KIF3C,SERPINA1,CLIC1,SERPINC1,RAF1,C4BPB,GATA6,GATA4,AKAP1,ANO6,…	TFPI,SLC3A2,HDAC2,HDAC1,TBXA2R,JMJD1C,PPBP,PDPK1,SLC16A3,FYN,FBLN5,SLC16A1,FN1,PPIA,PTPRJ,HMG20B,PROCR,HGF,CAPZA2,CAPZA1,VAV3,VAV2,VAV1,PIP5K1C,CABLES1,KIF9,TSPAN32,SH2B3,SH2B2,SH2B1,HBB,FCER1G,DOCK11,AP3B1,FAM46A,ITPR3,ITPR1,ITPR2,MAFG,MAFF,PTPN6,NFE2,MAFK,HIST2H3C,PTPN1,SCARA5,ILK,F8,F9,F7,F5,F3,F2,PABPC4,NBEAL2,PRCP,PPIL2,OLR1,PRKG2,PRKG1,TF,KLC2,KLC1,SOD1,PROZ,PRKCA,PRKCH,PRKCG,PRKCE,PRKCD,PR…	-0.553473	1.33487e-07	0.000143988
regulation of response to external stimulus(GO:0032101)	564	1340	102	16347	0.62	462	41509	1.1	AP2M1,FYN,LARP1,PTPRJ,ACP5,PPM1B,FCER1G,FAM46A,SCARA5,AGTR1,LZTS1,C2,AGER,TF,FKBP1B,PRKD1,PRKCQ,AP1G1,BBS4,AP1M2,JAK2,TC2N,EDNRB,ZCCHC11,PSMA6,CD276,SETD6,C4A,USF1,USP14,ELMO1,FNTB,ADORA2B,BMPR2,PLAT,NDFIP1,PLEK,KCTD7,TNR,IL2RA,TEK,TEC,CFH,CFB,ADAM17,CALM1,TM9SF1,TNFRSF1B,MAPK7,ARF1,IL17RA,IER3,IFT88,RNF5,LY96,FAP,PTK2B,STK24,STXBP5,PDGFB,CTNNA2,CCL21,CCL19,ELMOD2,PPP2R3C,SERPINC1,C4BPB,C4BPA,MYD…	AP2S1,ATG7,AP2M1,GBA,IL6ST,C5AR2,NR1H3,SASH1,NR1D2,AP2A2,AP2A1,FYN,LARP1,TNIP1,NLRP3,NLRP1,CAMK1D,PARK7,PTPRJ,PTPRO,ACP5,CLOCK,FFAR4,FFAR3,NLRX1,MAS1,PGLYRP2,MAVS,TLR10,VAV2,XCL1,PPM1F,PPM1B,TSPAN32,HCK,ACE2,FCER1G,FCER1A,NFKB1,MED1,FAM46A,MEFV,DSCAM,NRBP2,PTPN2,MUL1,SCARA5,PAK2,SCARF1,AGTR1,F7,F3,F2,MCPH1,OPRM1,LZTS1,HYAL2,C7,C9,C3,C6,C5,C2,CXCL12,CXCL10,MTUS1,KLK8,PRKG1,AGER,EPHA4,GHSR,KLF4,MB2…	-0.578726	3.18012e-08	0.000143988
sulfur compound metabolic process(GO:0006790)	320	804	50	16399	0.3	270	41701	0.64	TPST1,ACOT12,HS6ST1,SULF2,SULF1,SNCA,TDO2,MTRR,VCAN,MTAP,SLC5A6,GGCT,MSRA,ELOVL4,ELOVL2,ENPP1,MCEE,KERA,DLST,HEXA,DCN,SLC19A3,CTH,GLRX2,MTHFD1,KYNU,AASS,IGF1,SDC1,GSTA4,CTNNB1,B4GALT3,HSD17B4,B3GAT3,CPS1,HPSE,PCYOX1,NCAN,LUM,PDP2,OGDH,ACSM2A,MVK,MUT,MTR,DGAT2,DNMT3A,XYLT1,ANGPT1,PCCA	EGFLAM,GHR,ADI1,TPST1,SLC25A10,ACOT12,HS6ST2,HS6ST1,CSGALNACT1,SULF2,CSGALNACT2,SULF1,ACLY,TECR,SNCA,NFS1,GNS,GSS,GSR,TDO2,HAGHL,SULT4A1,HYAL1,MTRR,VCAN,ACSL1,ACSL4,ACSL6,ACSL5,IDS,PC,G6PD,MTAP,SOD1,SOD2,ACSS2,ACSS1,CHPF,BCAN,SLC5A6,GGCT,DLAT,MSRA,IMPAD1,ELOVL1,ST3GAL1,ST3GAL3,ST3GAL2,ELOVL5,ELOVL4,ST3GAL4,ELOVL2,ST3GAL6,ELOVL7,ELOVL6,ENOPH1,PCYOX1L,ENPP1,GALNS,GGT5,GGT7,MCEE,SULT2A1,MGST1,MGST2,…	-0.753094	1.84197e-07	0.000170303
regulation of nucleoside metabolic process(GO:0009118)	597	1757	114	16335	0.69	483	41488	1.15	RALGPS1,LRRK2,SPATA13,RAB3GAP1,ITGB1BP1,RANBP10,ARHGEF4,ARHGEF6,SH3BGRL3,SNCA,DOCK11,DIS3,PGAM5,RIC1,DNMBP,FAM13B,EPHB3,EPHA5,RIN3,CHN1,CHN2,RABGAP1L,PLEKHG3,PSD2,RASGRF2,RAB3IP,FBXO8,KCTD7,FOXJ1,SYDE2,ARAP3,ARAP2,PLS1,SRGAP3,TBC1D9,TBC1D4,TBC1D7,RAPGEF2,GAPVD1,ASAP2,AKAP13,TBC1D15,LLGL1,TBC1D2B,ST5,GARNL3,ARHGAP6,ARHGAP5,CRK,DENND5B,DENND4C,PTK2B,DENND1A,DENND3,TPM1,RGS18,SMAP1,AMOT,PREX2,SH2D3C…	ARHGEF40,RALGPS2,RALGPS1,ARHGEF26,ARHGEF25,ARHGEF28,ARHGEF33,ARHGEF39,ARHGEF37,ERRFI1,ARHGEF18,ARHGEF19,ARHGEF16,ARHGEF17,ARHGEF15,ARHGEF12,ARHGEF10,ARHGEF11,KNDC1,NET1,PTPRN2,LRRK2,SPATA13,ARHGDIG,ARHGDIA,TBXA2R,USP6NL,RAB3GAP2,RAB3GAP1,ACAP3,ACAP1,ACAP2,RABEP2,RABEP1,CPEB2,SLC25A23,TAGAP,PPIF,RALBP1,ITGB1BP1,PARK7,PECAM1,RANBP10,ARHGEF4,ARHGEF3,ARHGEF2,ARHGEF1,ARHGEF7,ARHGEF6,ARHGEF5,ARHGEF9,VA…	-0.511724	3.46593e-07	0.000280394
small molecule biosynthetic process(GO:0044283)	471	1143	85	16364	0.52	386	41585	0.92	ACADM,ACADL,UGP2,ACAT1,NR1H4,DHFR,ASNSD1,SNCA,MTRR,VCAN,ACSM3,ACSM1,FDFT1,C14orf1,MTAP,GGCT,ELOVL4,ELOVL2,CYB5R2,PSPH,ACER2,GART,HACD4,APOB,PLEK,PLS1,PLTP,SHMT1,APOA2,DCN,FPGS,HMGCLL1,ALDH7A1,CTH,SCD5,HNF1A,MTHFD1,PTK2B,KYNU,LPIN1,ASNS,CYP46A1,PSAT1,MMAB,MMAA,CHPT1,SREBF1,COQ5,COQ4,COQ3,COQ2,SCP2,PTGS1,BMP5,DHCR24,GMPS,SLC27A2,SLC27A5,HSD17B4,GOT2,SCD,CPS1,ASL,ALOX12,LCAT,PEMT,SLC44A1,SLC44A2,SLC…	ACAA2,CFTR,DHCR7,GLUD2,GLUD1,ISYNA1,ACADM,ACADL,UGP2,ATIC,GBA,ADI1,ABCB11,ACAT1,NR1H2,NR1H4,NR1H3,DHFR,CYP39A1,NR1D1,FA2H,ASNSD1,GFI1,PARK7,MAS1,TECR,ACHE,ACOX2,IPMK,ACADVL,SNCA,FCER1A,NFKB1,MECR,PHOSPHO1,UBIAD1,GLS,GSS,HAGHL,BDH1,GPT,SGMS2,SGMS1,CYP2R1,AASDHPPT,DECR2,MTRR,VCAN,ACSL3,ACSM3,ACSM1,NDUFAB1,FDFT1,ACSF3,DHRS9,CYP3A4,C14orf1,CHKA,CHKB,G6PD,CYP27A1,MTAP,PLA2G5,CYP27B1,SOD1,ACSS2,ACSS1,H…	-0.58053	4.07882e-07	0.000293312
regulation of locomotion(GO:0040012)	608	1346	118	16331	0.72	490	41481	1.17	LRRK2,SPATA13,ITGB1BP1,CAMK2D,SULF1,PTPRJ,PTPRK,SH3BGRL3,SNCA,NR2F2,CYR61,ILK,BDKRB1,AGER,TF,PLXND1,CHRD,PRKCE,PRKD1,SYNE2,UNC5C,BBS4,JAK2,ENPP2,TBX5,ELP3,USP14,CSNK2B,TGFB2,BMPR2,HACE1,KCTD7,BMPER,ARAP3,BMP10,TEK,AQP1,GAB1,RAPGEF2,ADAM17,HOXA7,ARHGAP5,MARVELD3,TFAP2A,ABL1,GDF2,SCAI,DIAPH1,PTK2B,STK24,ENG,PODN,EVL,ACVR1C,TPM1,IGF1,AMOT,HIF1A,COL3A1,PDGFB,MMP9,CTNNA1,MYADM,CCL20,CCL21,CCL19,RPS6KB…	AMOTL1,ARHGEF39,NR2E1,NET1,FADD,LRRK2,SPATA13,IFITM1,IFITM2,IFITM3,ARHGDIA,HDAC5,HDAC9,HDAC7,HDAC6,PAX6,NEXN,ADARB1,FAM110C,C5AR2,SASH1,PDPK1,EMP2,SSX2IP,PHPT1,ITGB1BP1,CAMK1D,PBLD,CAMK2D,SULF1,PECAM1,PTPRJ,PTPRK,PTPRM,PTPRG,PTPRR,PTPRU,PTPRO,HGF,ARHGEF7,ANGPTL3,XCL1,PPM1F,SH3BGRL3,SNCA,CCSAP,DOCK10,NR2F2,CYR61,MIEN1,DSCAM,SCARB1,PARD6B,PTPN2,BVES,PLVAP,PTPRC,PLET1,ILK,F7,F3,HYAL1,HYAL2,C5,LMNA,P…	-0.49155	7.12799e-07	0.000329842
regulation of purine nucleotide catabolic process(GO:0033121)	588	1724	113	16336	0.69	475	41496	1.13	RALGPS1,LRRK2,SPATA13,RAB3GAP1,ITGB1BP1,RANBP10,ARHGEF4,ARHGEF6,SH3BGRL3,DOCK11,DIS3,PGAM5,RIC1,DNMBP,FAM13B,EPHB3,EPHA5,RIN3,CHN1,CHN2,RABGAP1L,PLEKHG3,PSD2,RASGRF2,RAB3IP,FBXO8,KCTD7,FOXJ1,SYDE2,ARAP3,ARAP2,PLS1,SRGAP3,TBC1D9,TBC1D4,TBC1D7,RAPGEF2,GAPVD1,ASAP2,AKAP13,TBC1D15,LLGL1,TBC1D2B,ST5,GARNL3,ARHGAP6,ARHGAP5,CRK,MAPK7,DENND5B,DENND4C,PTK2B,DENND1A,DENND3,TPM1,RGS18,SMAP1,AMOT,PREX2,SH2D3…	ARHGEF40,RALGPS2,RALGPS1,ARHGEF26,ARHGEF25,ARHGEF28,ARHGEF33,ARHGEF39,ARHGEF37,ERRFI1,ARHGEF18,ARHGEF19,ARHGEF16,ARHGEF17,ARHGEF15,ARHGEF12,ARHGEF10,ARHGEF11,KNDC1,NET1,PTPRN2,LRRK2,SPATA13,ARHGDIG,ARHGDIA,TBXA2R,USP6NL,RAB3GAP2,RAB3GAP1,ACAP3,ACAP1,ACAP2,RABEP2,RABEP1,CPEB2,TAGAP,PPIF,RALBP1,ITGB1BP1,PECAM1,RANBP10,ARHGEF4,ARHGEF3,ARHGEF2,ARHGEF1,ARHGEF7,ARHGEF6,ARHGEF5,ARHGEF9,VAV3,VAV2,VAV1,PI…	-0.503701	5.91826e-07	0.000329842
regulation of nucleotide catabolic process(GO:0030811)	589	1726	113	16336	0.69	476	41495	1.13	RALGPS1,LRRK2,SPATA13,RAB3GAP1,ITGB1BP1,RANBP10,ARHGEF4,ARHGEF6,SH3BGRL3,DOCK11,DIS3,PGAM5,RIC1,DNMBP,FAM13B,EPHB3,EPHA5,RIN3,CHN1,CHN2,RABGAP1L,PLEKHG3,PSD2,RASGRF2,RAB3IP,FBXO8,KCTD7,FOXJ1,SYDE2,ARAP3,ARAP2,PLS1,SRGAP3,TBC1D9,TBC1D4,TBC1D7,RAPGEF2,GAPVD1,ASAP2,AKAP13,TBC1D15,LLGL1,TBC1D2B,ST5,GARNL3,ARHGAP6,ARHGAP5,CRK,MAPK7,DENND5B,DENND4C,PTK2B,DENND1A,DENND3,TPM1,RGS18,SMAP1,AMOT,PREX2,SH2D3…	ARHGEF40,RALGPS2,RALGPS1,ARHGEF26,ARHGEF25,ARHGEF28,ARHGEF33,ARHGEF39,ARHGEF37,ERRFI1,ARHGEF18,ARHGEF19,ARHGEF16,ARHGEF17,ARHGEF15,ARHGEF12,ARHGEF10,ARHGEF11,KNDC1,NET1,PTPRN2,LRRK2,SPATA13,ARHGDIG,ARHGDIA,TBXA2R,USP6NL,RAB3GAP2,RAB3GAP1,ACAP3,ACAP1,ACAP2,RABEP2,RABEP1,CPEB2,TAGAP,PPIF,RALBP1,ITGB1BP1,PECAM1,RANBP10,ARHGEF4,ARHGEF3,ARHGEF2,ARHGEF1,ARHGEF7,ARHGEF6,ARHGEF5,ARHGEF9,VAV3,VAV2,VAV1,PI…	-0.505828	5.96544e-07	0.000329842
regulation of MAPK cascade(GO:0043408)	559	1247	106	16343	0.64	453	41518	1.08	FRS2,LRRK2,HDAC3,ADRA1B,ADRA1A,ITGB1BP1,CAMK2D,PTPRJ,XDH,WWC1,CYR61,ILK,AR,MAPKAPK5,MAPKAPK2,NEK10,EPHA7,MBIP,PRKCE,C3orf33,JAK2,ROS1,MID1,GRIK2,TGFB3,TGFB2,ADORA2B,FBXW7,FOXO1,BMPER,TEK,DCC,TAB1,GAB1,RAPGEF2,ANKRD6,ST5,CRK,TP73,ABL1,TPD52L1,GRM4,PTK2B,TAOK1,IGF1,PELI2,GPR183,PDGFB,CTNNB1,GNG3,NOD1,CCL21,CCL19,GPR37,KIDINS220,KITLG,CHRNA7,PXN,BMP7,TNXB,FGF9,SPRY4,SPRY2,RAF1,MYD88,NCOR1,ERBB4,ZNF6…	KISS1R,GHR,FRS2,LRRK2,HDAC3,ADRA1B,ADRA1A,GBA,C5AR2,C5AR1,VRK2,VRK3,MDFI,SASH1,NENF,TNIP1,ITGB1BP1,CAMK2D,PTPRJ,PTPRR,MST1R,HGF,FFAR4,XDH,WWC1,FCER1A,COPS5,CYR61,MADD,AXIN1,PTPN6,PTPN2,MUL1,PTPN1,MEN1,PAK3,PAK1,PTPRC,ILK,OPRM1,HYAL2,AR,C5,LMO3,CIB1,ABCA7,MAPKAPK5,MAPKAPK3,MAPKAPK2,NEK10,ID1,VANGL2,EPHB1,EPHA2,EPHA4,EPHA7,EPHA8,KLF4,SOD1,MBIP,IRAK3,SORL1,IRAK2,PRKCA,IRAK1,PRKCE,PRKCD,PRKD2,PRKCZ,I…	-0.520126	6.29128e-07	0.000329842
leukocyte migration(GO:0050900)	289	658	45	16404	0.27	244	41727	0.58	SLC3A2,FYN,PPIA,PTPRJ,FCER1G,BDKRB1,YES1,MERTK,EDNRB,TGFB2,MYO1G,APOB,KCTD7,FOXJ1,TEK,ADAM17,HOXA7,F11R,ITGA9,PTK2B,COL1A2,PDGFB,MMP9,CCL20,CCL21,CCL19,BMP5,ROCK1,ANO6,THBS4,AIF1,IL16,IL10,CXCR4,FLT1,SLIT2,LAT2,RIPK3,PIK3CB,MSN,GRB14,ANGPT1,SLC7A6,PDE4D,CXADR	ZAP70,SLC3A2,FADD,C5AR2,C5AR1,PPBP,SLC16A3,FYN,SLC16A1,FN1,PPIA,CAMK1D,PECAM1,PTPRJ,PTPRO,ARHGEF5,VAV3,VAV1,XCL1,PIP5K1C,HCK,FCER1G,TBX21,PTPN6,PLVAP,F7,F2,C5,CXCL11,CXCL12,CXCL10,MTUS1,PPIL2,CXCL16,OLR1,BDKRB1,PLA2G7,FUT7,PRKCA,PROC,YES1,SOS1,MERTK,CDC42,HMOX1,JAM2,JAM3,CREB3,ADORA3,ADORA1,EDNRA,EDNRB,TIRAP,WNT5A,CD244,BSG,SPP1,GAS6,TGFB2,MYO1G,SLC7A10,SLC7A11,CD2,APOB,APOD,MYO9B,CSF3R,KCTD7,FOX…	-0.756883	7.13503e-07	0.000329842
ion homeostasis(GO:0050801)	582	1309	112	16337	0.68	470	41501	1.12	CACNB4,NEU1,LRRK2,ADRA1A,SCN7A,SCN5A,GCK,FTL,SFXN3,STEAP3,STEAP4,STEAP2,STEAP1,NEO1,CAMK2D,CYBRD1,SNCA,KLHL3,SLC30A2,SLC30A3,SCARA5,BDH2,AGTR1,RIC3,XK,BDKRB1,BDKRB2,PLA2G6,TF,FKBP1B,PRKCE,COMMD1,PRNP,TTC7A,PQLC2,JAK2,ENPP1,EDNRB,ABCC2,EPHX2,GRIK2,TRDN,CA7,CA2,NDFIP1,ATP6V0D1,ATP6V0D2,IBTK,TRPV4,TRPM7,TRPM1,INPP4B,ATP6V1C2,ATP6V1G2,ATP6V1G1,ATP6V1E1,ATP6V1E2,CALM1,SRI,ARF1,ABL1,GDF2,DIAPH1,CLN5,PT…	SCN3B,SCN2B,BTBD9,SCN1B,CACNB4,CFTR,MTSS1,ATG5,NEU1,LRRK2,TBXA2R,ADRA1A,SCN7A,SCNN1G,SCNN1B,SCN5A,SCNN1A,GCK,FTL,C5AR1,SFXN3,SFXN4,SFXN1,SFXN2,SFXN5,STEAP3,STEAP4,PDPK1,FXN,STEAP2,STEAP1,MON1A,AVPR2,NEO1,SLC25A23,SLC25A28,SLC25A27,SLC25A37,CAMK2D,HFE,PPT1,SYPL2,NUBP1,CYBRD1,ANGPTL3,XCL1,NR3C2,VAPB,SNCA,AP3D1,ITPR3,ITPR1,WFS1,KLHL3,SLC4A3,FTH1,SLC30A4,SLC30A2,SLC30A3,SLC30A7,MAFG,PTPN6,PTPN3,SCARA…	-0.501949	8.28115e-07	0.000357304
dephosphorylation(GO:0016311)	399	1211	70	16379	0.43	329	41642	0.78	PCDH11X,MDP1,SGPP2,PTPRJ,PTPRK,PTPRS,PTPRQ,ACP5,PPM1G,PPM1B,PTPRZ1,PTPN4,PTPRD,PGAM5,PCIF1,MTMR10,PPP3CC,CYCS,FKBP1B,PPIP5K1,ANKLE2,JAK2,PFKFB3,PFKFB2,RNGTT,RBM26,PPP1CB,EPHX2,PSPH,TGFB2,MPHOSPH10,PHLPP2,PLEK,UBN1,PPP4R4,SYTL2,CALM1,GPATCH2,SSH2,LPIN1,CNEP1R1,INPP1,PPP1R12A,DUSP12,MTMR9,MTMR6,WNK1,TNS3,SSU72,PPP2R2A,FARP1,AKAP6,PPP1R36,CMYA5,PPP1R17,ZCCHC9,PPP6C,DUS2,UBLCP1,TIPRL,NT5M,ATP1A1,RIPK…	PPP1CA,NUAK1,PTPRN2,GBA,CTTNBP2NL,PPAT,VRK3,PPA2,PCDH11X,CTDNEP1,MDP1,PHPT1,SGPP2,CAMK2G,PTPRJ,PTPRK,PTPRM,PTPRF,PTPRG,PTPRH,PTPRR,PTPRS,PTPRT,PTPRU,PTPRN,PTPRO,PTPRQ,ACP6,ACP5,ACP2,ACP1,SDHAF2,ACPT,SMG6,SMG7,PPM1F,PPM1G,PPM1D,PPM1E,PPM1J,PPM1K,PPM1H,PPM1N,PPM1L,PPM1M,PPM1A,PPM1B,DUPD1,NUDT16,PTPRZ1,PHOSPHO2,PHOSPHO1,PTPN7,PTPN6,PTPN9,PTPN3,PTPN2,PTPN4,PTPN1,PTPRB,PTPRC,PTPRD,PTPRE,PTPRA,PGAM1,PG…	-0.614453	1.02828e-06	0.000381951
regulation of hormone levels(GO:0010817)	372	900	64	16385	0.39	308	41663	0.73	GCK,SGPL1,EXOC3L1,STXBP5L,ITPR2,EPHA5,PLA2G6,FKBP1B,GHRHR,PRKCE,CHD7,JAK2,PFKFB2,TBX3,ABCC2,KCNS3,SNAP25,FOXA1,FDX1,TTR,BLK,SPCS3,TRPV4,AQP1,SRI,CPQ,ILDR1,HNF1A,POMC,STARD5,NR0B2,ACVR1C,ACVR2B,EIF2AK3,HIF1A,STXBP1,SREBF1,SCP2,GPR68,BMP5,PPARD,AKAP5,SIRT4,SYBU,HSD17B4,SMPD3,SYT9,GJA1,CRYM,ATP1A1,INHBA,RAB8B,RAB1A,MME,RIMS2,CASR,DGAT2,UGT2B4,UGT2B7,PCLO,PCK2,CACNA1C,CACNA1D,NRXN1	KISS1R,PASK,GLUD1,PAX6,PAX8,ADH4,GCK,SCPEP1,SIDT2,SGPL1,NR1D1,SLC16A1,PHPT1,PLEKHA1,EXOC3L1,CAMK2G,TIPARP,HFE,CLOCK,FFAR4,FFAR3,DUOX2,DUOX1,STXBP5L,NR3C1,ACE2,HCAR2,CYP26A1,MED1,ITPR3,ITPR1,ITPR2,NEUROD1,ARNTL,TRERF1,ENSA,SCARB1,DIO1,CYP26B1,CYP26C1,PPP3CB,PPP3CA,IDE,C2CD2L,NDUFAF2,DHRS9,KLK6,CYP3A4,EPHA5,GHSR,BCO2,PLA2G6,FKBP1B,GHRHR,HTT,SRD5A3,SRD5A1,PRKCA,PRKCE,HPN,SLC18A2,ADCYAP1,CPT1A,KCNC2,…	-0.63797	1.03179e-06	0.000381951
steroid metabolic process(GO:0008202)	267	592	41	16408	0.25	226	41745	0.54	ACAA1,ACADL,SGPL1,NR1H4,NR1I2,AGTR1,FDFT1,C14orf1,CYB5R2,ABCC3,EPHX2,CYP2C19,APOB,FDX1,APOA2,EBPL,HNF1A,LGMN,STARD5,NR0B2,CYP46A1,SNX17,SREBF1,SCP2,BMP5,DHCR24,SLC27A2,SLC27A5,NPC2,LDLR,PPARD,HSD17B4,LCAT,PEX2,UGT2B17,INSIG2,LDLRAP1,ATP1A1,MVK,UGT2B4,UGT2B7	ACAA2,HSD11B1,ACAA1,CFTR,DHCR7,HINT2,ACADL,WWOX,SGPL1,ABCB11,NR1H4,NR1I2,CYP39A1,NR1D1,BLVRB,PLEKHA1,TIPARP,GFI1,ACBD3,ANGPTL3,ACOX2,ACADVL,NR3C1,MBTPS2,MBTPS1,NFKB1,MED1,TRERF1,SCARB1,SCARF1,AGTR1,GC,SULT4A1,CYP2R1,FDFT1,ABCA1,DHRS9,CYP3A4,CYP3A5,UXS1,C14orf1,G6PC,G6PD,CYP27A1,CYP27B1,SOD1,TSPO,SORL1,SRD5A3,SRD5A1,LMF1,PRLR,HMGCS1,HMGCS2,HSD3B7,SOAT1,SOAT2,NR5A2,MSMO1,CYB5R3,CYB5R1,CYB5R2,OSBPL5…	-0.773152	1.06229e-06	0.000381951
negative regulation of protein modification process(GO:0031400)	436	1052	79	16370	0.48	357	41614	0.85	LRRK2,LRRK1,ANAPC1,ANAPC4,ITGB1BP1,PTPRJ,XDH,UFL1,SNCA,NR2F2,SOCS5,ILK,BDKRB1,BDKRB2,MBIP,SNX6,PRNP,DEPTOR,LATS2,ENPP1,CDC23,PSMA2,PSMA6,PSMA3,PSMA7,PSMB7,PSMC6,PSMD2,PSMD7,PSME1,PSME2,ACER2,PKIB,KCTD7,IBTK,TAF7,SFN,SET,CALM1,TP73,ABL1,ENG,CDKN2A,CDKN2B,CDKN2D,CDKN1B,WNK1,UBXN1,CTNNB1,MYADM,LIMK1,BMP7,ANAPC10,SPRY4,SPRY2,BAG5,SPRED2,PSMB10,RGS2,GSK3B,RPS27A,TRIM39,TRIB2,APC,DUS2,HSPA1L,SLIT2,PSMD…	ERRFI1,ATG5,ATG7,LRRK2,LRRK1,PAX6,PRMT3,GBA,ADARB1,ANAPC1,ANAPC2,ANAPC5,ANAPC4,ANAPC7,PDPK1,PARD3,JARID2,TESC,ITGB1BP1,PBLD,PARK7,PECAM1,PTPRJ,HMG20B,HEXIM2,HEXIM1,MAS1,XDH,PPM1F,UFL1,PPM1E,SNCA,ADAR,FAM129A,NR2F2,SOCS4,SOCS5,TFAP4,PTPN6,PTPN2,PTPN1,MEN1,PAK2,BUB1B,PTPRC,ILK,CRTAP,PRKRIP1,HYAL2,CIB1,GTPBP4,MTF2,BDKRB1,BDKRB2,BCOR,EPHA1,G6PD,FKBP1A,MLLT1,MBIP,CHP1,SNX6,IRAK3,DNMT1,SORL1,PRKCA,PRKC…	-0.575302	1.34774e-06	0.000459083
regulation of cell motility(GO:2000145)	555	1224	107	16342	0.65	448	41523	1.07	SPATA13,ITGB1BP1,CAMK2D,SULF1,PTPRJ,PTPRK,SH3BGRL3,NR2F2,CYR61,ILK,BDKRB1,TF,PLXND1,CHRD,PRKCE,PRKD1,SYNE2,UNC5C,BBS4,JAK2,ENPP2,TBX5,ELP3,CSNK2B,TGFB2,BMPR2,HACE1,KCTD7,BMPER,ARAP3,BMP10,TEK,AQP1,GAB1,RAPGEF2,ADAM17,HOXA7,ARHGAP5,MARVELD3,TFAP2A,ABL1,GDF2,SCAI,DIAPH1,PTK2B,STK24,ENG,PODN,EVL,ACVR1C,TPM1,IGF1,AMOT,HIF1A,COL3A1,PDGFB,MMP9,CTNNA1,MYADM,CCL20,CCL21,CCL19,RPS6KB1,WDPCP,BMP5,RAF1,ETS1…	AMOTL1,ARHGEF39,NR2E1,NET1,FADD,SPATA13,IFITM1,ARHGDIA,HDAC5,HDAC9,HDAC7,HDAC6,PAX6,NEXN,ADARB1,FAM110C,C5AR2,SASH1,PDPK1,EMP2,SSX2IP,PHPT1,ITGB1BP1,CAMK1D,PBLD,CAMK2D,SULF1,PECAM1,PTPRJ,PTPRK,PTPRM,PTPRG,PTPRR,PTPRU,HGF,ARHGEF7,ANGPTL3,XCL1,PPM1F,SH3BGRL3,CCSAP,DOCK10,NR2F2,CYR61,MIEN1,SCARB1,PARD6B,PLVAP,PTPRC,PLET1,ILK,F7,F3,HYAL1,HYAL2,C5,LMNA,PTP4A1,CXCL12,CXCL10,MTUS1,CIB1,PRCP,CXCL16,GTPBP…	-0.499455	1.53789e-06	0.000467794
regulation of secretion(GO:0051046)	500	1225	94	16355	0.57	406	41565	0.97	NEU1,LRRK2,GCK,RAB3GAP1,PPIA,CAMK2A,EXPH5,STXBP5L,SNCA,FCER1G,ITPR2,AGTR1,EPHA5,PLA2G6,FKBP1B,GHRHR,CADPS2,PRKCE,PLA2R1,AP1G1,CHD7,JAK2,PFKFB2,EDNRB,KCNS3,CD276,CD274,DNM1L,SNAP25,GRIK1,TGFB3,TGFB2,ADORA2B,BLK,KCTD7,SPCS3,SYTL2,APOA2,TEK,AQP1,MYO6,SRI,SRGN,ABL1,ILDR1,HTR1B,HNF1A,POMC,NR0B2,ACVR1C,IFNAR1,HIF1A,STXBP1,STXBP6,STXBP5,WNK1,SREBF1,GPR68,CCL19,CHRNA6,RALA,PPARD,AKAP5,SIRT4,SYBU,SYT1,SYT…	KISS1R,PASK,ATG5,ATG7,NEU1,LRRK2,GLUD1,PAX6,PAX8,GCK,RAB3GAP1,SIDT2,C5AR2,NR1H2,NR1H3,PDPK1,AVPR2,NR1D1,SLC16A1,PPIA,PPID,PHPT1,NLRP3,NLRP1,CAMK2A,MAOB,CLOCK,FFAR4,FFAR3,EXPH5,ACHE,TLR10,STXBP5L,SNCG,SNCA,HCAR2,FCER1G,FCER1A,ITPR3,ITPR1,ITPR2,NEUROD1,ARNTL,ENSA,AGTR1,CRTAM,GOLPH3L,OPRM1,HYAL2,C5,PPP3CB,PPP3CA,ACSL4,ACSL3,CXCL12,C2CD2L,NDUFAF2,CYBA,EPHA5,GHSR,PLA2G6,FKBP1B,GHRHR,CADPS2,PRKCA,PRKCE…	-0.530334	1.48635e-06	0.000467794
Wnt signaling pathway(GO:0016055)	316	835	52	16397	0.32	264	41707	0.63	HDAC2,SULF2,SULF1,RSPO3,RSPO2,ILK,LZTS2,WNT8A,WNT8B,LATS2,CDC73,SOX7,MARK1,SCYL2,CSNK2B,CSNK1E,FOXO1,ATP6V1C2,CAPRIN2,ANKRD6,CTHRC1,NLE1,ABL1,WDR61,HNF1A,LGR5,CXXC4,SDC1,CTNNB1,FGF9,GATA4,GPRC5B,JUP,GSK3B,RNF146,RNF138,APC,NPHP3,DVL3,CDH1,CDH3,EGR1,DAPK3,CUL3,RYR2,MCC,ZEB2,GLI3,DAB2IP,FZD6,CCDC88C,CBY1	AMOTL1,AMOTL2,HDAC2,FRZB,WWOX,PIAS4,MDFI,CSNK1A1,CTDNEP1,CSNK1G1,CSNK1G2,PYGO1,PYGO2,CSNK1G3,SULF2,SULF1,PTPRU,PTPRO,SDHAF2,RSPO1,RSPO3,RSPO2,PPM1A,ZRANB1,TBL1X,NFKB1,TBX18,ARNTL,PAF1,AXIN2,AXIN1,WLS,ILK,LZTS2,SPIN1,WNT9A,WNT8A,WNT8B,LRRFIP2,VANGL2,CELSR2,CELSR1,MBD2,BCL9,TNKS2,TSKU,UBE2B,KLHL12,LATS1,LATS2,PPP2CA,FBXW11,HHEX,AMER3,AMER1,CDC42,CDC73,CHD8,PITX2,CYLD,BCL9L,DKK2,DKK3,DKK1,WNT5A,SOX7…	-0.691135	1.59015e-06	0.000467794
muscle structure development(GO:0061061)	549	1003	106	16343	0.64	443	41528	1.06	CACNB4,HDAC2,ACADM,AFG3L2,ZFHX3,NEO1,AEBP1,FOS,CFL2,CAMK2D,UNC45B,CNTFR,COPS2,TBX20,NR2F2,MAFF,ILK,WNT8A,NEURL2,XK,KLF5,CHUK,MSTN,EDNRB,RBM38,TBX3,TBX5,SETD3,EREG,TRDN,DDX17,HIF1AN,TTN,IFRD1,FOXN2,CFLAR,BMP10,HEY2,DCN,DNER,GPCPD1,LGALS1,SRI,XIRP1,XIRP2,MYF6,ASF1A,ABL1,IFT88,ASB2,ACVR1,ELN,FRG1,TPM1,IGF1,FBXO40,SDC1,ZFPM2,COL3A1,CTNNB1,CTNNA1,CTNNA2,FHL1,RPS6KB1,CAPZB,FGF9,KIAA1161,NFATC4,NFATC3,G…	TAGLN,CACNB4,ATG5,ATG7,HDAC5,HDAC4,HDAC2,ATF3,SCN8A,HDAC9,PAX3,ACADM,NEXN,PIAS1,MAML1,AFG3L2,ZFHX3,NEO1,NR1D2,MEOX2,NEBL,AEBP1,FOS,CFL2,ITGB1BP2,CAMK2D,HINFP,HMG20B,UNC45B,UNC45A,HLF,HLX,ACHE,CNTFR,BDNF,COPS2,TBX20,COPRS,NR2F2,TBX18,MED1,ARNTL,WT1,AXIN1,MAFF,SMTN,BVES,CYP26B1,ILK,MYLK2,SORT1,PPP3CA,WNT8A,LMNA,CXCL12,CXCL10,VAMP5,NEURL2,NR4A1,S100B,CXCL14,KY,ID3,HIRA,XK,KLF5,WFIKKN1,FKBP1A,BCL9,TM…	-0.497562	1.74587e-06	0.000491272
regulation of cell migration(GO:0030334)	524	1173	100	16349	0.61	424	41547	1.01	SPATA13,ITGB1BP1,CAMK2D,SULF1,PTPRJ,PTPRK,SH3BGRL3,NR2F2,CYR61,ILK,BDKRB1,TF,PLXND1,CHRD,PRKCE,PRKD1,SYNE2,UNC5C,JAK2,ENPP2,TBX5,ELP3,CSNK2B,TGFB2,BMPR2,HACE1,KCTD7,BMPER,ARAP3,BMP10,TEK,AQP1,GAB1,RAPGEF2,ADAM17,HOXA7,ARHGAP5,MARVELD3,TFAP2A,GDF2,SCAI,DIAPH1,PTK2B,STK24,ENG,PODN,EVL,ACVR1C,TPM1,IGF1,AMOT,HIF1A,COL3A1,PDGFB,MMP9,MYADM,CCL20,CCL21,CCL19,RPS6KB1,WDPCP,BMP5,ETS1,PPARD,ERBB4,RTN4,TNFA…	AMOTL1,ARHGEF39,NR2E1,NET1,FADD,SPATA13,IFITM1,ARHGDIA,HDAC5,HDAC9,HDAC7,HDAC6,PAX6,NEXN,ADARB1,FAM110C,C5AR2,SASH1,PDPK1,EMP2,ITGB1BP1,CAMK1D,PBLD,CAMK2D,SULF1,PECAM1,PTPRJ,PTPRK,PTPRM,PTPRG,PTPRR,PTPRU,HGF,ARHGEF7,ANGPTL3,XCL1,PPM1F,SH3BGRL3,DOCK10,NR2F2,CYR61,MIEN1,SCARB1,PARD6B,PLVAP,PTPRC,PLET1,ILK,F7,F3,HYAL1,HYAL2,C5,LMNA,PTP4A1,CXCL12,CXCL10,MTUS1,CIB1,PRCP,CXCL16,GTPBP4,BDKRB1,EPHA1,EPHA…	-0.511905	2.01783e-06	0.00053995
inflammatory response(GO:0006954)	514	1319	98	16351	0.6	416	41555	0.99	PARP4,SCN9A,MEP1B,TPST1,IL10RB,FOS,BMPR1B,ACP5,FCER1G,IL5RA,AGTR1,C2,MAPKAPK2,HP,BDKRB1,BDKRB2,AGER,TF,CHUK,PRKD1,PRKCQ,JAK2,ABCF1,EDNRB,PSMA6,EPHX2,CD276,SETD6,VNN1,C4A,ADORA2B,NDFIP1,KCTD7,IL2RA,PLS1,APOA2,TEK,CFH,CFB,TNFRSF1B,MAPK7,TP73,IL17RA,IER3,F11R,LY96,LY75,ITGB6,PLGRKT,ACVR1,HIF1A,SDC1,PTGS1,NOD1,GPR68,CCL20,CCL21,CCL19,SMAD1,LTB4R,SERPINA3,SERPINA1,SERPINC1,NFATC4,NFATC3,C4BPB,C4BPA,MY…	PARP4,TICAM1,TICAM2,ATRN,NLRC4,SCN9A,HDAC5,HDAC4,TBXA2R,HDAC9,GBA,MEP1B,IL6ST,C5AR2,C5AR1,PPBP,TPST1,NR1H3,IL10RB,NR1D2,FN1,FOS,TNIP2,TNIP1,NLRP3,NLRP1,CAMK1D,PARK7,BMPR1B,ACP5,CLOCK,FFAR4,FFAR3,NLRX1,MAS1,PGLYRP2,TLR10,XCL1,CCRL2,NFX1,HCK,ACE2,THEMIS2,BDNF,FCER1G,FCER1A,IL5RA,NFKB1,MEFV,PTPN2,SGMS1,AGTR1,F8,F3,F2,MCPH1,OPRM1,ELF3,HYAL1,HYAL2,HYAL3,C7,C9,C3,C6,C5,C2,CXCL11,CXCL10,PRCP,MAPKAPK2,HP…	-0.512989	2.08571e-06	0.00053995
positive regulation of transport(GO:0051050)	620	1427	123	16326	0.75	497	41474	1.18	CACNB2,NEU1,SCN5A,GCK,PPIA,ITGB1BP1,CAMK2A,EXPH5,STXBP5L,IPO5,SNCA,FCER1G,SLC30A3,KPNA1,C2,BDKRB1,TRIAP1,PLA2G6,GHRHR,PICK1,CADPS2,PRKCE,PLA2R1,AP1G1,MERTK,JAK2,PFKFB2,EDNRB,RBM22,CD276,CD274,DNM1L,ATP8A2,C4A,SCYL2,NFKBIA,GRIK1,TGFB3,TGFB2,ADORA2B,TRDN,WASL,CA2,TUB,BLK,SYTL2,TRPV2,TEK,AQP1,SFN,CALM1,SRI,ABL1,ILDR1,ADIPOR2,NR0B2,IFNAR1,AZIN1,IGF1,HIF1A,TMEM30A,STXBP1,STXBP5,PDGFB,SCP2,FHL1,GPR68,C…	SCN3B,SCN1B,CACNB2,PARP1,KISS1R,ANP32B,CFTR,ATG5,ATG7,NEU1,GLUD1,PAX6,SCN5A,GCK,SCN4B,NR1H2,NR1H3,PDPK1,TESC,PPIA,PPID,PHPT1,NLRP3,NLRP1,ITGB1BP1,MDM2,CAMK1D,CAMK2A,PARK7,BMPR1A,PPT1,SYNGR3,SMN1,FFAR3,EXPH5,SLC51B,MAVS,ACHE,XCL1,STXBP5L,IPO5,SNCA,HCAR2,ADD1,FCER1G,FCER1A,MED1,WFS1,SLC30A3,KPNA1,CRTAM,F2,GOLPH3L,HYAL2,C3,C5,PPP3CB,C2,ACSL3,ACSL6,CXCL11,CXCL12,C2CD2L,CXCL10,CIB1,ABCA7,ABCA1,CYBA,BD…	-0.464098	2.25333e-06	0.000549066
actin filament-based process(GO:0030029)	585	1575	115	16334	0.7	470	41501	1.12	HDAC2,PAWR,SCN5A,MSRB2,SPTBN1,ANTXR1,ITGB1BP1,CFL2,CAMK2D,ATXN3,SH3BGRL3,SPTAN1,ILK,NEURL2,EPHA5,PICK1,PRKCE,SYNE2,JMY,CORO6,JAK2,ELMO1,SPTB,ERMN,WASL,FBXO8,SEMA3E,PLEK,TTN,CFLAR,FOXJ1,TRPV4,BMP10,TEK,TRPM7,AQP1,ACTR3,ACTR2,MYO6,SRI,LLGL1,ARHGAP6,XIRP1,XIRP2,CRK,ARF1,ABI2,ABL1,FHOD1,RND3,RND1,PPFIA1,DIAPH1,SSH2,PTK2B,LPIN1,ELN,WASF3,WASF2,EVL,TPM1,TPM4,CDC42BPB,AMOT,PACSIN1,COBL,MYBPC1,PDGFB,OPHN…	NUAK2,KISS1R,PARVG,ARHGEF18,ARHGEF19,ARHGEF17,ARHGEF15,ARHGEF10,ARHGEF11,PARVB,PARVA,MTSS1,ENAH,HDAC2,PAWR,SCN5A,ALMS1,PDPK1,PARD3,MSRB1,MSRB2,NEBL,SPTBN5,SPTBN4,SPTBN2,SPTBN1,ANTXR1,PHPT1,ITGB1BP1,CFL2,CAMK2D,ATXN3,PECAM1,ARHGEF2,ARHGEF5,CAPZA2,CAPZA1,TWF1,TWF2,PIP5K1C,PIP5K1A,VASP,PPM1F,PPM1E,SH2B2,HCK,SH3BGRL3,ADD2,ADD1,PLEK2,PTPN1,PAK2,PAK3,GSN,PAK1,SPTAN1,ILK,MYLK2,CXCL12,NEURL2,SPECC1L,AVIL…	-0.475332	2.2906e-06	0.000549066
behavior(GO:0007610)	589	1000	116	16333	0.71	473	41498	1.13	SCN1A,CACNB4,GALR3,NEU1,LRRK2,SCN9A,ADRA1B,LRRN4,FYN,LSAMP,FOS,KIRREL3,ATXN1,PTPRJ,MAPT,CNTFR,ADCY1,SNCA,PTPRZ1,SLITRK1,SLITRK6,SLITRK5,MC1R,CRTC1,LRRTM1,NR4A2,ID2,AGER,MBD5,PLA2G6,TF,APBA2,FUOM,BCHE,PRKCE,PRKD1,PRNP,MYO15A,UNC79,BBS4,CHD7,SLC6A4,CYTB,ATP8A2,USP14,USP46,GRIK1,GRIK2,BMPR2,GRIA1,TNR,ASTN1,ADAM22,DBI,PMCH,ADAM17,MYO6,HOXA1,GRIN2A,ABAT,NLGN4X,ABI2,RMI1,VPS13A,GRM4,HTR1B,PTK2B,PAIP2,A…	BTBD9,SCN1A,CACNB4,MSS51,NR2E1,ATG7,GALR3,NEU1,LRRK2,SCN9A,ADRA1B,ADM2,SCN8A,GAA,C5AR2,ZFHX2,CPEB3,FXN,LRRN4,FYN,NHLH2,LSAMP,SPTBN4,SPTBN2,FOS,KIRREL3,CAMK1D,GFI1,PARK7,ATXN1,PTPRJ,PTPRO,NAGLU,PPT1,MAPT,CNTFR,XCL1,PPM1F,NR3C1,ACE2,SNCG,ADCY1,ADCY8,ADCY5,SNCA,BDNF,HPRT1,PTPRZ1,ITPR3,NEUROD2,WFS1,OBP2B,DSCAM,SLITRK1,SLITRK6,SLITRK5,MAFG,PTPN2,GLS,GPI,MC1R,F7,F3,CRTC1,VDAC1,OPRM1,KCNAB1,C5,LRRTM1,PP…	-0.473048	2.46017e-06	0.000568651
response to external biotic stimulus(GO:0043207)	617	1436	123	16326	0.75	494	41477	1.18	BCL10,AP2M1,DCLK1,NR1H4,IL10RB,FYN,APOBEC3H,APOBEC3C,FOS,ADAMTS4,ACP5,RPL39,BNIP3L,PPM1B,SNCA,FCER1G,IFNGR2,STMN1,MAPKAPK2,HP,BDKRB1,PRF1,CHUK,PRKCE,IRF9,IRF1,AP1G1,AP1M2,CDC73,JAK2,ABCF3,EDNRB,ABCE1,ZCCHC11,PSMA2,CMPK2,NFKBIA,ELMO1,WASL,APOB,AKIRIN2,IL2RA,PLS1,DCN,ADAM17,CLU,TNFRSF1B,PLAC8,MAPK8,ARG1,ARF1,ABL1,IER3,RNF5,LY96,ITGB6,TPT1,IFNAR1,IFNAR2,COCH,PELI1,IFNW1,IFNA5,NOD1,CCL20,CCL19,RPS6KB…	AP2S1,TICAM1,TICAM2,NLRC5,NLRC4,NLRC3,ATG5,BCL10,FADD,IFITM1,IFITM2,IFITM3,AP2M1,TBXA2R,ADH5,DCLK1,ADARB1,C5AR1,PPBP,NR1H4,NR1H3,SASH1,NR1D1,IL10RB,IL10RA,AP2A2,AP2A1,FYN,APOBEC3H,APOBEC3C,IL22RA1,FOS,TNIP2,NLRP3,NLRP1,GFI1,MST1R,ADAMTS5,ADAMTS4,ACP5,MAOB,NLRX1,GNG12,RPL39,BNIP3L,PGLYRP2,MAVS,XCL1,IFI44L,CSF2RB,PPM1D,PPM1B,TSPAN32,HCK,SAMHD1,ACE2,SNCA,FCER1G,ADAR,TBX21,NFKB1,PAF1,SCARB1,MUL1,PAK2…	-0.457971	2.70454e-06	0.00058346
response to other organism(GO:0051707)	617	1436	123	16326	0.75	494	41477	1.18	BCL10,AP2M1,DCLK1,NR1H4,IL10RB,FYN,APOBEC3H,APOBEC3C,FOS,ADAMTS4,ACP5,RPL39,BNIP3L,PPM1B,SNCA,FCER1G,IFNGR2,STMN1,MAPKAPK2,HP,BDKRB1,PRF1,CHUK,PRKCE,IRF9,IRF1,AP1G1,AP1M2,CDC73,JAK2,ABCF3,EDNRB,ABCE1,ZCCHC11,PSMA2,CMPK2,NFKBIA,ELMO1,WASL,APOB,AKIRIN2,IL2RA,PLS1,DCN,ADAM17,CLU,TNFRSF1B,PLAC8,MAPK8,ARG1,ARF1,ABL1,IER3,RNF5,LY96,ITGB6,TPT1,IFNAR1,IFNAR2,COCH,PELI1,IFNW1,IFNA5,NOD1,CCL20,CCL19,RPS6KB…	AP2S1,TICAM1,TICAM2,NLRC5,NLRC4,NLRC3,ATG5,BCL10,FADD,IFITM1,IFITM2,IFITM3,AP2M1,TBXA2R,ADH5,DCLK1,ADARB1,C5AR1,PPBP,NR1H4,NR1H3,SASH1,NR1D1,IL10RB,IL10RA,AP2A2,AP2A1,FYN,APOBEC3H,APOBEC3C,IL22RA1,FOS,TNIP2,NLRP3,NLRP1,GFI1,MST1R,ADAMTS5,ADAMTS4,ACP5,MAOB,NLRX1,GNG12,RPL39,BNIP3L,PGLYRP2,MAVS,XCL1,IFI44L,CSF2RB,PPM1D,PPM1B,TSPAN32,HCK,SAMHD1,ACE2,SNCA,FCER1G,ADAR,TBX21,NFKB1,PAF1,SCARB1,MUL1,PAK2…	-0.457971	2.70454e-06	0.00058346
regulation of protein serine/threonine kinase activity(GO:0071900)	427	979	79	16370	0.48	348	41623	0.83	FRS2,LRRK2,MAPRE3,PTPRJ,SNCA,NR2F2,ILK,MAPKAPK5,MAPKAPK2,NEK10,MBIP,LATS2,TGFB3,PKIB,ADORA2B,CCNA1,CCNE2,TAB1,GAB1,RAPGEF2,CCNT2,CCNT1,ADAM17,SFN,CALM1,SPDYA,TP73,ABL1,TPD52L1,GRM4,PTK2B,CDKN2A,CDKN2B,CDKN2D,CDKN1B,PDGFB,GNG3,NOD1,CCL19,KITLG,CHRNA7,PXN,BMP7,TNXB,SPRY4,SPRY2,BCCIP,HSPA2,PDCD10,SPRED2,MLK4,MAP3K7,RGS2,EZH2,RIPK1,GSK3B,RPS27A,CD40,RGCC,CCNK,CCNC,CXCR4,TRIB2,APC,DUS2,SPAG9,DVL3,MAP2…	GHR,FRS2,LRRK2,MAPRE3,GBA,C5AR1,MDFI,SASH1,PTPRJ,MST1R,HEXIM2,HEXIM1,HGF,MAS1,SNCA,FCER1A,COPS8,NR2F2,MADD,TFAP4,AXIN1,PTPN6,MUL1,MEN1,PAK3,PAK1,PTPRC,ILK,HYAL2,C5,ACSL1,CIB1,MAPKAPK5,MAPKAPK3,MAPKAPK2,NEK10,GTPBP4,VANGL2,EPHA4,SOD1,MBIP,IRAK3,SORL1,IRAK2,PRKCA,IRAK1,PRKCD,MAGED1,LATS1,LATS2,PPP2CA,PRKAR2B,PRKAR2A,HHEX,PRKAR1B,PRKAR1A,CDC37,TENM1,WNT5A,MALT1,MEF2C,DIRAS3,TGFB3,TGFB1,PKIG,PKIB,PKI…	-0.549552	4.10246e-06	0.000856488
G-protein coupled receptor signaling pathway(GO:0007186)	607	2897	122	16327	0.74	485	41486	1.16	CACNB4,GALR3,FRS2,LRRK2,ADRA1B,ADRA1A,SIGMAR1,ADCY3,ADCY4,ADCY1,ADCY2,SNCA,ADCY6,AGTR1,MC1R,ARL5A,BDKRB1,BDKRB2,GHRHR,PICK1,ADCYAP1R1,PRKCQ,KCNK2,SAR1A,JAK2,ENPP2,EDNRB,EREG,GRIK3,FNTB,ADORA2B,CA2,PLEK,KCTD8,DAGLA,NTSR2,TRPM1,RAPGEF2,PMCH,OR7D4,AKAP10,ADAM17,CALM1,RAMP3,ARF1,ARF3,ARL1,GPSM3,ATRNL1,GRM4,GRM2,LTB4R2,HTR1B,HTR1F,POMC,WASF2,PLCL1,PROKR2,LGR5,RGS18,GNA14,PREX2,GPR141,GPR156,GPR171,GPR…	CACNB4,KISS1R,MGRN1,ARHGEF12,ARHGEF11,ECEL1,GALR3,FRS2,LRRK2,ADRA1B,TBXA2R,ADRA1A,ADM2,ADRA1D,OR1N2,PAX8,C5AR2,C5AR1,SIGMAR1,AVPR2,PARD3,SPHK2,ARHGEF1,FFAR4,FFAR3,GNG13,GNG11,GNG12,MAS1,CERK,GNG10,VAV1,CCRL2,ADCY3,ADCY4,ADCY1,ADCY2,ADCY7,ADCY8,ADCY5,SNCA,ADCY6,BDNF,HCAR3,HCAR2,PALM,RXFP1,ITPR3,ADCY9,AXIN2,AXIN1,PTPN6,AGTR1,MC1R,CCR10,F2,ARL8A,ARL8B,OPRM1,ARL5A,ARL5B,SORT1,C3,C5,OPRL1,CXCL12,CXCL1…	-0.447592	5.39748e-06	0.000859328
embryo development ending in birth or egg hatching(GO:0009792)	608	889	122	16327	0.74	486	41485	1.16	BCL10,PAX2,HS6ST1,SULF2,SULF1,RSPO3,COPS3,NR2F2,CYR61,MAFF,AR,WNT8A,FUT8,APBA2,CHRD,XRCC4,XRCC2,BBS4,CHD7,TBX3,B9D1,MSH2,SPIC,MMP16,TGFB3,FOXA1,APOB,DCHS1,TTN,CNOT2,ARID1A,HEY2,TAB1,GAB1,HOXA1,HOXA2,HOXA5,HOXA7,HOXA9,SP3,CTHRC1,MED21,NLE1,MYCN,MYF6,IFT122,TFAP2A,EPN2,G2E3,LHX2,MFN2,WDR74,PCDH12,HNF1A,CECR2,ACVR1,TERF2,POLE,EN1,ACVR2A,TPM1,PLCD1,AMOT,PRKCSH,HIF1A,COBL,ZFPM2,PDGFB,ZNF830,CTNNB1,KIA…	MTSS1,ENAH,BCL10,TFEB,PAX6,PAX3,PAX2,PRMT1,MDFI,FXN,ZFP36L1,MEOX2,MEOX1,PYGO2,TET1,ZMIZ1,HINFP,HS6ST1,SULF2,SULF1,BMPR1A,OPA1,PTPRR,RSPO3,IPMK,VASP,ADD1,ADAR,COPS3,RESP18,NR2F2,CYR61,TBX15,TBX18,MED1,ARNT2,DSCAML1,AXIN2,AXIN1,MAFG,MAFF,NFE2,MEN1,GRN,ELF3,HYAL1,AR,WNT9A,C6,C5,ACSL4,WNT8A,LMO4,VANGL2,CELSR1,EPHA2,KLF1,MBD3,FUT8,APBA3,APBA2,APBA1,BIRC6,PLXNA2,PLXNB2,HTT,CHRD,UBE2A,UBE2B,PRKDC,POFUT1…	-0.449676	5.44383e-06	0.000859328
response to cytokine(GO:0034097)	592	1619	118	16331	0.72	474	41497	1.13	PARP9,IL11RA,IL10RB,FOS,CAMK2D,CAMK2B,CAMK2A,ADAMTS7,ACP5,CNTFR,PPM1B,SNCA,IL5RA,SUMO1,SOCS5,IFNGR2,KPNA5,KPNA3,KPNA1,MAPKAPK2,AGPAT1,CHUK,KLHL20,IRF9,IRF1,IRF2,NDUFA13,BBS4,JAK2,ZCCHC11,EREG,CSNK2B,FNTB,IL15RA,APOB,KCTD7,IL2RA,PLS1,RPL3,GAB1,OCSTAMP,PNPT1,GALT,TNFRSF1B,MAPK7,ARG1,IL17RA,EPOR,ADIPOR2,DCSTAMP,PTK2B,KYNU,IFNAR1,IFNAR2,TRAFD1,CDKN2B,HIF1A,COL3A1,IFNW1,CTNNB1,IFNA5,ZBP1,GPR75,RPS6KB1…	PARP9,TICAM2,GHR,CFTR,NLRC5,FADD,IL11RA,IFITM1,IFITM2,IFITM3,HDAC4,GBA,IL6ST,PIAS1,NR1H2,VRK2,NR1H3,AVPR2,IL10RB,IL10RA,IL22RA1,FOS,TNIP2,CAMK2G,CAMK2D,CAMK2B,GFI1,CAMK2A,PECAM1,PTPRN,ADAMTS7,MST1R,ACP5,ARHGEF2,MAVS,CNTFR,XCL1,DUOX1,CCRL2,CSF2RB,CSF2RA,PPM1B,SH2B2,HCK,SNCA,BDNF,YTHDC2,IL5RA,ADAR,NFKB1,MED1,SUMO1,SOCS5,PTPN6,PTPN2,MUL1,PTPN1,GSS,KPNB1,IFNGR2,IFNGR1,KPNA5,KPNA4,KPNA3,KPNA2,KPNA1,PL…	-0.457967	5.07272e-06	0.000859328
translation(GO:0006412)	558	1841	110	16339	0.67	448	41523	1.07	RPLP0,PARS2,PPA1,EEF1B2,LARP1,RPL18,RPL19,RPL12,RPL35,RPL36,RPL39,RPL32,RPL34,RPL26,RPL23,RPL21,VARS,FTSJ1,MAPKAPK5,ABCF1,ELOF1,GATB,GATC,GARS,WARS,LEKR1,SPCS3,MTIF2,MTIF3,RPSA,RPS6,RPS5,CNOT8,CNOT2,CNOT1,RPL7,RPL6,RPL3,RPS2,CAPRIN2,LIN28A,EIF3E,EIF3L,EIF4H,DARS2,PTK2B,DDX25,MRPL33,UHMK1,MRPL13,MRPL17,MRPL22,HARS2,EIF2AK3,PAIP2,EIF4EBP3,HARS,MRPS17,UPF3B,RPS6KA1,RPS6KB1,YARS2,IREB2,PDF,SRP68,SRP5…	RPLP2,RPLP0,RPLP1,BARHL2,SARS2,PARS2,PASK,ENC1,SARNP,PPA2,PPA1,CPEB2,CPEB3,ZFP36L1,EEF1E1,SEC61B,EEF1B2,GFM2,GFM1,EEF1A1,EEF1A2,SLC25A10,NELFA,LARP1,TNIP1,LARS2,ATXN2,RPL18,RPL17,RPL19,RPL14,RPL15,RPL10,RPL11,RPL12,QARS,LSM14B,RPL3L,RPL35,RPL36,RPL37,RPL39,RPL30,RPL32,RPL31,RPL34,MARS,RPL26,RPL27,RPL24,RPL28,RPL29,RPL23,RPL22,RPL21,EARS2,VARS,COPS5,FAM129A,SECISBP2,WT1,MTRF1L,FTSJ1,PABPC4,PABPC1,…	-0.47162	5.22277e-06	0.000859328
cation homeostasis(GO:0055080)	508	1169	98	16351	0.6	410	41561	0.98	CACNB4,NEU1,ADRA1A,SCN7A,GCK,FTL,SFXN3,STEAP3,STEAP4,STEAP2,STEAP1,NEO1,CAMK2D,CYBRD1,SNCA,SLC30A2,SLC30A3,SCARA5,BDH2,AGTR1,RIC3,XK,BDKRB1,BDKRB2,PLA2G6,TF,FKBP1B,PRKCE,COMMD1,PRNP,TTC7A,JAK2,EDNRB,EPHX2,GRIK2,TRDN,CA7,CA2,NDFIP1,ATP6V0D1,ATP6V0D2,IBTK,TRPV4,TRPM7,TRPM1,INPP4B,ATP6V1C2,ATP6V1G2,ATP6V1G1,ATP6V1E1,ATP6V1E2,CALM1,SRI,ARF1,ABL1,GDF2,DIAPH1,CLN5,PTK2B,TPT1,HIF1A,ATP7B,SLC4A10,GNG3,CC…	BTBD9,CACNB4,CFTR,MTSS1,ATG5,NEU1,TBXA2R,ADRA1A,SCN7A,SCNN1G,SCNN1B,SCNN1A,GCK,FTL,C5AR1,SFXN3,SFXN4,SFXN1,SFXN2,SFXN5,STEAP3,STEAP4,PDPK1,FXN,STEAP2,STEAP1,MON1A,AVPR2,NEO1,SLC25A23,SLC25A28,SLC25A27,SLC25A37,CAMK2D,HFE,PPT1,SYPL2,NUBP1,CYBRD1,XCL1,NR3C2,VAPB,SNCA,AP3D1,ITPR3,ITPR1,WFS1,SLC4A3,FTH1,SLC30A4,SLC30A2,SLC30A3,SLC30A7,MAFG,PTPN6,SCARA5,BDH2,PTPRC,AGTR1,CCR10,F2,RIC3,OPRM1,HYAL2,C7,C5…	-0.498317	4.76188e-06	0.000859328
lymphocyte activation(GO:0046649)	507	1207	98	16351	0.6	409	41562	0.97	BCL10,PAWR,FYN,SOCS5,IL7,ID2,FKBP1B,PRKCQ,PRNP,YES1,IRF1,XRCC4,PDCD1LG2,ZBTB1,AP1G1,MERTK,CHD7,ITK,CD276,CD274,MSH6,MSH2,VNN1,IL15RA,APLF,NDFIP1,FOXJ1,IL2RA,TESPA1,RPS6,MZB1,LGALS1,ADAM17,CR2,SP3,ABL1,SKAP2,DPP4,PTK2B,POLM,C10orf54,IFNAR1,IGF1,CDKN2A,PELI1,GPR183,RC3H2,RC3H1,IFNW1,CTNNB1,IFNA5,CCL21,CCL19,MAPKAP1,PPP2R3C,MYD88,BLNK,NCOR1,HSPH1,HLA-DRB3,HLA-DRB4,HLA-DRB5,ZNF683,BATF,KIF13B,MLH1,JM…	SART1,ZAP70,TICAM1,NLRC3,BCL10,FADD,HDAC5,HDAC4,HDAC9,PAWR,IMPDH1,SLA2,IL6ST,SASH3,PDPK1,ZFP36L1,ZFP36L2,FYN,TNIP2,HLX,RPL22,PGLYRP2,VAV3,VAV1,XCL1,TBX21,AP3B1,HPRT1,AP3D1,ITPKB,PAG1,SATB1,SOCS6,SOCS5,PTPN6,PTPN2,PAK2,PAK1,PTPRC,PATZ1,ELF4,IL12A,PPP3CB,PPP3CA,IL7,TXLNA,CXCL12,TNFSF9,TNFSF8,ID2,TPD52,KLF6,FUT7,FKBP1A,FKBP1B,BCL3,BCL6,SOD1,ZC3H8,MTOR,PRKCD,PRKCB,PRKCQ,PRNP,PRKCZ,PRKDC,YES1,GIMAP1,P…	-0.49585	4.75079e-06	0.000859328
negative regulation of cell differentiation(GO:0045596)	498	1033	96	16353	0.58	402	41569	0.96	JDP2,PAX2,ZFHX3,ITGB1BP1,ADAMTS7,XDH,MED7,SOCS5,TTC3,RIF1,ID2,FUOM,CHRD,IRF1,CDC73,ENPP1,ZCCHC11,TBX3,TBX5,SLC6A4,NFKBIA,EREG,FOXA1,FOXO1,FOXJ1,TNR,CNOT2,CNOT1,SPDEF,EFEMP1,HEY2,INPP4B,DCC,RAPGEF2,HOXA2,HOXA5,HOXA7,HOXA9,RNF10,MED21,MYCN,TP73,TEAD3,RNF6,LIN28A,NME2,WDR61,SPG20,PTK2B,N4BP2L2,NKX2-2,ZFPM2,RC3H1,CTNNB1,CTNNA1,GPR68,BMP7,BMP5,TOB1,RAF1,COL5A2,PPARG,RTN4,NOTCH4,ANKRD26,HAND2,JUP,EZH2,…	ANP32B,JDP2,NR2E1,NET1,ARHGDIA,HDAC5,HDAC4,ATF5,HDAC7,PAX6,PAX2,PRMT1,PAX8,FRZB,CUL4A,FST,NR1H2,NR1H3,ZFHX3,ZFP36L2,TMEM176B,TMEM176A,TET1,ITGB1BP1,PBLD,GFI1,BMPR1A,HMG20A,ADAMTS7,SDHAF2,HLX,ARHGEF2,ARHGEF1,PGLYRP2,XDH,NFYA,SMC3,BDNF,MED7,MED1,CCDC85B,SOCS5,ARNTL,PAF1,AXIN2,AXIN1,PTPN2,MEN1,F2,MCPH1,WNT9A,LMO2,CXCL10,CIB1,ABCA1,TTC3,ABCA5,S100B,CXCL14,RIF1,ID2,ID1,ID3,VANGL2,MTF2,EPHB2,KLF4,BCL6,…	-0.499161	4.98491e-06	0.000859328
negative regulation of intracellular signal transduction(GO:1902532)	378	862	68	16381	0.41	310	41661	0.74	HDAC3,HDAC2,ADRA1A,ITGB1BP1,PTPRJ,XDH,WWC1,WWC2,PPM1B,PARL,VDAC2,MAPKAPK5,BDKRB2,TRIAP1,MBIP,PRNP,DEPTOR,C3orf33,NDUFA13,TMEM161A,ELL3,VNN1,NFKBIA,PLEK,FOXO1,KCTD7,ARAP3,TBC1D7,CLU,MAPK7,TP73,ABL1,G2E3,SCAI,MFN2,NME5,TPT1,IGF1,CDKN2D,HIF1A,MYADM,BMP7,MAPKAP1,SPRY4,SPRY2,NCOR1,SH3BP4,CMYA5,RASSF2,BAG5,ANKRD26,SPRED2,RGS2,RIPK1,GSK3B,IL10,DYRK1A,APC,DUS2,SLIT2,CUL3,CASP8,FLCN,ZNF268,DAB2IP,CRHR2,RF…	MGRN1,NLRC3,HDAC3,HDAC2,ADRA1A,SLA2,GBA,FAF1,VRK3,PPIF,PLEKHA1,TNIP1,ITGB1BP1,MDM2,STAMBP,PARK7,PTPRJ,OPA1,PTPRR,HGS,ARHGEF2,NLRX1,XDH,WWC1,WWC2,WWC3,PPM1A,PPM1B,TAF9B,PARL,ITPR1,NEUROD1,WFS1,SOCS2,ARNTL,PTPN6,PTPN2,MUL1,PTPN1,MEN1,CRTC3,VDAC2,OPRM1,PGAP2,HYAL2,LMO3,CXCL12,CIB1,MAPKAPK5,MUC1,BDKRB2,EPHA2,KLF4,TRIAP1,BCL6,SOD2,MBIP,CHP1,IRAK3,SORL1,PRKCA,PRKCD,UBE2B,PRNP,DLC1,DEPTOR,C3orf33,NDUFA1…	-0.583621	5.27573e-06	0.000859328
carboxylic acid biosynthetic process(GO:0046394)	312	779	53	16396	0.32	259	41712	0.62	ACADM,ACADL,UGP2,NR1H4,DHFR,ASNSD1,MTRR,VCAN,ACSM3,ACSM1,MTAP,GGCT,ELOVL4,ELOVL2,PSPH,GART,HACD4,PLS1,SHMT1,DCN,FPGS,ALDH7A1,CTH,SCD5,HNF1A,MTHFD1,KYNU,ASNS,CYP46A1,PSAT1,SCP2,PTGS1,GMPS,SLC27A2,SLC27A5,HSD17B4,GOT2,SCD,CPS1,ASL,ALOX12,PEX2,NCAN,INSIG2,PECR,FAM213B,PTGES2,MTR,PRKAG1,ALOX5AP,PLOD1,CBR1,TBXAS1	GLUD2,GLUD1,ACADM,ACADL,UGP2,ATIC,ADI1,ABCB11,NR1H2,NR1H4,NR1H3,DHFR,CYP39A1,NR1D1,FA2H,ASNSD1,PARK7,TECR,ACOX2,ACADVL,FCER1A,MECR,GLS,GSS,HAGHL,GPT,AASDHPPT,DECR2,MTRR,VCAN,ACSL3,ACSM3,ACSM1,NDUFAB1,ACSF3,DHRS9,CYP27A1,MTAP,PLA2G5,ACSS2,ACSS1,HTT,BCAN,GGCT,HSD3B7,ELOVL1,ELOVL5,ELOVL4,ELOVL2,ELOVL7,ELOVL6,ENOPH1,MSMO1,ALDH9A1,CHDH,MCAT,GGT5,GGT7,PSPH,MGST2,ALDH8A1,GATM,GART,PLSCR1,GAMT,HACD3,HACD…	-0.652785	4.90804e-06	0.000859328
organic acid biosynthetic process(GO:0016053)	312	779	53	16396	0.32	259	41712	0.62	ACADM,ACADL,UGP2,NR1H4,DHFR,ASNSD1,MTRR,VCAN,ACSM3,ACSM1,MTAP,GGCT,ELOVL4,ELOVL2,PSPH,GART,HACD4,PLS1,SHMT1,DCN,FPGS,ALDH7A1,CTH,SCD5,HNF1A,MTHFD1,KYNU,ASNS,CYP46A1,PSAT1,SCP2,PTGS1,GMPS,SLC27A2,SLC27A5,HSD17B4,GOT2,SCD,CPS1,ASL,ALOX12,PEX2,NCAN,INSIG2,PECR,FAM213B,PTGES2,MTR,PRKAG1,ALOX5AP,PLOD1,CBR1,TBXAS1	GLUD2,GLUD1,ACADM,ACADL,UGP2,ATIC,ADI1,ABCB11,NR1H2,NR1H4,NR1H3,DHFR,CYP39A1,NR1D1,FA2H,ASNSD1,PARK7,TECR,ACOX2,ACADVL,FCER1A,MECR,GLS,GSS,HAGHL,GPT,AASDHPPT,DECR2,MTRR,VCAN,ACSL3,ACSM3,ACSM1,NDUFAB1,ACSF3,DHRS9,CYP27A1,MTAP,PLA2G5,ACSS2,ACSS1,HTT,BCAN,GGCT,HSD3B7,ELOVL1,ELOVL5,ELOVL4,ELOVL2,ELOVL7,ELOVL6,ENOPH1,MSMO1,ALDH9A1,CHDH,MCAT,GGT5,GGT7,PSPH,MGST2,ALDH8A1,GATM,GART,PLSCR1,GAMT,HACD3,HACD…	-0.652785	4.90804e-06	0.000859328
regulation of defense response(GO:0031347)	494	1387	95	16354	0.58	399	41572	0.95	PARP9,BCL10,ATF2,AP2M1,FYN,FOS,ACP5,PPM1B,FCER1G,SUMO1,IFNGR2,AGTR1,C2,MAPKAPK2,CHUK,PRKCE,IRF1,AP1G1,AP1M2,JAK2,EDNRB,PSMA6,CD276,SETD6,C4A,NFKBIA,ELMO1,EREG,MARCO,ADORA2B,NDFIP1,KCTD7,IL2RA,PLS1,TEK,TAB1,CFH,CFB,TNFRSF1B,MAPK8,MAPK7,ARF1,IL17RA,IER3,LY96,LGMN,IFNAR1,IFNAR2,TRAFD1,COCH,UBE2V1,PELI2,PELI1,UBE2D3,UBE2D2,IFNA5,NOD1,ZBP1,RPS6KA1,RPS6KA2,ELMOD2,SERPINC1,C4BPB,C4BPA,MYD88,PPARD,PPARG,…	PARP9,AP2S1,TICAM1,TICAM2,NLRC5,NLRC4,BCL10,FADD,ATF1,ATF2,AP2M1,SARM1,GBA,IL6ST,PIAS1,NR1H2,NR1H3,PDPK1,NR1D1,NR1D2,AP2A2,AP2A1,FYN,FOS,TNIP2,TNIP1,NLRP3,NLRP1,GFI1,PARK7,ACP5,CLOCK,FFAR4,FFAR3,NLRX1,MAS1,PGLYRP2,MAVS,TLR10,XCL1,PPM1B,TSPAN32,HCK,SAMHD1,ACE2,FCER1G,FCER1A,ADAR,NFKB1,NFKB2,MED1,SUMO1,MEFV,PTPN6,PTPN2,MUL1,PTPN1,PAK2,IFNGR2,IFNGR1,AGTR1,CRTAM,MCPH1,HYAL2,CNPY3,IL12A,C7,C9,C3,C6,C5…	-0.50213	5.66709e-06	0.000865377
posttranscriptional regulation of gene expression(GO:0010608)	473	1174	90	16359	0.55	383	41588	0.91	LARP1,VARS,SNCA,MYLIP,MAPKAPK5,MAPKAPK2,CDC73,ABCF1,ZCCHC11,RBM38,GATC,FBXW7,FBXL3,MORC3,MTIF2,MTIF3,RPS5,CNOT8,CNOT2,CNOT1,APOA2,TDRD7,USP3,CAPRIN2,CLU,TNFRSF1B,RNF5,LIN28A,EIF3E,EIF3L,EIF4H,SWSAP1,PTK2B,DPM2,AAK1,DDX25,VHL,UHMK1,EIF2AK3,PAIP2,EIF4EBP3,CDKN2A,STXBP1,RC3H2,RC3H1,NAA16,UPF3B,RPS6KA1,RPS6KB1,IREB2,SMAD1,TOB1,EIF4G1,UPF1,ETF1,AURKA,MYD88,TNRC6C,BAG6,RGS2,MTRF1,RPS27L,TIA1,DDX1,HSPA1…	BARHL2,DHX9,PASK,ENC1,SARNP,CPEB2,CPEB3,ZFP36L1,ZFP36L2,TESC,PPIB,LARP1,TNIP2,MDM2,MDM4,LARS2,PARK7,ATXN2,LSM14B,SLC51B,VARS,SNCA,TAF9B,ADAR,FAM129A,WFS1,SECISBP2,WT1,AXIN2,MUL1,DROSHA,MYLIP,PCID2,CRTAP,PABPC1,YTHDF2,MAPKAPK5,MAPKAPK2,PRKRA,PAIP2B,IARS,ID1,IARS2,MTG1,GTPBP4,EEFSEC,IFI30,BCL3,CHP1,MTPN,MTOR,PRKCD,UBE2B,PRKDC,PATL2,NGDN,IGFBP5,TCF3,CNOT10,CNOT11,FBXW11,IMPACT,CDC42,CDC73,CREB1,RBM8…	-0.515192	5.74957e-06	0.000865377
monocarboxylic acid metabolic process(GO:0032787)	560	1247	111	16338	0.67	449	41522	1.07	ACAA1,ACAD11,ACADM,ACADS,ACADL,UGP2,GCK,SGPL1,NR1H4,ACOT11,ACOT12,HK1,ACOX1,SNCA,ECHDC2,ADPGK,BDH2,CYP2J2,VCAN,ACSM3,ACSM1,ACSM5,MAPKAPK2,PRKCE,SLC5A6,HADHA,HADHB,ELOVL4,ELOVL2,AMDHD1,PFKFB3,PFKFB2,MCEE,ABCC3,ABCC1,EPHX2,CYP2C19,HACD4,DAGLA,SHMT1,DCN,HKDC1,ABAT,IER3,SCD5,ADIPOR2,EHHADH,HNF1A,P4HA2,KYNU,LPIN1,IDNK,EIF2AK3,CYP46A1,IGF1,HIF1A,MMAA,SREBF1,SCP2,PTGS1,SLC27A2,SLC27A5,SLC27A4,ECI2,TNXB,…	ACAA2,ACAA1,ACAD11,GHR,CYP4V2,HDAC4,FAAH,ACADM,ACADS,ACADL,UGP2,GCK,SCPEP1,SGPL1,ABCB11,NR1H2,NR1H4,NR1H3,CYP39A1,NR1D1,SLC16A3,SLC16A1,FA2H,LYPLA2,LYPLA1,SLC25A17,ACOT11,ACOT12,PARK7,PRODH,ACADSB,HK2,HK1,HK3,FTCD,HAL,TECR,ANGPTL3,ACOX2,ACOX1,ACOX3,ACADVL,SNCA,CYP26A1,FCER1A,MECR,ECHDC2,ADPGK,CYP26B1,ENO2,ENO3,BDH2,ENO4,ENO1,GPI,CYP26C1,PGAM1,PGAM2,CYP2J2,AASDHPPT,DECR2,DECR1,VCAN,C3,ACSL1,ACSL4,…	-0.464763	6.79993e-06	0.00100021
actin cytoskeleton organization(GO:0030036)	529	1437	104	16345	0.63	425	41546	1.01	HDAC2,PAWR,MSRB2,SPTBN1,ANTXR1,ITGB1BP1,CFL2,ATXN3,SH3BGRL3,SPTAN1,ILK,NEURL2,EPHA5,PICK1,PRKCE,JMY,CORO6,JAK2,ELMO1,SPTB,ERMN,WASL,FBXO8,SEMA3E,PLEK,TTN,CFLAR,FOXJ1,TRPV4,BMP10,TEK,TRPM7,AQP1,ACTR3,ACTR2,LLGL1,ARHGAP6,XIRP1,XIRP2,CRK,ARF1,ABI2,ABL1,FHOD1,RND3,RND1,PPFIA1,DIAPH1,SSH2,PTK2B,LPIN1,ELN,WASF3,WASF2,EVL,TPM1,CDC42BPB,AMOT,PACSIN1,COBL,PDGFB,OPHN1,MYADM,CCL21,LIMK1,CAPZB,CNN1,TNXB,RALA…	NUAK2,KISS1R,PARVG,ARHGEF18,ARHGEF19,ARHGEF17,ARHGEF15,ARHGEF10,ARHGEF11,PARVB,PARVA,MTSS1,ENAH,HDAC2,PAWR,ALMS1,PDPK1,MSRB1,MSRB2,NEBL,SPTBN5,SPTBN4,SPTBN2,SPTBN1,ANTXR1,PHPT1,ITGB1BP1,CFL2,ATXN3,PECAM1,ARHGEF2,ARHGEF5,CAPZA2,CAPZA1,TWF1,TWF2,PIP5K1C,PIP5K1A,VASP,PPM1F,PPM1E,SH2B2,HCK,SH3BGRL3,ADD2,ADD1,PLEK2,PTPN1,PAK2,PAK3,GSN,PAK1,SPTAN1,ILK,CXCL12,NEURL2,SPECC1L,AVIL,PRKG1,VANGL2,CELSR1,EPHA…	-0.474819	7.42567e-06	0.00104476
hormone metabolic process(GO:0042445)	146	378	18	16431	0.11	128	41843	0.3	SGPL1,GHRHR,FOXA1,FDX1,TTR,CPQ,POMC,STARD5,HIF1A,SCP2,BMP5,HSD17B4,CRYM,ATP1A1,MME,DGAT2,UGT2B4,UGT2B7	PAX8,ADH4,SCPEP1,SGPL1,PLEKHA1,TIPARP,HFE,FFAR3,DUOX2,DUOX1,NR3C1,ACE2,CYP26A1,MED1,TRERF1,SCARB1,DIO1,CYP26B1,CYP26C1,IDE,DHRS9,KLK6,CYP3A4,BCO2,GHRHR,HTT,SRD5A3,SRD5A1,HPN,CORIN,ALDH9A1,IYD,DKK3,ALDH8A1,FOXA1,SULT1A1,FDX1,TTR,SAFB,SDR16C5,ESR1,DDO,CPE,CPQ,ARNT,SCG5,AKR1C3,AKR1C2,AKR1C4,AKR1C1,AKR1D1,AKR1B1,STAR,STC2,DUOXA2,POMC,STARD3,STARD5,RETSAT,IGF2,HIF1A,STAT5B,RBP4,RBP1,ANPEP,WNT4,COMT,SC…	-1.0269	7.41656e-06	0.00104476
negative regulation of transcription from RNA polymerase II promoter(GO:0000122)	604	1380	122	16327	0.74	482	41489	1.15	ATF7IP,JDP2,HDAC3,HDAC2,PAWR,PAX2,WWP2,NR1H4,ZFHX3,AEBP1,ATXN1,WWC1,WWC2,SNCA,COPS2,TBX20,NR2F2,ID2,KLF5,IRF2,ZBTB1,MTA2,CDC73,YY1,JAZF1,EDNRB,TBX3,FOXA1,HIF1AN,FOXO1,AKIRIN2,FOXJ1,RCOR1,MZF1,CNOT2,CNOT1,ARID1A,SPDEF,TAF7,HEY2,ESR2,USP3,HOXA2,HOXA7,SP3,TP73,TFAP2A,ZMYND8,HNF1A,MXD1,KANK2,LPIN1,VHL,N4BP2L2,ENG,NR0B2,E2F6,ZFPM2,ZFP90,UBE2D3,SREBF1,CTNNB1,HSF4,STRN3,SMAD4,FASLG,BACH2,FGF9,ZNF593,NFA…	ATN1,PARP1,ATF7IP,ATRX,JDP2,NR2E1,SKOR1,SKOR2,NR2C1,HDAC5,HDAC4,HDAC3,HDAC2,ATF3,HDAC1,HDAC9,HDAC8,HDAC7,PAX6,PAWR,PAX3,PAX2,PRMT5,SLA2,FST,WWP2,PIAS4,PIAS1,NR1H2,NR1H4,NR1H3,MDFI,AEBP2,ZFHX3,CPEB3,NR1D1,JARID2,PPID,AEBP1,MDM2,MDM4,GFI1,ATXN1,HMG20A,HEXIM2,HEXIM1,MEPCE,RLIM,WWC1,WWC2,WWC3,NFX1,PPM1A,TBL1X,SNCA,TAF9B,COPS2,TBX20,NFKB1,NR2F6,NR2F2,NR2F1,TBX15,TBX18,MED1,SATB1,PAF1,WT1,MEN1,NFIX,ENO…	-0.441315	7.84822e-06	0.00107788
obsolete regulation of GTP catabolic process(GO:0033124)	546	1624	108	16341	0.66	438	41533	1.04	RALGPS1,LRRK2,SPATA13,RAB3GAP1,ITGB1BP1,RANBP10,ARHGEF4,ARHGEF6,SH3BGRL3,DOCK11,DIS3,PGAM5,RIC1,DNMBP,FAM13B,EPHB3,EPHA5,RIN3,CHN1,CHN2,RABGAP1L,PLEKHG3,PSD2,RASGRF2,RAB3IP,FBXO8,KCTD7,FOXJ1,SYDE2,ARAP3,ARAP2,SRGAP3,TBC1D9,TBC1D4,TBC1D7,RAPGEF2,GAPVD1,ASAP2,AKAP13,TBC1D15,LLGL1,TBC1D2B,ST5,GARNL3,ARHGAP6,ARHGAP5,CRK,DENND5B,DENND4C,PTK2B,DENND1A,DENND3,RGS18,SMAP1,AMOT,PREX2,SH2D3C,OPHN1,ARHGAP15…	ARHGEF40,RALGPS2,RALGPS1,ARHGEF26,ARHGEF25,ARHGEF28,ARHGEF33,ARHGEF39,ARHGEF37,ERRFI1,ARHGEF18,ARHGEF19,ARHGEF16,ARHGEF17,ARHGEF15,ARHGEF12,ARHGEF10,ARHGEF11,KNDC1,NET1,PTPRN2,LRRK2,SPATA13,ARHGDIG,ARHGDIA,TBXA2R,USP6NL,RAB3GAP2,RAB3GAP1,ACAP3,ACAP1,ACAP2,RABEP2,RABEP1,CPEB2,TAGAP,RALBP1,ITGB1BP1,PECAM1,RANBP10,ARHGEF4,ARHGEF3,ARHGEF2,ARHGEF1,ARHGEF7,ARHGEF6,ARHGEF5,ARHGEF9,VAV3,VAV2,VAV1,PIP5K1A…	-0.467277	8.16072e-06	0.00107788
regulation of GTPase activity(GO:0043087)	545	1623	108	16341	0.66	437	41534	1.04	RALGPS1,LRRK2,SPATA13,RAB3GAP1,ITGB1BP1,RANBP10,ARHGEF4,ARHGEF6,SH3BGRL3,DOCK11,DIS3,PGAM5,RIC1,DNMBP,FAM13B,EPHB3,EPHA5,RIN3,CHN1,CHN2,RABGAP1L,PLEKHG3,PSD2,RASGRF2,RAB3IP,FBXO8,KCTD7,FOXJ1,SYDE2,ARAP3,ARAP2,SRGAP3,TBC1D9,TBC1D4,TBC1D7,RAPGEF2,GAPVD1,ASAP2,AKAP13,TBC1D15,LLGL1,TBC1D2B,ST5,GARNL3,ARHGAP6,ARHGAP5,CRK,DENND5B,DENND4C,PTK2B,DENND1A,DENND3,RGS18,SMAP1,AMOT,PREX2,SH2D3C,OPHN1,ARHGAP15…	ARHGEF40,RALGPS2,RALGPS1,ARHGEF26,ARHGEF25,ARHGEF28,ARHGEF33,ARHGEF39,ARHGEF37,ERRFI1,ARHGEF18,ARHGEF19,ARHGEF16,ARHGEF17,ARHGEF15,ARHGEF12,ARHGEF10,ARHGEF11,KNDC1,NET1,PTPRN2,LRRK2,SPATA13,ARHGDIG,ARHGDIA,TBXA2R,USP6NL,RAB3GAP2,RAB3GAP1,ACAP3,ACAP1,ACAP2,RABEP2,RABEP1,CPEB2,TAGAP,RALBP1,ITGB1BP1,PECAM1,RANBP10,ARHGEF4,ARHGEF3,ARHGEF2,ARHGEF1,ARHGEF7,ARHGEF6,ARHGEF5,ARHGEF9,VAV3,VAV2,VAV1,PIP5K1A…	-0.464967	8.08998e-06	0.00107788
positive regulation of transferase activity(GO:0051347)	607	1364	123	16326	0.75	484	41487	1.15	POT1,FRS2,LRRK2,EPM2AIP1,ATF6,MAPRE3,ANAPC1,ANAPC4,GFPT1,ITGB1BP1,ADCY3,ADCY4,ADCY1,ADCY2,SNCA,ADCY6,CYR61,ILK,KDELR3,MAPKAPK5,MAPKAPK2,NEK10,FKBP14,PREB,IGFBP1,JAK2,PFKFB2,CDC23,PSMA2,PSMA6,PSMA3,PSMA7,PSMB7,PSMC6,PSMD2,PSMD7,PSME1,PSME2,PSME4,EREG,TGFB3,TGFB2,ADORA2B,FBXW7,ATP6V0D1,TEK,RPS2,TAB1,GAB1,RAPGEF2,SERINC5,SERINC1,ADAM17,CALM1,CLU,SPDYA,CRK,TP73,TPD52L1,GRM4,PTK2B,ASNS,SEC31A,TPP1,ACV…	KISS1R,GHR,POT1,FRS2,LRRK2,EPM2AIP1,ATF6,ATF3,MAPRE3,ANAPC1,ANAPC2,C5AR1,ANAPC5,ANAPC4,ANAPC7,MDFI,SASH1,PDPK1,FXN,XBP1,GFPT1,PARM1,ITGB1BP1,PARK7,MST1R,HGF,MAS1,VAV3,VAV2,ACADVL,MBTPS2,MBTPS1,ADCY3,ADCY4,ADCY1,ADCY2,ADCY7,VAPB,ADCY8,ADCY5,SNCA,ADCY6,ADD1,FCER1A,COPS8,CYR61,ADCY9,WFS1,MADD,AXIN1,MUL1,PAK2,PAK3,PAK1,PTPRC,ILK,KDELR3,C5,ACSL1,STRADA,LMNA,STRADB,CIB1,ARFGAP1,MAPKAPK5,MAPKAPK3,MAPKAP…	-0.437279	8.33581e-06	0.00107899
chemotaxis(GO:0006935)	614	1564	125	16324	0.76	489	41482	1.17	CACNB1,CACNB2,CACNB3,CACNB4,AP2M1,NEO1,FYN,SPTBN1,BMPR1B,PTPRJ,FCER1G,CYR61,SPTAN1,AGTR1,EPHB3,AGER,EPHA5,EPHA7,PLA2G6,TF,CHN1,PLXND1,PRKD1,PRKCQ,PRNP,UNC5C,ABLIM1,ENPP2,EDNRB,CLASP1,USP14,ELMO2,CSNK2B,TGFB2,SPTB,BMPR2,MYO10,WASL,SEMA3E,TNR,DCC,TRPC4,ADAM17,HOXA1,HOXA2,ABL1,RND1,LHX2,ITGA9,LTB4R2,PTK2B,GFRA3,PLGRKT,ENG,EVL,AMOT,COL3A1,PDGFB,OPHN1,CCL27,MYCBP2,CCL20,CCL21,CCL19,RPS6KA1,RPS6KA2,LIM…	SCN3B,SCN1B,CACNB1,CACNB2,CACNB3,CACNB4,AP2S1,ARHGEF16,ARHGEF12,ARHGEF11,PARVA,ENAH,NET1,AP2M1,ST8SIA4,SCN8A,PAX6,C5AR2,C5AR1,PPBP,NEO1,AP2A2,AP2A1,FYN,SPTBN5,SPTBN4,SPTBN2,SPTBN1,RALBP1,CAMK1D,BMPR1B,PTPRJ,PTPRM,PTPRO,HGF,ARHGEF5,NRCAM,VAV3,VAV2,VAV1,XCL1,PIP5K1C,PIP5K1A,CCRL2,VASP,PPM1F,SMC4,BDNF,FCER1G,CYR61,DSCAM,PTPN2,PAK2,PAK1,PTPRC,PTPRA,SPTAN1,AGTR1,CCR10,F7,F3,C5,CXCL11,CXCL12,CXCL10,MTU…	-0.431426	9.41472e-06	0.00108807
taxis(GO:0042330)	614	1564	125	16324	0.76	489	41482	1.17	CACNB1,CACNB2,CACNB3,CACNB4,AP2M1,NEO1,FYN,SPTBN1,BMPR1B,PTPRJ,FCER1G,CYR61,SPTAN1,AGTR1,EPHB3,AGER,EPHA5,EPHA7,PLA2G6,TF,CHN1,PLXND1,PRKD1,PRKCQ,PRNP,UNC5C,ABLIM1,ENPP2,EDNRB,CLASP1,USP14,ELMO2,CSNK2B,TGFB2,SPTB,BMPR2,MYO10,WASL,SEMA3E,TNR,DCC,TRPC4,ADAM17,HOXA1,HOXA2,ABL1,RND1,LHX2,ITGA9,LTB4R2,PTK2B,GFRA3,PLGRKT,ENG,EVL,AMOT,COL3A1,PDGFB,OPHN1,CCL27,MYCBP2,CCL20,CCL21,CCL19,RPS6KA1,RPS6KA2,LIM…	SCN3B,SCN1B,CACNB1,CACNB2,CACNB3,CACNB4,AP2S1,ARHGEF16,ARHGEF12,ARHGEF11,PARVA,ENAH,NET1,AP2M1,ST8SIA4,SCN8A,PAX6,C5AR2,C5AR1,PPBP,NEO1,AP2A2,AP2A1,FYN,SPTBN5,SPTBN4,SPTBN2,SPTBN1,RALBP1,CAMK1D,BMPR1B,PTPRJ,PTPRM,PTPRO,HGF,ARHGEF5,NRCAM,VAV3,VAV2,VAV1,XCL1,PIP5K1C,PIP5K1A,CCRL2,VASP,PPM1F,SMC4,BDNF,FCER1G,CYR61,DSCAM,PTPN2,PAK2,PAK1,PTPRC,PTPRA,SPTAN1,AGTR1,CCR10,F7,F3,C5,CXCL11,CXCL12,CXCL10,MTU…	-0.431426	9.41472e-06	0.00108807
positive regulation of kinase activity(GO:0033674)	502	1132	98	16351	0.6	404	41567	0.96	FRS2,LRRK2,ATF6,MAPRE3,GFPT1,ITGB1BP1,ADCY3,ADCY4,ADCY1,ADCY2,SNCA,ADCY6,CYR61,ILK,KDELR3,MAPKAPK5,MAPKAPK2,NEK10,FKBP14,PREB,IGFBP1,JAK2,PFKFB2,EREG,TGFB3,TGFB2,ADORA2B,FBXW7,ATP6V0D1,TEK,TAB1,GAB1,RAPGEF2,ADAM17,CALM1,CLU,SPDYA,CRK,TP73,TPD52L1,GRM4,PTK2B,ASNS,SEC31A,TPP1,ACVR2B,EIF2AK3,DUSP12,PDGFB,PDGFC,GNG3,NOD1,CCL21,CCL19,KIDINS220,KITLG,CHRNA7,PXN,CENPE,PPP2R3C,SPRY2,RAF1,AFAP1L2,GPRC5B,E…	KISS1R,GHR,FRS2,LRRK2,ATF6,ATF3,MAPRE3,C5AR1,MDFI,SASH1,PDPK1,XBP1,GFPT1,ITGB1BP1,PARK7,MST1R,HGF,MAS1,VAV3,VAV2,ACADVL,MBTPS2,MBTPS1,ADCY3,ADCY4,ADCY1,ADCY2,ADCY7,VAPB,ADCY8,ADCY5,SNCA,ADCY6,ADD1,FCER1A,COPS8,CYR61,ADCY9,WFS1,MADD,AXIN1,MUL1,PAK2,PAK3,PAK1,PTPRC,ILK,KDELR3,C5,ACSL1,STRADA,LMNA,STRADB,CIB1,ARFGAP1,MAPKAPK5,MAPKAPK3,MAPKAPK2,NEK10,VANGL2,EPHA4,EPHA8,FKBP14,SOD1,PREB,TOM1L1,IRAK2,I…	-0.48343	8.69096e-06	0.00108807
negative regulation of phosphorus metabolic process(GO:0010563)	379	924	69	16380	0.42	310	41661	0.74	GALR3,LRRK2,LRRK1,HDAC3,ITGB1BP1,ATXN1,PTPRJ,XDH,SNCA,NR2F2,SOCS5,ILK,BDKRB1,BDKRB2,MBIP,SNX6,PRNP,ANKLE2,DEPTOR,LATS2,C3orf33,ENPP1,EDNRB,PKIB,PLEK,FOXO1,KCTD7,IBTK,TAF7,SFN,CALM1,MAPK7,TP73,ABL1,GRM2,LTB4R2,HTR1B,ENG,IGF1,CDKN2A,CDKN2B,CDKN2D,CDKN1B,WNK1,PDGFB,MYADM,BMP7,SPRY4,SPRY2,NCOR1,AKAP6,ANKRD26,SPRED2,RGS2,GSK3B,TRIB2,APC,DUS2,SLIT2,INHBA,DNAJC3,CASP3,SAMSN1,FLCN,ANGPT1,P2RY13,CTDSPL,PD…	ERRFI1,GALR3,LRRK2,LRRK1,HDAC3,PAX6,GBA,ADARB1,VRK3,CPEB2,PDPK1,PARD3,TESC,PPIF,TNIP1,ITGB1BP1,PBLD,PARK7,ATXN1,ATXN7,PECAM1,PTPRJ,PTPRR,HEXIM2,HEXIM1,MAS1,XDH,PPM1F,PPM1E,SNCA,PALM,ADAR,FAM129A,NR2F2,SOCS4,SOCS5,TFAP4,PTPN6,PTPN2,PTPN1,MEN1,PAK2,PTPRC,ILK,PRKRIP1,OPRM1,HYAL2,LMO3,CIB1,BDKRB1,BDKRB2,EPHA1,KLF4,FKBP1A,MLLT1,BIRC3,MBIP,CHP1,SNX6,IRAK3,SORL1,PRKCA,PRKCD,UBE2B,LDLRAD4,PRNP,PRKCZ,PRKD…	-0.568961	9.27937e-06	0.00108807
negative regulation of phosphate metabolic process(GO:0045936)	379	924	69	16380	0.42	310	41661	0.74	GALR3,LRRK2,LRRK1,HDAC3,ITGB1BP1,ATXN1,PTPRJ,XDH,SNCA,NR2F2,SOCS5,ILK,BDKRB1,BDKRB2,MBIP,SNX6,PRNP,ANKLE2,DEPTOR,LATS2,C3orf33,ENPP1,EDNRB,PKIB,PLEK,FOXO1,KCTD7,IBTK,TAF7,SFN,CALM1,MAPK7,TP73,ABL1,GRM2,LTB4R2,HTR1B,ENG,IGF1,CDKN2A,CDKN2B,CDKN2D,CDKN1B,WNK1,PDGFB,MYADM,BMP7,SPRY4,SPRY2,NCOR1,AKAP6,ANKRD26,SPRED2,RGS2,GSK3B,TRIB2,APC,DUS2,SLIT2,INHBA,DNAJC3,CASP3,SAMSN1,FLCN,ANGPT1,P2RY13,CTDSPL,PD…	ERRFI1,GALR3,LRRK2,LRRK1,HDAC3,PAX6,GBA,ADARB1,VRK3,CPEB2,PDPK1,PARD3,TESC,PPIF,TNIP1,ITGB1BP1,PBLD,PARK7,ATXN1,ATXN7,PECAM1,PTPRJ,PTPRR,HEXIM2,HEXIM1,MAS1,XDH,PPM1F,PPM1E,SNCA,PALM,ADAR,FAM129A,NR2F2,SOCS4,SOCS5,TFAP4,PTPN6,PTPN2,PTPN1,MEN1,PAK2,PTPRC,ILK,PRKRIP1,OPRM1,HYAL2,LMO3,CIB1,BDKRB1,BDKRB2,EPHA1,KLF4,FKBP1A,MLLT1,BIRC3,MBIP,CHP1,SNX6,IRAK3,SORL1,PRKCA,PRKCD,UBE2B,LDLRAD4,PRNP,PRKCZ,PRKD…	-0.568961	9.27937e-06	0.00108807
response to inorganic substance(GO:0010035)	369	707	67	16382	0.41	302	41669	0.72	LRRK2,PAX2,SCN5A,FBLN5,SLC25A13,FOS,CAMK2D,CAMK2B,CYBRD1,ADCY1,SNCA,NR4A2,HP,ID2,FKBP1B,PRNP,XRCC4,GART,FNTB,CA2,APOB,FOXO1,TTN,TAT,AQP1,CALM1,GLRX2,ABAT,MAPK8,MAPK7,ARG1,TFAP2A,PTK2B,LOXL2,SEC31A,CDKN1B,ATP7B,SDC1,CTNNB1,CCL19,SLC40A1,IREB2,GPR37,PRDX6,BMP7,SERPINA1,NFATC4,NFATC3,ETS1,PPARG,SYT1,HOMER1,CPS1,EZH2,AXL,GSK3B,CD14,RHOB,CDH1,RYR2,BNIP3,CASP8,CASR,CACYBP,PCNA,ZNF277,ALOX5AP	GGH,PARP1,ATRX,NET1,LRRK2,ATF1,HDAC6,PAX2,ATIC,SCN5A,FXN,FBLN5,SLC25A24,SLC25A23,EEF1A2,SLC25A12,PPIF,SLC25A13,PLEKHA1,FOS,MDM2,CAMK2D,CAMK2B,PARK7,MAOB,HGF,CYBRD1,DUOX1,HBB,SNCG,ADCY1,SNCA,BDNF,NFKB1,ITPR3,NEUROD2,GSS,GSN,KPNA4,BDH1,PGAM2,PPP3CA,MTTP,MB,NR4A2,HP,OLR1,ID2,MTF1,KLF4,TH,FKBP1A,FKBP1B,SOD1,SOD3,SOD2,TSPO,CHP2,HTT,PRNP,HRG,SLC18A2,IGFBP2,XRCC4,HMGCS1,PPP2CB,MT2A,HMOX1,PSAP,CREB1,CYB5…	-0.57216	9.41341e-06	0.00108807
negative regulation of phosphorylation(GO:0042326)	334	776	59	16390	0.36	275	41696	0.66	LRRK2,LRRK1,HDAC3,ITGB1BP1,ATXN1,PTPRJ,XDH,SNCA,NR2F2,SOCS5,ILK,BDKRB1,BDKRB2,MBIP,SNX6,PRNP,ANKLE2,DEPTOR,LATS2,C3orf33,ENPP1,PKIB,FOXO1,KCTD7,IBTK,TAF7,SFN,CALM1,TP73,ABL1,ENG,IGF1,CDKN2A,CDKN2B,CDKN2D,CDKN1B,WNK1,MYADM,BMP7,SPRY4,SPRY2,NCOR1,ANKRD26,SPRED2,RGS2,GSK3B,TRIB2,APC,DUS2,SLIT2,INHBA,DNAJC3,CASP3,SAMSN1,FLCN,ANGPT1,CTDSPL,PDE4D,DAB2IP	ERRFI1,LRRK2,LRRK1,HDAC3,PAX6,GBA,ADARB1,VRK3,PDPK1,PARD3,TESC,PPIF,TNIP1,ITGB1BP1,PBLD,PARK7,ATXN1,ATXN7,PECAM1,PTPRJ,PTPRR,HEXIM2,HEXIM1,MAS1,XDH,PPM1F,PPM1E,SNCA,ADAR,FAM129A,NR2F2,SOCS4,SOCS5,TFAP4,PTPN6,PTPN2,PTPN1,MEN1,PAK2,PTPRC,ILK,PRKRIP1,HYAL2,LMO3,CIB1,BDKRB1,BDKRB2,EPHA1,KLF4,FKBP1A,MLLT1,BIRC3,MBIP,CHP1,SNX6,IRAK3,SORL1,PRKCA,PRKCD,UBE2B,LDLRAD4,PRNP,PRKCZ,PRKDC,ANKLE2,DEPTOR,LATS1,L…	-0.6055	1.01046e-05	0.00114732
cellular response to cytokine stimulus(GO:0071345)	488	1438	95	16354	0.58	393	41578	0.94	IL11RA,IL10RB,CAMK2D,CAMK2B,CAMK2A,ADAMTS7,CNTFR,PPM1B,IL5RA,SUMO1,SOCS5,IFNGR2,KPNA5,KPNA3,KPNA1,AGPAT1,CHUK,IRF9,IRF1,IRF2,NDUFA13,BBS4,JAK2,ZCCHC11,EREG,CSNK2B,IL15RA,APOB,KCTD7,IL2RA,RPL3,GAB1,OCSTAMP,PNPT1,GALT,TNFRSF1B,ARG1,IL17RA,EPOR,ADIPOR2,DCSTAMP,PTK2B,IFNAR1,IFNAR2,HIF1A,IFNW1,IFNA5,ZBP1,GPR75,TRADD,EIF4G1,RAE1,MYD88,PPARG,ROBO1,AKAP6,MKKS,TUBA1B,HLA-DRB3,HLA-DRB4,HLA-DRB5,RBMX,HSPA5,…	TICAM2,GHR,NLRC5,FADD,IL11RA,IFITM1,IFITM2,IFITM3,GBA,IL6ST,PIAS1,NR1H2,VRK2,NR1H3,IL10RB,IL10RA,IL22RA1,TNIP2,CAMK2G,CAMK2D,CAMK2B,GFI1,CAMK2A,PTPRN,ADAMTS7,MST1R,ARHGEF2,MAVS,CNTFR,XCL1,DUOX1,CCRL2,CSF2RB,CSF2RA,PPM1B,SH2B2,HCK,BDNF,IL5RA,ADAR,NFKB1,MED1,SUMO1,SOCS5,PTPN6,PTPN2,MUL1,PTPN1,KPNB1,IFNGR2,IFNGR1,KPNA5,KPNA4,KPNA3,KPNA2,KPNA1,PLVAP,PTPRC,SGMS1,CCR10,HYAL1,HYAL2,HYAL3,ACSL1,CXCL11,CX…	-0.486834	1.03561e-05	0.0011556
response to radiation(GO:0009314)	424	948	80	16369	0.49	344	41627	0.82	CACNB4,ADRA1B,GJA10,LRRN4,FOS,XPC,ATXN1,PTPRK,MFAP4,ZRANB3,COPS3,SCARA3,MC1R,CRTC1,ID2,TRIAP1,MBD4,PRKCQ,XRCC5,XRCC4,XRCC2,ELOVL4,YY1,ABCG5,TMEM161A,PPP1CB,MSH6,MSH2,ATP8A2,USF1,FNTB,DCUN1D3,FBXW7,CERS1,APOB,FBXL3,TTR,TUB,ERCC5,ERCC4,BRE,APOA2,TRPM1,AQP1,CALM1,HOXA1,GRIN2A,MAPK8,TP73,FKBPL,F11R,ASNS,POLH,CDKN2D,HIF1A,SDC1,HUS1,COL3A1,TROVE2,RFWD2,LDLR,NFATC4,FAM175A,CHEK1,ATM,TRIM13,LRP8,TOPBP1,R…	PPP1CA,CACNB4,FANCD2,NET1,ADRA1B,CUL4B,GJA10,NEK1,LRRN4,PPID,FOS,PLEKHB1,XPA,XPC,MDM2,ATXN1,PTPRK,CLOCK,MFAP4,PPM1D,ZRANB3,BDNF,COPS3,NR2F6,WRN,SCARA3,MEN1,PTPRC,MC1R,CRTC1,HYAL1,HYAL2,HYAL3,IL12A,CXCL12,CXCL10,XRRA1,IFI16,CYBA,ID2,TRIAP1,MBD4,TH,BCL3,SOD2,HTT,PRKCA,UBE2A,UBE2B,PRKCQ,PRKDC,UBE4B,XRCC5,XRCC4,XRCC2,XRCC6,HMGCS1,ELOVL4,MTA1,NIPBL,UIMC1,FIGNL1,YY1,ABCG5,TMEM161A,RBM4B,PPP1CC,PPP1CB,M…	-0.525255	1.06497e-05	0.00116822
chordate embryonic development(GO:0043009)	601	881	122	16327	0.74	479	41492	1.14	BCL10,PAX2,HS6ST1,SULF2,SULF1,RSPO3,COPS3,NR2F2,CYR61,MAFF,AR,WNT8A,FUT8,APBA2,CHRD,XRCC4,XRCC2,BBS4,CHD7,TBX3,B9D1,MSH2,SPIC,MMP16,TGFB3,FOXA1,APOB,DCHS1,TTN,CNOT2,ARID1A,HEY2,TAB1,GAB1,HOXA1,HOXA2,HOXA5,HOXA7,HOXA9,SP3,CTHRC1,MED21,NLE1,MYCN,MYF6,IFT122,TFAP2A,EPN2,G2E3,LHX2,MFN2,WDR74,PCDH12,HNF1A,CECR2,ACVR1,TERF2,POLE,EN1,ACVR2A,TPM1,PLCD1,AMOT,PRKCSH,HIF1A,COBL,ZFPM2,PDGFB,ZNF830,CTNNB1,KIA…	MTSS1,ENAH,BCL10,TFEB,PAX6,PAX3,PAX2,PRMT1,MDFI,ZFP36L1,MEOX2,MEOX1,PYGO2,TET1,ZMIZ1,HINFP,HS6ST1,SULF2,SULF1,BMPR1A,OPA1,PTPRR,RSPO3,IPMK,VASP,ADD1,ADAR,COPS3,RESP18,NR2F2,CYR61,TBX15,TBX18,MED1,ARNT2,DSCAML1,AXIN2,AXIN1,MAFG,MAFF,NFE2,MEN1,GRN,ELF3,HYAL1,AR,WNT9A,C6,C5,WNT8A,LMO4,VANGL2,CELSR1,EPHA2,KLF1,MBD3,FUT8,APBA3,APBA2,APBA1,BIRC6,PLXNA2,PLXNB2,HTT,CHRD,UBE2A,UBE2B,PRKDC,POFUT1,DLC1,XRCC…	-0.434999	1.13831e-05	0.00122785
organelle assembly(GO:0070925)	380	913	70	16379	0.43	310	41661	0.74	HDAC3,HDAC2,NEK6,CFL2,PAN3,LZTS2,NEURL2,HAUS6,ATG2B,BBS4,BBS7,BBS9,RAB3IP,ABLIM1,B9D1,ATP6V0D1,NIP7,TTN,CFLAR,POC1B,FOXJ1,RPSA,RPS6,TBC1D7,BMP10,CNOT2,CNOT1,ACTR2,TM9SF1,XIRP1,IFT88,RNF5,NME5,WDR35,TPM1,E2F4,SNX10,SENP6,RC3H1,WDPCP,IFT172,CENPC,CENPE,CENPW,CENPT,KIF27,DZIP1,AURKA,NCOR1,MKKS,ANLN,MLH1,TBPL1,CSF2,BICD1,AK7,PUM2,DICER1,ODF2,FOPNL,TMEM17,RAB1A,TTLL5,ULK1,ULK2,PCM1,PCNT,MYH11,MYH10,CH…	LRRC6,ARHGEF10,ATG5,ATG3,HDAC3,HDAC2,NEK6,NEK7,NEK1,NEMF,NEBL,CFL2,ATXN2,MAP9,ARHGEF5,BBIP1,ATG9B,ATG9A,ATG4C,ATG4B,KIF9,SCLT1,HCK,PAN3,TTC30B,SPICE1,LZTS2,SPAG16,SH3PXD2B,NEURL2,TTC8,HAUS7,HAUS8,HAUS4,HAUS3,HAUS6,HAUS5,HAUS1,RSPH1,VANGL2,RSPH9,CELSR3,CELSR2,ATG2B,ATG2A,ATG12,ATG14,ATG13,AGFG1,TSR1,UBE2B,PATL1,PATL2,KLHL41,TTC26,BBS4,BBS5,BBS7,BBS9,TTBK2,PRKAR1A,RAB3IP,BBS1,BBS2,EMC6,ABLIM1,ABLIM…	-0.554512	1.26503e-05	0.00134218
cytokine production(GO:0001816)	511	1277	101	16348	0.61	410	41561	0.98	BCL10,ATF2,PAWR,SULF2,SULF1,ACP5,PPM1B,FCER1G,IL5RA,MC1R,ELF1,LZTS1,MAPKAPK2,AGPAT1,CHUK,PRKCQ,PRNP,PLA2R1,IRF9,IRF1,XRCC5,JAK2,ZCCHC11,ITK,CD276,CD274,NFKBIA,EREG,TGFB3,TGFB2,ADORA2B,NDFIP1,AKIRIN2,KCTD7,FOXJ1,APOA2,TEK,ADAM17,CLU,SRGN,IL17RA,ABL1,GDF2,BTN3A2,POMC,C10orf54,IFNAR1,HIF1A,PELI1,UBE2D3,CTNNB1,NOD1,CCL20,ZBP1,CCL19,CHRNA7,SMAD4,NFATC4,MYD88,AFAP1L2,GATA6,GATA4,GPRC5B,BATF,TNFAIP8,HPS…	DHX9,TICAM1,TICAM2,NLRC5,NLRC4,ATG5,BCL10,FADD,ATF2,HDAC7,PAWR,GBA,IL6ST,C5AR2,SASH3,AVPR2,NLRP3,NLRP1,PARK7,SULF2,SULF1,ACP5,ARHGEF2,FFAR4,FFAR3,NLRX1,PGLYRP2,MAVS,TLR10,XCL1,PPM1B,ACE2,FCER1G,FCER1A,IL5RA,NFKB1,NFKB2,MEFV,MUL1,MC1R,CRTAM,ELF1,LZTS1,HYAL2,IL12A,C3,C5,ABCA1,MAPKAPK2,LRRFIP1,IFI16,TNFSF9,GHSR,KLF4,AGPAT1,PRG4,G6PD,MB21D1,ATG12,BCL3,BCL6,SOD1,TSPO,IRAK4,IRAK3,CHUK,PRKCD,PRKD2,PRKCQ…	-0.46798	1.31525e-05	0.00137295
cellular chemical homeostasis(GO:0055082)	525	1168	104	16345	0.63	421	41550	1	CACNB4,NEU1,ADRA1A,PAX2,GCK,FTL,STEAP3,CAMK2D,CYBRD1,HK1,SNCA,SLC30A2,SLC30A3,SCARA5,AGTR1,RIC3,XK,BDKRB1,BDKRB2,EPHA5,PLA2G6,TF,FKBP1B,PRKCE,PRNP,TTC7A,SLC6A12,JAK2,ENPP1,EDNRB,ABCC2,EPHX2,GRIK2,TRDN,CA7,CA2,NDFIP1,ATP6V0D1,ATP6V0D2,FOXO1,IBTK,TRPV4,TRPM7,TRPM1,INPP4B,HKDC1,LGALS1,ATP6V1C2,ATP6V1G2,ATP6V1G1,ATP6V1E1,ATP6V1E2,CALM1,SRI,ARF1,ABL1,GDF2,DIAPH1,NME2,CLN5,PTK2B,TPT1,HIF1A,ATP7B,GNG3,G…	CACNB4,CFTR,ATG5,NEU1,TBXA2R,ADRA1A,PAX6,PAX2,GCK,SIDT2,FTL,C5AR1,STEAP3,PDPK1,FXN,MON1A,NR1D1,SLC25A23,SLC25A27,PHPT1,CAMK2D,HFE,PPT1,SYPL2,NUBP1,CYBRD1,HK2,HK1,HK3,XCL1,NR3C2,VAPB,SNCA,AP3D1,ITPR3,ITPR1,NEUROD1,WFS1,SLC4A3,FTH1,SLC30A4,SLC30A2,SLC30A3,SLC30A7,MAFG,PTPN6,SCARA5,PTPRC,AGTR1,CCR10,F2,RIC3,OPRM1,C7,C5,PPP3CB,PPP3CA,OPRL1,CP,CXCL11,CXCL12,C2CD2L,CXCL10,PVALB,ABCB7,ABCB6,NDUFAF2,CYBA…	-0.465266	1.34473e-05	0.00138144
aminoglycan metabolic process(GO:0006022)	162	406	22	16427	0.13	140	41831	0.33	HS6ST1,VCAN,ABCC5,KERA,HEXA,DCN,GUSB,CLTC,IGF1,SDC1,HAS3,PDGFB,B4GALT3,B3GAT3,HPSE,IL15,NCAN,LUM,XYLT1,ANGPT1,GALNT5,GCNT2	EGFLAM,LYVE1,AP2A1,HS6ST2,HS6ST1,CSGALNACT1,CSGALNACT2,NAGLU,HGF,PGLYRP2,NFKB1,GNS,HYAL1,HYAL2,HYAL3,VCAN,IDS,CHPF,BCAN,IMPAD1,ST3GAL1,ST3GAL3,ST3GAL2,ST3GAL4,ST3GAL6,GALNS,ABCC5,TGFB1,HS3ST5,HS3ST1,CHI3L1,CHI3L2,CHST12,CHST11,CHST13,CHST15,BGN,KERA,ITIH1,ITIH4,ITIH5,ITIH2,ITIH3,HEXA,HEXB,DCN,GUSB,EGF,ARSB,DSE,CLTC,CHST2,CHST3,CHST1,CHST7,CHST6,HGSNAT,CHSY3,CHSY1,CLN6,IDUA,GXYLT1,B3GNT8,B3GNT4,B3…	-0.915889	1.48049e-05	0.00149715
regulation of cell adhesion(GO:0030155)	339	727	61	16388	0.37	278	41693	0.66	FBLN2,ITGB1BP1,ATXN3,PTPRJ,CYR61,ILK,EPHB3,EPHA7,CHRD,PRKCE,PRKCQ,JAK2,PPP1CB,ACER2,TGFB2,FOXA1,MYO10,SEMA3E,TNR,TEK,ADAM22,LGALS1,HOXA7,ARHGAP6,MAPK7,ABL1,RND1,DPP4,PTK2B,ENG,SPOCK1,TPM1,PPP1R12A,CDKN2A,MYADM,CCL21,WDPCP,BMP7,ROCK1,ROCK2,ANK3,LAMB1,LAMA2,LAMA4,ALOX12,GSK3B,PTK2,RGCC,CYTIP,EPCAM,DDR1,APC,CDH1,DAPK3,PIK3CB,EMILIN1,EPB41L5,TRIOBP,FLCN,ANGPT1,GCNT2	EGFLAM,NUAK1,NET1,ARHGDIG,TFE3,ARHGDIA,FAF1,PIEZO1,FBLN2,EMP2,TESC,ITGB1BP1,ATXN3,PTPRJ,PTPRO,ARHGEF7,VAV3,VAV1,PPM1F,CYR61,TBX18,DSCAM,NINJ1,DSCAML1,PTPN6,GSN,PTPRC,PLET1,ILK,HYAL1,IL12A,CXCL12,CIB1,PRKG1,GTPBP4,EPHB3,CELSR2,EPHA1,EPHA2,EPHA3,EPHA7,EPHA8,KLF4,BCL6,PLXNB1,PLXNB3,CHRD,PRKCA,PRKCE,PRKCD,PRKD2,PRKCQ,PRKCZ,HRG,PPP2CA,NID1,JAG2,DLL1,SEBOX,CDC42,JAM2,JAK2,AP1AR,PPP1CB,WNT5A,SOX9,FOXF1,…	-0.582963	1.58303e-05	0.00157621
regulation of small GTPase mediated signal transduction(GO:0051056)	522	1594	104	16345	0.63	418	41553	1	RALGPS1,SPATA13,ADRA1A,RAB3GAP1,ITGB1BP1,CAMK2D,RANBP10,ARHGEF4,ARHGEF6,SH3BGRL3,DOCK11,RIC1,DNMBP,FAM13B,EPHB3,EPHA5,RIN3,CHN1,CHN2,RABGAP1L,PLEKHG3,PSD2,RASGRF2,RAB3IP,FLOT1,FBXO8,KCTD7,FOXJ1,SYDE2,ARAP3,ARAP2,SRGAP3,TBC1D9,TBC1D4,TBC1D7,RAPGEF2,GAPVD1,ASAP2,AKAP13,TBC1D15,LLGL1,TBC1D2B,ST5,GARNL3,ARHGAP6,ARHGAP5,CRK,DENND5B,DENND4C,ABRA,SCAI,MFN2,PTK2B,DENND1A,DENND3,SMAP1,IGF1,AMOT,PREX2,COL3…	ARHGEF40,RALGPS1,ARHGEF26,ARHGEF25,ARHGEF28,ARHGEF33,ARHGEF39,ARHGEF37,ERRFI1,ARHGEF18,ARHGEF19,ARHGEF16,ARHGEF17,ARHGEF15,ARHGEF12,ARHGEF10,ARHGEF11,KNDC1,NET1,SPATA13,ARHGDIG,ARHGDIA,ADRA1A,USP6NL,RAB3GAP2,RAB3GAP1,ACAP3,ACAP1,ACAP2,TAGAP,SSX2IP,RALBP1,ITGB1BP1,CAMK2D,STAMBP,PECAM1,RANBP10,ARHGEF4,ARHGEF3,ARHGEF2,ARHGEF1,ARHGEF7,ARHGEF6,ARHGEF5,ARHGEF9,VAV3,VAV2,VAV1,PIP5K1A,SH2B2,SH3BGRL3,DEPD…	-0.458043	1.61426e-05	0.00158295
positive regulation of GTPase activity(GO:0043547)	502	1451	99	16350	0.6	403	41568	0.96	RALGPS1,LRRK2,SPATA13,RAB3GAP1,RANBP10,ARHGEF4,ARHGEF6,SH3BGRL3,DOCK11,DIS3,PGAM5,RIC1,DNMBP,FAM13B,RIN3,CHN1,CHN2,RABGAP1L,PLEKHG3,PSD2,RASGRF2,RAB3IP,FBXO8,KCTD7,FOXJ1,SYDE2,ARAP3,ARAP2,SRGAP3,TBC1D9,TBC1D4,TBC1D7,RAPGEF2,GAPVD1,ASAP2,AKAP13,TBC1D15,LLGL1,TBC1D2B,ST5,GARNL3,ARHGAP6,ARHGAP5,DENND5B,DENND4C,PTK2B,DENND1A,DENND3,RGS18,PREX2,SH2D3C,OPHN1,ARHGAP15,ARHGAP12,ARHGAP21,ARHGAP22,ARHGAP20…	ARHGEF40,RALGPS2,RALGPS1,ARHGEF26,ARHGEF25,ARHGEF28,ARHGEF33,ARHGEF39,ARHGEF37,ERRFI1,ARHGEF18,ARHGEF19,ARHGEF16,ARHGEF17,ARHGEF15,ARHGEF12,ARHGEF10,ARHGEF11,KNDC1,NET1,LRRK2,SPATA13,ARHGDIG,ARHGDIA,TBXA2R,USP6NL,RAB3GAP2,RAB3GAP1,ACAP3,ACAP1,ACAP2,RABEP2,RABEP1,TAGAP,RALBP1,RANBP10,ARHGEF4,ARHGEF3,ARHGEF2,ARHGEF1,ARHGEF7,ARHGEF6,ARHGEF5,ARHGEF9,VAV3,VAV2,VAV1,PIP5K1A,SH3BGRL3,DEPDC5,DOCK10,DOCK1…	-0.470714	1.70254e-05	0.00164461
response to extracellular stimulus(GO:0009991)	394	657	74	16375	0.45	320	41651	0.76	HIGD1A,BCL10,NEU1,PAX2,ACADM,ACADS,GCK,ACAT1,NR1H4,SLC25A25,LARP1,FOS,LZTS1,C2,NR4A2,ATG2B,FKBP1B,PICK1,BCHE,CADPS2,BBS4,ABCG8,ABCG5,SLC6A4,PSPH,USF1,SNAP29,IL15RA,ADORA2B,BMPR2,DMC1,FOXO1,DHODH,TM9SF1,GLRX2,ARG1,IFT88,RNF5,ADIPOR2,KYNU,ASNS,POMC,CDKN2B,CDKN2D,RRP8,SREBF1,RPS6KB1,ALDH3A1,BMP7,SLC27A4,SERPINC1,PPARD,PPARG,MKKS,HSPA5,CPS1,AIF1,SLC22A3,TRIM13,AXL,IL15,BCKDHB,NCOA1,EGR1,MAX,RAB1A,ZEB…	HIGD1A,NUAK2,ATG5,ATG7,BCL10,NEU1,ATG3,TBXA2R,HDAC6,PAX2,ACADM,ACADS,GCK,ACAT1,NR1H4,CPEB4,SLC16A1,SLC25A25,LARP1,FOS,MDM2,HFE,ATG9B,ATG9A,ATG4C,ATG4B,BDNF,MED1,NRBP2,ENSA,WRN,GSS,GSN,BDH1,F7,OPRM1,LZTS1,ACSL1,C2,ACSL4,ACSL3,ACSL6,CXCL10,VAMP8,ABCA1,NR4A2,IFI16,CYBA,CYBB,GHSR,ATG2B,ATG2A,G6PC,G6PD,ATG12,ATG14,ATG13,TH,FKBP1B,CYP27B1,SOD1,SOD2,TSPO,PICK1,BCHE,SNW1,CADPS2,MTOR,SLC18A2,IGFBP2,HMGCS1…	-0.530686	1.8311e-05	0.00171752
regulation of response to wounding(GO:1903034)	325	785	58	16391	0.35	267	41704	0.64	PTPRJ,ACP5,FCER1G,FAM46A,SCARA5,AGTR1,C2,TF,FKBP1B,PRKCE,PRKCQ,JAK2,TC2N,EDNRB,PSMA6,CD276,SETD6,C4A,USF1,ADORA2B,PLAT,NDFIP1,PLEK,KCTD7,TNR,IL2RA,TEK,TEC,CFH,CFB,TNFRSF1B,MAPK7,IL17RA,IER3,FAP,STK24,STXBP5,PDGFB,SERPINC1,C4BPB,C4BPA,MYD88,PPARD,PPARG,GPX2,GPRC5B,ANO6,HPSE,ALOX12,IL15,IL10,CD55,GJA1,LBH,PDPN,MVK,TSPAN8,CALCRL	GBA,IL6ST,NR1H3,NR1D2,TNIP1,NLRP3,NLRP1,PARK7,PTPRJ,ACP5,CLOCK,FFAR4,FFAR3,NLRX1,MAS1,PGLYRP2,TLR10,VAV2,XCL1,HCK,ACE2,FCER1G,FCER1A,NFKB1,FAM46A,MEFV,PTPN2,SCARA5,SCARF1,AGTR1,F7,F3,F2,MCPH1,HYAL2,C7,C9,C3,C6,C5,C2,KLK8,PRKG1,EPHA4,GHSR,KLF4,PLA2G7,TF,FKBP1B,BCL6,BIRC3,BIRC2,ZYX,PRKCA,PRKCE,PRKCD,PROC,PRKCQ,HRG,ADCYAP1,MTA1,SEBOX,JAK2,ADORA3,ADORA1,TC2N,ENPP4,EDNRA,EDNRB,SHARPIN,PSMA6,WNT5A,PSMB…	-0.592941	1.82296e-05	0.00171752
regulation of cellular response to stress(GO:0080135)	450	1022	87	16362	0.53	363	41608	0.86	LRRK2,HDAC3,NEK6,STEAP3,FBLN5,LARP1,XDH,SNCA,LZTS1,HP,BDKRB2,TRIAP1,FKBP1B,MBIP,PLA2R1,TMEM161A,ELL3,SETMAR,VNN1,MID1,GRIK2,TGFB2,FBXW7,FOXO1,TNR,BRE,GAB1,ANKRD6,PNPT1,CLU,TM9SF1,MAPK7,TP73,ABL1,IER3,IFT88,TPD52L1,RNF5,NME5,PTK2B,STK24,POLH,TPT1,EIF2AK3,TAOK1,CDKN2A,CDKN2D,HIF1A,FBXO18,UBE2V1,NOD1,CCL21,CCL19,GPR37,BMP7,DDX39B,TNXB,MYD88,NCOR1,FAM175A,ZNF622,CHEK1,BAG5,UBQLN1,SPRED2,MLK4,MAP3K7,A…	NUAK1,ATG7,LRRK2,HDAC3,HDAC6,CUL4A,PIAS4,NEK6,MDFI,SASH1,STEAP3,XBP1,FBLN5,EEF1E1,LARP1,MDM2,PARK7,BMPR1A,OPA1,HGF,ARHGEF2,XDH,SNCA,NUDT16,TAF9B,FCER1A,COPS5,WFS1,ARNTL,NRBP2,AXIN2,AXIN1,MUL1,MEN1,PAK1,SCARF1,LZTS1,PGAP2,CXCL12,MUC1,HP,KLK8,VANGL2,BDKRB2,EPHB1,EPHA4,TRIAP1,NSMCE1,FKBP1B,BCL6,SOD1,SOD2,MBIP,MTOR,PRKCG,PRKCD,UBE2N,PLA2R1,RWDD3,UIMC1,FIGNL1,CDC42,PSAP,SMYD2,TMEM161A,TIRAP,ELL3,WNT5A…	-0.495164	1.89325e-05	0.00175045
positive regulation of protein kinase activity(GO:0045860)	475	1086	93	16356	0.57	382	41589	0.91	FRS2,LRRK2,ATF6,MAPRE3,GFPT1,ITGB1BP1,ADCY3,ADCY4,ADCY1,ADCY2,SNCA,ADCY6,CYR61,ILK,KDELR3,MAPKAPK5,MAPKAPK2,NEK10,FKBP14,PREB,IGFBP1,JAK2,EREG,TGFB3,TGFB2,ADORA2B,FBXW7,ATP6V0D1,TAB1,GAB1,RAPGEF2,ADAM17,CALM1,CLU,SPDYA,CRK,TP73,TPD52L1,GRM4,PTK2B,ASNS,SEC31A,TPP1,ACVR2B,EIF2AK3,PDGFB,PDGFC,GNG3,NOD1,CCL21,CCL19,KIDINS220,KITLG,CHRNA7,PXN,CENPE,PPP2R3C,SPRY2,RAF1,AFAP1L2,GPRC5B,PDIA6,HSPA2,HSPA5,P…	KISS1R,GHR,FRS2,LRRK2,ATF6,ATF3,MAPRE3,C5AR1,MDFI,SASH1,PDPK1,XBP1,GFPT1,ITGB1BP1,PARK7,MST1R,HGF,MAS1,ACADVL,MBTPS2,MBTPS1,ADCY3,ADCY4,ADCY1,ADCY2,ADCY7,VAPB,ADCY8,ADCY5,SNCA,ADCY6,ADD1,FCER1A,COPS8,CYR61,ADCY9,WFS1,MADD,AXIN1,MUL1,PAK2,PAK3,PAK1,PTPRC,ILK,KDELR3,C5,ACSL1,STRADA,LMNA,STRADB,CIB1,ARFGAP1,MAPKAPK5,MAPKAPK3,MAPKAPK2,NEK10,VANGL2,EPHA4,FKBP14,SOD1,PREB,TOM1L1,IRAK2,IRAK1,PRKCZ,PRLR,…	-0.47958	1.98942e-05	0.00179519
protein processing(GO:0016485)	398	1004	75	16374	0.46	323	41648	0.77	LRRK2,HDAC2,AFG3L2,XDH,SNCA,SUMO1,SOCS5,C2,CYCS,TF,CYFIP2,IMMP2L,BBS7,JAK2,CYTB,C4A,ACER2,CSNK1E,FBXW7,PLAT,BID,SPCS3,BCL2L13,ATRAID,CFH,CFB,CLU,SRGN,TNFRSF1B,IFT88,CLN5,PLGRKT,POMC,CASP8AP2,EIF2AK3,CDKN2A,CDKN1B,UBXN1,OPHN1,NOD1,RPS6KA2,TRADD,RFWD2,IFT172,DHCR24,FASLG,SERPINA5,C4BPB,C4BPA,AURKA,PPARG,ROBO1,TYSND1,PPP1R9A,BAG5,BAG6,TSG101,RIPK1,GSK3B,RPS27L,IL10,RPS27A,NRDC,CD55,TRIB2,APH1B,CASP3…	PARP1,ANP32B,AIFM1,NLRC4,FADD,LRRK2,BEX3,HDAC2,HDAC6,NELL1,PIAS1,NR1H2,AFG3L2,FXN,XBP1,NLRP3,NLRP1,MDM2,PARK7,ADAMTS2,XDH,ACE2,SNCA,SUMO2,SUMO1,WFS1,SOCS4,SOCS5,AXIN1,PTPN3,MUL1,F3,F2,C7,C9,C3,C6,C5,C2,PRSS12,IDE,CYCS,IFI16,KLK6,HIP1,TF,OMA1,SNX9,MTCH1,CYFIP2,IMMP2L,LDLRAD3,IMMP1L,HPN,DLC1,KCNE2,FBXW11,BBS7,SEBOX,CORIN,JAK2,APAF1,OSBPL7,BBC3,KLK13,CYTB,PSMF1,AURKAIP1,C4A,KLKB1,ACER2,MMP14,C8A,C8B…	-0.526606	1.99712e-05	0.00179519
sulfur compound biosynthetic process(GO:0044272)	161	422	22	16427	0.13	139	41832	0.33	HS6ST1,SNCA,MTRR,VCAN,MTAP,GGCT,ELOVL4,ELOVL2,KERA,DCN,CTH,MTHFD1,IGF1,CTNNB1,B4GALT3,B3GAT3,NCAN,LUM,PDP2,MTR,XYLT1,ANGPT1	ADI1,HS6ST2,HS6ST1,CSGALNACT1,CSGALNACT2,ACLY,TECR,SNCA,GSS,HAGHL,MTRR,VCAN,ACSL1,ACSL4,ACSL6,ACSL5,MTAP,ACSS2,ACSS1,CHPF,BCAN,GGCT,DLAT,ELOVL1,ST3GAL1,ST3GAL3,ST3GAL2,ELOVL5,ELOVL4,ST3GAL4,ELOVL2,ST3GAL6,ELOVL7,ELOVL6,ENOPH1,GGT5,GGT7,MGST2,HS3ST5,APIP,CBS,CHST12,CHST11,CHST13,CHST15,BGN,KERA,MAT1A,MAT2A,MAT2B,EXTL3,EXTL2,DCN,CTH,MTHFR,LIAS,PNKD,DLD,DSE,CHST2,CHST3,CHST1,CHST7,CHST6,FAS,MTHFD1,C…	-0.908696	2.06067e-05	0.00182694
muscle organ development(GO:0007517)	351	682	64	16385	0.39	287	41684	0.68	HDAC2,ZFHX3,AEBP1,FOS,UNC45B,CNTFR,COPS2,TBX20,NR2F2,MAFF,ILK,XK,KLF5,MSTN,TBX3,TBX5,DDX17,HIF1AN,TTN,FOXN2,CFLAR,BMP10,HEY2,DCN,DNER,GPCPD1,SRI,XIRP2,MYF6,ASB2,ACVR1,ELN,FRG1,TPM1,IGF1,ZFPM2,COL3A1,FHL1,RPS6KB1,FGF9,KIAA1161,GATA6,GATA4,AKAP6,MKL2,ERBB4,HOMER1,LAMA2,SGCD,SGCE,BASP1,HAND1,COL14A1,GJA1,JPH1,CDON,FGF20,SAP30,EGR1,EGR2,RYR2,TCF21,NACA,NEB	TAGLN,HDAC5,HDAC4,HDAC2,ATF3,SCN8A,HDAC9,PAX3,ZFHX3,NR1D2,MEOX2,AEBP1,FOS,ITGB1BP2,HMG20B,UNC45B,UNC45A,HLF,HLX,ACHE,CNTFR,BDNF,COPS2,TBX20,COPRS,NR2F2,MED1,ARNTL,WT1,MAFF,SMTN,BVES,CYP26B1,ILK,MYLK2,PPP3CA,LMNA,CXCL10,VAMP5,NR4A1,S100B,CXCL14,KY,ID3,XK,KLF5,FKBP1A,BCL9,MTPN,MYLPF,KLHL40,KLHL41,IGFBP5,MSTN,DLL4,HIVEP3,CHD2,PITX2,COL11A1,SPEG,BCL9L,TBX3,TBX2,TBX5,TBX1,DKK1,WNT5A,SOX6,SOX9,SOX8,BTG…	-0.566848	2.17081e-05	0.00189858
microtubule-based process(GO:0007017)	566	1584	115	16334	0.7	451	41520	1.07	HDAC3,NEK6,TTC21B,EML1,TUBGCP4,ATXN3,MAP2,RANBP10,MAPT,AP3M2,SNCA,LZTS2,STMN4,STMN1,HAUS6,KLC1,KLHL42,XRCC3,XRCC2,BBS4,SPG7,UGT8,CLASP1,MID1,TRDN,TRPV4,ACTR3,ACTR2,IFT43,CKAP2,SON,ATAT1,IFT122,IFT88,FKBP4,DST,DIAPH1,MAP1A,NME5,TPPP3,WDR35,DNHD1,ASUN,PPP1R12A,DYX1C1,HIF1A,CDKN1B,E2F4,DCTN3,SENP6,MAP7D3,DNAL4,ARHGAP21,DNAH3,CEP68,CTNNB1,IFT172,CAPZB,MAP6D1,TTLL11,CENPE,CENPJ,KIF5B,KIF5C,KIF3C,TUBE1…	LRRC6,PARP3,ARHGEF10,HDAC3,HDAC6,PAX6,MAPRE1,NEK6,NEK7,PARD3,SLC16A1,SSX2IP,TTC21B,ZW10,EML4,EML2,EML1,TUBGCP4,TUBGCP3,TUBGCP6,NEFH,NEFM,TUBGCP2,ATXN3,ATXN7,OPA1,MAP2,MAP4,MAP7,MAP6,MAP9,RANBP10,AP3S2,AP3S1,NUBP1,MAPT,ARHGEF2,COPG1,SASS6,KIF9,KIF7,AP3M2,KIF6,AP3M1,SMC3,SNCA,CCSAP,TTC30B,AP3B2,AP3B1,AP3D1,AXIN1,SPICE1,HEPACAM2,MCPH1,LZTS2,LMNA,PRC1,CIB1,STMN2,STMN4,STMN1,SPECC1L,HAUS7,HAUS8,HAUS4,…	-0.433609	2.24674e-05	0.00192709
organic hydroxy compound metabolic process(GO:1901615)	470	1110	92	16357	0.56	378	41593	0.9	ACADM,ACADL,NR1H4,SGPP2,HDC,SNCA,MC1R,FDFT1,NR4A2,C14orf1,PLA2G6,BCHE,PPIP5K1,CYB5R2,ENPP6,ENPP2,PFKFB2,EPHX2,ACER2,TGFB2,APOB,FDX1,PLEK,TTR,PLBD1,PLTP,SHMT1,APOA2,INPP4B,DBI,RAPGEF2,CALM1,ALDH7A1,CPQ,GRIN2A,EBPL,DEGS2,HNF1A,PTK2B,DPM2,LPIN1,LGMN,NR0B2,PLCH1,INPP1,PLCD1,CYP46A1,IGF1,PSAT1,HIF1A,SNX17,CHPT1,SREBF1,ALDH2,COQ3,COQ2,SCP2,SMPDL3A,GPR37,ALDH3A2,BMP5,DHCR24,NPC2,LDLR,PPARD,MBOAT2,GPD2,S…	ACAA2,BTBD9,CFTR,DHCR7,GK5,ISYNA1,PAX8,ACADM,ACADL,ADH5,ADH6,ADH4,GBA,NR1H4,CYP39A1,SGPP2,GFI1,PARK7,SPHK2,MAOA,MAOB,MAS1,ACHE,ANGPTL3,DUOX2,DUOX1,HDC,IPMK,ACADVL,MBTPS2,IPPK,MBTPS1,SNCA,NUDT11,NFKB1,MED1,HPRT1,ITPKB,ITPKC,PHOSPHO1,TRERF1,SCARB1,DIO1,SCARF1,GPT,SGMS2,SGMS1,MC1R,GC,CYP2R1,GK,ACSL3,FDFT1,LRTOMT,ABCA1,NR4A2,DHRS9,CYP3A4,C14orf1,CHKA,CHKB,G6PD,CYP27A1,PLA2G6,PLA2G5,TH,CYP27B1,MOGAT3,…	-0.47983	2.26296e-05	0.00192709
response to bacterium(GO:0009617)	345	745	63	16386	0.38	282	41689	0.67	BCL10,NR1H4,FOS,ADAMTS4,ACP5,RPL39,SNCA,FCER1G,MAPKAPK2,HP,BDKRB1,CHUK,PRKCE,CDC73,JAK2,EDNRB,ZCCHC11,CMPK2,NFKBIA,WASL,APOB,AKIRIN2,DCN,ADAM17,TNFRSF1B,PLAC8,MAPK8,ARG1,ABL1,RNF5,LY96,COCH,PELI1,NOD1,CCL20,RPS6KB1,FASLG,SERPINA1,MYD88,GPX2,TNFAIP8,CPS1,CSF2,AXL,IL10,HLA-A,HLA-B,CD40,CD55,GJB6,CD14,NCF1,HMGB2,DEF6,TJP1,LYZ,CASP8,RAB1A,HNRNPA0,PDE4D,TIMP4,DAB2IP,NFKBIL1	TICAM1,TICAM2,NLRC4,NLRC3,BCL10,TBXA2R,ADH5,C5AR1,PPBP,NR1H4,NR1H3,SASH1,NR1D1,IL10RA,IL22RA1,FOS,TNIP2,NLRP3,NLRP1,GFI1,ADAMTS5,ADAMTS4,ACP5,MAOB,GNG12,RPL39,PGLYRP2,MAVS,CSF2RB,PPM1D,HCK,SNCA,FCER1G,NFKB1,PAF1,SCARB1,DROSHA,SGMS1,OPRM1,IL12A,CXCL10,MAPKAPK3,ABCA1,MAPKAPK2,CXCL16,HP,TNFSF8,BDKRB1,MTDH,TH,CYP27B1,BCL3,SOD2,TSPO,IRAK3,CHUK,IRAK2,PRKCA,IRAK1,PRKCE,PRKCD,MBL2,IRF5,IRF8,IRF3,TCF3,KCN…	-0.564962	2.43718e-05	0.0020485
vasculature development(GO:0001944)	589	1135	121	16328	0.74	468	41503	1.12	SGPL1,ITGB1BP1,HS6ST1,SULF1,DDAH1,PTPRJ,SLC4A7,XDH,TSPAN12,TBX20,NR2F2,CYR61,EPHB3,KLF5,TF,PLXND1,PRKD1,CHD7,TBX3,TBX5,B9D1,EREG,TGFB2,BMPR2,FBXW7,WARS,APOB,HIF1AN,SEMA3E,FOXO1,BMPER,ARID1A,TEK,HEY2,AQP1,RAPGEF2,HOXA1,HOXA3,HOXA5,HOXA7,MAPK7,IFT88,GDF2,PTK2B,COL1A2,LOXL2,ACVR1,ENG,ACVR2B,PLCD1,IGF1,AMOT,HIF1A,THSD7A,ZFPM2,COL3A1,PDGFB,ARHGAP22,PGF,CTNNB1,CHRNA7,BMP7,GTF2I,FASLG,RAE1,FGF9,NFATC4,N…	ERRFI1,ANP32B,ARHGEF15,PARVA,DHCR7,NR2E1,HDAC5,TBXA2R,ADM2,HDAC9,HDAC7,PAX6,FRZB,SGPL1,SASH1,ZFP36L1,MEOX2,EMP2,FN1,ITGB1BP1,ZMIZ1,TIPARP,HS6ST1,SULF1,DDAH1,PTPRJ,PTPRM,SPHK2,HGF,SLC4A7,NRCAM,XDH,ANGPTL6,ANGPTL3,ANGPTL4,VAV3,VAV2,TSPAN12,ADD1,TBX20,NR2F2,CYR61,MED1,WT1,NFE2,PTPRB,GPI,F3,HYAL1,C3,C6,C5,C1GALT1,CXCL12,CXCL10,CIB1,PRCP,NR4A1,CXCL17,ID1,EPHB3,EPHB4,EPHB1,EPHB2,KLF5,EPHA1,EPHA2,KLF4,T…	-0.419793	2.6528e-05	0.00220114
signal release(GO:0023061)	340	777	62	16387	0.38	278	41693	0.66	LRRK2,GCK,RAB3GAP1,EXOC3L1,CAMK2A,STXBP5L,SNCA,ITPR2,EPHA5,PLA2G6,FKBP1B,GHRHR,CADPS2,PRKCE,SLC6A12,SLC6A13,CHD7,JAK2,PFKFB2,TBX3,KCNS3,SNAP25,BLK,SPCS3,TRPV4,AQP1,SRI,ABAT,GRM4,ILDR1,HNF1A,POMC,NR0B2,ACVR1C,ACVR2B,EIF2AK3,HIF1A,STXBP1,SREBF1,GPR68,PPARD,AKAP5,SIRT4,SYBU,SMPD3,SYT1,SYT9,GJA1,INHBA,RAB8B,RAB1A,RIMS2,RIMS1,CASR,PCLO,PCK2,STX7,CACNA1C,CACNA1D,CACNA1B,NRXN3,NRXN1	KISS1R,PASK,LRRK2,GLUD1,PAX6,PAX8,GCK,RAB3GAP1,SIDT2,NR1D1,XBP1,SLC16A1,PHPT1,EXOC3L1,CAMK2G,CAMK2A,PPT1,MAOA,CLOCK,FFAR4,FFAR3,PIP5K1C,STXBP5L,SNCG,SNCA,HCAR2,ITPR3,ITPR1,ITPR2,NEUROD1,ARNTL,ENSA,GLS,OPRM1,SNPH,PPP3CB,PPP3CA,C2CD2L,VAMP1,NDUFAF2,EPHA5,GHSR,PLA2G6,FKBP1B,GHRHR,HTT,CADPS2,PRKCA,PRKCE,DTNBP1,SLC18A2,ADCYAP1,SYNJ1,CPT1A,KCNC2,KCNC4,KCNC3,PRKAR2B,PRKAR2A,IRS1,KCNA5,SLC6A11,KCNB1,SLC6…	-0.566642	2.76886e-05	0.00226836
regulation of protein localization(GO:0032880)	530	1296	107	16342	0.65	423	41548	1.01	LRRK2,AP2M1,WWP2,FYN,PPIA,ITGB1BP1,TONSL,EXPH5,STXBP5L,IPO5,PPM1B,PARL,SUMO1,KPNA1,LZTS2,AR,PPP3CC,WNT8A,RABGAP1L,PRNP,JAK2,RBM22,B9D1,CD276,CD274,DNM1L,NFKBIA,SNAP25,TGFB3,TGFB2,WAPL,FBXW7,WASL,NDFIP1,NDFIP2,BID,KCTD7,APOA2,TEK,GAPVD1,SFN,SRI,SRGN,RAMP3,MAPK8,MAPK7,ABL1,PPFIA1,CLTC,AAK1,UHMK1,IFNAR1,LYPLAL1,IGF1,CDKN2A,TMEM30A,CTNNB1,MYCBP2,CCL19,CHRM1,WDPCP,SMAD4,BMP7,KIF5B,YWHAQ,AKAP6,ERBB4,RA…	PARP1,ANP32B,ARHGEF16,ATG5,LRRK2,ARHGDIG,ARHGDIA,AP2M1,HDAC8,HDAC6,FAF1,WWP2,C5AR2,NR1H2,NR1H3,MDFI,PDPK1,FYN,LYPLA1,PPIA,PPID,NLRP3,NLRP1,ITGB1BP1,MDM2,PBLD,TONSL,PARK7,BMPR1A,SMN1,FFAR4,EXPH5,SLC51B,MAVS,ACHE,TLR10,STXBP5L,IPO5,PPM1A,PPM1B,MBTPS1,PARL,MED1,SUMO1,FNDC1,AXIN2,AXIN1,KPNA1,CRTAM,GOLPH3L,OPRM1,LZTS2,HYAL2,AR,PKDCC,C5,PPP3CC,ACSL3,WNT8A,LMNA,CIB1,VAMP7,VAMP4,CELSR3,CELSR2,EPHA2,FKBP1…	-0.441432	2.8642e-05	0.00231713
metal ion homeostasis(GO:0055065)	462	1093	91	16358	0.55	371	41600	0.88	CACNB4,NEU1,ADRA1A,SCN7A,GCK,FTL,SFXN3,STEAP3,STEAP4,STEAP2,STEAP1,NEO1,CAMK2D,CYBRD1,SNCA,SLC30A2,SLC30A3,SCARA5,BDH2,AGTR1,RIC3,XK,BDKRB1,BDKRB2,PLA2G6,TF,FKBP1B,PRKCE,COMMD1,PRNP,TTC7A,JAK2,EDNRB,EPHX2,GRIK2,TRDN,NDFIP1,ATP6V0D1,ATP6V0D2,IBTK,TRPV4,TRPM7,TRPM1,INPP4B,ATP6V1C2,ATP6V1G2,ATP6V1G1,ATP6V1E1,ATP6V1E2,CALM1,SRI,ARF1,ABL1,GDF2,DIAPH1,PTK2B,TPT1,HIF1A,ATP7B,GNG3,CCL21,CCL19,SLC40A1,IRE…	BTBD9,CACNB4,MTSS1,ATG5,NEU1,TBXA2R,ADRA1A,SCN7A,SCNN1G,SCNN1B,SCNN1A,GCK,FTL,C5AR1,SFXN3,SFXN4,SFXN1,SFXN2,SFXN5,STEAP3,STEAP4,PDPK1,FXN,STEAP2,STEAP1,MON1A,AVPR2,NEO1,SLC25A23,SLC25A28,SLC25A27,SLC25A37,CAMK2D,HFE,SYPL2,NUBP1,CYBRD1,XCL1,NR3C2,VAPB,SNCA,AP3D1,ITPR3,ITPR1,WFS1,FTH1,SLC30A4,SLC30A2,SLC30A3,SLC30A7,PTPN6,SCARA5,BDH2,PTPRC,AGTR1,CCR10,F2,RIC3,OPRM1,HYAL2,C7,C5,OPRL1,CP,CXCL11,CXCL1…	-0.471959	3.10244e-05	0.00247888
cellular response to nitrogen compound(GO:1901699)	513	1144	103	16346	0.63	410	41561	0.98	FRS2,LRRK2,GCK,NR1H4,FYN,GFPT1,IPO5,ADCY3,ADCY4,ADCY1,ADCY2,SNCA,ADCY6,ITPR2,KLF5,MBD5,GHRHR,RRAGA,PRKCQ,IGFBP1,JAK2,ENPP1,ZCCHC11,SLC6A4,USF1,ATP6V0D1,ATP6V0D2,FOXO1,RPS6,TBC1D4,MZB1,AQP1,GAB1,RAPGEF2,ATP6V1C2,ADAM17,CAB39L,ATP6V1G2,ATP6V1G1,ATP6V1E1,ATP6V1E2,CRK,MAPK8,ARG1,ABL1,DENND4C,DIAPH1,LIN28A,HTR1B,SLC2A8,COL1A2,LPIN1,COL3A1,PDGFC,SREBF1,CTNNB1,GNG3,CTNNA1,RPS6KB1,HCN1,PXN,SMAD1,EIF4G1,F…	PARP1,GHR,CFTR,ATRX,FRS2,LRRK2,HDAC5,HDAC9,PAX6,GCK,PPAT,NR1H4,CPEB2,CPEB3,CPEB4,PDPK1,FYN,GFPT1,MDM2,AP3S1,ARHGEF2,FFAR3,GNG13,GNG11,GNG12,MAS1,GNG10,MAVS,IPO5,PPM1A,SH2B2,ADCY3,ADCY4,ADCY1,ADCY2,ADCY7,ADCY8,ADCY5,SNCA,ADCY6,BDNF,ADAR,NFKB1,ITPR2,ADCY9,SOCS2,WT1,PTPN6,PTPN2,MUL1,PTPN1,PAK1,DROSHA,PTPRE,PTPRA,OPRM1,ACSL6,STRADA,STRADB,IDE,MTUS1,PRKRA,CYBA,KLF5,GHSR,KLF1,KLF4,KLF3,MBD5,MB21D1,TH,S…	-0.448249	3.25967e-05	0.00252308
regulation of proteolysis(GO:0030162)	500	1336	100	16349	0.61	400	41571	0.95	TFPI,BCL10,LRRK2,HDAC2,PAX2,XDH,UFL1,SNCA,CYR61,SUMO1,SOCS5,CYCS,EPHA7,TRIAP1,TF,CYFIP2,COMMD1,NDUFA13,BBS7,JAK2,SOX7,PSME1,PSME4,CYTB,C4A,ACER2,USP14,CSNK1E,FBXW7,PLAT,BID,AKIRIN2,BCL2L13,ATRAID,AQP1,SFN,CLU,TNFRSF1B,NLE1,TPD52L1,PTK2B,UCHL5,CASP8AP2,ACVR1C,SPOCK1,EIF2AK3,CDKN2A,CDKN2D,DYX1C1,CDKN1B,UBXN1,OPHN1,NOD1,RPS6KA1,TRADD,RFWD2,KIAA0141,DHCR24,FASLG,SERPINE3,SERPINI2,SERPINA5,SERPINA3,SE…	TFPI,ANP32B,AIFM1,NLRC4,BCL10,FADD,LRRK2,BEX3,HDAC2,HDAC6,PAX2,NELL1,PIAS1,NR1H2,XBP1,FBLN1,FN1,NLRP3,NLRP1,MDM2,PARK7,HGF,XDH,PPM1F,UFL1,SNCA,CYR61,SUMO2,SUMO1,MEFV,CST9L,WFS1,SOCS4,SOCS5,TFAP4,AXIN1,PTPN3,MUL1,MEN1,PAK2,GPI,PCID2,F3,F2,WNT9A,C3,C5,PCOLCE,IDE,NR4A1,CYCS,IFI16,HIP1,EPHA7,KLF4,TRIAP1,TF,WFIKKN1,BIRC6,BIRC3,BIRC2,SNX9,MTCH1,CYFIP2,SORL1,UBE2K,COMMD1,NGFR,HRG,DLC1,NDUFA13,KCNE2,FBXW…	-0.453058	3.22099e-05	0.00252308
generation of precursor metabolites and energy(GO:0006091)	453	1197	89	16360	0.54	364	41607	0.87	ATP6,EPM2AIP1,ADRA1B,ACADM,UGP2,GCK,MDH1,GFPT1,ATP5A1,SLC25A25,SLC25A14,SLC25A13,HK1,ATP5J2,ACOX1,FASTKD3,ADCY3,ADCY4,ADCY1,ADCY2,SNCA,ADCY6,ITPR2,ADPGK,KDELR3,ACSM1,CYCS,AGPAT1,NDUFA13,NDUFA12,ENPP1,PFKFB3,PFKFB2,PPP1CB,KCNS3,MSH2,SNAP25,GBE1,GBAS,DLST,HKDC1,COX6A1,CALM1,PNPT1,IER3,PCDH12,XYLB,POMC,IGF1,SDHC,HIF1A,STXBP1,COX10,ATP5O,GNG3,NFATC4,NFATC3,NCOR1,PPARD,AKAP5,COX1,NDUFS2,NDUFS1,TBRG4,C…	ATP6,PPP1CA,PASK,EPM2AIP1,HDAC4,ADRA1B,ACADM,GAA,UGP2,GCK,IL6ST,ATP5C1,MDH2,MDH1,FXN,NR1D1,GFPT1,GFPT2,ATP5A1,SLC25A25,SLC25A23,SLC25A27,SLC25A12,PPIF,SLC25A14,SLC25A13,PARK7,SDHAF2,ACO2,HK2,GNG13,HK1,GNG11,GNG12,HK3,ACLY,GNG10,ATP5J2,ACOX1,ACADVL,ATP5F1,GYG2,GYG1,FASTKD3,ADCY3,ADCY4,FASTKD1,ADCY1,FASTKD2,ADCY2,ADCY7,ADCY8,ADCY5,SNCA,ADCY6,BDNF,FASTKD5,GYS1,GYS2,ITPR3,ITPR1,ITPR2,ADCY9,ADPGK,ENO2…	-0.475088	3.2747e-05	0.00252308
organophosphate biosynthetic process(GO:0090407)	565	1658	116	16333	0.71	449	41522	1.07	ATP6,GALR3,UGP2,DHFR,GFPT1,ATP5A1,SLC25A13,ATP5J2,ATP5G2,ATP5G3,ADCY3,ADCY4,ADCY1,ADCY2,SNCA,ADCY6,NIF3L1,MC1R,AGPAT1,PLA2G6,GHRHR,ADCYAP1R1,HADHA,HADHB,LCLAT1,EDNRB,CMPK2,GARS,GART,GNPNAT1,ADORA2B,CAD,TK2,GBAS,PLEK,PLBD1,PLS1,APOA2,DHODH,INPP4B,GPCPD1,AQP1,SERINC5,SERINC1,CALM1,ARF1,ARF3,PMM2,GRM2,LTB4R2,HTR1B,NME5,NME2,NME1,MTHFD1,PTK2B,DPM2,KYNU,LPIN1,PRPSAP1,PRPSAP2,MTMR6,GPAT3,ATP5O,PDGFB,CH…	ATP6,ADSL,ADSS,GALR3,ISYNA1,IMPDH1,UGP2,ATIC,PPCS,ATP5C1,PPAT,DHFR,AVPR2,GFPT1,GFPT2,ATP5A1,SLC25A13,SPHK2,ASPDH,MAS1,ACHE,ATP5J2,PIP5K1B,PIP5K1C,PIP5K1A,IPMK,ATP5G2,ATP5G3,ATP5F1,ADCY3,ADCY4,ADCY1,ADCY2,ADCY7,ADCY8,ADCY5,SNCA,ADCY6,PALM,NIF3L1,NFS1,HPRT1,ADCY9,PHOSPHO1,SGMS2,SGMS1,MC1R,GK,OPRM1,PGAP3,PGAP2,PGAP1,MTMR14,ACSL3,ACSL6,ABCA1,MPPE1,UXS1,COASY,CHKA,CHKB,AGPAT5,AGPAT4,AGPAT3,AGPAT1,G6PD…	-0.420397	3.4001e-05	0.00257658
positive regulation of apoptotic process(GO:0043065)	411	912	79	16370	0.48	332	41639	0.79	AIFM2,PAWR,STEAP3,CAMK2A,ARHGEF4,ARHGEF6,BNIP3L,SNCA,CYR61,EPHA7,JMY,UNC5C,RASGRF2,JAK2,DNM1L,GRIK2,TGFB3,TGFB2,DCUN1D3,PNMA2,BID,FOXO1,RPS6,DNM2,SPDEF,DHODH,DCC,RAPGEF2,AKAP13,CLU,HOXA5,GRIN2A,MAPK8,TP73,TFAP2A,ABL1,CDKN2A,STK17A,MMP9,CTNNB1,RPS6KA2,TRADD,BMP7,FASLG,MOAP1,FGD4,NFATC4,PPARG,ZNF622,APOPT1,ANO6,ATM,RIPK1,ALOX12,GSK3B,IL10,RPS27A,CD40,RGCC,TRIM35,APC,KLF11,RHOB,NCOA1,APH1B,SLIT2,SAP…	TFPT,AIFM2,AIFM1,ARHGEF18,ARHGEF16,ARHGEF17,ARHGEF12,ARHGEF11,CTNNBL1,NLRC4,ATG7,NET1,FADD,PAWR,PRMT2,FRZB,FAF1,PIAS4,STEAP3,EEF1E1,EEF1A2,PPID,CAMK2A,ARHGEF4,ARHGEF3,ARHGEF2,ARHGEF7,ARHGEF6,ARHGEF9,BNIP3L,VAV3,VAV2,VAV1,NR3C1,SNCA,HCAR2,CYR61,FNDC1,NEUROD1,TFAP4,WT1,MEN1,PAK3,MELK,IL12A,NR4A1,S100B,ID3,NSMAF,EPHA7,BCL6,SOD1,APBB2,TSPO,ZC3H8,MTCH1,PRKCI,NGFR,PRKDC,HRG,NGEF,IRF5,MAGED1,JMY,PLEKHG2…	-0.5021	3.43965e-05	0.00257658
histone modification(GO:0016570)	389	1018	74	16375	0.45	315	41656	0.75	JDP2,ATF2,HDAC3,HDAC2,PRMT7,PRMT8,VRK1,CAMK2D,SNCA,TAF6L,MBIP,PRKD1,MTA2,HDAC11,CDC73,JAK2,RBM14,MSL3,SETMAR,ELP3,SETD3,USP21,USP22,DTX3L,RCOR1,TAF5,TAF7,ARID4A,USP3,SET,TAF5L,MAPK8,TAF10,WDR61,LOXL2,LPIN1,SREBF1,SETDB2,HSF4,AURKA,PRDM2,NCOR1,CHEK1,KANSL2,JMJD6,MAP3K7,ATM,EZH2,BRD8,ZNF335,TRIM16,SMARCA4,KAT6A,BRCA2,EP400,CDK9,NCOA1,NCOA2,NCOA3,SUPT7L,CDYL,YEATS2,ASXL2,YEATS4,EHMT2,NAA50,FLCN,EYA2…	JDP2,ATG5,ATG7,MEAF6,ATF2,HDAC5,HDAC4,HDAC3,HDAC2,HDAC1,HDAC9,HDAC8,HDAC7,HDAC6,PRMT3,PRMT1,PRMT2,PRMT7,PRMT8,PRMT5,PRMT6,CUL4B,BAZ1B,VRK1,BAZ2A,JARID2,PYGO2,TET2,TET3,CAMK2D,ATXN7,CLOCK,PPM1F,SNCA,TAF6L,ENY2,COPRS,SATB1,PAF1,MEN1,CRTC2,MUC1,MTF2,BCOR,MBD3,BCL6,MBIP,SNW1,DNMT1,PRKCA,UBE2A,UBE2B,PRKCB,UBE2N,PRKD1,PRKD2,IRF4,TCF3,MTA2,HDAC10,HDAC11,NIPBL,UIMC1,CDC73,CHD5,JAK2,SMYD3,SMYD2,ACTL6A,RBM…	-0.514818	3.46357e-05	0.00257658
response to nutrient levels(GO:0031667)	360	594	67	16382	0.41	293	41678	0.7	HIGD1A,BCL10,NEU1,PAX2,ACADM,ACADS,GCK,ACAT1,NR1H4,SLC25A25,LARP1,LZTS1,C2,ATG2B,FKBP1B,PICK1,BCHE,CADPS2,BBS4,ABCG8,ABCG5,SLC6A4,PSPH,USF1,SNAP29,IL15RA,BMPR2,FOXO1,DHODH,TM9SF1,ARG1,IFT88,RNF5,ADIPOR2,KYNU,ASNS,POMC,CDKN2B,CDKN2D,RRP8,SREBF1,RPS6KB1,ALDH3A1,BMP7,SLC27A4,SERPINC1,PPARD,PPARG,MKKS,HSPA5,CPS1,SLC22A3,TRIM13,IL15,BCKDHB,NCOA1,EGR1,MAX,RAB1A,ZEB1,CASR,PMAIP1,ULK1,ULK2,FSTL1,CHMP1A,C…	HIGD1A,NUAK2,ATG5,ATG7,BCL10,NEU1,ATG3,TBXA2R,HDAC6,PAX2,ACADM,ACADS,GCK,ACAT1,NR1H4,CPEB4,SLC16A1,SLC25A25,LARP1,MDM2,HFE,ATG9B,ATG9A,ATG4C,ATG4B,BDNF,MED1,NRBP2,ENSA,WRN,GSS,GSN,BDH1,F7,OPRM1,LZTS1,ACSL1,C2,ACSL4,ACSL3,ACSL6,CXCL10,VAMP8,ABCA1,IFI16,CYBA,CYBB,GHSR,ATG2B,ATG2A,G6PC,G6PD,ATG12,ATG14,ATG13,TH,FKBP1B,CYP27B1,SOD1,SOD2,TSPO,PICK1,BCHE,SNW1,CADPS2,MTOR,SLC18A2,IGFBP2,HMGCS1,ADCYAP1,B…	-0.54169	3.58689e-05	0.00263799
covalent chromatin modification(GO:0016569)	393	1039	75	16374	0.46	318	41653	0.76	JDP2,ATF2,HDAC3,HDAC2,PRMT7,PRMT8,VRK1,CAMK2D,SNCA,TAF6L,MBIP,PRKD1,MTA2,HDAC11,CDC73,JAK2,RBM14,MSL3,SETMAR,ELP3,SETD3,USP21,USP22,DTX3L,RCOR1,TAF5,TAF7,ARID4A,USP3,SET,TAF5L,MAPK8,TAF10,WDR61,LOXL2,LPIN1,SREBF1,SETDB2,HSF4,AURKA,PRDM2,NCOR1,CHEK1,KANSL2,JMJD6,MAP3K7,ATM,EZH2,BRD8,ZNF335,TRIM16,SMARCA4,KAT6A,BRCA2,EP400,CDK9,NCOA1,NCOA2,NCOA3,SUPT7L,CDYL,YEATS2,ASXL2,YEATS4,EHMT2,NAA50,FLCN,EYA2…	JDP2,ATG5,ATG7,MEAF6,ATF2,HDAC5,HDAC4,HDAC3,HDAC2,HDAC1,HDAC9,HDAC8,HDAC7,HDAC6,PRMT3,PRMT1,PRMT2,PRMT7,PRMT8,PRMT5,PRMT6,CUL4B,BAZ1B,VRK1,BAZ2A,JARID2,PYGO2,TET2,TET1,TET3,CAMK2D,ATXN7,CLOCK,PPM1F,SNCA,TAF6L,ENY2,COPRS,SATB1,PAF1,MEN1,CRTC2,MUC1,MTF2,BCOR,MBD3,BCL6,MBIP,SNW1,DNMT1,PRKCA,UBE2A,UBE2B,PRKCB,UBE2N,PRKD1,PRKD2,IRF4,TCF3,MTA2,HDAC10,HDAC11,NIPBL,UIMC1,CDC73,CHD5,JAK2,SMYD3,SMYD2,ACTL6…	-0.510885	3.76077e-05	0.0027348
anion transport(GO:0006820)	486	1357	97	16352	0.59	389	41582	0.93	CACNB4,SLC3A2,NEU1,SLC25A32,SLC25A13,SLC25A15,SLC4A7,SNCA,VDAC2,VDAC3,XK,BDKRB2,TRIAP1,PLA2G6,PLA2R1,SLC5A6,PQLC2,SLC6A12,SLC6A13,ENPP1,ABCG8,ABCC3,ABCC2,ABCC5,SLC17A8,ATP8A2,ROS1,SNAP25,GRIK1,CA7,CA3,CA2,CA1,APOA2,AQP1,SERINC5,SERINC1,TRPC4,MYO6,ARG1,SLC1A4,SLC1A7,CLCN2,GRM2,HNF1A,TMEM30A,STXBP1,SLC4A10,SCP2,SLC27A2,SLC27A5,SLC27A4,CA13,CA12,SLC38A7,SLC38A6,NPC2,LDLR,CLIC1,CLIC5,NCOR1,PPARD,PPAR…	CACNB4,KISS1R,SLC3A2,CFTR,NEU1,ABCB11,SFXN5,SLC16A3,SLC16A2,SLC16A5,SLC16A4,SLC16A7,SLC16A6,SLC25A20,SLC16A1,SLC25A24,SLC25A22,SLC25A26,SLC25A32,SLC25A12,SLC25A11,SLC25A13,SLC25A10,SLC25A15,SLC25A17,SLC25A42,ADAMTS8,SLC4A8,SLC4A7,SLC4A9,SLC51B,SLC51A,HBB,SNCA,SLC26A10,SLC26A11,BDNF,ABCC11,SLC15A4,SLC4A2,SLC4A4,SLC4A3,SLC4A5,SCARB1,GLS,VDAC2,VDAC3,VDAC1,ACSL1,ACSL4,ACSL3,ACSL6,ABCA7,ABCA1,TTYH3,TT…	-0.455551	3.87279e-05	0.00275254
regulation of establishment of protein localization(GO:0070201)	439	1106	86	16363	0.52	353	41618	0.84	LRRK2,WWP2,PPIA,ITGB1BP1,TONSL,EXPH5,STXBP5L,IPO5,PPM1B,PARL,KPNA1,AR,PPP3CC,JAK2,RBM22,CD276,CD274,DNM1L,NFKBIA,SNAP25,TGFB3,TGFB2,NDFIP1,NDFIP2,BID,KCTD7,APOA2,TEK,GAPVD1,SFN,SRI,SRGN,RAMP3,MAPK8,MAPK7,ABL1,PPFIA1,UHMK1,IFNAR1,LYPLAL1,IGF1,CDKN2A,TMEM30A,CCL19,CHRM1,SMAD4,BMP7,KIF5B,YWHAQ,AKAP6,ERBB4,ANK3,GOPC,JUP,TRIM16,TRIM28,GSK3B,IL10,CD40,RGCC,HCLS1,CD14,SP100,XPO4,ZIC1,RHOQ,CDH1,LDLRAP1,E…	PARP1,ANP32B,ARHGEF16,ATG5,LRRK2,HDAC6,FAF1,WWP2,C5AR2,NR1H2,NR1H3,MDFI,PDPK1,LYPLA1,PPIA,PPID,NLRP3,NLRP1,ITGB1BP1,MDM2,PBLD,TONSL,PARK7,BMPR1A,SMN1,FFAR4,EXPH5,SLC51B,MAVS,ACHE,TLR10,STXBP5L,IPO5,PPM1A,PPM1B,MBTPS1,PARL,MED1,FNDC1,AXIN2,AXIN1,KPNA1,CRTAM,GOLPH3L,OPRM1,HYAL2,AR,PKDCC,C5,PPP3CC,ACSL3,CIB1,VAMP7,VAMP4,EPHA2,BCL3,CHP2,CHP1,SNX3,MTOR,SORL1,PRKCI,PRKCZ,IRF3,MYO18A,LATS1,FBXW11,CDC42,…	-0.478611	3.91276e-05	0.00275254
peptidyl-tyrosine phosphorylation(GO:0018108)	293	843	52	16397	0.32	241	41730	0.57	LRRK1,FYN,CAMKK2,SOCS5,EPHB3,EPHA5,EPHA7,SNX6,PRKCE,YES1,MERTK,JAK2,ITK,ROS1,EREG,FBXW7,BLK,IBTK,TEK,TEC,EFEMP1,ADAM17,ABI2,ABL1,CLK1,PTK2B,IGF1,PDGFB,PDGFC,KITLG,PXN,AFAP1L2,GPRC5B,ERBB4,THBS4,MLK4,CSF2,AXL,LRP8,IL15,PTK2,DYRK1A,CD40,HCLS1,DDR1,MAP2K3,FLT1,FLT3,SAMSN1,ANGPT1,INSR,DYRK2	ZAP70,ERRFI1,GHR,LRRK1,IL6ST,BAZ1B,NEK1,FYN,PECAM1,MST1R,HGF,ARHGEF2,MATK,TWF1,HCK,FCER1A,CAMKK2,SOCS4,SOCS5,PTPN6,PTPN2,PAK2,MELK,PTPRC,HYAL2,PKDCC,IL12A,EPHB3,EPHB4,EPHB1,EPHB2,EPHA1,EPHA2,EPHA3,EPHA5,EPHA4,EPHA7,EPHA8,SNX6,PEAK1,MTOR,PRKCA,PRKCE,PRKCD,PRKCZ,HRG,YES1,PRLR,HPX,PPP2CA,WEE1,SEBOX,MERTK,JAK1,JAK2,JAK3,ADORA1,ITK,BTK,ROS1,SCYL1,ROR1,GAS6,EREG,TXK,MLST8,ARRB2,IL12RB2,FBXW7,IL12RB1,CC…	-0.599431	3.84544e-05	0.00275254
positive regulation of programmed cell death(GO:0043068)	418	923	81	16368	0.49	337	41634	0.8	AIFM2,LRRK2,PAWR,STEAP3,CAMK2A,ARHGEF4,ARHGEF6,BNIP3L,SNCA,CYR61,EPHA7,JMY,UNC5C,RASGRF2,JAK2,DNM1L,GRIK2,TGFB3,TGFB2,DCUN1D3,PNMA2,BID,FOXO1,RPS6,DNM2,SPDEF,DHODH,DCC,RAPGEF2,AKAP13,CLU,HOXA5,GRIN2A,MAPK8,TP73,TFAP2A,ABL1,CDKN2A,STK17A,MMP9,CTNNB1,RPS6KA2,TRADD,BMP7,FASLG,MOAP1,FGD4,NFATC4,PPARG,ZNF622,APOPT1,ANO6,ATM,RIPK1,ALOX12,GSK3B,IL10,RPS27A,CD40,RGCC,TRIM35,APC,KLF11,RHOB,NCOA1,APH1B,SLI…	TFPT,AIFM2,AIFM1,ARHGEF18,ARHGEF16,ARHGEF17,ARHGEF12,ARHGEF11,CTNNBL1,NLRC4,ATG7,NET1,FADD,LRRK2,HDAC6,PAWR,PRMT2,FRZB,FAF1,PIAS4,STEAP3,EEF1E1,EEF1A2,PPID,CAMK2A,ARHGEF4,ARHGEF3,ARHGEF2,ARHGEF7,ARHGEF6,ARHGEF9,BNIP3L,VAV3,VAV2,VAV1,NR3C1,SNCA,HCAR2,CYR61,FNDC1,NEUROD1,TFAP4,WT1,MEN1,PAK3,MELK,IL12A,NR4A1,S100B,ID3,NSMAF,EPHA7,BCL6,SOD1,APBB2,TSPO,ZC3H8,MTCH1,PRKCI,NGFR,PRKDC,HRG,NGEF,IRF5,MAGED1…	-0.492045	4.01884e-05	0.00279677
blood vessel development(GO:0001568)	563	1090	116	16333	0.71	447	41524	1.07	SGPL1,ITGB1BP1,HS6ST1,SULF1,DDAH1,PTPRJ,XDH,TSPAN12,TBX20,NR2F2,CYR61,EPHB3,KLF5,TF,PLXND1,PRKD1,CHD7,TBX3,TBX5,EREG,TGFB2,BMPR2,FBXW7,WARS,APOB,HIF1AN,SEMA3E,FOXO1,BMPER,ARID1A,TEK,HEY2,AQP1,RAPGEF2,HOXA1,HOXA3,HOXA5,HOXA7,MAPK7,GDF2,PTK2B,COL1A2,LOXL2,ACVR1,ENG,ACVR2B,PLCD1,AMOT,HIF1A,THSD7A,ZFPM2,COL3A1,PDGFB,ARHGAP22,PGF,CTNNB1,CHRNA7,BMP7,GTF2I,FASLG,RAE1,FGF9,NFATC4,NFATC3,ETS1,GATA6,ROBO1,…	PARVA,DHCR7,NR2E1,HDAC5,TBXA2R,ADM2,HDAC9,HDAC7,PAX6,SGPL1,SASH1,ZFP36L1,MEOX2,EMP2,FN1,ITGB1BP1,ZMIZ1,TIPARP,HS6ST1,SULF1,DDAH1,PTPRJ,PTPRM,SPHK2,HGF,NRCAM,XDH,ANGPTL6,ANGPTL3,ANGPTL4,VAV3,VAV2,TSPAN12,ADD1,TBX20,NR2F2,CYR61,MED1,WT1,NFE2,PTPRB,GPI,F3,HYAL1,C3,C6,C5,C1GALT1,CXCL12,CXCL10,CIB1,PRCP,NR4A1,CXCL17,ID1,EPHB3,EPHB4,EPHB1,EPHB2,KLF5,EPHA1,EPHA2,KLF4,TF,MTDH,PLXND1,PRKCA,PRKCB,PRKD1,PRK…	-0.415884	4.07214e-05	0.00280371
immune effector process(GO:0002252)	552	1490	113	16336	0.69	439	41532	1.05	BCL10,AP2M1,IL10RB,FYN,APOBEC3H,APOBEC3C,BNIP3L,PPM1B,FCER1G,ITPR2,SOCS5,C2,PLA2G6,PRF1,CYFIP2,PRKCE,YES1,IRF9,IRF1,XRCC4,ZBTB1,AP1G1,AP1M2,ABCF3,MSH6,MSH2,C4A,ELMO2,ELMO1,TGFB3,TGFB2,ADORA2B,MYO1G,MYO10,APLF,WASL,NDFIP1,KCTD7,FOXJ1,IL2RA,PLS1,RPS6,APOA2,TEK,MZB1,CFH,CFB,LGALS1,ACTR3,ACTR2,ADAM17,CLU,CR2,CRK,ARF1,ABL1,BTN3A3,BTN3A2,PTK2B,WASF2,C10orf54,IFNAR1,FCGR3A,GPR183,RC3H2,GNL1,RC3H1,IFNW1,…	AP2S1,TICAM1,NLRC5,ATG5,BCL10,FADD,IFITM1,IFITM2,IFITM3,AP2M1,SLA2,ADARB1,SASH3,PDPK1,IL10RB,AP2A2,AP2A1,FYN,APOBEC3H,APOBEC3C,NLRP3,HFE,HLX,FFAR3,NLRX1,BNIP3L,PGLYRP2,MAVS,VAV3,VAV2,VAV1,XCL1,IFI44L,PPM1B,TSPAN32,HCK,SAMHD1,FCER1G,FCER1A,ADAR,TBX21,ITPR3,ITPR1,ITPR2,SOCS5,PTPN6,MUL1,PAK2,PAK1,PTPRC,CRTAM,HYAL2,IL12A,C7,C9,C3,C6,C5,PPP3CB,C2,CXCL10,VAMP7,IFI16,MB21D1,PLA2G6,PRF1,FUT7,BCL3,BCL6,BI…	-0.424019	4.12399e-05	0.00280952
protein maturation(GO:0051604)	422	1033	82	16367	0.5	340	41631	0.81	LRRK2,HDAC2,AFG3L2,XDH,TSPAN15,SNCA,SUMO1,SOCS5,C2,CYCS,TF,FKBP1B,CYFIP2,IMMP2L,BBS7,JAK2,CYTB,C4A,ACER2,CSNK1E,FBXW7,PLAT,BID,SPCS3,BCL2L13,ATRAID,CFH,CFB,CLU,SRGN,TNFRSF1B,IFT88,CLN5,ASPG,PLGRKT,POMC,CASP8AP2,EIF2AK3,CDKN2A,CDKN1B,UBXN1,OPHN1,NOD1,RPS6KA2,TRADD,RFWD2,IFT172,DHCR24,FASLG,SERPINA5,C4BPB,C4BPA,AURKA,PPARG,ROBO1,TYSND1,PPP1R9A,BAG5,BAG6,TSG101,RIPK1,GSK3B,RPS27L,IL10,RPS27A,NRDC,CD…	PARP1,ANP32B,AIFM1,NLRC4,FADD,LRRK2,BEX3,HDAC2,HDAC6,NELL1,PIAS1,NR1H2,AFG3L2,FXN,XBP1,TESC,NLRP3,NLRP1,MDM2,PARK7,ADAMTS2,XDH,TSPAN33,TSPAN14,TSPAN15,ACE2,SNCA,SUMO2,SUMO1,WFS1,SOCS4,SOCS5,AXIN1,PTPN3,MUL1,F3,F2,C7,C9,C3,C6,C5,C2,PRSS12,IDE,CYCS,IFI16,KLK6,HIP1,TF,FKBP1A,FKBP1B,OMA1,SNX9,MTCH1,CYFIP2,SORL1,IMMP2L,LDLRAD3,IMMP1L,LMF1,HPN,DLC1,KCNE2,FBXW11,BBS7,SEBOX,CORIN,JAK2,APAF1,OSBPL7,BBC3,K…	-0.488648	4.34831e-05	0.00293149
regulation of inflammatory response(GO:0050727)	212	548	34	16415	0.21	178	41793	0.42	ACP5,FCER1G,AGTR1,C2,JAK2,EDNRB,PSMA6,CD276,SETD6,C4A,ADORA2B,NDFIP1,KCTD7,IL2RA,TEK,CFH,CFB,TNFRSF1B,MAPK7,IL17RA,IER3,SERPINC1,C4BPB,C4BPA,MYD88,PPARD,PPARG,GPX2,GPRC5B,IL15,IL10,CD55,MVK,CALCRL	GBA,IL6ST,NR1H3,NR1D2,TNIP1,NLRP3,NLRP1,PARK7,ACP5,CLOCK,FFAR4,FFAR3,NLRX1,MAS1,PGLYRP2,TLR10,XCL1,HCK,ACE2,FCER1G,FCER1A,NFKB1,MEFV,PTPN2,AGTR1,MCPH1,HYAL2,C7,C9,C3,C6,C5,C2,GHSR,KLF4,PLA2G7,BCL6,BIRC3,BIRC2,ZYX,PRKCA,PRKCD,ADCYAP1,MTA1,SEBOX,JAK2,ADORA3,ADORA1,EDNRA,EDNRB,SHARPIN,PSMA6,WNT5A,PSMB4,CD276,SETD6,RORA,FOXF1,C4A,KLKB1,C8A,C8B,ADORA2B,APOD,APOE,SEMA7A,BCR,NDFIP1,KCTD7,IL2RA,MASP1,IL1…	-0.72089	4.49377e-05	0.00299831
glycerolipid metabolic process(GO:0046486)	349	910	65	16384	0.4	284	41687	0.68	PIP5KL1,AGPAT1,PLA2G6,HADHA,HADHB,ELOVL4,ELOVL2,LCLAT1,ENPP2,PPP1CB,FBXW7,APOB,PLEK,PLBD1,PLS1,DAGLA,APOA2,INPP4B,DBI,GPCPD1,SERINC5,SERINC1,ARF1,ARF3,FAM135A,DPM2,LPIN1,CNEP1R1,INPP1,MTMR6,GPAT3,PDGFB,CHPT1,SREBF1,SLC27A5,PI4K2A,PIGK,PIGL,PIGF,PIGC,PIGV,PIGP,TNXB,LDLR,MBOAT2,CRLS1,CPS1,ATM,SLC22A4,PIK3C2G,LCAT,PIP4K2A,PEMT,SLC44A1,SLC44A2,SLC44A4,SLC44A5,INSIG2,CDS2,PIK3CB,PLA2G16,PLA2G15,DGAT2,…	PIP5KL1,PPP1CA,NR1H2,NR1H3,CTDNEP1,ACP6,ACLY,TECR,ACHE,SMG1,PIP5K1B,PIP5K1C,PIP5K1A,PHOSPHO1,SCARB1,GK,PGAP3,PGAP2,PGAP1,MTMR14,C3,ACSL1,ACSL4,ACSL3,ACSL6,ACSL5,MTTP,MPPE1,CHKA,CHKB,AGPAT5,AGPAT4,AGPAT3,AGPAT1,G6PC,PLA2G6,PLA2G5,ATG14,MOGAT3,MOGAT1,LMF1,MTM1,HADHA,HADHB,SYNJ1,SYNJ2,CPT1A,IMPAD1,ELOVL1,ELOVL5,ELOVL4,ELOVL2,ELOVL7,ELOVL6,LCLAT1,ENPP2,PPP1CC,PPP1CB,PLSCR1,FBXW7,CAT,APOB,APOE,APOF,AP…	-0.540703	4.59058e-05	0.00303166
proteolysis involved in cellular protein catabolic process(GO:0051603)	549	1470	113	16336	0.69	436	41535	1.04	LRRK2,WWP2,WWP1,ANAPC1,ANAPC4,ATXN3,ADAMTS7,UFL1,ERLEC1,SUMO1,KLHL3,SOCS5,MYLIP,TTC3,KLHL20,UBE2W,COMMD1,KLHL42,BBS7,RNF217,CDC23,PSMA2,PSMA6,PSMA3,PSMA7,PSMB7,PSMC6,PSMD2,PSMD7,PSME1,PSME2,PSME4,USP53,USP12,USP14,USP21,USP22,USP25,USP24,USP38,CSNK1E,USP46,USP43,USP45,FBXW7,HACE1,FBXL7,FBXL3,FBXO8,NDFIP1,UBA6,ERLIN1,ATRAID,USP7,USP8,USP3,CLU,MVB12B,RNF6,RNF5,ASB2,HECW1,FAP,PTK2B,UCHL5,UCHL3,LGMN,…	ENC1,LRRK2,HDAC6,CUL4A,CUL4B,FAF1,NELL1,WWP2,WWP1,ANAPC1,ANAPC2,ANAPC5,ANAPC4,PIAS1,ANAPC7,NR1D1,XBP1,SEC61B,MDM2,PARK7,ATXN3,ADAMTS7,NPLOC4,RLIM,CLOCK,LNX1,UFL1,ZRANB1,TBL1X,ERLEC1,PAN2,SUMO2,SUMO1,WFS1,KLHL3,KLHL8,SOCS6,SOCS4,SOCS5,ARNTL,AXIN1,BUB1B,MYLIP,FOXRED2,IDE,TTC3,BIRC2,TOM1L1,OMA1,KLHL20,UBE2A,UBE2I,UBE2H,UBE2C,UBE2B,UBE2N,UBE2K,UBE2W,COMMD1,UBE2S,UBE3A,UBE3C,KLHL42,UBE4A,UBE4B,PPP2CB,…	-0.417089	4.91073e-05	0.00316772
glycoprotein metabolic process(GO:0009100)	395	954	76	16373	0.46	319	41652	0.76	PARP4,PAWR,GFPT1,HS6ST1,SULF2,SULF1,GANAB,NAGPA,ST6GALNAC5,ST6GALNAC6,ST6GALNAC3,ST6GALNAC4,ST6GALNAC2,VCAN,FUT9,FUT8,PREB,MGAT5B,UGGT2,MGAT3,MGAT5,ACER2,GNPNAT1,EXTL1,HEXA,MAN1A1,DCN,MAN1C1,PMM2,ART4,DPM2,SEC23A,SEC31A,B3GNT9,UBE2J1,IGF1,PRKCSH,HIF1A,SDC1,STT3A,CTNNB1,CCL21,CCL19,B4GALT3,ALG1,ALG3,ALG5,B3GALT2,B3GALT1,PPARD,SIRT4,PDIA3,GALNT10,GALNT13,GALNT14,B3GAT3,PGM3,MLEC,HPSE,NCAN,SLC35C2,R…	EGFLAM,PARP3,PARP4,PARP1,PARP2,MANBA,NEU4,ST8SIA1,ST8SIA3,ST8SIA4,ST8SIA5,PAWR,GFPT1,GFPT2,TET2,TET1,TET3,TNIP1,TIPARP,HS6ST2,HS6ST1,CSGALNACT1,SULF2,CSGALNACT2,SULF1,ADAMTS9,POMGNT1,GANAB,NAGPA,EOGT,SLC51B,NGLY1,GPT,ST6GALNAC5,ST6GALNAC6,ST6GALNAC3,ST6GALNAC4,HYAL1,ST6GALNAC2,VCAN,C1GALT1,IDS,ABCA7,MUC1,MUC4,POGLUT1,FUT9,FUT8,FUT7,FUT6,FUT5,FUT4,FUT1,PREB,CHP1,TNKS2,CHPF,BCAN,SRD5A3,LMF1,POFUT2,…	-0.500742	5.01823e-05	0.00316772
leukocyte differentiation(GO:0002521)	383	815	73	16376	0.44	310	41661	0.74	LRRK1,FOS,SOCS5,IL7,ID2,CHUK,IRF1,XRCC4,ZBTB1,MERTK,CHD7,ITK,MSH2,VNN1,IL15RA,CA2,NDFIP1,FOXJ1,IL2RA,TESPA1,RPS6,INPP4B,LGALS1,ADAM17,OCSTAMP,HOXA7,CR2,SP3,ABL1,NME2,DCSTAMP,PTK2B,POLM,CDKN2A,SNX10,GPR183,MMP9,RC3H2,RC3H1,IFNW1,CTNNB1,IFNA5,GPR68,CCL19,IREB2,KITLG,PPP2R3C,BLNK,NCOR1,PPARG,ZNF683,RASSF2,BATF,JMJD6,ATM,RIPK1,CSF2,AXL,IL15,IL10,HLA-B,HCLS1,APC,PRDM16,FLT3,RIPK3,EGR1,ASXL2,INHBA,CASP…	SART1,ZAP70,PARP1,FADD,LRRK1,TFE3,HDAC5,HDAC4,HDAC9,CUL4A,SASH3,ZFP36L1,ZFP36L2,TMEM176B,TMEM176A,TESC,CBFA2T3,FOS,HLX,RPL22,PGLYRP2,TBX21,AP3B1,MED1,AP3D1,ITPKB,SATB1,SOCS5,PTPN6,PTPN2,PTPRC,PATZ1,OSTM1,IL12A,PPP3CB,IL7,IFI16,TNFSF9,TNFSF8,ID2,TPD52,KLF6,EPHA2,FUT7,BCL3,BCL6,SOD1,ZC3H8,CHUK,PRKCA,PRKCZ,PRKDC,L3MBTL3,GIMAP1,IRF7,IRF1,IRF4,XRCC4,TCF3,ZBTB1,JAG2,HHEX,MERTK,CDC42,CHD7,CREB1,JAK3,FAM…	-0.512364	4.85764e-05	0.00316772
negative regulation of kinase activity(GO:0033673)	207	460	33	16416	0.2	174	41797	0.41	ITGB1BP1,PTPRJ,NR2F2,SOCS5,ILK,MBIP,SNX6,DEPTOR,LATS2,PKIB,IBTK,TAF7,SFN,TP73,ABL1,PRPSAP1,CDKN2A,CDKN2B,CDKN2D,CDKN1B,WNK1,BMP7,SPRY4,SPRY2,SPRED2,RGS2,GSK3B,TRIB2,APC,DUS2,DNAJC3,CASP3,DAB2IP	ERRFI1,GBA,ADARB1,PDPK1,TESC,ITGB1BP1,PARK7,PTPRJ,HEXIM2,HEXIM1,PPM1F,PPM1E,ADAR,NR2F2,SOCS4,SOCS5,TFAP4,PTPN6,PTPN1,MEN1,PAK2,PTPRC,ILK,PRKRIP1,HYAL2,EPHA1,MLLT1,MBIP,CHP1,SNX6,IRAK3,SORL1,PRKCA,PRKCD,DEPTOR,LATS1,LATS2,PPP2CA,PRKAR2B,PRKAR2A,HHEX,PRKAR1B,PRKAR1A,SMYD3,CAMK2N2,CAMK2N1,MIDN,PKIG,PKIB,PKIA,APOE,FBXO7,MYOCD,IBTK,AKT1S1,TAF7,PLK1,TSC2,INPP5K,SFN,CSK,PIK3IP1,UBASH3B,TP73,ABL1,ADIPOQ,…	-0.72798	5.04133e-05	0.00316772
glycosaminoglycan metabolic process(GO:0030203)	155	369	22	16427	0.13	133	41838	0.32	HS6ST1,VCAN,ABCC5,KERA,HEXA,DCN,GUSB,CLTC,IGF1,SDC1,HAS3,PDGFB,B4GALT3,B3GAT3,HPSE,IL15,NCAN,LUM,XYLT1,ANGPT1,GALNT5,GCNT2	EGFLAM,LYVE1,AP2A1,HS6ST2,HS6ST1,CSGALNACT1,CSGALNACT2,NAGLU,HGF,PGLYRP2,NFKB1,GNS,HYAL1,HYAL2,HYAL3,VCAN,IDS,CHPF,BCAN,IMPAD1,ST3GAL1,ST3GAL3,ST3GAL2,ST3GAL4,ST3GAL6,GALNS,ABCC5,TGFB1,HS3ST5,HS3ST1,CHST12,CHST11,CHST13,CHST15,BGN,KERA,ITIH1,ITIH4,ITIH5,ITIH2,ITIH3,HEXA,HEXB,DCN,GUSB,EGF,ARSB,DSE,CLTC,CHST2,CHST3,CHST1,CHST7,CHST6,HGSNAT,CHSY3,CHSY1,CLN6,IDUA,GXYLT1,B3GNT4,B3GNT7,B3GNT3,UST,SPOCK…	-0.864428	4.97392e-05	0.00316772
nucleoside monophosphate metabolic process(GO:0009123)	582	1434	121	16328	0.74	461	41510	1.1	ATP6,ATF7IP,ATP5A1,SLC25A25,SLC25A13,MDN1,ATP5J2,ATP5G2,ATP5G3,SNCA,ABCA3,ABCB1,ABCB4,PICK1,XRCC3,XRCC2,ENPP1,ABCG8,ABCG5,ABCF1,ABCF3,ABCE1,ABCD4,ABCC3,ABCC4,ABCC1,ABCC2,ABCC5,ABCC6,PSMC6,MSH6,MSH3,MSH2,MSH5,MSH4,VPS4A,GART,SKIV2L,MYO10,CAD,DMC1,DDX17,DDX18,DDX10,TK2,GBAS,PLS1,DHODH,OLA1,ATP6V1G2,ATP6V1G1,PMS1,SWSAP1,GTF2H4,DDX23,DDX25,DDX24,DDX47,DDX49,DDX56,DDX51,POLQ,ATP13A1,ATAD2,TPM1,COX10,A…	ATP6,ADSL,ADSS,DHX8,DHX9,ATF7IP,CFTR,ATRX,IMPDH1,SNRNP200,ATIC,ABCB10,ABCB11,ATP5C1,PPAT,FXN,ATP5A1,SLC25A25,SLC25A23,PPIF,SLC25A13,MDN1,RALBP1,PARK7,SDHAF2,WRNIP1,ACLY,LONRF3,LONRF1,LONRF2,ATP5J2,ATP5G2,KIF9,ATP5G3,KIF7,KIF6,ATP5F1,SNCA,BDNF,ABCC11,ABCC10,YTHDC2,HPRT1,WRN,NDUFB10,TTF2,IDE,NDUFAB1,ABCA8,ABCA7,ABCA9,ABCA2,ABCA1,ABCA3,ABCA6,ABCA5,ABCB9,ABCB8,ABCB1,ABCB7,ABCB6,ABCB4,NDUFAF1,PICK1,UQ…	-0.404555	5.35729e-05	0.00327353
alcohol metabolic process(GO:0006066)	365	873	69	16380	0.42	296	41675	0.71	ACADL,NR1H4,SGPP2,SNCA,FDFT1,C14orf1,PLA2G6,BCHE,PPIP5K1,CYB5R2,ENPP6,ENPP2,EPHX2,ACER2,APOB,FDX1,PLEK,TTR,PLBD1,APOA2,INPP4B,DBI,CALM1,ALDH7A1,EBPL,DEGS2,HNF1A,PTK2B,DPM2,LPIN1,LGMN,NR0B2,PLCH1,INPP1,PLCD1,CYP46A1,IGF1,SNX17,CHPT1,SREBF1,ALDH2,COQ3,COQ2,SCP2,SMPDL3A,ALDH3A2,BMP5,DHCR24,NPC2,LDLR,PPARD,MBOAT2,GPD2,SMPD3,LCAT,PEMT,SLC44A1,SLC44A2,SLC44A4,SLC44A5,PEX2,INSIG2,LDLRAP1,PECR,PLA2G16,PL…	ACAA2,CFTR,DHCR7,GK5,ISYNA1,ACADL,ADH5,ADH6,ADH4,GBA,NR1H4,CYP39A1,SGPP2,GFI1,PARK7,SPHK2,MAS1,ACHE,ANGPTL3,IPMK,ACADVL,MBTPS2,IPPK,MBTPS1,SNCA,NUDT11,NFKB1,ITPKB,ITPKC,PHOSPHO1,TRERF1,SCARB1,SCARF1,GPT,SGMS2,SGMS1,GC,CYP2R1,GK,ACSL3,FDFT1,ABCA1,DHRS9,CYP3A4,C14orf1,CHKA,CHKB,G6PD,CYP27A1,PLA2G6,PLA2G5,CYP27B1,MOGAT3,MOGAT1,SOD1,ACSS2,ACSS1,BCHE,SLC5A3,SORL1,PPIP5K2,PPIP5K1,SRD5A3,PRKCD,LMF1,HMGC…	-0.522413	5.27411e-05	0.00327353
Ras protein signal transduction(GO:0007265)	335	911	62	16387	0.38	273	41698	0.65	RALGPS1,SPATA13,ADRA1A,CAMK2D,ARHGEF4,ARHGEF6,AGTR1,MAPKAPK5,MAPKAPK2,DNMBP,RFXANK,CHUK,PLEKHG3,PSD2,RASGRF2,FLOT1,ELMO1,HACE1,FBXO8,CNKSR1,KCTD7,ARAP3,RAPGEF2,AKAP13,USP8,ARHGAP6,ARHGAP5,CRK,ABI2,ABRA,SCAI,GRAP,MFN2,COL1A2,DENND1A,IGF1,CDKN2A,PREX2,COL3A1,LIMK1,KITLG,DHCR24,MAPKAP1,RALA,FGD5,FGD4,SPRY2,ECT2L,RAF1,FARP1,ROCK1,AIF1,CDC42EP1,IQSEC3,RHOB,ITSN2,ITSN1,CUL3,LPAR2,FLCN,ULK1,DAB2IP	ARHGEF40,RALGPS1,ARHGEF26,ARHGEF25,ARHGEF28,ARHGEF33,ARHGEF39,ARHGEF37,ARHGEF18,ARHGEF19,ARHGEF16,ARHGEF17,ARHGEF15,ARHGEF12,ARHGEF10,ARHGEF11,NET1,SPATA13,ARHGDIG,ARHGDIA,ADRA1A,SSX2IP,CAMK2D,STAMBP,PARK7,PECAM1,ARHGEF4,ARHGEF3,ARHGEF2,ARHGEF1,ARHGEF7,ARHGEF6,ARHGEF5,ARHGEF9,CTNNAL1,VAV3,VAV2,VAV1,SH2B2,ITPKB,MADD,AGTR1,MAPKAPK5,MAPKAPK3,ABCA1,MAPKAPK2,DNMBP,VANGL2,CELSR1,RIT1,RFXANK,BCL6,CHUK,N…	-0.548373	5.39385e-05	0.00327353
peptidyl-tyrosine modification(GO:0018212)	295	846	53	16396	0.32	242	41729	0.58	LRRK1,TPST1,FYN,CAMKK2,SOCS5,EPHB3,EPHA5,EPHA7,SNX6,PRKCE,YES1,MERTK,JAK2,ITK,ROS1,EREG,FBXW7,BLK,IBTK,TEK,TEC,EFEMP1,ADAM17,ABI2,ABL1,CLK1,PTK2B,IGF1,PDGFB,PDGFC,KITLG,PXN,AFAP1L2,GPRC5B,ERBB4,THBS4,MLK4,CSF2,AXL,LRP8,IL15,PTK2,DYRK1A,CD40,HCLS1,DDR1,MAP2K3,FLT1,FLT3,SAMSN1,ANGPT1,INSR,DYRK2	ZAP70,ERRFI1,GHR,LRRK1,IL6ST,BAZ1B,TPST1,NEK1,FYN,PECAM1,MST1R,HGF,ARHGEF2,MATK,TWF1,HCK,FCER1A,CAMKK2,SOCS4,SOCS5,PTPN6,PTPN2,PAK2,MELK,PTPRC,HYAL2,PKDCC,IL12A,EPHB3,EPHB4,EPHB1,EPHB2,EPHA1,EPHA2,EPHA3,EPHA5,EPHA4,EPHA7,EPHA8,SNX6,PEAK1,MTOR,PRKCA,PRKCE,PRKCD,PRKCZ,HRG,YES1,PRLR,HPX,PPP2CA,WEE1,SEBOX,MERTK,JAK1,JAK2,JAK3,ADORA1,ITK,BTK,ROS1,SCYL1,ROR1,GAS6,EREG,TXK,MLST8,ARRB2,IL12RB2,FBXW7,IL12…	-0.584487	5.41205e-05	0.00327353
chromatin modification(GO:0016568)	585	1527	122	16327	0.74	463	41508	1.1	JDP2,ATF2,HDAC3,HDAC2,PRMT7,PRMT8,JMJD1C,BAZ1A,VRK1,CAMK2D,MIS18BP1,SNCA,TAF6L,MBIP,PRKD1,MTA2,HDAC11,SMARCE1,CDC73,CHD9,CHD7,JAK2,RBM14,MSL3,SETMAR,ELP3,PSME4,SETD3,USP21,USP22,SYCP3,FOXA1,DTX3L,UBN1,BRE,RCOR1,RCBTB1,ARID1A,TAF5,TAF7,ARID4A,TDRD3,USP3,SET,EPC2,TAF5L,MAPK8,TAF10,ASF1A,C17orf49,WDR61,HNF1A,CECR2,LOXL2,LPIN1,DPF3,TERF2,CDKN2A,RRP8,SREBF1,SETDB2,HSF4,CENPO,CENPQ,CENPV,CENPW,HMGN3,AU…	ANP32E,ATRX,JDP2,ATG5,ATG7,MEAF6,ATF2,HDAC5,HDAC4,HDAC3,HDAC2,HDAC1,HDAC9,HDAC8,HDAC7,HDAC6,PRMT3,PRMT1,PRMT2,PRMT7,PRMT8,PRMT5,PRMT6,JMJD1C,CUL4B,BAZ1A,BAZ1B,VRK1,AEBP2,EMSY,BAZ2A,JARID2,PYGO2,TET2,TET1,TET3,SCMH1,CAMK2D,ATXN7,HMG20A,HMG20B,CLOCK,PPM1F,NR3C1,MIS18BP1,SNCA,TAF6L,ENY2,COPRS,SATB1,PAF1,MEN1,BAHD1,L3MBTL4,CRTC2,SPIN1,TTF1,MUC1,HIRA,MTF2,BCOR,KLF1,MBD3,MBD2,BCL6,MBIP,SNW1,DNMT1,PRKCA…	-0.40064	5.63391e-05	0.00337618
negative regulation of transport(GO:0051051)	338	767	63	16386	0.38	275	41696	0.66	NEU1,LRRK2,GCK,WWP2,ITGB1BP1,CAMK2D,TONSL,MAPT,STXBP5L,PPM1B,SNCA,LRRTM2,LRRTM1,FKBP1B,PRKCE,PRKD1,PLA2R1,SAR1A,ENPP1,ABCG8,ABCG5,NFKBIA,TRDN,NDFIP1,NDFIP2,KCTD7,TBC1D4,APOA2,MZB1,CALM1,SRI,SRGN,MAPK7,HTR1B,PTK2B,ACVR1C,LYPLAL1,STXBP6,WNK1,OXSR1,MMP9,SREBF1,BMP7,GSTO1,LRSAM1,SIRT4,GOPC,GSK3B,IL10,RGCC,SP100,NUP153,INHBA,RHBDF2,ANGPT1,ZNF268,P2RY12,DYRK2,CABP1,ANXA4,DAB2IP,BEST3,NFKBIL1	NEU1,LRRK2,GCK,FAF1,CTTNBP2NL,WWP2,C5AR2,NR1H2,NR1H3,MDFI,AVPR2,LYPLA1,PPIF,NLRP3,ITGB1BP1,PBLD,CAMK2D,TONSL,PARK7,ATXN2,MAOB,MAPT,FFAR4,STXBP5L,PPM1A,PPM1B,SNCA,NFKB1,AXIN2,PEA15,OPRM1,PKDCC,C5,LRRTM2,LRRTM1,PPP3CA,ACSL4,NDUFAF2,GHSR,FKBP1B,CHP1,SNX3,MTOR,PRKCA,PRKCE,PRKCB,PRKD1,PLA2R1,SLC18A2,ADCYAP1,LATS1,KCNH2,FBXW11,SAR1A,IRS1,KCNA5,HMOX1,DLG4,CREB3,ADORA1,ENPP1,ABCG8,ABCG5,CYLD,PSMD9,CYP4F2…	-0.539658	5.90202e-05	0.00348887
steroid biosynthetic process(GO:0006694)	145	336	20	16429	0.12	125	41846	0.3	NR1H4,FDFT1,C14orf1,CYB5R2,APOB,FDX1,HNF1A,STARD5,CYP46A1,SREBF1,SCP2,BMP5,DHCR24,SLC27A2,SLC27A5,HSD17B4,PEX2,INSIG2,ATP1A1,MVK	ACAA2,HSD11B1,CFTR,DHCR7,HINT2,ABCB11,NR1H4,CYP39A1,NR1D1,BLVRB,GFI1,ACBD3,ACOX2,NR3C1,NFKB1,MED1,TRERF1,SCARB1,CYP2R1,FDFT1,CYP3A4,UXS1,C14orf1,G6PD,CYP27A1,CYP27B1,SOD1,TSPO,SRD5A3,SRD5A1,PRLR,HMGCS1,HMGCS2,HSD3B7,MSMO1,CYB5R3,CYB5R1,CYB5R2,ABCG1,DKK3,APOB,APOE,FDX1,FDXR,IDI1,NSDHL,SNAI2,SNAI1,SQLE,MAT2B,FDPS,SF1,SEC14L2,GALE,SC5D,CYP7A1,PROX1,CYP7B1,PMVK,EBP,SCAP,CYP8B1,HNF1A,AMACR,DDX20,VDR,A…	-0.897633	5.92978e-05	0.00348887
regulation of ion transport(GO:0043269)	474	1288	95	16354	0.58	379	41592	0.9	SCN3A,SCN2A,SCN1A,CACNB1,CACNB2,CACNB3,CACNB4,NEU1,SCN9A,SCN7A,SCN5A,GCK,WWP2,CAMK2D,CAMK2B,CAMK2A,SNCA,VDAC2,VDAC3,CATSPER2,BDKRB1,TRIAP1,PLA2G6,FKBP1B,TPCN1,PRKCE,PRNP,PLA2R1,KCNK9,KCNJ3,KCNK1,KCNK2,KCNJ4,SCN11A,KCND2,RASGRF2,KCNS3,KCNQ5,ATP8A2,ROS1,GRIK1,AHNAK,TRDN,CA7,CA2,TRPV2,CALM1,NALCN,SRI,ARG1,ABL1,CLCN2,DIAPH1,HTR1B,PTK2B,OXSR1,PDGFB,MMP9,CTNNB1,FHL1,HCN1,CHRM1,CHRNA6,GSTO1,KIF5B,CLIC1,…	SCN3A,SCN3B,SCN2B,SCN2A,SCN1A,SCN1B,CACNB1,CACNB2,CACNB3,CACNB4,CACNG8,CACNG7,CACNG5,CACNG4,CFTR,CACNG2,CACNG1,ATG5,NEU1,SCN9A,SCN8A,SCN7A,SCN5A,GCK,SCN4B,SCN4A,WWP2,PDPK1,TESC,SPTBN4,PPIF,CAMK2G,CAMK2D,CAMK2B,CAMK2A,PARK7,MAOB,XCL1,SNCG,SNCA,WFS1,PTPN6,PTPN3,F2,VDAC2,VDAC3,VDAC1,OPRM1,KCNAB3,KCNAB2,KCNAB1,C5,ACSL4,ACSL6,CXCL11,CXCL12,CXCL10,ABCA7,TTYH1,CYBA,CYBB,CATSPER2,CATSPER3,BDKRB1,SLC31A2,…	-0.450224	6.02209e-05	0.00351126
positive regulation of response to external stimulus(GO:0032103)	173	415	26	16423	0.16	147	41824	0.35	LARP1,PTPRJ,FCER1G,AGTR1,AGER,TF,FKBP1B,PRKD1,JAK2,ADORA2B,BMPR2,ADAM17,LY96,PTK2B,PDGFB,CCL21,CCL19,GPRC5B,THBS4,AIF1,TRIM13,IL16,IL15,SLIT2,CASR,ULK1	ATG7,IL6ST,SASH1,LARP1,TNIP1,CAMK1D,PTPRJ,CLOCK,FFAR3,TLR10,XCL1,PPM1F,FCER1G,FCER1A,DSCAM,SCARF1,AGTR1,F7,F3,OPRM1,HYAL2,C3,C5,CXCL12,CXCL10,AGER,GHSR,PLA2G7,TF,FKBP1B,CYP27B1,SNW1,PRKCA,PRKD1,PRKD2,CREB3,JAK2,ADORA3,EDNRA,TIRAP,WNT5A,GAS6,TGFB1,ADORA2B,BMPR2,CD180,IL23A,S1PR1,ADAM10,ADAM17,SQSTM1,TNFRSF1A,WAC,NTRK3,LY86,LY96,ARTN,ITGA2,SCG2,PTK2B,PAFAH1B2,IDO1,MEGF8,EDN3,STAT5A,EDN1,STAT5B,VEGF…	-0.797549	6.11479e-05	0.00353347
monocarboxylic acid biosynthetic process(GO:0072330)	196	456	31	16418	0.19	165	41806	0.39	ACADM,ACADL,NR1H4,VCAN,ACSM3,ACSM1,ELOVL4,ELOVL2,HACD4,SHMT1,DCN,SCD5,HNF1A,CYP46A1,SCP2,PTGS1,SLC27A2,SLC27A5,HSD17B4,SCD,ALOX12,PEX2,NCAN,INSIG2,PECR,FAM213B,PTGES2,PRKAG1,ALOX5AP,CBR1,TBXAS1	ACADM,ACADL,ABCB11,NR1H2,NR1H4,NR1H3,CYP39A1,NR1D1,FA2H,PARK7,TECR,ACOX2,ACADVL,FCER1A,MECR,AASDHPPT,DECR2,VCAN,ACSL3,ACSM3,ACSM1,NDUFAB1,ACSF3,DHRS9,CYP27A1,PLA2G5,ACSS2,ACSS1,HTT,BCAN,HSD3B7,ELOVL1,ELOVL5,ELOVL4,ELOVL2,ELOVL7,ELOVL6,MSMO1,ALDH9A1,MCAT,GGT5,GGT7,MGST2,ALDH8A1,HACD3,HACD2,HACD4,HACD1,PKLR,CHST12,BGN,MYO5A,HOGA1,SYK,SHMT1,APOA4,APOA5,DCN,WDTC1,OLAH,GAD1,SRR,LIPC,SC5D,CYP7A1,PROX1,…	-0.737297	6.27579e-05	0.00359442
cation transmembrane transport(GO:0098655)	580	1813	121	16328	0.74	459	41512	1.09	SCN3A,ATP6,SCN2A,SCN1A,CACNB1,CACNB2,CACNB3,CACNB4,SLC3A2,SCN9A,SCN7A,SCN5A,WWP2,SFXN3,ATP5A1,SLC25A25,SLC25A15,CAMK2D,SLC4A7,ATP5J2,ATP5G2,ATP5G3,ITPR2,SLC30A2,SLC30A3,SCARA5,SLC30A10,CATSPER2,PLA2G6,FKBP1B,TPCN1,PRKCE,PRNP,KCNK9,KCNJ3,KCNK1,KCNK2,KCNJ4,SCN11A,KCND2,KCNT2,KCNS3,KCNQ5,ATP8A2,ATP6AP1L,AHNAK,TRDN,ATP6V0D1,ATP6V0D2,TRPV2,TRPV4,LOXHD1,TRPM7,TRPM1,AQP1,TRPC4,COX6A1,ATP6V1C2,ATP6V1G2,A…	SCN3A,SCN3B,ATP6,SCN2B,SCN2A,SCN1A,SCN1B,CACNB1,CACNB2,CACNB3,CACNB4,CACNG8,CACNG7,CACNG5,SLC3A2,CACNG4,CACNG2,CACNG1,SCN9A,SCN8A,SCN7A,SCNN1G,SCNN1B,SCN5A,SCNN1A,SCN4B,SCN4A,WWP2,ABCB11,ATP5C1,SFXN3,SFXN4,SFXN1,SFXN2,SFXN5,PIEZO1,PIEZO2,ATP5A1,SLC25A20,SLC25A25,SLC25A37,TESC,SLC25A15,CAMK2D,SLC4A7,ACHE,ATP5J2,ATP5G2,ATP5G3,ATP5F1,ITPR3,ITPR1,ITPR2,SLC4A4,SLC4A5,SLC30A4,SLC30A2,SLC30A3,SLC30A9,SL…	-0.400159	6.36083e-05	0.00361116
cellular protein catabolic process(GO:0044257)	567	1521	118	16331	0.72	449	41522	1.07	LRRK2,WWP2,WWP1,ANAPC1,ANAPC4,ATXN3,ADAMTS7,BNIP3L,UFL1,ERLEC1,SUMO1,KLHL3,SOCS5,MYLIP,RIC1,TTC3,KLHL20,UBE2W,COMMD1,KLHL42,BBS7,RNF217,CDC23,PSMA2,PSMA6,PSMA3,PSMA7,PSMB7,PSMC6,PSMD2,PSMD7,PSME1,PSME2,PSME4,USP53,USP12,USP14,USP21,USP22,USP25,USP24,USP38,CSNK1E,USP46,USP43,USP45,FBXW7,HACE1,FBXL7,FBXL3,FBXO8,NDFIP1,UBA6,ERLIN1,ATRAID,USP7,USP8,USP3,CLU,MVB12B,RNF6,RNF5,ASB2,HECW1,FAP,PTK2B,UCHL5…	ENC1,LRRK2,HDAC6,CUL4A,CUL4B,FAF1,NELL1,WWP2,WWP1,ANAPC1,ANAPC2,ANAPC5,ANAPC4,PIAS1,ANAPC7,NR1D1,XBP1,SEC61B,MDM2,PARK7,ATXN3,ADAMTS7,PPT1,NPLOC4,RLIM,CLOCK,BNIP3L,LNX1,UFL1,ZRANB1,TBL1X,ERLEC1,PAN2,SUMO2,SUMO1,WFS1,KLHL3,KLHL8,SOCS6,SOCS4,SOCS5,ARNTL,AXIN1,BUB1B,MYLIP,RIC1,FOXRED2,IDE,TTC3,BIRC2,TOM1L1,OMA1,KLHL20,UBE2A,UBE2I,UBE2H,UBE2C,UBE2B,UBE2N,UBE2K,UBE2W,COMMD1,UBE2S,UBE3A,UBE3C,KLHL42,UB…	-0.40318	6.45978e-05	0.00363545
purine nucleoside monophosphate metabolic process(GO:0009126)	555	1372	115	16334	0.7	440	41531	1.05	ATP6,ATF7IP,ATP5A1,SLC25A25,SLC25A13,MDN1,ATP5J2,ATP5G2,ATP5G3,SNCA,ABCA3,ABCB1,ABCB4,PICK1,XRCC3,XRCC2,ENPP1,ABCG8,ABCG5,ABCF1,ABCF3,ABCE1,ABCD4,ABCC3,ABCC4,ABCC1,ABCC2,ABCC5,ABCC6,PSMC6,MSH6,MSH3,MSH2,MSH5,MSH4,VPS4A,GART,SKIV2L,MYO10,DMC1,DDX17,DDX18,DDX10,GBAS,PLS1,OLA1,ATP6V1G2,ATP6V1G1,PMS1,SWSAP1,GTF2H4,DDX23,DDX25,DDX24,DDX47,DDX49,DDX56,DDX51,POLQ,ATP13A1,ATAD2,TPM1,COX10,ATP5O,GMPS,DDX3…	ATP6,ADSL,ADSS,DHX8,DHX9,ATF7IP,CFTR,ATRX,IMPDH1,SNRNP200,ATIC,ABCB10,ABCB11,ATP5C1,PPAT,FXN,ATP5A1,SLC25A25,SLC25A23,PPIF,SLC25A13,MDN1,RALBP1,PARK7,SDHAF2,WRNIP1,ACLY,LONRF3,LONRF1,LONRF2,ATP5J2,ATP5G2,KIF9,ATP5G3,KIF7,KIF6,ATP5F1,SNCA,BDNF,ABCC11,ABCC10,YTHDC2,HPRT1,WRN,NDUFB10,TTF2,IDE,NDUFAB1,ABCA8,ABCA7,ABCA9,ABCA2,ABCA1,ABCA3,ABCA6,ABCA5,ABCB9,ABCB8,ABCB1,ABCB7,ABCB6,ABCB4,NDUFAF1,PICK1,UQ…	-0.408651	6.54875e-05	0.00365375
positive regulation of cell death(GO:0010942)	444	981	88	16361	0.53	356	41615	0.85	AIFM2,LRRK2,PAWR,STEAP3,CAMK2A,ARHGEF4,ARHGEF6,BNIP3L,SNCA,CYR61,HP,EPHA7,RRAGA,JMY,UNC5C,RASGRF2,JAK2,DNM1L,ACER2,GRIK2,TGFB3,TGFB2,DCUN1D3,PNMA2,BID,FOXO1,RPS6,DNM2,SPDEF,DHODH,DCC,RAPGEF2,AKAP13,CLU,HOXA5,GRIN2A,MAPK8,MYCN,TP73,TFAP2A,ABL1,CDKN2A,CDKN1B,STK17A,MMP9,CTNNB1,RPS6KA2,TRADD,BMP7,FASLG,MOAP1,FGD4,NFATC4,PPARG,ZNF622,APOPT1,ANO6,ATM,RIPK1,ALOX12,TRIM13,GSK3B,IL10,RPS27A,CD40,RGCC,TRI…	TFPT,AIFM2,AIFM1,ARHGEF18,ARHGEF16,ARHGEF17,ARHGEF12,ARHGEF11,CTNNBL1,NLRC4,ATG7,NET1,FADD,LRRK2,HDAC6,PAWR,PRMT2,FRZB,FAF1,PIAS4,STEAP3,EEF1E1,EEF1A2,PPID,CAMK2A,ARHGEF4,ARHGEF3,ARHGEF2,ARHGEF7,ARHGEF6,ARHGEF9,BNIP3L,VAV3,VAV2,VAV1,NR3C1,HBB,SNCA,HCAR2,CYR61,FNDC1,NEUROD1,TFAP4,WT1,AXIN2,MEN1,PAK3,MELK,IL12A,NR4A1,S100B,HP,ID3,NSMAF,EPHA7,BCL6,SOD1,APBB2,TSPO,RRAGA,ZC3H8,MTCH1,PRKCI,NGFR,PRKDC,H…	-0.464034	6.72993e-05	0.00372274
regulation of Ras protein signal transduction(GO:0046578)	447	1338	89	16360	0.54	358	41613	0.85	RALGPS1,SPATA13,ADRA1A,RAB3GAP1,ITGB1BP1,CAMK2D,RANBP10,ARHGEF4,ARHGEF6,SH3BGRL3,DOCK11,RIC1,DNMBP,EPHB3,EPHA5,RIN3,CHN1,RABGAP1L,PLEKHG3,PSD2,RASGRF2,RAB3IP,FLOT1,FBXO8,KCTD7,FOXJ1,SYDE2,ARAP3,ARAP2,TBC1D9,TBC1D4,TBC1D7,RAPGEF2,GAPVD1,ASAP2,AKAP13,TBC1D15,LLGL1,TBC1D2B,ST5,ARHGAP6,ARHGAP5,CRK,DENND5B,DENND4C,ABRA,SCAI,MFN2,PTK2B,DENND1A,DENND3,SMAP1,IGF1,PREX2,COL3A1,OPHN1,ARHGAP15,CCL21,CCL19,D…	ARHGEF40,RALGPS1,ARHGEF26,ARHGEF25,ARHGEF28,ARHGEF33,ARHGEF39,ARHGEF37,ERRFI1,ARHGEF18,ARHGEF19,ARHGEF16,ARHGEF17,ARHGEF15,ARHGEF12,ARHGEF10,ARHGEF11,KNDC1,NET1,SPATA13,ADRA1A,USP6NL,RAB3GAP2,RAB3GAP1,ACAP3,ACAP1,ACAP2,SSX2IP,RALBP1,ITGB1BP1,CAMK2D,STAMBP,PECAM1,RANBP10,ARHGEF4,ARHGEF3,ARHGEF2,ARHGEF1,ARHGEF7,ARHGEF6,ARHGEF5,ARHGEF9,VAV3,VAV2,VAV1,PIP5K1A,SH2B2,SH3BGRL3,DOCK10,DOCK11,ITPKB,MADD,B…	-0.458323	7.15326e-05	0.0038853
regulation of cell activation(GO:0050865)	401	930	78	16371	0.47	323	41648	0.77	BCL10,PAWR,FYN,PTPRJ,SNCA,FCER1G,SOCS5,IL7,ID2,PRKCQ,PRNP,YES1,IRF1,PDCD1LG2,ZBTB1,AP1G1,MERTK,JAK2,CD276,CD274,VNN1,IL15RA,ADORA2B,APLF,NDFIP1,PLEK,KCTD7,FOXJ1,IL2RA,TESPA1,PLS1,TEC,MZB1,LGALS1,DPP4,C10orf54,IGF1,CDKN2A,PELI1,GPR183,PDGFB,RC3H1,CTNNB1,CCL21,CCL19,RPS6KA1,MAPKAP1,PPP2R3C,MYD88,HSPH1,HLA-DRB3,HLA-DRB4,HLA-DRB5,HPS1,AIF1,MAP3K7,HLA-DRA,ATM,ZNF335,THOC1,ALOX12,AXL,IL15,IL10,HLA-A,CD…	SART1,ZAP70,TICAM1,BCL10,FADD,PAWR,SLA2,IL6ST,NR1H3,SASH3,PDPK1,FYN,TNIP2,PTPRJ,HLX,PGLYRP2,VAV3,VAV1,XCL1,TSPAN32,SNCA,FCER1G,FCER1A,TBX21,AP3B1,AP3D1,ITPKB,PAG1,SOCS6,SOCS5,PTPN6,PTPN2,PAK2,PAK1,PTPRC,PTPRE,F2,IL12A,IL7,LMO4,TNFSF9,ID2,PRKG1,BCL6,SOD1,ZC3H8,MTOR,PRKCA,PRKCD,PRKCQ,PRNP,PRKCZ,HRG,YES1,IRF1,IRF4,IGFBP2,PDCD1LG2,CD226,TCF3,CD209,ZBTB1,AP1G1,MERTK,CDC42,HMOX1,DLG1,JAK2,JAK3,ADORA3,S…	-0.487202	7.2039e-05	0.0038853
regulation of leukocyte activation(GO:0002694)	367	858	70	16379	0.43	297	41674	0.71	BCL10,PAWR,FYN,SNCA,FCER1G,SOCS5,IL7,ID2,PRKCQ,PRNP,YES1,IRF1,PDCD1LG2,ZBTB1,AP1G1,MERTK,CD276,CD274,VNN1,IL15RA,ADORA2B,APLF,NDFIP1,KCTD7,FOXJ1,IL2RA,TESPA1,PLS1,MZB1,LGALS1,DPP4,C10orf54,IGF1,CDKN2A,PELI1,GPR183,RC3H1,CTNNB1,CCL21,CCL19,MAPKAP1,PPP2R3C,MYD88,HSPH1,HLA-DRB3,HLA-DRB4,HLA-DRB5,HPS1,AIF1,MAP3K7,HLA-DRA,ATM,ZNF335,THOC1,AXL,IL15,IL10,HLA-A,CD40,CD55,FLT3,RIPK3,LST1,INHBA,CASP3,SAMSN…	SART1,ZAP70,TICAM1,BCL10,FADD,PAWR,SLA2,IL6ST,NR1H3,SASH3,PDPK1,FYN,TNIP2,HLX,PGLYRP2,VAV3,VAV1,XCL1,TSPAN32,SNCA,FCER1G,FCER1A,TBX21,AP3B1,AP3D1,ITPKB,PAG1,SOCS6,SOCS5,PTPN6,PTPN2,PAK2,PAK1,PTPRC,PTPRE,IL12A,IL7,TNFSF9,ID2,BCL6,SOD1,ZC3H8,MTOR,PRKCQ,PRNP,PRKCZ,YES1,IRF1,IRF4,IGFBP2,PDCD1LG2,CD226,TCF3,CD209,ZBTB1,AP1G1,MERTK,CDC42,HMOX1,DLG1,JAK3,ADORA3,SLC46A2,CYLD,TIRAP,WNT5A,CD276,MALT1,CD274…	-0.511359	7.08637e-05	0.0038853
cellular cation homeostasis(GO:0030003)	426	1016	84	16365	0.51	342	41629	0.81	CACNB4,NEU1,ADRA1A,GCK,FTL,STEAP3,CAMK2D,CYBRD1,SNCA,SLC30A2,SLC30A3,SCARA5,AGTR1,RIC3,XK,BDKRB1,BDKRB2,PLA2G6,TF,FKBP1B,PRKCE,PRNP,TTC7A,JAK2,EDNRB,EPHX2,GRIK2,TRDN,CA7,CA2,NDFIP1,ATP6V0D1,ATP6V0D2,IBTK,TRPV4,TRPM7,TRPM1,INPP4B,ATP6V1C2,ATP6V1G2,ATP6V1G1,ATP6V1E1,ATP6V1E2,CALM1,SRI,ARF1,ABL1,GDF2,DIAPH1,CLN5,PTK2B,TPT1,HIF1A,ATP7B,GNG3,CCL21,CCL19,SLC40A1,IREB2,GPR12,CHRNA7,GTF2I,FASLG,GSTO1,NPT…	CACNB4,CFTR,ATG5,NEU1,TBXA2R,ADRA1A,GCK,FTL,C5AR1,STEAP3,PDPK1,FXN,MON1A,SLC25A23,SLC25A27,CAMK2D,HFE,PPT1,SYPL2,NUBP1,CYBRD1,XCL1,NR3C2,VAPB,SNCA,AP3D1,ITPR3,ITPR1,WFS1,SLC4A3,FTH1,SLC30A4,SLC30A2,SLC30A3,SLC30A7,MAFG,PTPN6,SCARA5,PTPRC,AGTR1,CCR10,F2,RIC3,OPRM1,C7,C5,OPRL1,CP,CXCL11,CXCL12,CXCL10,PVALB,ABCB7,ABCB6,CYBA,XK,BDKRB1,BDKRB2,SLC31A2,SLC31A1,PLA2G6,TF,FKBP1A,FKBP1B,TPCN2,SOD1,CHP1,PRK…	-0.470342	7.49911e-05	0.0040111
cellular response to organonitrogen compound(GO:0071417)	475	1057	96	16353	0.58	379	41592	0.9	FRS2,LRRK2,GCK,NR1H4,FYN,GFPT1,IPO5,ADCY3,ADCY4,ADCY1,ADCY2,SNCA,ADCY6,ITPR2,KLF5,MBD5,GHRHR,RRAGA,PRKCQ,IGFBP1,JAK2,ENPP1,SLC6A4,USF1,ATP6V0D1,ATP6V0D2,FOXO1,RPS6,TBC1D4,MZB1,AQP1,GAB1,RAPGEF2,ATP6V1C2,ADAM17,CAB39L,ATP6V1G2,ATP6V1G1,ATP6V1E1,ATP6V1E2,CRK,ARG1,ABL1,DENND4C,DIAPH1,HTR1B,SLC2A8,COL1A2,LPIN1,COL3A1,PDGFC,SREBF1,CTNNB1,GNG3,CTNNA1,RPS6KB1,HCN1,PXN,EIF4G1,FGF9,EEF2K,RAF1,COL5A2,PPARG…	PARP1,GHR,CFTR,FRS2,LRRK2,HDAC5,HDAC9,PAX6,GCK,PPAT,NR1H4,CPEB2,CPEB3,CPEB4,PDPK1,FYN,GFPT1,MDM2,AP3S1,ARHGEF2,FFAR3,GNG13,GNG11,GNG12,MAS1,GNG10,IPO5,PPM1A,SH2B2,ADCY3,ADCY4,ADCY1,ADCY2,ADCY7,ADCY8,ADCY5,SNCA,ADCY6,BDNF,NFKB1,ITPR2,ADCY9,SOCS2,WT1,PTPN6,PTPN2,PTPN1,PAK1,PTPRE,PTPRA,OPRM1,ACSL6,STRADA,STRADB,IDE,MTUS1,CYBA,KLF5,GHSR,KLF1,KLF4,KLF3,MBD5,TH,SOD1,GHRHR,RRAGA,RRAGB,RRAGC,DNMT1,MTOR,P…	-0.439692	7.69758e-05	0.00403505
regulation of protein transport(GO:0051223)	371	894	71	16378	0.43	300	41671	0.71	LRRK2,WWP2,PPIA,ITGB1BP1,TONSL,EXPH5,STXBP5L,IPO5,PPM1B,PARL,KPNA1,JAK2,RBM22,CD276,CD274,DNM1L,NFKBIA,TGFB3,TGFB2,NDFIP1,NDFIP2,KCTD7,APOA2,TEK,GAPVD1,SFN,SRI,SRGN,MAPK7,ABL1,UHMK1,IFNAR1,LYPLAL1,IGF1,CDKN2A,TMEM30A,CCL19,CHRM1,SMAD4,BMP7,AKAP6,ERBB4,ANK3,GOPC,JUP,TRIM16,TRIM28,GSK3B,IL10,CD40,RGCC,HCLS1,CD14,SP100,XPO4,ZIC1,CDH1,RHBDF2,GLI3,TMEM173,PCM1,P3H1,PCNT,ANGPT1,ZNF268,DYRK2,CABP1,ANXA4…	PARP1,ANP32B,ATG5,LRRK2,FAF1,WWP2,C5AR2,NR1H2,NR1H3,MDFI,LYPLA1,PPIA,PPID,NLRP3,NLRP1,ITGB1BP1,MDM2,PBLD,TONSL,PARK7,BMPR1A,SMN1,FFAR4,EXPH5,SLC51B,MAVS,ACHE,TLR10,STXBP5L,IPO5,PPM1A,PPM1B,MBTPS1,PARL,MED1,FNDC1,AXIN2,AXIN1,KPNA1,CRTAM,GOLPH3L,OPRM1,HYAL2,PKDCC,C5,ACSL3,CIB1,VAMP7,VAMP4,BCL3,CHP2,CHP1,SNX3,MTOR,SORL1,PRKCZ,IRF3,MYO18A,LATS1,FBXW11,CDC42,CREB3,JAK2,CYLD,RBM22,TENM1,WNT5A,CD276,CD2…	-0.507236	7.72345e-05	0.00403505
defense response to other organism(GO:0098542)	288	790	52	16397	0.32	236	41735	0.56	AP2M1,IL10RB,FYN,APOBEC3H,APOBEC3C,ADAMTS4,ACP5,RPL39,BNIP3L,PPM1B,FCER1G,HP,PRF1,IRF9,IRF1,AP1G1,AP1M2,ABCF3,ELMO1,IL2RA,PLS1,PLAC8,ARF1,IFNAR1,COCH,IFNW1,IFNA5,NOD1,CCL20,ELMOD2,MYD88,BATF,TNFAIP8,IL15,IL10,HLA-A,CD40,NCF1,CRCP,DICER1,DEF6,POLR3F,ILF3,POLR3E,IFIH1,BNIP3,LYZ,DNAJC3,RAB1A,PMAIP1,TMEM173,CXADR	AP2S1,TICAM1,NLRC5,NLRC4,FADD,IFITM1,IFITM2,IFITM3,AP2M1,ADARB1,C5AR1,PPBP,IL10RB,AP2A2,AP2A1,FYN,APOBEC3H,APOBEC3C,IL22RA1,NLRP3,NLRP1,ADAMTS5,ADAMTS4,ACP5,NLRX1,RPL39,BNIP3L,PGLYRP2,MAVS,IFI44L,PPM1B,TSPAN32,HCK,SAMHD1,FCER1G,ADAR,MUL1,PAK2,DROSHA,PTPRC,HYAL2,IL12A,CXCL10,HP,IFI16,TNFSF8,MB21D1,PRF1,BCL3,BIRC3,BIRC2,PRKCD,MBL2,HRG,IRF9,IRF5,IRF7,IRF8,IRF1,IRF3,IRF4,KCNJ8,AP1S3,AP1S1,AP1S2,RNASE…	-0.578346	7.73094e-05	0.00403505
purine ribonucleoside monophosphate metabolic process(GO:0009167)	554	1371	115	16334	0.7	439	41532	1.05	ATP6,ATF7IP,ATP5A1,SLC25A25,SLC25A13,MDN1,ATP5J2,ATP5G2,ATP5G3,SNCA,ABCA3,ABCB1,ABCB4,PICK1,XRCC3,XRCC2,ENPP1,ABCG8,ABCG5,ABCF1,ABCF3,ABCE1,ABCD4,ABCC3,ABCC4,ABCC1,ABCC2,ABCC5,ABCC6,PSMC6,MSH6,MSH3,MSH2,MSH5,MSH4,VPS4A,GART,SKIV2L,MYO10,DMC1,DDX17,DDX18,DDX10,GBAS,PLS1,OLA1,ATP6V1G2,ATP6V1G1,PMS1,SWSAP1,GTF2H4,DDX23,DDX25,DDX24,DDX47,DDX49,DDX56,DDX51,POLQ,ATP13A1,ATAD2,TPM1,COX10,ATP5O,GMPS,DDX3…	ATP6,ADSL,ADSS,DHX8,DHX9,ATF7IP,CFTR,ATRX,IMPDH1,SNRNP200,ATIC,ABCB10,ABCB11,ATP5C1,PPAT,FXN,ATP5A1,SLC25A25,SLC25A23,PPIF,SLC25A13,MDN1,RALBP1,PARK7,SDHAF2,WRNIP1,ACLY,LONRF3,LONRF1,LONRF2,ATP5J2,ATP5G2,KIF9,ATP5G3,KIF7,KIF6,ATP5F1,SNCA,BDNF,ABCC11,ABCC10,YTHDC2,HPRT1,WRN,NDUFB10,TTF2,IDE,NDUFAB1,ABCA8,ABCA7,ABCA9,ABCA2,ABCA1,ABCA3,ABCA6,ABCA5,ABCB9,ABCB8,ABCB1,ABCB7,ABCB6,ABCB4,NDUFAF1,PICK1,UQ…	-0.406352	7.83685e-05	0.00405761
myeloid leukocyte activation(GO:0002274)	123	268	16	16433	0.1	107	41864	0.25	SNCA,FCER1G,PRKCE,ADORA2B,KCTD7,PLS1,CLU,DCSTAMP,PI4K2A,BATF,JMJD6,AIF1,CSF2,IL10,CXCR4,LAT2	TICAM1,NR1H3,PDPK1,TNIP2,TSPAN32,SNCA,FCER1G,FCER1A,PTPRE,HYAL2,VAMP7,TNFSF9,PRKCE,PRKCD,IRF4,CD226,HMOX1,ADORA3,WNT5A,RASGRP1,RORA,FOXF1,SPI1,PLSCR1,TGFB1,ADORA2B,MYO1F,CD2,BCR,CAMK4,PRAM1,KCTD7,BPI,PLS1,SYK,TGFBR2,GAB2,ADAM10,CLU,UNC13D,PYCARD,DCSTAMP,FGR,FER,FES,IL31RA,PREX1,STXBP2,STXBP3,IL1RL1,RBPJ,FLT3LG,CPLX2,DOCK2,TRAF6,PI4K2A,CNR1,YWHAZ,BATF3,BATF,HSPD1,LCP2,NOTCH2,PSEN1,THBS1,JMJD6,TLR1…	-0.965105	7.9073e-05	0.00406159
ribonucleoside monophosphate metabolic process(GO:0009161)	570	1403	119	16330	0.72	451	41520	1.07	ATP6,ATF7IP,ATP5A1,SLC25A25,SLC25A13,MDN1,ATP5J2,ATP5G2,ATP5G3,SNCA,ABCA3,ABCB1,ABCB4,PICK1,XRCC3,XRCC2,ENPP1,ABCG8,ABCG5,ABCF1,ABCF3,ABCE1,ABCD4,ABCC3,ABCC4,ABCC1,ABCC2,ABCC5,ABCC6,PSMC6,MSH6,MSH3,MSH2,MSH5,MSH4,VPS4A,GART,SKIV2L,MYO10,CAD,DMC1,DDX17,DDX18,DDX10,GBAS,PLS1,DHODH,OLA1,ATP6V1G2,ATP6V1G1,PMS1,SWSAP1,GTF2H4,DDX23,DDX25,DDX24,DDX47,DDX49,DDX56,DDX51,POLQ,ATP13A1,ATAD2,TPM1,COX10,ATP5O…	ATP6,ADSL,ADSS,DHX8,DHX9,ATF7IP,CFTR,ATRX,IMPDH1,SNRNP200,ATIC,ABCB10,ABCB11,ATP5C1,PPAT,FXN,ATP5A1,SLC25A25,SLC25A23,PPIF,SLC25A13,MDN1,RALBP1,PARK7,SDHAF2,WRNIP1,ACLY,LONRF3,LONRF1,LONRF2,ATP5J2,ATP5G2,KIF9,ATP5G3,KIF7,KIF6,ATP5F1,SNCA,BDNF,ABCC11,ABCC10,YTHDC2,HPRT1,WRN,NDUFB10,TTF2,IDE,NDUFAB1,ABCA8,ABCA7,ABCA9,ABCA2,ABCA1,ABCA3,ABCA6,ABCA5,ABCB9,ABCB8,ABCB1,ABCB7,ABCB6,ABCB4,NDUFAF1,PICK1,UQ…	-0.399173	8.12711e-05	0.00414163
T cell activation(GO:0042110)	365	870	70	16379	0.43	295	41676	0.7	BCL10,PAWR,FYN,SOCS5,IL7,FKBP1B,PRKCQ,PRNP,YES1,IRF1,XRCC4,PDCD1LG2,ZBTB1,CHD7,ITK,CD276,CD274,VNN1,NDFIP1,FOXJ1,IL2RA,TESPA1,RPS6,LGALS1,ADAM17,SP3,ABL1,DPP4,C10orf54,IFNAR1,IGF1,CDKN2A,PELI1,RC3H2,RC3H1,IFNW1,CTNNB1,IFNA5,CCL21,CCL19,MAPKAP1,NCOR1,HSPH1,HLA-DRB3,HLA-DRB4,HLA-DRB5,BATF,KIF13B,JMJD6,PSMB10,AIF1,MAP3K7,RAB27A,HLA-DRA,IL15,IL10,HLA-A,CD55,CXCR4,APC,FLT3,RIPK3,EGR1,CASP3,CASP8,ZEB1,…	SART1,ZAP70,NLRC3,BCL10,FADD,PAWR,SLA2,IL6ST,SASH3,PDPK1,ZFP36L1,ZFP36L2,FYN,HLX,RPL22,VAV1,XCL1,TBX21,AP3B1,AP3D1,ITPKB,PAG1,SATB1,SOCS6,SOCS5,PTPN6,PTPN2,PAK2,PAK1,PTPRC,PATZ1,ELF4,IL12A,PPP3CB,PPP3CA,IL7,CXCL12,TNFSF9,TNFSF8,FUT7,FKBP1A,FKBP1B,BCL3,BCL6,SOD1,ZC3H8,MTOR,PRKCQ,PRNP,PRKCZ,PRKDC,YES1,GIMAP1,PRLR,IRF1,IRF4,IGFBP2,XRCC4,PDCD1LG2,TCF3,CD209,ZBTB1,JAG2,CDC42,DLG1,CHD7,JAK3,SLC46A2,CYL…	-0.504555	8.71504e-05	0.00440654
inorganic ion transmembrane transport(GO:0098660)	577	1837	121	16328	0.74	456	41515	1.09	SCN3A,ATP6,SCN2A,SCN1A,CACNB1,CACNB2,CACNB3,CACNB4,SLC3A2,SCN9A,SCN7A,SCN5A,WWP2,ATP5A1,SLC25A25,CAMK2D,SLC4A7,ATP5J2,ATP5G2,ATP5G3,ITPR2,SLC30A3,SCARA5,CATSPER2,PLA2G6,FKBP1B,TPCN1,PRKCE,PRNP,KCNK9,KCNJ3,KCNK1,KCNK2,KCNJ4,SCN11A,KCND2,KCNT2,KCNS3,KCNQ5,ATP6AP1L,AHNAK,TRDN,ATP6V0D1,ATP6V0D2,TRPV2,TRPV4,LOXHD1,TRPM7,TRPM1,AQP1,TRPC4,COX6A1,ATP6V1C2,ATP6V1G2,ATP6V1G1,ATP6V1E1,ATP6V1E2,CALM1,NALCN,P…	SCN3A,SCN3B,ATP6,SCN2B,SCN2A,SCN1A,SCN1B,CACNB1,CACNB2,CACNB3,CACNB4,CACNG8,CACNG7,CACNG5,SLC3A2,CACNG4,CFTR,CACNG2,CACNG1,SCN9A,SCN8A,SCN7A,SCNN1G,SCNN1B,SCN5A,SCNN1A,SCN4B,SCN4A,WWP2,ABCB11,ATP5C1,ATP5A1,SLC25A25,SLC25A37,TESC,SLC25A10,CAMK2D,ADAMTS8,SLC4A7,ATP5J2,ATP5G2,ATP5G3,ATP5F1,SLC26A10,SLC26A11,ITPR3,ITPR1,ITPR2,SLC4A2,SLC4A4,SLC4A5,SLC30A4,SLC30A3,SLC30A6,PTPN3,SCARA5,OPRM1,KCNAB3,KCNA…	-0.393529	8.98665e-05	0.00444441
cellular response to hormone stimulus(GO:0032870)	523	1277	108	16341	0.66	415	41556	0.99	FRS2,NR2C2,GCK,NR1H4,NR1I3,NR1I2,FYN,GFPT1,FOS,ADCY3,ADCY4,ADCY1,ADCY2,ADCY6,NR2F2,AR,NR4A2,MBD5,GHRHR,PRKCQ,IGFBP1,MSTN,LATS2,BBS4,JAK2,ENPP1,USF1,CSNK2B,APOB,PLAT,ATP6V0D1,ATP6V0D2,FOXO1,RPS6,TBC1D4,ESR2,MZB1,AQP1,GAB1,AKAP13,ATP6V1C2,ADAM17,CAB39L,ATP6V1G2,ATP6V1G1,ATP6V1E1,ATP6V1E2,OCSTAMP,RAMP3,CRK,ARG1,DENND4C,ADIPOR2,SLC2A8,LPIN1,ACVR1,ASNS,NR0B2,ESRRG,FBXO32,SREBF1,PGF,CTNNB1,GNG3,RPS6KB1…	PARP1,GHR,CFTR,NR2E1,FRS2,NR2C2,NR2C1,HDAC5,HDAC9,PAX6,PAX8,GCK,PPAT,NR1H2,NR1H4,NR1H3,NR1I3,NR1I2,CPEB2,PDPK1,NR1D1,NR1D2,FYN,GFPT1,FOS,MDM2,AP3S1,FFAR3,GNG13,GNG11,GNG12,MAS1,GNG10,PPM1A,NR3C2,NR3C1,SH2B2,ADCY3,ADCY4,ADCY1,ADCY2,ADCY7,ADCY8,ADCY5,ADCY6,NFKB1,NR2F6,NR2F2,NR2F1,MED1,ADCY9,SOCS2,TFAP4,WT1,PTPN6,PTPN2,PTPN1,PAK1,PTPRE,PTPRA,AR,ACSL1,ACSL6,STRADA,STRADB,LMO2,IDE,MTUS1,PRCP,NR4A2,NR4…	-0.412783	9.04069e-05	0.00444441
negative regulation of protein phosphorylation(GO:0001933)	274	632	49	16400	0.3	225	41746	0.54	LRRK2,LRRK1,ITGB1BP1,PTPRJ,XDH,SNCA,NR2F2,SOCS5,ILK,BDKRB1,BDKRB2,MBIP,SNX6,PRNP,DEPTOR,LATS2,ENPP1,PKIB,KCTD7,IBTK,TAF7,SFN,CALM1,TP73,ABL1,ENG,CDKN2A,CDKN2B,CDKN2D,CDKN1B,WNK1,MYADM,BMP7,SPRY4,SPRY2,SPRED2,RGS2,GSK3B,TRIB2,APC,DUS2,SLIT2,DNAJC3,CASP3,SAMSN1,ANGPT1,CTDSPL,PDE4D,DAB2IP	ERRFI1,LRRK2,LRRK1,PAX6,GBA,ADARB1,PDPK1,PARD3,TESC,ITGB1BP1,PBLD,PARK7,PECAM1,PTPRJ,HEXIM2,HEXIM1,MAS1,XDH,PPM1F,PPM1E,SNCA,ADAR,FAM129A,NR2F2,SOCS4,SOCS5,TFAP4,PTPN6,PTPN2,PTPN1,MEN1,PAK2,PTPRC,ILK,PRKRIP1,HYAL2,CIB1,BDKRB1,BDKRB2,EPHA1,FKBP1A,MLLT1,MBIP,CHP1,SNX6,IRAK3,SORL1,PRKCA,PRKCD,UBE2B,LDLRAD4,PRNP,PRKCZ,PRKDC,DEPTOR,LATS1,LATS2,PPP2CA,IMPACT,PRKAR2B,PRKAR2A,HHEX,PRKAR1B,PRKAR1A,ENPP1,S…	-0.589958	8.91589e-05	0.00444441
hexose metabolic process(GO:0019318)	266	641	47	16402	0.29	219	41752	0.52	EPM2AIP1,ADRA1B,ACADM,UGP2,GCK,MDH1,STEAP4,GFPT1,SLC25A13,HK1,FUT9,FUT8,FUOM,ENPP1,PFKFB3,PFKFB2,PPP1CB,USF1,HIBADH,GBE1,FOXO1,HKDC1,CALM1,GALM,GALT,PMM2,POMC,DUSP12,IGF1,PPARD,GPD2,RPE,GOT2,GSK3B,RPS27A,KHK,GLYR1,YLPM1,NCOA2,CRYM,PHKG1,PMAIP1,PCK2,PCK1,INSR,DYRK2,C1QTNF2	PPP1CA,PASK,EPM2AIP1,ATF3,ADRA1B,ACADM,PGM2L1,GAA,UGP2,GCK,MDH2,MDH1,STEAP4,NR1D1,GFPT1,SLC25A12,SLC25A11,SLC25A13,SLC25A10,HK2,HK1,HK3,NR3C1,GYG2,GYG1,GYS1,GYS2,PTPN2,ENO2,ENO3,ENO1,GPI,PGAM1,PGAM2,CRTC2,PC,GDPGP1,G6PC,G6PD,FUT9,FUT8,FUT7,FUT6,FUT5,FUT4,FUT1,OMA1,FUOM,MTOR,POFUT2,POFUT1,IGFBP4,IGFBP5,DLAT,SORD,CPT1A,IRS1,ENPP1,PFKFB4,PFKFB3,PFKFB2,PFKFB1,GALK2,GALK1,PPP1CB,WDR5,RORC,RORA,USF1,MI…	-0.60458	9.06463e-05	0.00444441
cytokine-mediated signaling pathway(GO:0019221)	369	1175	71	16378	0.43	298	41673	0.71	IL11RA,IL10RB,CAMK2D,CAMK2B,CAMK2A,CNTFR,PPM1B,IL5RA,SUMO1,SOCS5,IFNGR2,KPNA5,KPNA3,KPNA1,AGPAT1,IRF9,IRF1,IRF2,BBS4,JAK2,ZCCHC11,EREG,CSNK2B,IL15RA,KCTD7,IL2RA,GAB1,GALT,TNFRSF1B,IL17RA,EPOR,ADIPOR2,PTK2B,IFNAR1,IFNAR2,HIF1A,IFNW1,IFNA5,ZBP1,GPR75,TRADD,EIF4G1,RAE1,MYD88,PPARG,ROBO1,MKKS,HLA-DRB3,HLA-DRB4,HLA-DRB5,HLA-DRA,ARIH1,RIPK1,AXL,LRP8,RPS27A,HLA-A,HLA-B,HLA-F,CXCR4,SP100,NUP153,NUP214,NU…	TICAM2,GHR,NLRC5,FADD,IL11RA,IFITM1,IFITM2,IFITM3,IL6ST,PIAS1,NR1H2,VRK2,NR1H3,IL10RB,IL10RA,IL22RA1,TNIP2,CAMK2G,CAMK2D,CAMK2B,GFI1,CAMK2A,PTPRN,MST1R,MAVS,CNTFR,DUOX1,CCRL2,CSF2RB,CSF2RA,PPM1B,SH2B2,HCK,IL5RA,ADAR,MED1,SUMO1,SOCS5,PTPN6,PTPN2,MUL1,PTPN1,KPNB1,IFNGR2,IFNGR1,KPNA5,KPNA4,KPNA3,KPNA2,KPNA1,PLVAP,PTPRC,CCR10,ACSL1,CXCL11,CXCL12,CXCL10,CIB1,IFI30,IFI35,KLF6,AGPAT1,FKBP1A,IRAK4,IRAK3,…	-0.500499	9.46083e-05	0.0046038
gland development(GO:0048732)	381	635	74	16375	0.45	307	41664	0.73	BTBD7,CACNB4,FRS2,ACADM,ACAT1,SULF1,XDH,AR,ID2,EPHB3,GHRHR,PLXND1,CHUK,ZBTB1,JAK2,TBX3,GNPNAT1,TGFB3,TGFB2,FBXW7,FOXA1,CAD,DHODH,ESR2,HOXA5,HOXA9,FPGS,ARHGAP5,SP3,ARG1,ABL1,IFT88,FKBP4,CLCN2,HNF1A,EAF2,ASNS,EIF2AK3,IGF1,PRKCSH,CDKN2B,HIF1A,COBL,CDKN1B,ATP7B,PDGFB,CTNNB1,SMAD4,BMP7,ETS1,GATA6,ROBO1,MKL2,ERBB4,NOTCH4,CPS1,HAND2,SMARCA4,BRCA2,DDR1,APC,NPHP3,ZIC3,NCOA1,NCOA3,CDH1,SLIT2,RIPK3,NTN4,TCF…	BTBD7,CACNB4,ATG7,FRS2,NET1,FADD,PAX6,PAX3,PAX8,ACADM,GAK,FRZB,ACAT1,PPAT,XBP1,JARID2,FA2H,PYGO2,TET2,SULF1,BMPR1A,HGF,HLX,HK2,XDH,NR3C1,RXFP1,MED1,WT1,PTPN3,BDH1,ELF3,AR,LMO4,ID2,EPHB3,EPHA2,KLF1,SOD1,SOD2,TSPO,PLXNA1,GHRHR,PLXND1,CHUK,UBE3A,HPN,PRLR,IRF6,IGFBP5,HMGCS1,ADCYAP1,ZBTB1,IRS1,HHEX,CDC42,ALDH9A1,SEC63,MSX2,PSAP,CREB1,JAK2,PITX2,SLC46A2,TBX3,TBX2,TBX1,DKK3,SLC6A3,QDPR,WNT5A,SOX9,WNT11,…	-0.488901	9.71997e-05	0.0046946
cellular ion homeostasis(GO:0006873)	440	1036	88	16361	0.53	352	41619	0.84	CACNB4,NEU1,ADRA1A,GCK,FTL,STEAP3,CAMK2D,CYBRD1,SNCA,SLC30A2,SLC30A3,SCARA5,AGTR1,RIC3,XK,BDKRB1,BDKRB2,PLA2G6,TF,FKBP1B,PRKCE,PRNP,TTC7A,JAK2,ENPP1,EDNRB,ABCC2,EPHX2,GRIK2,TRDN,CA7,CA2,NDFIP1,ATP6V0D1,ATP6V0D2,IBTK,TRPV4,TRPM7,TRPM1,INPP4B,ATP6V1C2,ATP6V1G2,ATP6V1G1,ATP6V1E1,ATP6V1E2,CALM1,SRI,ARF1,ABL1,GDF2,DIAPH1,CLN5,PTK2B,TPT1,HIF1A,ATP7B,GNG3,CCL21,CCL19,SLC40A1,IREB2,GPR12,CHRNA7,GTF2I,FAS…	CACNB4,CFTR,ATG5,NEU1,TBXA2R,ADRA1A,GCK,FTL,C5AR1,STEAP3,PDPK1,FXN,MON1A,SLC25A23,SLC25A27,CAMK2D,HFE,PPT1,SYPL2,NUBP1,CYBRD1,XCL1,NR3C2,VAPB,SNCA,AP3D1,ITPR3,ITPR1,WFS1,SLC4A3,FTH1,SLC30A4,SLC30A2,SLC30A3,SLC30A7,MAFG,PTPN6,SCARA5,PTPRC,AGTR1,CCR10,F2,RIC3,OPRM1,C7,C5,OPRL1,CP,CXCL11,CXCL12,CXCL10,PVALB,ABCB7,ABCB6,CYBA,XK,BDKRB1,BDKRB2,SLC31A2,SLC31A1,PLA2G6,TF,FKBP1A,FKBP1B,TPCN2,SOD1,CHP1,PRK…	-0.452638	9.81318e-05	0.00470451
modification-dependent protein catabolic process(GO:0019941)	505	1340	104	16345	0.63	401	41570	0.96	LRRK2,WWP2,WWP1,ANAPC1,ANAPC4,ATXN3,UFL1,ERLEC1,SUMO1,KLHL3,SOCS5,MYLIP,TTC3,KLHL20,UBE2W,COMMD1,KLHL42,BBS7,RNF217,CDC23,PSMA2,PSMA6,PSMA3,PSMA7,PSMB7,PSMC6,PSMD2,PSMD7,PSME1,PSME2,PSME4,USP53,USP12,USP14,USP21,USP22,USP25,USP24,USP38,CSNK1E,USP46,USP43,USP45,FBXW7,HACE1,FBXL7,FBXL3,FBXO8,NDFIP1,UBA6,ERLIN1,ATRAID,USP7,USP8,USP3,CLU,MVB12B,RNF6,RNF5,ASB2,HECW1,PTK2B,UCHL5,UCHL3,UBE2J1,FBXO11,UBX…	LRRK2,HDAC6,CUL4A,CUL4B,FAF1,NELL1,WWP2,WWP1,ANAPC1,ANAPC2,ANAPC5,ANAPC4,PIAS1,ANAPC7,SEC61B,MDM2,PARK7,ATXN3,NPLOC4,RLIM,CLOCK,LNX1,UFL1,ZRANB1,TBL1X,ERLEC1,PAN2,SUMO2,SUMO1,WFS1,KLHL3,KLHL8,SOCS4,SOCS5,ARNTL,AXIN1,BUB1B,MYLIP,FOXRED2,TTC3,BIRC2,TOM1L1,KLHL20,UBE2A,UBE2I,UBE2H,UBE2C,UBE2B,UBE2N,UBE2K,UBE2W,COMMD1,UBE2S,UBE3A,UBE3C,KLHL42,UBE4A,UBE4B,PPP2CB,FBXW11,BUB3,MTA1,BBS7,HERPUD1,CHFR,RNF2…	-0.416114	0.000103278	0.00491481
regulation of cytokine production(GO:0001817)	456	1180	92	16357	0.56	364	41607	0.87	BCL10,ATF2,SULF2,SULF1,ACP5,PPM1B,FCER1G,IL5RA,MC1R,ELF1,LZTS1,MAPKAPK2,AGPAT1,CHUK,PRKCQ,PRNP,IRF1,XRCC5,JAK2,ZCCHC11,CD276,CD274,NFKBIA,EREG,TGFB3,TGFB2,ADORA2B,NDFIP1,AKIRIN2,KCTD7,FOXJ1,APOA2,TEK,ADAM17,CLU,SRGN,IL17RA,ABL1,GDF2,POMC,C10orf54,IFNAR1,HIF1A,PELI1,UBE2D3,CTNNB1,NOD1,CCL20,ZBP1,CCL19,CHRNA7,SMAD4,NFATC4,MYD88,AFAP1L2,GATA6,GATA4,GPRC5B,HPSE,MAP3K7,RIPK1,CSF2,TRIM16,AXL,IL15,IL10,…	DHX9,TICAM1,TICAM2,NLRC5,ATG5,BCL10,FADD,ATF2,HDAC7,GBA,IL6ST,C5AR2,SASH3,NLRP3,NLRP1,PARK7,SULF2,SULF1,ACP5,ARHGEF2,FFAR4,FFAR3,NLRX1,PGLYRP2,MAVS,TLR10,XCL1,PPM1B,ACE2,FCER1G,FCER1A,IL5RA,NFKB1,NFKB2,MEFV,MUL1,MC1R,CRTAM,ELF1,LZTS1,HYAL2,IL12A,C3,C5,MAPKAPK2,LRRFIP1,IFI16,TNFSF9,GHSR,KLF4,AGPAT1,PRG4,MB21D1,ATG12,BCL3,BCL6,SOD1,BIRC3,BIRC2,TSPO,IRAK3,CHUK,PRKD2,PRKCQ,PRNP,PRKCZ,PRKDC,IRF5,IRF7,…	-0.441753	0.000105061	0.00496318
multicellular organismal homeostasis(GO:0048871)	193	439	31	16418	0.19	162	41809	0.39	LRRK1,ACADL,FTO,ACP5,IL7,TF,BBS4,EDNRB,VPS54,CA2,FOXO1,DCSTAMP,HNF1A,PTK2B,TPP1,ZNF830,CTNNB1,SLC40A1,SERPINA3,GPX2,MKKS,HOMER1,COL14A1,LCA5,NPHP3,EPAS1,CDH3,LYZ,FLCN,CXADR,GCNT2	BTBD9,PASK,LRRK1,ACADL,FTO,SASH3,NR1D1,NR1D2,PBLD,ACP5,HFE,ACADVL,ADD1,NEUROD1,CRTC3,FH,HYAL2,IL7,PRCP,MUC4,TF,SOD1,OMA1,BBS4,BBS1,BBS2,ADRB2,ADORA1,EDNRB,COL11A2,SOX9,VPS54,SPP1,CA2,CD7,FOXO1,CSF1R,RPA1,ERCC6,SYK,IL1RN,INPP5D,DBH,S1PR1,SRF,SRC,CSK,LIPA,SGIP1,P2RX4,P2RX7,ILDR2,ITGB3,ITGB1,CORO1A,PCDH15,DCSTAMP,HNF1A,WDR36,PTK2B,HTR2A,STK11,IL20RA,TPP1,PPP1R13L,F2R,IGKC,VEGFA,RBP4,CIDEA,NAPSA,ZNF8…	-0.718876	0.000107634	0.00504787
modification-dependent macromolecule catabolic process(GO:0043632)	509	1354	105	16344	0.64	404	41567	0.96	LRRK2,WWP2,WWP1,ANAPC1,ANAPC4,ATXN3,UFL1,ERLEC1,SUMO1,KLHL3,SOCS5,MYLIP,TTC3,KLHL20,UBE2W,COMMD1,KLHL42,BBS7,RNF217,CDC23,PSMA2,PSMA6,PSMA3,PSMA7,PSMB7,PSMC6,PSMD2,PSMD7,PSME1,PSME2,PSME4,USP53,USP12,USP14,USP21,USP22,USP25,USP24,USP38,CSNK1E,USP46,USP43,USP45,FBXW7,HACE1,FBXL7,FBXL3,FBXO8,NDFIP1,UBA6,ERLIN1,ATRAID,USP7,USP8,USP3,PNPT1,CLU,MVB12B,RNF6,RNF5,ASB2,HECW1,PTK2B,UCHL5,UCHL3,UBE2J1,FBXO…	LRRK2,HDAC6,CUL4A,CUL4B,FAF1,NELL1,WWP2,WWP1,ANAPC1,ANAPC2,ANAPC5,ANAPC4,PIAS1,ANAPC7,SEC61B,MDM2,PARK7,ATXN3,NPLOC4,RLIM,CLOCK,LNX1,UFL1,ZRANB1,TBL1X,ERLEC1,PAN2,SUMO2,SUMO1,WFS1,KLHL3,KLHL8,SOCS4,SOCS5,ARNTL,AXIN1,BUB1B,MYLIP,FOXRED2,TTC3,BIRC2,TOM1L1,KLHL20,UBE2A,UBE2I,UBE2H,UBE2C,UBE2B,UBE2N,UBE2K,UBE2W,COMMD1,UBE2S,UBE3A,UBE3C,KLHL42,UBE4A,UBE4B,PPP2CB,FBXW11,BUB3,MTA1,BBS7,HERPUD1,CHFR,RNF2…	-0.414009	0.000109196	0.0050843
regulation of nervous system development(GO:0051960)	595	1147	126	16323	0.77	469	41502	1.12	NEU1,LRRK2,HDAC2,PAX2,ZFHX3,FYN,CFL2,CAMK2B,MAPT,ADCY6,PTPRZ1,PTPRD,ILK,LZTS1,TTC3,ID2,XK,EPHB3,FKBP1B,CHN1,FUOM,CHRD,PRKCH,PRKD1,XRCC5,XRCC4,XRCC2,CHD7,EDNRB,TENM3,SLC6A4,ELL3,ATP8A2,SNAP25,IL15RA,BMPR2,FOXA1,TNR,TRPV2,TRPV4,HEY2,DCC,PDLIM5,RAPGEF2,LGALS1,ACTR3,CAPRIN2,HOXA2,RNF10,MYCN,TP73,IFT122,TFAP2A,FKBP4,RNF6,SSH2,LIN28A,NME2,SPG20,PTK2B,STK24,NKX2-2,WASF3,SPOCK1,EIF2AK3,IGF1,PRKCSH,PACSIN…	BARHL2,SCN1B,GFAP,ARHGEF15,KNDC1,NR2E1,NET1,NEU1,LRRK2,ATF1,ARHGDIA,ATF5,SARM1,HDAC2,PAX6,PAX2,IL6ST,ANAPC2,ZFHX3,CPEB3,PARD3,FYN,FN1,CBFA2T2,CFL2,CAMK1D,CAMK2B,GFI1,NEFM,BMPR1A,PTPRG,HMG20A,HMG20B,PTPRO,HGF,MAPT,ARHGEF2,ARHGEF1,NRCAM,TWF2,ACHE,ADCY6,BDNF,PALM,NR2F1,MED1,PTPRZ1,NEUROD2,NEUROD1,DSCAM,ARNTL,PAK3,SCARF1,PTPRD,ILK,F2,OPRM1,LZTS1,ACSL6,CXCL12,CIB1,BEND6,STMN2,TTC3,AVIL,KLK6,KLK8,ID2,V…	-0.381154	0.000114826	0.00530824
regulation of intracellular transport(GO:0032386)	413	985	82	16367	0.5	331	41640	0.79	LRRK2,ITGB1BP1,CAMK2D,TONSL,MAPT,WWC1,IPO5,PPM1B,SNCA,FCER1G,PARL,REEP2,KPNA1,PPP3CC,BDKRB1,FKBP1B,SAR1A,JAK2,RBM22,NFKBIA,TGFB3,ADORA2B,TRDN,BID,KCTD7,TEK,INPP4B,SFN,CALM1,SRI,MAPK8,MAPK7,ABL1,IER3,DIAPH1,PTK2B,SCFD1,UHMK1,PPP1R12A,LYPLAL1,IGF1,CDKN2A,TMEM30A,SCP2,CCL19,CHRM1,SMAD4,BMP7,GSTO1,YWHAQ,AKAP6,ERBB4,ANK3,GOPC,JUP,TRIM28,GSK3B,IL10,HCLS1,SP100,NUP153,XPO4,ZIC1,CDH1,RYR2,SLC35F6,CASP8,R…	ACAA2,PARP1,ANP32B,ATG5,LRRK2,FAF1,MDFI,PDPK1,LYPLA1,YIPF5,NLRP3,ITGB1BP1,MDM2,PBLD,CAMK2D,NEFH,TONSL,PARK7,BMPR1A,MAPT,SMN1,SLC51B,MAVS,XCL1,WWC1,IPO5,PPM1A,PPM1B,MBTPS1,SNCA,FCER1G,FCER1A,PARL,MED1,AXIN2,AXIN1,REEP6,PTPN6,MUL1,REEP2,KPNA1,MYLK2,F2,HYAL2,PKDCC,PPP3CC,ACSL3,CXCL11,CXCL10,CIB1,VAMP7,VAMP4,ABCA2,CYBA,BDKRB1,FKBP1B,BCL3,CHP2,CHP1,ZC3H3,SNX3,MTOR,SORL1,ATPIF1,FBXW11,SAR1A,CDC42,HMOX1…	-0.461605	0.000116635	0.00535361
platelet activation(GO:0030168)	256	658	45	16404	0.27	211	41760	0.5	FYN,PPIA,PTPRJ,FCER1G,ITPR2,ILK,TF,PRKCH,PRKCE,PRKCQ,MERTK,ABCC4,TGFB3,TGFB2,PLEK,TTN,PLS1,DAGLA,TEC,CALM1,CLU,SRGN,CRK,COL1A2,IGF1,GNA14,STXBP1,COL3A1,PDGFB,SERPINA1,CLIC1,RAF1,HSPA5,ALOX12,AXL,PTK2,CD40,RHOB,PDPN,PIK3CB,DGKB,DGKH,P2RY12,FZD6,THPO	TBXA2R,PPBP,PDPK1,FYN,FN1,PPIA,PTPRJ,HGF,VAV3,VAV2,VAV1,PIP5K1C,TSPAN32,HBB,FCER1G,ITPR3,ITPR1,ITPR2,PTPN6,PTPN1,ILK,F8,F5,F2,PRKG1,TF,SOD1,PRKCA,PRKCH,PRKCG,PRKCE,PRKCD,PRKCB,PRKCQ,PRKCZ,HRG,SOS1,MERTK,PSAP,ABCC4,ENTPD1,ENTPD2,WDR1,RASGRP1,RASGRP2,GAS6,PLSCR1,TGFB3,TGFB1,TGFB2,ARRB2,ARRB1,SLC7A11,CD9,APOE,PLEK,TTN,PLS1,SYK,DAGLA,DAGLB,ACTN4,ACTN1,ACTN2,TEC,RAPGEF4,RAPGEF3,CFD,TRPC3,TRPC6,TRPC7,C…	-0.610782	0.000117477	0.00535432
response to peptide(GO:1901652)	438	886	88	16361	0.53	350	41621	0.83	FRS2,NEU1,EPM2AIP1,GCK,FYN,GFPT1,ADCY3,ADCY4,ADCY1,ADCY2,ADCY6,AR,KLF5,MBD5,GHRHR,PRKCQ,IGFBP1,HADHA,JAK2,ENPP1,NFKBIA,USF1,EREG,PLAT,ATP6V0D1,ATP6V0D2,FOXO1,RPS6,TBC1D4,TEK,MZB1,GAB1,ATP6V1C2,ADAM17,CAB39L,ATP6V1G2,ATP6V1G1,ATP6V1E1,ATP6V1E2,CRK,ARG1,DENND4C,SLC2A8,LPIN1,ACVR1C,CDKN1B,PDGFB,SREBF1,CTNNB1,GNG3,RPS6KB1,PXN,BMP7,EIF4G1,FGF9,EEF2K,RAF1,PPARG,PHIP,ANKRD26,CPS1,TRIM16,IL10,PTK2,CD55,G…	GGH,PARP1,GHR,CFTR,FRS2,NEU1,EPM2AIP1,TFF3,HDAC5,HDAC9,PAX6,GCK,PPAT,CPEB2,PDPK1,FYN,GFPT1,NLRP1,MDM2,PTPRN,AP3S1,ARHGEF2,FFAR3,GNG13,GNG11,GNG12,MAS1,GNG10,PPM1A,SH2B2,ADCY3,ADCY4,ADCY1,ADCY2,ADCY7,ADCY8,ADCY5,ADCY6,NFKB1,ADCY9,SOCS2,PTPN6,PTPN2,PTPN1,PAK1,BDH1,PTPRE,PTPRA,F7,AR,SORT1,ACSL6,STRADA,STRADB,IDE,CXCL12,MTUS1,CYC1,KLF5,GHSR,KLF1,KLF4,KLF3,MBD5,TH,GHRHR,MTOR,PRKCA,PRKCI,PRKCD,UBE2B,PR…	-0.446892	0.000118524	0.00536426
positive regulation of cellular component movement(GO:0051272)	295	672	54	16395	0.33	241	41730	0.57	ITGB1BP1,CAMK2D,PTPRJ,CYR61,ILK,STMN1,BDKRB1,TF,PRKCE,PRKD1,SYNE2,JAK2,ELP3,TGFB2,BMPR2,TEK,AQP1,RAPGEF2,ADAM17,ARHGAP5,TFAP2A,DIAPH1,PTK2B,IGF1,AMOT,HIF1A,PDGFB,MMP9,MYADM,CCL20,CCL21,CCL19,RPS6KB1,ETS1,TNFAIP6,HSPA5,LAMB1,THBS4,AIF1,ALOX12,PTK2,APC,SPAG9,FLT1,DAPK3,PDPN,EPB41L5,ANGPT1,ZNF268,INSR,PDE4D,DAB2IP,GCNT2,SUN2	AMOTL1,ARHGEF39,FADD,HDAC9,HDAC7,HDAC6,PAX6,FAM110C,SASH1,PHPT1,ITGB1BP1,CAMK1D,CAMK2D,PECAM1,PTPRJ,HGF,ARHGEF7,ANGPTL3,XCL1,PPM1F,CYR61,MIEN1,SCARB1,PLVAP,PTPRC,PLET1,ILK,F7,F3,HYAL1,PTP4A1,CXCL12,CXCL10,CIB1,STMN1,CXCL16,BDKRB1,EPHA1,PLA2G7,TF,BCL6,PRKCA,PRKCE,PRKD1,PRKD2,SYNE2,IRS1,SEBOX,RRAS2,CREB3,JAK2,ADORA3,MCAM,EDNRA,TIRAP,WNT5A,SOX9,ELP3,ELP6,ELP5,WNT11,ATP8A1,FOXF1,GAS6,MMP14,TGFB1,TGFB…	-0.561569	0.000119626	0.00537651
muscle tissue development(GO:0060537)	358	597	69	16380	0.42	289	41682	0.69	HDAC2,ACADM,ZFHX3,FOS,CAMK2D,COPS2,TBX20,NR2F2,MAFF,ILK,WNT8A,ID2,XK,KLF5,MSTN,TBX3,TBX5,TGFB2,DDX17,HIF1AN,TTN,FOXN2,CFLAR,BMP10,HEY2,DCN,DNER,GPCPD1,XIRP1,XIRP2,MYF6,IFT88,ASB2,ACVR1,ELN,ENG,TPM1,ZFPM2,COL3A1,RPS6KB1,SMAD1,FGF9,KIAA1161,GATA6,GATA4,AKAP6,MKL2,ERBB4,HOMER1,HAND1,COL14A1,OSR1,GJA1,POPDC2,DICER1,CDON,FGF20,SAP30,EGR1,EGR2,RYR2,TCF21,EYA2,CACYBP,NACA,MYH11,MYH10,CXADR,CBY1	ATG5,ATG7,HDAC5,HDAC4,HDAC2,ATF3,HDAC9,ACADM,NEXN,MAML1,ZFHX3,NR1D2,MEOX2,NEBL,FOS,TIPARP,CAMK2D,HMG20B,HLF,HLX,BDNF,COPS2,TBX20,NR2F2,TBX18,MED1,ARNTL,WT1,MAFF,BVES,CYP26B1,ILK,MYLK2,PPP3CA,WNT8A,LMNA,CXCL10,VAMP5,NR4A1,S100B,CXCL14,ID2,ID3,XK,KLF5,FKBP1A,BCL9,MTPN,MYLPF,KLHL40,KLHL41,IGFBP5,MYO18B,MSTN,C3orf58,DLL4,PRKAR1A,HIVEP3,CDC42,DLG1,PITX2,COL11A1,SPEG,BCL9L,TBX3,TBX2,TBX5,TBX1,TENM4,DKK…	-0.498312	0.000121635	0.00539195
protein dephosphorylation(GO:0006470)	188	605	30	16419	0.18	158	41813	0.38	MDP1,PTPRJ,PTPRK,PTPRS,PTPRQ,PPM1G,PPM1B,PTPRZ1,PTPN4,PTPRD,ANKLE2,RNGTT,PPP1CB,PHLPP2,CALM1,SSH2,CNEP1R1,PPP1R12A,DUSP12,MTMR6,SSU72,PPP2R2A,PPP6C,DUS2,PDP2,PDXP,EYA4,EYA2,STYX,CDC25C	PPP1CA,PTPRN2,GBA,CTTNBP2NL,CTDNEP1,MDP1,PHPT1,PTPRJ,PTPRK,PTPRM,PTPRF,PTPRG,PTPRH,PTPRR,PTPRS,PTPRT,PTPRU,PTPRN,PTPRO,PTPRQ,ACP1,SDHAF2,PPM1F,PPM1G,PPM1D,PPM1E,PPM1J,PPM1K,PPM1L,PPM1M,PPM1A,PPM1B,DUPD1,PTPRZ1,PTPN7,PTPN6,PTPN9,PTPN3,PTPN2,PTPN4,PTPN1,PTPRB,PTPRC,PTPRD,PTPRE,PTPRA,MTMR14,PPP3CB,PPP3CA,PTP4A3,PTP4A1,PTP4A2,PRKCD,MTM1,DLC1,ANKLE2,PPP2CA,PPP2CB,FBXW11,RPRD1B,RPRD1A,ADORA1,RNGTT,PPP1…	-0.72663	0.000120989	0.00539195
blood vessel morphogenesis(GO:0048514)	491	994	101	16348	0.61	390	41581	0.93	SGPL1,ITGB1BP1,HS6ST1,SULF1,DDAH1,PTPRJ,XDH,TSPAN12,TBX20,NR2F2,CYR61,EPHB3,KLF5,TF,PLXND1,PRKD1,CHD7,TBX5,EREG,TGFB2,FBXW7,WARS,APOB,HIF1AN,SEMA3E,BMPER,TEK,HEY2,AQP1,RAPGEF2,HOXA1,HOXA3,HOXA5,HOXA7,MAPK7,GDF2,PTK2B,LOXL2,ACVR1,ENG,PLCD1,AMOT,HIF1A,THSD7A,ZFPM2,COL3A1,PDGFB,ARHGAP22,PGF,CTNNB1,CHRNA7,GTF2I,FASLG,FGF9,NFATC4,NFATC3,ETS1,GATA6,ROBO1,GATA4,MKL2,ROCK1,ROCK2,RTN4,TNFAIP2,PDCD10,NOTCH…	PARVA,NR2E1,HDAC5,TBXA2R,ADM2,HDAC9,HDAC7,SGPL1,SASH1,ZFP36L1,MEOX2,EMP2,FN1,ITGB1BP1,ZMIZ1,TIPARP,HS6ST1,SULF1,DDAH1,PTPRJ,PTPRM,HGF,NRCAM,XDH,ANGPTL6,ANGPTL3,ANGPTL4,VAV3,VAV2,TSPAN12,ADD1,TBX20,NR2F2,CYR61,MED1,WT1,PTPRB,GPI,F3,HYAL1,C3,C6,C5,C1GALT1,CXCL12,CXCL10,CIB1,PRCP,NR4A1,CXCL17,ID1,EPHB3,EPHB4,EPHB1,EPHB2,KLF5,EPHA1,EPHA2,KLF4,TF,MTDH,PLXND1,PRKCA,PRKCB,PRKD1,PRKD2,HRG,POFUT1,MYO18B,A…	-0.417488	0.000124655	0.00547455
negative regulation of protein kinase activity(GO:0006469)	196	436	32	16417	0.19	164	41807	0.39	ITGB1BP1,PTPRJ,NR2F2,SOCS5,ILK,MBIP,SNX6,DEPTOR,LATS2,PKIB,IBTK,TAF7,SFN,TP73,ABL1,CDKN2A,CDKN2B,CDKN2D,CDKN1B,WNK1,BMP7,SPRY4,SPRY2,SPRED2,RGS2,GSK3B,TRIB2,APC,DUS2,DNAJC3,CASP3,DAB2IP	ERRFI1,GBA,ADARB1,PDPK1,TESC,ITGB1BP1,PARK7,PTPRJ,HEXIM2,HEXIM1,PPM1F,PPM1E,ADAR,NR2F2,SOCS4,SOCS5,TFAP4,PTPN6,PTPN1,MEN1,PAK2,PTPRC,ILK,PRKRIP1,HYAL2,EPHA1,MLLT1,MBIP,CHP1,SNX6,IRAK3,SORL1,PRKCA,PRKCD,DEPTOR,LATS1,LATS2,PPP2CA,PRKAR2B,PRKAR2A,HHEX,PRKAR1B,PRKAR1A,SMYD3,CAMK2N2,CAMK2N1,PKIG,PKIB,PKIA,APOE,FBXO7,MYOCD,IBTK,AKT1S1,TAF7,PLK1,TSC2,INPP5K,SFN,UBASH3B,TP73,ABL1,ADIPOQ,ZGPAT,PYCARD,STK3…	-0.699384	0.000125191	0.00547455
positive regulation of locomotion(GO:0040017)	307	678	57	16392	0.35	250	41721	0.6	ITGB1BP1,CAMK2D,PTPRJ,CYR61,ILK,BDKRB1,AGER,TF,PRKCE,PRKD1,SYNE2,JAK2,ELP3,TGFB2,BMPR2,TEK,AQP1,RAPGEF2,ADAM17,ARHGAP5,TFAP2A,DIAPH1,PTK2B,IGF1,AMOT,HIF1A,PDGFB,MMP9,MYADM,CCL20,CCL21,CCL19,RPS6KB1,ETS1,TNFAIP6,HSPA5,LAMB1,THBS4,AIF1,ALOX12,IL16,PTK2,APC,SPAG9,FLT1,SLIT2,DAPK3,PDPN,EPB41L5,CASR,ANGPT1,ZNF268,INSR,PDE4D,DAB2IP,GCNT2,SUN2	AMOTL1,ARHGEF39,FADD,HDAC9,HDAC7,HDAC6,PAX6,FAM110C,SASH1,PHPT1,ITGB1BP1,CAMK1D,CAMK2D,PECAM1,PTPRJ,HGF,ARHGEF7,ANGPTL3,XCL1,PPM1F,CYR61,MIEN1,DSCAM,SCARB1,BVES,PLVAP,PTPRC,PLET1,ILK,F7,F3,HYAL1,C5,PTP4A1,CXCL12,CXCL10,CIB1,CXCL16,BDKRB1,AGER,EPHA1,PLA2G7,TF,PRKCA,PRKCE,PRKD1,PRKD2,SYNE2,IRS1,SEBOX,RRAS2,CREB3,JAK2,ADORA3,MCAM,EDNRA,TIRAP,WNT5A,SOX9,ELP3,ELP6,ELP5,WNT11,ATP8A1,FOXF1,GAS6,MMP14,TG…	-0.544198	0.000126485	0.00549405
tissue morphogenesis(GO:0048729)	533	920	111	16338	0.67	422	41549	1.01	BTBD7,FRS2,BCL10,PAX2,SULF1,RSPO3,RSPO2,TBX20,CYR61,KLHL3,ILK,AR,FREM2,PLXND1,CHRD,CHUK,BBS4,BBS7,HHIP,TBX3,TBX5,CSNK2B,TGFB2,BMPR2,FOXA1,CA2,SEMA3E,DCHS1,TTN,BMP10,ARID1A,HEY2,ESR2,ADAM17,HOXA5,XIRP2,CTHRC1,MYCN,MYF6,IFT122,TFAP2A,GDF2,LHX2,HNF1A,CECR2,ACVR1,ENG,TPM1,IGF1,HIF1A,COBL,ZFPM2,COL3A1,PDGFB,SETDB2,ARHGAP12,PGF,CTNNB1,IFT172,PXN,SMAD4,SMAD1,BMP7,SPRY2,NFATC4,NFATC3,ROBO1,GATA4,MKKS,ROC…	BTBD7,PPP1CA,MTSS1,ENAH,FRS2,NET1,BCL10,PAX3,PAX2,PAX8,FRZB,FST,PARD3,SULF1,BMPR1A,OPA1,HGF,RSPO3,RSPO2,IPMK,VASP,NR3C1,TBX20,CYR61,TBX18,MED1,KLHL3,WT1,AXIN1,PAK1,WLS,PLET1,ILK,MYLK2,AR,LMO4,CXCL12,FREM2,TXNRD1,VANGL2,CELSR1,EPHA2,KLF4,FKBP1A,TMTC3,PLXNA1,PLXNB2,PLXND1,HTT,CHRD,CHUK,PRKD2,NGFR,POFUT2,IGFBP5,DLC1,MAGED1,TGIF1,SYNE4,JAG2,JAG1,DLL1,HHEX,DLL4,BBS4,BBS5,BBS7,PRKAR1A,CDC42,DLG3,DLG5,D…	-0.402095	0.000127367	0.00549545
activation of protein kinase activity(GO:0032147)	259	598	46	16403	0.28	213	41758	0.51	FRS2,LRRK2,ITGB1BP1,ADCY3,ADCY4,ADCY1,ADCY2,ADCY6,MAPKAPK5,MAPKAPK2,JAK2,TGFB3,TGFB2,ADORA2B,TAB1,GAB1,CRK,TP73,GRM4,PTK2B,ACVR2B,PDGFB,PDGFC,GNG3,NOD1,CCL19,KIDINS220,CHRNA7,PXN,PPP2R3C,RAF1,MLK4,MAP3K7,RIPK1,RPS27A,CXCR4,SPAG9,MAP2K3,RIPK3,PIK3CB,LPAR2,ANGPT1,INSR,C1QTNF2,DAB2IP,CCDC88A	KISS1R,GHR,FRS2,LRRK2,C5AR1,MDFI,PDPK1,ITGB1BP1,PARK7,HGF,MAS1,ADCY3,ADCY4,ADCY1,ADCY2,ADCY7,ADCY8,ADCY5,ADCY6,FCER1A,COPS8,ADCY9,MADD,AXIN1,MUL1,PAK3,PTPRC,C5,STRADA,STRADB,MAPKAPK5,MAPKAPK3,MAPKAPK2,SOD1,TOM1L1,IRAK2,IRAK1,PRKCZ,PRLR,PRKAR2B,PRKAR2A,PRKAR1B,PRKAR1A,DLG1,ADRB2,JAK2,ADORA1,WNT5A,MALT1,MARK2,GAS6,TXN,TGFB3,TGFB2,ADORA2B,HACD3,PKN1,LAMTOR2,CHI3L1,CLSPN,MAP3K15,MAP3K10,MAP3K14,MAP3K…	-0.598224	0.000129868	0.00552963
cell chemotaxis(GO:0060326)	174	459	27	16422	0.16	147	41824	0.35	PTPRJ,FCER1G,AGTR1,PRKD1,EDNRB,ELMO2,TGFB2,ADAM17,ITGA9,PTK2B,ENG,PDGFB,CCL27,CCL20,CCL21,CCL19,ANO6,THBS4,AIF1,IL16,IL10,CXCR4,HMGB2,FLT1,SLIT2,PDE4D,CXADR	ARHGEF16,PARVA,C5AR2,C5AR1,PPBP,CAMK1D,PTPRJ,PTPRO,HGF,ARHGEF5,VAV3,VAV1,XCL1,PIP5K1C,PIP5K1A,FCER1G,AGTR1,F7,C5,CXCL11,CXCL12,CXCL10,MTUS1,NR4A1,CXCL14,CXCL16,EPHB1,EPHA2,PLA2G7,PLXNB3,PRKCA,PRKD1,PRKD2,HRG,JAM3,CREB3,EDNRA,EDNRB,TIRAP,WNT5A,SPP1,GAS6,ELMO2,TGFB2,ARRB2,BIN2,MYO9B,CSF3R,SYK,IL23A,TRPM4,NUP85,LGALS3,ADAM10,ADAM17,ITGB2,ITGAM,ITGA1,ITGA9,CORO1B,CORO1A,SCG2,PTK2B,VCAM1,ENG,LYST,PREX…	-0.759747	0.000129042	0.00552963
endomembrane system organization(GO:0010256)	437	897	88	16361	0.53	349	41622	0.83	AP2M1,ATL2,ATL3,RAB3GAP1,NEK9,NEK6,VRK1,SPTBN1,TSPAN15,FCER1G,REEP2,REEP3,AR,PRKD1,ANKLE2,SYNE2,FLOT1,MICALL1,FAM109A,TGFB2,SPTB,HACE1,TRDN,PLS1,DNM1,AQP1,USP8,CLU,SRGN,TM9SF1,RAMP3,ARL1,DENND4C,TMED10,GOLGA5,GOLGA4,PPFIA1,GOLGB1,CLTC,DOPEY2,DOPEY1,ZFYVE27,ASUN,EIF2AK3,LYPLAL1,PACSIN1,SNX10,ARHGAP21,SCP2,MYADM,FASLG,RAE1,KIF5B,PPP2R2A,RTN4,RTN3,ANK1,ANK3,ANO4,ANO6,BAG6,GOPC,RAB27A,JUP,EHD3,BLOC1S…	SCN3B,ARHGEF16,MTSS1,AP2M1,ATL2,ATL1,ATL3,GAK,USP6NL,RAB3GAP2,RAB3GAP1,NEK9,NEK6,VRK1,PDPK1,CTDNEP1,FA2H,LYPLA1,TESC,SPTBN5,SPTBN4,SPTBN1,NPLOC4,MAP7,PIP5K1A,TSPAN33,TSPAN14,TSPAN15,GET4,PALM,FCER1G,AP3D1,DYSF,REEP2,REEP3,REEP4,WRB,GOLPH3L,AR,PKDCC,ACSL3,NBEAL2,LMNA,CIB1,VAMP7,VAMP5,VAMP4,VAMP3,ABCA7,PPIL2,ABCA1,PRKG2,EPHA2,SOD1,HTT,VCPIP1,PRKCI,PRKD1,PRKCZ,DTNBP1,PLEKHM2,ANKLE2,MYO18A,SYNE2,SYNJ…	-0.444007	0.000143746	0.00608055
striated muscle tissue development(GO:0014706)	344	562	66	16383	0.4	278	41693	0.66	HDAC2,ACADM,ZFHX3,FOS,CAMK2D,COPS2,TBX20,NR2F2,MAFF,ILK,WNT8A,ID2,XK,KLF5,MSTN,TBX3,TBX5,TGFB2,DDX17,HIF1AN,TTN,FOXN2,CFLAR,BMP10,HEY2,DCN,DNER,GPCPD1,XIRP1,XIRP2,MYF6,IFT88,ASB2,ACVR1,ELN,TPM1,ZFPM2,RPS6KB1,SMAD1,FGF9,KIAA1161,GATA6,GATA4,AKAP6,MKL2,ERBB4,HOMER1,HAND1,COL14A1,GJA1,POPDC2,DICER1,CDON,FGF20,SAP30,EGR1,EGR2,RYR2,TCF21,EYA2,CACYBP,NACA,MYH11,MYH10,CXADR,CBY1	ATG5,ATG7,HDAC5,HDAC4,HDAC2,ATF3,HDAC9,ACADM,NEXN,MAML1,ZFHX3,NR1D2,MEOX2,NEBL,FOS,CAMK2D,HMG20B,HLF,HLX,BDNF,COPS2,TBX20,NR2F2,TBX18,MED1,ARNTL,WT1,MAFF,BVES,CYP26B1,ILK,MYLK2,PPP3CA,WNT8A,LMNA,CXCL10,VAMP5,NR4A1,S100B,CXCL14,ID2,ID3,XK,KLF5,FKBP1A,BCL9,MTPN,MYLPF,KLHL40,KLHL41,IGFBP5,MYO18B,MSTN,C3orf58,DLL4,PRKAR1A,HIVEP3,CDC42,PITX2,COL11A1,SPEG,BCL9L,TBX3,TBX2,TBX5,TBX1,TENM4,DKK1,WNT5A,SOX6…	-0.503877	0.000144741	0.00608289
response to xenobiotic stimulus(GO:0009410)	140	366	20	16429	0.12	120	41851	0.29	UGP2,NR1I2,SLITRK5,CYP2J2,MTRR,ACSM1,GGCT,EPHX2,CYP2C19,CYP46A1,GSTA4,NNMT,ALDH2,PTGS1,GSTO1,CYP2C8,ACSM2B,MTR,UGT2B4,TBXAS1	UGP2,ADH6,ADH4,NR1I2,CYP39A1,SMOX,MAOA,MAOB,CYP26A1,PAOX,SLITRK5,GSS,CYP26B1,CYP26C1,SULT4A1,CYP2R1,CYP2J2,MTRR,ACSL1,ACSM1,CYP2W1,CYP2S1,CYP2U1,CYP3A4,CYP3A5,CYP3A7,CYP27A1,CYP27B1,ACSS2,ACSS1,GGCT,CYP4B1,EPHX2,SULT2A1,MGST3,CYP4F3,CYP4F2,MGST1,MGST2,RORC,RORA,CYP2C19,CYP2C18,AS3MT,GRIN1,SULT1A1,SULT1C4,MAT1A,MAT2A,MAT2B,ADH1B,BPNT1,NCEH1,CYP7A1,GSTT2B,CYP7B1,HNF4A,CYP8B1,AKR1C1,STAR,PON3,GCLC,G…	-0.856692	0.00014643	0.00611417
stress-activated protein kinase signaling cascade(GO:0031098)	244	560	43	16406	0.26	201	41770	0.48	ATF2,HDAC3,FOS,ARHGEF6,XDH,MAPKAPK2,MID1,GRIK2,TGFB2,ADORA2B,FOXO1,TAB1,GAB1,ANKRD6,MAPK8,MAPK7,TP73,TPD52L1,PTK2B,TAOK1,SH2D3C,NOD1,CCL21,CCL19,RPS6KA1,RPS6KA2,TNXB,MYD88,NCOR1,ZNF622,MLK4,MAP3K7,RIPK1,RPS27A,CCM2,SPAG9,DVL3,MAP2K3,FGF14,ZEB2,CASR,ULK4,DAB2IP	ATF1,ATF2,HDAC3,MDFI,SASH1,FOS,ARHGEF6,XDH,FCER1A,COPS5,AXIN1,MUL1,MEN1,PAK1,STRADB,MAPKAPK3,MAPKAPK2,VANGL2,EPHB1,EPHA4,IRAK4,IRAK2,IRAK1,CDC42,CREB1,TIRAP,WNT5A,ELK1,MEF2C,MEF2A,MID1,GRIK2,TGFB2,ADORA2B,HACD3,PKN1,SEMA4C,MAP3K10,MAP3K13,MAP3K12,MAP3K11,FOXO1,ITCH,FOXM1,ERCC6,SYK,IL1RN,TAB1,TAB2,TAB3,GAB1,ANKRD6,MECOM,MAPK1,MAPK3,MAPK9,MAPK8,MAPK7,PPEF2,ZMYND11,TP73,TPD52L1,PYCARD,PTK2B,GFRAL,PA…	-0.607574	0.000148851	0.0061754
divalent inorganic cation homeostasis(GO:0072507)	314	765	59	16390	0.36	255	41716	0.61	CACNB4,NEU1,ADRA1A,GCK,CAMK2D,SNCA,SLC30A2,SLC30A3,AGTR1,RIC3,XK,BDKRB1,BDKRB2,PLA2G6,FKBP1B,PRKCE,JAK2,EDNRB,EPHX2,GRIK2,TRDN,IBTK,TRPV4,TRPM7,TRPM1,INPP4B,CALM1,SRI,ABL1,DIAPH1,PTK2B,TPT1,ATP7B,GNG3,CCL21,CCL19,GPR12,CHRNA7,GTF2I,GSTO1,NPTN,SLC24A2,AKAP6,CD40,CD55,JPH3,GJA1,JPH1,CXCR4,CUL5,PIK3CB,RYR2,LPAR2,ATP2A1,CASR,PDE4D,CACNA1C,RAP1GDS1,ERO1A	CACNB4,MTSS1,ATG5,NEU1,TBXA2R,ADRA1A,GCK,C5AR1,PDPK1,SLC25A23,SLC25A27,CAMK2D,SYPL2,XCL1,VAPB,SNCA,AP3D1,ITPR3,ITPR1,WFS1,SLC30A4,SLC30A2,SLC30A3,SLC30A7,PTPN6,PTPRC,AGTR1,CCR10,F2,RIC3,OPRM1,C5,OPRL1,CXCL11,CXCL12,CXCL10,PVALB,CYBA,XK,BDKRB1,BDKRB2,PLA2G6,FKBP1A,FKBP1B,TPCN2,CYP27B1,TMTC2,PRKCA,PRKCE,PRKCB,ADCYAP1,KCNA5,MICU1,HERPUD1,DLG4,JAK2,FAM20A,EDNRA,EDNRB,EPHX2,BBC3,GRIK2,TGFB1,GRIN1,GRIN…	-0.529513	0.000151307	0.00623731
regulation of cell cycle process(GO:0010564)	505	1304	105	16344	0.64	400	41571	0.95	ATF2,ANAPC1,ANAPC4,NEK6,MDC1,XPC,CAMK2D,CAMK2B,NEK10,ID2,TRIAP1,MBD4,TOM1L2,PRKCE,XRCC3,BBS4,CDC73,CDC23,RBM38,PSMA2,PSMA6,PSMA3,PSMA7,PSMB7,PSMC6,SETMAR,PSMD2,PSMD7,PSME1,PSME2,PSME4,MSH2,VPS4A,EREG,WAPL,FBXW7,BID,CCNA1,RPS6,CALM1,TP73,IER3,FAP,KANK2,TERF2,IGF1,CDKN2A,CDKN2B,CDKN1B,HUS1,SENP6,PDGFB,RRP8,ZNF830,CTNNB1,FHL1,RPS6KA2,RFWD2,BMP7,DDX39B,ANAPC10,CENPE,CENPJ,CENPV,AURKA,PHIP,GATA6,LSM11…	PARP3,ATRX,ATF2,HDAC8,PRMT2,PRMT5,CUL4A,CUL4B,ANAPC1,ANAPC2,ANAPC5,ANAPC4,ANAPC7,NEK6,MDC1,ZW10,XPC,MDM2,MDM4,CAMK2D,CAMK2B,MEPCE,MAP9,NUBP1,SH2B1,SMC5,SMC3,NUDT16,MED1,NEUROD1,TFAP4,AXIN2,PTPN6,SPICE1,BUB1B,PCID2,ZWINT,MCPH1,WNT9A,KNTC1,PRCC,MUC1,PLRG1,NEK10,NEK11,ID2,TRIAP1,MTBP,NSMCE2,MBD4,TXLNG,BIRC6,TOM1L1,TOM1L2,KLHL22,KLHL21,PRKCE,UBE2C,UBE2B,PRKDC,L3MBTL1,XRCC3,TCF3,BUB1,BUB3,RPRD1B,MTA3,…	-0.403962	0.000155784	0.00638123
cellular response to xenobiotic stimulus(GO:0071466)	135	361	19	16430	0.12	116	41855	0.28	UGP2,NR1I2,CYP2J2,MTRR,ACSM1,GGCT,EPHX2,CYP2C19,CYP46A1,GSTA4,NNMT,ALDH2,PTGS1,GSTO1,CYP2C8,ACSM2B,MTR,UGT2B4,TBXAS1	UGP2,ADH6,ADH4,NR1I2,CYP39A1,SMOX,MAOA,MAOB,CYP26A1,PAOX,GSS,CYP26B1,CYP26C1,SULT4A1,CYP2R1,CYP2J2,MTRR,ACSL1,ACSM1,CYP2W1,CYP2S1,CYP2U1,CYP3A4,CYP3A5,CYP3A7,CYP27A1,CYP27B1,ACSS2,ACSS1,GGCT,CYP4B1,EPHX2,SULT2A1,MGST3,CYP4F3,CYP4F2,MGST1,MGST2,RORC,RORA,CYP2C19,CYP2C18,AS3MT,GRIN1,SULT1A1,SULT1C4,MAT1A,MAT2A,MAT2B,ADH1B,BPNT1,NCEH1,CYP7A1,GSTT2B,CYP7B1,HNF4A,CYP8B1,AKR1C1,STAR,PON3,GCLC,GCLM,TPMT…	-0.874049	0.000161304	0.00652475
xenobiotic metabolic process(GO:0006805)	135	356	19	16430	0.12	116	41855	0.28	UGP2,NR1I2,CYP2J2,MTRR,ACSM1,GGCT,EPHX2,CYP2C19,CYP46A1,GSTA4,NNMT,ALDH2,PTGS1,GSTO1,CYP2C8,ACSM2B,MTR,UGT2B4,TBXAS1	UGP2,ADH6,ADH4,NR1I2,CYP39A1,SMOX,MAOA,MAOB,CYP26A1,PAOX,GSS,CYP26B1,CYP26C1,SULT4A1,CYP2R1,CYP2J2,MTRR,ACSL1,ACSM1,CYP2W1,CYP2S1,CYP2U1,CYP3A4,CYP3A5,CYP3A7,CYP27A1,CYP27B1,ACSS2,ACSS1,GGCT,CYP4B1,EPHX2,SULT2A1,MGST3,CYP4F3,CYP4F2,MGST1,MGST2,RORC,RORA,CYP2C19,CYP2C18,AS3MT,GRIN1,SULT1A1,SULT1C4,MAT1A,MAT2A,MAT2B,ADH1B,BPNT1,NCEH1,CYP7A1,GSTT2B,CYP7B1,HNF4A,CYP8B1,AKR1C1,STAR,PON3,GCLC,GCLM,TPMT…	-0.874049	0.000161304	0.00652475
regulation of lipid metabolic process(GO:0019216)	248	509	44	16405	0.27	204	41767	0.49	ACADL,NR1H4,SNCA,CYR61,AGTR1,ID2,PLA2G6,PRKCE,BBS4,EPHX2,FBXW7,APOB,APOA2,TEK,PTK2B,CNEP1R1,EIF2AK3,PDGFB,SREBF1,SCP2,CCL21,CCL19,BMP5,NPC2,LDLR,SERPINA3,PPARG,TYSND1,SIRT4,ERBB4,BSCL2,RBL2,ANKRD26,PTK2,PEX2,FLT1,FLT3,INSIG2,LDLRAP1,ATP1A1,PDP2,C1QTNF2,DAB2IP,CREBL2	DHCR7,ACADL,NR1H2,NR1H4,NR1H3,NR1D1,NR1D2,CTDNEP1,GFI1,OPA3,ANGPTL3,VAV3,VAV2,ACADVL,NR3C1,SNCA,HCAR2,NFKB1,CYR61,SCARB1,AGTR1,CRTC3,C3,ACSL3,ACSL6,ID2,EPHA8,GHSR,KLF4,PLA2G6,ATG14,CYP27B1,SOD1,TSPO,MTOR,PRKCE,PRKCD,LMF1,DLAT,CPT1A,IRS1,BBS4,CDC42,PSAP,CREB1,ADORA1,ABCG1,ABCD2,DKK3,EPHX2,RORC,RORA,TGFB1,FBXW7,APOB,APOD,APOE,LAMTOR1,GOLM1,SNAI2,SNAI1,STOML2,APOA4,APOA2,APOA5,TEK,WDTC1,SF1,SEC14L2,…	-0.59941	0.000166336	0.00668648
positive regulation of cell motility(GO:2000147)	288	653	53	16396	0.32	235	41736	0.56	ITGB1BP1,CAMK2D,PTPRJ,CYR61,ILK,BDKRB1,TF,PRKCE,PRKD1,SYNE2,JAK2,ELP3,TGFB2,BMPR2,TEK,AQP1,RAPGEF2,ADAM17,ARHGAP5,TFAP2A,DIAPH1,PTK2B,IGF1,AMOT,HIF1A,PDGFB,MMP9,MYADM,CCL20,CCL21,CCL19,RPS6KB1,ETS1,TNFAIP6,HSPA5,LAMB1,THBS4,AIF1,ALOX12,PTK2,APC,SPAG9,FLT1,DAPK3,PDPN,EPB41L5,ANGPT1,ZNF268,INSR,PDE4D,DAB2IP,GCNT2,SUN2	AMOTL1,ARHGEF39,FADD,HDAC9,HDAC7,HDAC6,PAX6,FAM110C,SASH1,PHPT1,ITGB1BP1,CAMK1D,CAMK2D,PECAM1,PTPRJ,HGF,ARHGEF7,ANGPTL3,XCL1,PPM1F,CYR61,MIEN1,SCARB1,PLVAP,PTPRC,PLET1,ILK,F7,F3,HYAL1,PTP4A1,CXCL12,CXCL10,CIB1,CXCL16,BDKRB1,EPHA1,PLA2G7,TF,PRKCA,PRKCE,PRKD1,PRKD2,SYNE2,IRS1,SEBOX,RRAS2,CREB3,JAK2,ADORA3,MCAM,EDNRA,TIRAP,WNT5A,SOX9,ELP3,ELP6,ELP5,WNT11,ATP8A1,FOXF1,GAS6,MMP14,TGFB1,TGFB2,BMPR2,MYO…	-0.554967	0.000169473	0.00677054
negative regulation of multicellular organismal process(GO:0051241)	363	757	71	16378	0.43	292	41679	0.7	NEU1,HDAC2,ADRA1A,PAX2,ACP5,WWC1,WWC2,PPM1B,MYLIP,MC1R,FKBP1B,PRNP,MSTN,JAK2,ENPP1,ABCG8,ABCG5,TBX5,SLC6A4,USF1,TGFB3,TGFB2,ADORA2B,BMPR2,PLAT,NDFIP1,BMP10,APOA2,ADAM17,SRI,SRGN,PLAC8,FAP,PTK2B,POMC,LGMN,C10orf54,EIF2AK3,HIF1A,WNK1,PDGFB,UBE2D3,CHRNA7,BMP7,RAI1,PPARD,PPARG,GATA6,ANKRD26,RGS2,AXL,GSK3B,IL10,RPS27A,PTK2,OSR1,RGCC,GJA1,NCF1,GUCY1A3,CDH3,TAX1BP1,ATP1A1,IFIH1,ATP2A1,FLCN,TSPAN8,PDE4D,…	TICAM2,NLRC5,ATG5,NEU1,HDAC2,ADRA1A,ADRA1D,HDAC7,PAX2,PAX8,GBA,FRZB,C5AR2,NR1H3,FXN,AVPR2,SPTBN4,NLRP3,ATXN2,PTPRO,ACP5,PROCR,NLRX1,PGLYRP2,MAVS,XCL1,WWC1,WWC2,WWC3,PPM1B,NFKB1,MEFV,NFE2,MUL1,MEN1,MYLIP,MC1R,F2,IL12A,KLK8,CYBA,PRKG1,BCOR,GHSR,KLF4,ATG12,FKBP1B,BCL6,SOD1,TSPO,IRAK3,PROC,NGFR,PRNP,HRG,IRF3,MSTN,DLL1,SEBOX,HMOX1,BBS2,ADRB2,JAK2,JAK3,ADORA1,CD2AP,ENPP1,ABCG8,ABCG5,CYLD,TBX5,TBK1,SLC6…	-0.480015	0.000174174	0.00691567
regulation of translation(GO:0006417)	269	668	49	16400	0.3	220	41751	0.52	LARP1,VARS,MAPKAPK5,ABCF1,GATC,MTIF2,MTIF3,RPS5,CNOT8,CNOT2,CNOT1,CAPRIN2,LIN28A,EIF3E,EIF3L,EIF4H,PTK2B,DDX25,UHMK1,EIF2AK3,PAIP2,EIF4EBP3,UPF3B,RPS6KA1,RPS6KB1,IREB2,TOB1,EIF4G1,UPF1,ETF1,TNRC6C,RGS2,MTRF1,RPS27L,TIA1,DDX1,PUM2,LRPPRC,PURA,POLR2G,AGO2,ILF3,DAPK3,VARS2,EIF5,EIF2B2,EIF2B4,EIF2B5,MAGOH	BARHL2,PASK,ENC1,SARNP,CPEB2,CPEB3,ZFP36L1,LARP1,LARS2,ATXN2,LSM14B,VARS,FAM129A,SECISBP2,WT1,PABPC1,MAPKAPK5,PAIP2B,IARS,IARS2,MTG1,EEFSEC,BCL3,MTPN,MTOR,PATL2,NGDN,IGFBP5,CNOT10,CNOT11,IMPACT,RBM8A,ABCF1,RBM4B,TRMT6,PSTK,CNOT6L,BTG2,NANOS3,GATC,USP16,MKNK2,MKNK1,TACO1,FOXO3,RBMS3,FECH,TPR,MTIF2,MTIF3,RPS9,RPS5,CNOT8,CNOT3,CNOT2,CNOT1,CNOT7,CNOT6,TSC1,IGF2BP2,IGF2BP3,CAPRIN1,CAPRIN2,GUF1,MAPK1,S…	-0.567365	0.000178062	0.00702693
cellular amino acid metabolic process(GO:0006520)	516	1392	108	16341	0.66	408	41563	0.97	PARS2,ACAT1,NR1H4,PPA1,DHFR,GFPT1,SLC25A21,SLC25A32,ASNSD1,SLC25A15,DDAH2,DDAH1,HGD,CKMT2,HDC,VARS,TDO2,MTRR,MTAP,SLC5A6,GGACT,GGCT,MSRA,AMDHD1,PSMA2,PSMA6,PSMA3,PSMA7,PSMB7,PSMC6,PSPH,PSMD2,PSMD7,PSME1,PSME2,PSME4,VNN1,VNN2,GATB,GATC,GARS,GART,CAD,WARS,HIBADH,DLST,PLS1,SHMT1,TAT,SERINC5,SERINC1,FPGS,ALDH7A1,CTH,CPQ,GLRX2,ABAT,ARG1,ART4,MTHFD1,P4HA2,DARS2,ASPG,KYNU,ASNS,GCAT,AASS,HARS2,DPYS,AZIN1…	SARS2,ADSS,GGH,BCKDK,GHR,PARS2,ATG7,GLUD2,GLUD1,PAX8,ACAD8,ATIC,ADI1,PPCS,ACAT1,PPAT,NR1H4,PPA2,PPA1,DHFR,GFPT1,EEF1E1,GFPT2,SLC25A21,SLC25A32,ASNSD1,SLC25A10,SLC25A15,LARS2,PARK7,DDAH2,DDAH1,PRODH,ACADSB,HGD,QARS,CKMT2,MARS,FTCD,HAL,EARS2,DUOX2,DUOX1,HDC,VARS,MED1,NFS1,ACY1,GLS,DIO1,GSS,GSR,TDO2,HAGHL,GPT,AASDHPPT,MTRR,FOLH1,IARS,IARS2,COASY,G6PD,MTAP,PLA2G5,TH,SOD1,SOD2,FOLR1,HTT,HPD,HPN,SLC5A6…	-0.395603	0.000182258	0.00714891
GO:0032318	367	1104	72	16377	0.44	295	41676	0.7	RALGPS1,SPATA13,RAB3GAP1,ITGB1BP1,RANBP10,ARHGEF4,ARHGEF6,SH3BGRL3,DOCK11,RIC1,DNMBP,EPHB3,EPHA5,RIN3,CHN1,RABGAP1L,PLEKHG3,RASGRF2,RAB3IP,KCTD7,FOXJ1,SYDE2,ARAP3,ARAP2,TBC1D9,TBC1D4,TBC1D7,RAPGEF2,GAPVD1,ASAP2,AKAP13,TBC1D15,LLGL1,TBC1D2B,ST5,ARHGAP6,ARHGAP5,CRK,DENND5B,DENND4C,PTK2B,DENND1A,DENND3,SMAP1,PREX2,OPHN1,ARHGAP15,CCL21,CCL19,DOCK9,GMIP,RABGAP1,FGD5,FGD4,SPRY2,ECT2L,FARP1,EZH2,GSK3B,R…	ARHGEF40,RALGPS1,ARHGEF26,ARHGEF25,ARHGEF28,ARHGEF33,ARHGEF39,ARHGEF37,ERRFI1,ARHGEF18,ARHGEF19,ARHGEF16,ARHGEF17,ARHGEF15,ARHGEF12,ARHGEF10,ARHGEF11,KNDC1,NET1,SPATA13,USP6NL,RAB3GAP2,RAB3GAP1,ACAP3,ACAP1,ACAP2,RALBP1,ITGB1BP1,PECAM1,RANBP10,ARHGEF4,ARHGEF3,ARHGEF2,ARHGEF1,ARHGEF7,ARHGEF6,ARHGEF5,ARHGEF9,VAV3,VAV2,VAV1,PIP5K1A,SH3BGRL3,DOCK10,DOCK11,MADD,BVES,RIC1,ARFGAP1,ARFGAP2,ARFGAP3,DNMBP,E…	-0.476262	0.000187168	0.00729731
cell-type specific apoptotic process(GO:0097285)	417	800	84	16365	0.51	333	41638	0.79	SCN2A,BCL10,PAX2,SIGMAR1,FYN,CAMK2A,CNTFR,SNCA,FCER1G,ILK,NR4A2,EPHA7,PRKCH,PRKCQ,XRCC4,XRCC2,JAK2,MSH2,GRIK2,TGFB3,TGFB2,FBXW7,BID,IL2RA,RPS6,TEK,HEY2,RAPGEF2,ADAM17,SET,MAPK7,TP73,TFAP2A,ABL1,GRM4,FAP,PTK2B,POLB,LGMN,IGF1,CDKN2A,HIF1A,STXBP1,STK17A,CCL21,CCL19,RPS6KA2,KITLG,OXR1,SMAD1,BMP7,FASLG,ROCK1,APOPT1,ANO6,HAND2,ATM,RIPK1,ALOX12,AXL,IL10,TRAF3IP2,CD40,RGCC,HCLS1,GABRB2,DICER1,RHOB,RIPK3,…	BARHL1,SCN2A,ATN1,AIFM1,ADNP,BCL10,FADD,PAX2,PAX8,C5AR1,PIAS4,IER3IP1,CPEB4,PDPK1,SIGMAR1,FYN,TNIP2,NLRP1,CAMK2A,STAMBP,PARK7,PPT1,CNTFR,ANGPTL4,NR3C1,SNCA,BDNF,HCAR2,FCER1G,FNDC1,NEUROD1,MAEA,WFS1,NRBP2,WT1,PAK3,GPI,ILK,IL12A,CXCL12,NR4A2,EPHA7,G6PD,CHL1,BCL6,SOD1,SOD2,ZC3H8,MTCH2,HTT,PRKCA,PRKCI,PRKCH,PRKCG,PRKCD,PRKCQ,FAIM2,TCP1,IRF7,IRF3,XRCC4,XRCC2,ADCYAP1,JAG2,UNC5B,CFDP1,CDC42,HMOX1,MSX2,C…	-0.443457	0.000195294	0.00747401
mitotic nuclear division(GO:0007067)	404	989	81	16368	0.49	323	41648	0.77	MAPRE3,ANAPC1,ANAPC4,NEK9,NEK6,VRK1,MAU2,MIS18BP1,KLHL9,DSCC1,REEP3,LZTS2,HAUS6,PDS5B,TOM1L2,KLHL42,ANKLE2,LATS2,LRRCC1,CDC23,CLASP1,EREG,TXNL4B,WAPL,WASL,FBXL7,TTN,CCNA1,RPS6,INCENP,ABL1,CLTC,ASUN,PPP1R12A,IGF1,FIGN,DCTN3,PDGFB,SETDB2,ZNF830,DCLRE1A,BMP7,ANAPC10,CENPC,CENPE,CENPV,CENPW,CENPT,PPP2R2D,AURKA,RAN,TUBB3,PHIP,MPLKIP,ANLN,CHEK1,ATM,RGCC,CCNK,SPC24,CDK13,PINX1,APC,CDK3,PTTG1,NUP37,DAPK3…	GEM,ARHGEF10,FSD1,PRMT5,MAPRE2,MAPRE1,MAPRE3,ANAPC1,ANAPC2,ANAPC5,ANAPC4,NEK9,ANAPC7,NEK4,NEK6,NEK1,VRK1,CSNK1A1,MCMBP,ZW10,EML4,HGF,MAP9,ARHGEF2,MAU2,SH2B1,SMC5,SMC2,SMC3,SMC4,MIS18BP1,KLHL9,DSCC1,ENSA,REEP3,REEP4,SPICE1,HEPACAM2,BUB1B,ZWINT,ARL8A,LZTS2,LMLN,KNTC1,TTYH1,HAUS7,HAUS8,HAUS4,HAUS3,HAUS6,HAUS5,HAUS1,MTBP,NSMCE2,PDS5B,PDS5A,BIRC6,TOM1L1,TOM1L2,SNX9,KLHL22,KLHL21,VCPIP1,UBE2I,UBE2C,KLH…	-0.449278	0.000194593	0.00747401
negative regulation of transferase activity(GO:0051348)	304	687	57	16392	0.35	247	41724	0.59	POT1,ANAPC1,ANAPC4,ITGB1BP1,PTPRJ,NR2F2,SOCS5,ILK,MBIP,SNX6,DEPTOR,LATS2,CDC23,PSMA2,PSMA6,PSMA3,PSMA7,PSMB7,PSMC6,PSMD2,PSMD7,PSME1,PSME2,PKIB,CERS1,GBAS,IBTK,TAF7,SFN,TP73,ABL1,PRPSAP1,CDKN2A,CDKN2B,CDKN2D,CDKN1B,WNK1,LIMK1,BMP7,ANAPC10,SPRY4,SPRY2,PPARG,BAG5,SPRED2,PSMB10,RGS2,GSK3B,RPS27A,TRIB2,PINX1,APC,DUS2,PSMD14,DNAJC3,CASP3,DAB2IP	ERRFI1,POT1,GBA,ADARB1,ANAPC1,ANAPC2,ANAPC5,ANAPC4,ANAPC7,PDPK1,TESC,PHPT1,ITGB1BP1,PARK7,PTPRJ,HEXIM2,HEXIM1,PPM1F,PPM1E,ADAR,NR2F2,SOCS4,SOCS5,TFAP4,PTPN6,PTPN1,MEN1,PAK2,BUB1B,PTPRC,ILK,PRKRIP1,HYAL2,EPHA1,MLLT1,MBIP,CHP1,SNX6,IRAK3,SORL1,PRKCA,UBE2C,PRKCD,DEPTOR,LATS1,LATS2,PPP2CA,BUB3,PRKAR2B,PRKAR2A,HHEX,PRKAR1B,PRKAR1A,CDC16,SMYD3,CDC23,CDC20,CDC26,CDC27,PSMA2,PSMA1,PSMA6,PSMA5,PSMA4,PSMA3…	-0.532054	0.00019632	0.00747401
glucose metabolic process(GO:0006006)	226	514	39	16410	0.24	187	41784	0.45	EPM2AIP1,ADRA1B,ACADM,UGP2,GCK,MDH1,STEAP4,GFPT1,SLC25A13,ENPP1,PFKFB3,PFKFB2,PPP1CB,USF1,HIBADH,GBE1,FOXO1,CALM1,GALM,POMC,DUSP12,IGF1,PPARD,GPD2,RPE,GOT2,GSK3B,RPS27A,KHK,GLYR1,NCOA2,CRYM,PHKG1,PMAIP1,PCK2,PCK1,INSR,DYRK2,C1QTNF2	PPP1CA,PASK,EPM2AIP1,ATF3,ADRA1B,ACADM,PGM2L1,GAA,UGP2,GCK,MDH2,MDH1,STEAP4,NR1D1,GFPT1,SLC25A12,SLC25A11,SLC25A13,SLC25A10,HK2,NR3C1,GYG2,GYG1,GYS1,GYS2,PTPN2,ENO2,ENO3,ENO1,GPI,PGAM1,PGAM2,CRTC2,PC,GDPGP1,G6PC,G6PD,OMA1,MTOR,IGFBP4,IGFBP5,DLAT,SORD,CPT1A,IRS1,ENPP1,PFKFB4,PFKFB3,PFKFB2,PFKFB1,PPP1CB,WDR5,RORC,RORA,USF1,MIDN,SOGA1,PKLR,HIBADH,APOD,TKT,GBE1,RPIA,FOXO1,GRHPR,INPP5K,WDTC1,H6PD,CALM…	-0.632924	0.000194081	0.00747401
ubiquitin-dependent protein catabolic process(GO:0006511)	496	1323	103	16346	0.63	393	41578	0.94	LRRK2,WWP2,WWP1,ANAPC1,ANAPC4,ATXN3,UFL1,ERLEC1,SUMO1,KLHL3,SOCS5,MYLIP,TTC3,KLHL20,UBE2W,COMMD1,KLHL42,BBS7,RNF217,CDC23,PSMA2,PSMA6,PSMA3,PSMA7,PSMB7,PSMC6,PSMD2,PSMD7,PSME1,PSME2,PSME4,USP53,USP12,USP14,USP21,USP22,USP25,USP24,USP38,CSNK1E,USP46,USP43,USP45,FBXW7,HACE1,FBXL7,FBXL3,FBXO8,NDFIP1,UBA6,ERLIN1,ATRAID,USP7,USP8,USP3,CLU,MVB12B,RNF6,RNF5,ASB2,HECW1,PTK2B,UCHL5,UCHL3,UBE2J1,FBXO11,UBX…	LRRK2,HDAC6,CUL4A,CUL4B,FAF1,NELL1,WWP2,WWP1,ANAPC1,ANAPC2,ANAPC5,ANAPC4,PIAS1,ANAPC7,SEC61B,MDM2,PARK7,ATXN3,NPLOC4,RLIM,CLOCK,LNX1,UFL1,ZRANB1,TBL1X,ERLEC1,PAN2,SUMO2,SUMO1,WFS1,KLHL3,KLHL8,SOCS4,SOCS5,ARNTL,AXIN1,BUB1B,MYLIP,FOXRED2,TTC3,BIRC2,TOM1L1,KLHL20,UBE2A,UBE2I,UBE2H,UBE2C,UBE2B,UBE2N,UBE2K,UBE2W,COMMD1,UBE2S,UBE3A,UBE3C,KLHL42,UBE4A,UBE4B,PPP2CB,FBXW11,BUB3,MTA1,BBS7,HERPUD1,CHFR,RNF2…	-0.405493	0.000199657	0.00755659
positive regulation of organelle organization(GO:0010638)	329	803	63	16386	0.38	266	41705	0.63	POT1,JDP2,RAB3GAP1,ITGB1BP1,CFL2,CAMK2B,MAPT,PPP3CC,PLA2G6,PICK1,PRKCE,JMY,DNM1L,EREG,BID,PLEK,TRPV4,BMP10,TEK,ACTR3,ACTR2,SFN,MAPK8,ARF1,ABI2,FHOD1,WDR61,PTK2B,LPIN1,TERF2,EVL,TPM1,IGF1,AMOT,CDKN1B,PDGFB,SREBF1,CCL21,LIMK1,MOAP1,AURKA,NCOR1,PHIP,YWHAQ,SLAIN2,ROCK2,APOPT1,ANK1,SYT1,RGS2,GSK3B,RGCC,HCLS1,APC,CUL3,ASXL2,BNIP3,PDXP,CASP8,PMAIP1,INSR,ARPC5L,TINF2	KISS1R,ARHGEF15,ARHGEF10,POT1,ATRX,MTSS1,JDP2,RAB3GAP2,RAB3GAP1,JARID2,PPIF,ITGB1BP1,CFL2,CAMK2B,MAPT,VASP,PPM1F,PPM1E,SH2B1,HCK,SMC5,MUL1,MEN1,PAK1,PPP3CC,STMN2,MUC1,MTF2,EPHA1,NSMCE2,PLA2G6,BCL6,PLXNA3,PICK1,TNKS2,SNW1,DNMT1,MTOR,PRKCE,UBE2B,UBE2N,ATPIF1,JMY,MARCH5,NIPBL,DLG1,MSX2,AP1AR,TENM1,WNT5A,BBC3,WNT11,SYNPO,DNM1L,BTC,EREG,PHF19,TGFB1,MLST8,ARRB1,TFDP1,TAL1,BID,PLEK,SNAI2,BIK,BMF,WHAMM,T…	-0.506168	0.000213562	0.00803588
regulation of stress-activated MAPK cascade(GO:0032872)	170	373	27	16422	0.16	143	41828	0.34	HDAC3,XDH,MID1,GRIK2,TGFB2,FOXO1,GAB1,ANKRD6,TP73,TPD52L1,PTK2B,TAOK1,NOD1,CCL21,CCL19,TNXB,MYD88,NCOR1,ZNF622,MLK4,MAP3K7,RIPK1,SPAG9,DVL3,ZEB2,ULK4,DAB2IP	HDAC3,MDFI,SASH1,XDH,FCER1A,COPS5,AXIN1,MUL1,MEN1,PAK1,VANGL2,EPHB1,EPHA4,CDC42,TIRAP,WNT5A,MID1,GRIK2,TGFB2,HACD3,PKN1,SEMA4C,MAP3K10,MAP3K11,FOXO1,ITCH,FOXM1,ERCC6,SYK,IL1RN,GAB1,ANKRD6,MECOM,MAPK1,MAPK3,MAPK9,PPEF2,ZMYND11,TP73,TPD52L1,PYCARD,PTK2B,PAFAH1B1,STK3,PLCB1,EIF2AK2,DUSP10,DUSP19,DUSP15,TAOK2,TAOK1,TAOK3,DUSP22,MDFIC,EDN1,VEGFA,AMBP,CARD9,TNIK,SH3RF1,NOD2,NOD1,CCL21,CCL19,DAB2,TRAF2,…	-0.732064	0.00022104	0.00822168
coenzyme biosynthetic process(GO:0009108)	113	350	15	16434	0.09	98	41873	0.23	DHFR,SNCA,ELOVL4,ELOVL2,GART,FPGS,MTHFD1,KYNU,COQ5,COQ4,COQ3,COQ2,GPHN,PDP2,ME1	ATIC,PPCS,DHFR,ASPDH,ACLY,TECR,SNCA,NFS1,UBIAD1,ACSL1,ACSL4,ACSL6,ACSL5,COASY,ACSS2,ACSS1,NMRK1,NMRK2,DLAT,ELOVL1,ELOVL5,ELOVL4,ELOVL2,ELOVL7,ELOVL6,NMNAT3,NMNAT2,NMNAT1,QDPR,CYP4F2,GART,NADSYN1,MAT1A,TGFBR1,MAT2A,MAT2B,SPR,FPGS,LIAS,DLD,FAS,WDR87,MTHFD1,MTHFD2,MTHFD1L,KYNU,TPK1,GCDH,GCH1,FASN,UCK2,PDHA1,PCBD2,PCBD1,COQ9,COQ7,COQ5,COQ6,COQ4,COQ3,COQ2,PPCDC,MOCOS,MOCS1,MOCS3,MOCS2,QPRT,PNP,PTS,GPH…	-0.941628	0.000220069	0.00822168
regulation of stress-activated protein kinase signaling cascade(GO:0070302)	171	375	27	16422	0.16	144	41827	0.34	HDAC3,XDH,MID1,GRIK2,TGFB2,FOXO1,GAB1,ANKRD6,TP73,TPD52L1,PTK2B,TAOK1,NOD1,CCL21,CCL19,TNXB,MYD88,NCOR1,ZNF622,MLK4,MAP3K7,RIPK1,SPAG9,DVL3,ZEB2,ULK4,DAB2IP	HDAC3,MDFI,SASH1,XDH,FCER1A,COPS5,AXIN1,MUL1,MEN1,PAK1,VANGL2,EPHB1,EPHA4,CDC42,TIRAP,WNT5A,MID1,GRIK2,TGFB2,HACD3,PKN1,SEMA4C,MAP3K10,MAP3K11,FOXO1,ITCH,FOXM1,ERCC6,SYK,IL1RN,GAB1,ANKRD6,MECOM,MAPK1,MAPK3,MAPK9,PPEF2,ZMYND11,TP73,TPD52L1,PYCARD,PTK2B,PAFAH1B1,STK3,PLCB1,EIF2AK2,DUSP10,DUSP19,DUSP15,TAOK2,TAOK1,TAOK3,DUSP22,MDFIC,EDN1,VEGFA,AMBP,CARD9,TNIK,SH3RF1,NOD2,NOD1,CCL21,CCL19,DAB2,TRAF2,…	-0.739056	0.000224911	0.00831786
regulation of multi-organism process(GO:0043900)	289	775	54	16395	0.33	235	41736	0.56	NEU1,AP2M1,FYN,APOBEC3H,APOBEC3C,PPIA,NELFE,PPM1B,ZP2,AP1G1,AP1M2,EDNRB,ZCCHC11,ELMO1,PLAT,IL2RA,PLS1,CCNT1,ARF1,TAF11,LY96,GTF2H4,ASUN,ACVR1C,SRPK1,ELMOD2,PPP2R3C,AURKA,MYD88,TRIM13,TRIM28,TRIM26,IL15,IL10,HLA-A,SMARCA4,CD55,TRIM35,TRIM31,SP100,TCEB1,DICER1,CDK9,POLR2H,POLR2G,POLR2F,ILF3,DERL1,INHBA,TMEM173,TEKT3,PDE5A,CHMP2A,NFKBIL1	AP2S1,NEU1,IFITM1,IFITM2,IFITM3,AP2M1,HDAC1,ADARB1,SASH1,SUPT16H,AP2A2,AP2A1,FYN,APOBEC3H,APOBEC3C,PPIH,PPIA,PPID,NELFA,NELFB,NELFE,TNIP1,NLRX1,MAVS,RSPO1,PPM1B,TSPAN32,HCK,VAPB,YTHDC2,ADAR,TFAP4,MUL1,PAK2,CIB1,IFI16,MB21D1,BIRC3,BIRC2,SNX3,SNW1,PRKCA,MBL2,HPN,IRF8,IRF3,AP1S3,AP1S1,AP1S2,ZP2,NR5A2,RNASEL,AP1G1,AP1M1,AP1M2,CREB3,AP1B1,EDNRB,ZCCHC11,TIRAP,CD247,VPS4B,ELMO1,MID2,PLSCR1,IL12RB1,HS3ST…	-0.536214	0.000229895	0.00845386
response to peptide hormone(GO:0043434)	416	849	84	16365	0.51	332	41639	0.79	FRS2,NEU1,EPM2AIP1,GCK,FYN,GFPT1,ADCY3,ADCY4,ADCY1,ADCY2,ADCY6,AR,MBD5,GHRHR,PRKCQ,IGFBP1,HADHA,JAK2,ENPP1,USF1,EREG,PLAT,ATP6V0D1,ATP6V0D2,FOXO1,RPS6,TBC1D4,TEK,MZB1,GAB1,ATP6V1C2,ADAM17,CAB39L,ATP6V1G2,ATP6V1G1,ATP6V1E1,ATP6V1E2,CRK,ARG1,DENND4C,SLC2A8,LPIN1,ACVR1C,CDKN1B,PDGFB,SREBF1,CTNNB1,GNG3,RPS6KB1,PXN,BMP7,EIF4G1,FGF9,EEF2K,RAF1,PPARG,PHIP,ANKRD26,CPS1,TRIM16,IL10,PTK2,CD55,GJA1,VWA2,RHO…	GGH,PARP1,GHR,CFTR,FRS2,NEU1,EPM2AIP1,TFF3,HDAC5,HDAC9,PAX6,GCK,PPAT,CPEB2,PDPK1,FYN,GFPT1,MDM2,PTPRN,AP3S1,FFAR3,GNG13,GNG11,GNG12,MAS1,GNG10,PPM1A,SH2B2,ADCY3,ADCY4,ADCY1,ADCY2,ADCY7,ADCY8,ADCY5,ADCY6,NFKB1,ADCY9,SOCS2,PTPN6,PTPN2,PTPN1,PAK1,BDH1,PTPRE,PTPRA,F7,AR,SORT1,ACSL6,STRADA,STRADB,IDE,CXCL12,MTUS1,CYC1,GHSR,MBD5,TH,GHRHR,MTOR,PRKCA,PRKCI,PRKCD,UBE2B,PRKCB,PRKCQ,NGFR,PRKCZ,PRKDC,PRLR,IG…	-0.440426	0.000236819	0.00865927
stress-activated MAPK cascade(GO:0051403)	242	557	43	16406	0.26	199	41772	0.47	ATF2,HDAC3,FOS,ARHGEF6,XDH,MAPKAPK2,MID1,GRIK2,TGFB2,ADORA2B,FOXO1,TAB1,GAB1,ANKRD6,MAPK8,MAPK7,TP73,TPD52L1,PTK2B,TAOK1,SH2D3C,NOD1,CCL21,CCL19,RPS6KA1,RPS6KA2,TNXB,MYD88,NCOR1,ZNF622,MLK4,MAP3K7,RIPK1,RPS27A,CCM2,SPAG9,DVL3,MAP2K3,FGF14,ZEB2,CASR,ULK4,DAB2IP	ATF1,ATF2,HDAC3,MDFI,SASH1,FOS,ARHGEF6,XDH,FCER1A,COPS5,AXIN1,MUL1,MEN1,PAK1,STRADB,MAPKAPK3,MAPKAPK2,VANGL2,EPHB1,EPHA4,IRAK4,IRAK2,IRAK1,CDC42,CREB1,TIRAP,WNT5A,ELK1,MEF2C,MEF2A,MID1,GRIK2,TGFB2,ADORA2B,HACD3,PKN1,SEMA4C,MAP3K10,MAP3K13,MAP3K12,MAP3K11,FOXO1,ITCH,FOXM1,ERCC6,SYK,IL1RN,TAB1,TAB2,TAB3,GAB1,ANKRD6,MECOM,MAPK1,MAPK3,MAPK9,MAPK8,MAPK7,PPEF2,ZMYND11,TP73,TPD52L1,PYCARD,PTK2B,PAFAH1B1…	-0.597526	0.000241054	0.00876462
regulation of anatomical structure size(GO:0090066)	369	781	73	16376	0.44	296	41675	0.71	LRRK2,ADRA1B,ADRA1A,PAX2,SPTBN1,ITGB1BP1,CFL2,MANF,MAPT,SH3BGRL3,SPTAN1,AGTR1,ILK,XK,BDKRB2,PLA2G6,PICK1,PRKCE,DEPTOR,JMY,EDNRB,SLC6A4,EPHX2,SPTB,ADORA2B,BMPR2,PLEK,TNR,TRPV2,DCC,ACTR3,ACTR2,ARHGAP5,ARF1,ABI2,TP73,RNF6,SSH2,HTR1B,SPG20,PTK2B,ELN,EVL,AMOT,E2F4,MYADM,CCL21,LIMK1,CAPZB,PPARD,MKKS,RTN4,RDX,CPS1,RGS2,ALOX12,GSK3B,GJA1,HCLS1,GUCY1A3,SLIT2,PDXP,TRIOBP,RAB3B,CASR,ULK1,ULK2,CACNA1C,ARPC5L…	BARHL2,CFTR,ATG5,NET1,LRRK2,ADRA1B,TBXA2R,ADRA1A,ADRA1D,PAX2,SCPEP1,ANAPC2,FN1,SPTBN5,SPTBN4,SPTBN2,SPTBN1,ITGB1BP1,CFL2,NEFM,PECAM1,PTPRM,MANF,MAPT,CAPZA2,CAPZA1,NRCAM,TWF1,TWF2,VASP,HBB,HCK,ACE2,SH3BGRL3,BDNF,ADD2,ADD1,DSCAM,PAK3,GSN,SPTAN1,AGTR1,ILK,CXCL12,SPECC1L,AVIL,PRKG1,XK,BDKRB2,PLA2G6,SOD1,SOD2,PLXNA3,PLXNA4,PICK1,MTPN,MTOR,PRKCE,PRKCD,ADCYAP1,KCNJ8,DEPTOR,LATS1,JMY,PLEKHH2,KCNA5,HMOX1,…	-0.465815	0.000245053	0.0088024
single organism cell adhesion(GO:0098602)	370	918	73	16376	0.44	297	41674	0.71	ANTXR1,ITGB1BP1,BMPR1B,CYR61,NINJ2,ILK,LMO7,EPHB3,EPHA7,CYFIP2,PRKCQ,MERTK,JAK2,VNN1,TGFB2,FOXA1,MYO10,PLEK,TNR,VMP1,ASTN1,TEK,LGALS1,MAPK7,NLGN4X,MYCN,FNDC3A,ABL1,DPP4,STXBP1,CTNNB1,CTNNA1,CTNNA3,CTNNA2,MYADM,CCL21,NCAM2,PXN,BMP7,TNXB,CLIC1,ROCK1,ANK3,LAMB1,THBS4,JUP,COL14A1,ALOX12,AXL,CERCAM,PTK2,RGCC,EPCAM,NPHP1,CDH1,CDH3,COL13A1,SLIT2,NEGR1,PDPN,PIK3CB,EPB41L5,MGP,CNTN4,GLDN,RAB1A,TRIOBP,MSN,…	ZAP70,PARVA,NET1,PIEZO1,ZFP36L1,FN1,PLEKHA7,ANTXR1,TNIP1,ITGB1BP1,BMPR1B,PTPRU,ARHGEF7,NRCAM,PIP5K1C,TSPAN32,HBB,CYR61,TBX18,NINJ2,PTPN6,BVES,PTPRC,ILK,LMO7,CXCL12,CIB1,VAMP3,TTYH1,OLR1,PRKG1,GTPBP4,EPHB3,CELSR2,EPHA1,EPHA7,KLF4,PEAK1,CYFIP2,PRKCA,PRKCD,PRKCQ,CD209,FBLIM1,CHAD,MERTK,CDC42,DLG5,DLG1,JAM2,JAM3,JAK2,AP1AR,COL11A1,MICALL2,TENM2,WNT5A,SOX9,FOXF1,VNN1,GAS6,PKP2,PKP3,PKP4,MMP24,TGFB1,TG…	-0.469212	0.000247048	0.0088024
response to nutrient(GO:0007584)	165	220	26	16423	0.16	139	41832	0.33	NR1H4,C2,FKBP1B,BCHE,ABCG8,ABCG5,SLC6A4,USF1,ARG1,ADIPOR2,KYNU,CDKN2B,CDKN2D,RRP8,RPS6KB1,ALDH3A1,BMP7,SLC27A4,SERPINC1,PPARD,PPARG,IL15,BCKDHB,NCOA1,CASR,CHMP1A	TBXA2R,NR1H4,SLC16A1,MDM2,BDNF,MED1,ENSA,GSN,BDH1,F7,ACSL1,C2,ACSL4,ACSL3,ACSL6,CXCL10,ABCA1,CYBB,FKBP1B,CYP27B1,SOD2,TSPO,BCHE,SNW1,MTOR,IGFBP2,HMGCS1,HMOX1,PITX2,ABCG8,ABCG5,SLC6A4,GATM,SPP1,USF1,USF2,GAS6,TGFB1,ASCL1,CAT,PKLR,SNAI2,TNC,ERCC1,TGFBR2,CCND1,AQP3,SRF,SMS,MTHFR,LIPG,LIPE,ARG1,ADIPOQ,ARSB,ARSA,ITGB1,ITGA2,ADIPOR2,SSR1,FADS1,AACS,SSR2,COL1A1,ASS1,VDR,KYNU,AKR1C3,VCAM1,STAR,STC2,STC1,…	-0.741399	0.000247534	0.0088024
anion transmembrane transport(GO:0098656)	165	541	26	16423	0.16	139	41832	0.33	SLC25A15,SLC5A6,AQP1,SLC1A4,CLCN2,SLC27A5,SLC38A7,CLIC1,CLIC5,ANO4,ANO6,CPT2,SLC22A4,GABRR2,GABRB2,GABRA6,GABRG3,PCYOX1,SLC12A4,SLC12A5,SLC12A6,LAT2,SLC20A2,GLRB,SLC7A6,BEST3	CFTR,SLC16A3,SLC16A7,SLC25A20,SLC16A1,SLC25A26,SLC25A10,SLC25A15,SLC25A17,SLC25A42,ADAMTS8,SLC26A10,SLC26A11,SLC4A2,ACSL6,TTYH3,TTYH2,TTYH1,SLC22A16,SLC5A6,CPT1B,CPT1A,SLC6A14,SLC6A15,MCAT,SLC17A7,SLC6A9,SLC17A3,SLC17A4,SLC6A8,SLC17A1,SLC17A2,SLC7A10,SLC7A14,SLC7A11,CLCA2,CLCA1,CLCA4,CLCC1,GLRA3,AQP1,SLC1A4,SLC1A5,CLCN1,CLCN3,CLCN2,CLCN7,CLCN4,CLCN5,ANO10,EMB,SLC26A1,SLC26A2,SLC26A3,SLC26A6,SLC26…	-0.741399	0.000247534	0.0088024
negative regulation of cellular component organization(GO:0051129)	525	1164	111	16338	0.67	414	41557	0.99	HIGD1A,POT1,AP2M1,HDAC2,ANAPC1,ANAPC4,SPTBN1,ITGB1BP1,SNCA,ADCY6,TBX20,PARL,SPTAN1,VDAC2,AR,LRRTM2,LRRTM1,STMN1,TTC3,TRIAP1,TOM1L2,PICK1,PRKD1,XRCC3,SAR1A,CDC23,TBX5,CLASP1,SETMAR,MSH2,MID1,IL15RA,SPTB,WAPL,FOXA1,CFLAR,KCTD7,TNR,ERCC4,TRPV4,TBC1D4,TBC1D7,APOA2,TAF7,HEY2,DCC,RAPGEF2,LGALS1,SET,CLU,CKAP2,ARHGAP6,TM9SF1,IER3,FKBP4,RNF6,PPFIA1,CLTC,FAP,SPG20,DPP4,TERF2,WASF2,EVL,SPOCK1,LYPLAL1,IGF1,P…	HIGD1A,ACAA2,GFAP,ARHGEF15,POT1,ATG5,ATG7,NET1,ARHGDIA,AP2M1,HDAC2,HDAC6,MAPRE1,ANAPC1,ANAPC2,ANAPC5,ANAPC4,ANAPC7,NR1H2,NR1H3,FXN,JARID2,LYPLA1,SPTBN5,SPTBN4,TET1,PPIF,SPTBN2,SPTBN1,CBFA2T2,EML4,EML2,ITGB1BP1,PBLD,GFI1,PARK7,ATXN2,PECAM1,OPA1,PTPRG,PTPRO,SDHAF2,HGF,NUBP1,ARHGEF2,ARHGEF1,CAPZA2,CAPZA1,TWF1,TWF2,VAT1,PPM1A,SNCA,ADCY6,ADD2,ADD1,TBX20,PARL,NR2F1,NEUROD2,NFE2,MUL1,GSN,BUB1B,SPTAN1,PC…	-0.382763	0.000251224	0.00884799
skeletal system development(GO:0001501)	407	785	82	16367	0.5	325	41646	0.77	SGPL1,AEBP1,SULF2,SULF1,BMPR1B,ADAMTS7,ADAMTS4,ACP5,RSPO2,CYR61,COL12A1,CHRD,CHD7,HHIP,TBX3,MMP16,TGFB3,TGFB2,BMPR2,BBX,DCHS1,EXTL1,TEK,EFEMP1,HOXA1,HOXA2,HOXA5,HOXA7,HOXA9,SP3,MYCN,TFAP2A,GDF2,WDR48,COL1A2,LOXL2,POSTN,EN1,CSRNP1,ENG,ACVR2A,ACVR2B,EIF2AK3,PRPSAP2,IGF1,HIF1A,COL3A1,MMP9,COMP,CTNNB1,KIAA1217,IFT172,HOXA10,SMAD9,SMAD5,SMAD1,BMP7,BMP5,FGF9,RAI1,COL5A2,GDF10,MBTD1,MKKS,RASSF2,ANO6,HAN…	HDAC4,FRZB,FST,WWOX,SGPL1,MDFI,PPIB,PLEKHA1,AEBP1,TIPARP,CSGALNACT1,SULF2,SULF1,BMPR1B,BMPR1A,ADAMTS7,ADAMTS4,ACP5,ACP2,RSPO2,CYR61,TBX15,PHOSPHO1,DSCAML1,AXIN2,AXIN1,MEN1,CYP26B1,PTPRC,MCPH1,SH3PXD2B,HYAL1,HYAL2,HYAL3,PKDCC,WNT9A,PRKRA,FREM1,COL12A1,EPHA2,WFIKKN1,PLXNB1,CHRD,PRKCA,IGFBP4,IMPAD1,JAG2,CHAD,DLL3,AMER1,NIPBL,DLG1,BBS2,IRX5,MSX2,CHD7,FAM20C,PITX2,HHIP,COL11A2,COL11A1,TBX3,TBX4,TBX1,W…	-0.443168	0.00025155	0.00884799
regulation of growth(GO:0040008)	570	1235	122	16327	0.74	448	41523	1.07	BRMS1L,HDAC3,HDAC2,SGPL1,FTO,AFG3L2,FBLN5,SLC25A25,CAMK2D,PTPRJ,MAPT,WWC1,WWC2,TBX20,CYR61,SOCS5,AGTR1,ILK,AR,IL7,BDKRB1,MBD5,GHRHR,PRKCQ,IGFBP1,MSTN,LATS2,NDUFA13,TCHP,BBS4,CHD7,ENPP1,TBX5,SLC6A4,LRP12,ATP8A2,TGFB2,DCUN1D3,BMPR2,TNR,TRPV2,BMP10,HEY2,ESR2,DCC,ADAM17,SFN,CAPRIN2,PNPT1,PLAC8,RMI1,GDF2,RNF6,ADIPOR2,DCSTAMP,SPG20,SERTAD2,NAIF1,PTK2B,EAF2,LGMN,ACVR1C,SPOCK1,IGF1,CDKN2A,CDKN2D,HIF1A,CD…	BARHL2,PARP1,GHR,ARHGEF11,BRMS1L,ATRN,NET1,HDAC3,HDAC2,FRZB,ANAPC2,SGPL1,FTO,AFG3L2,SASH3,FXN,FBLN5,SLC25A25,FN1,SPTBN4,PPIB,CAMK2D,ATXN2,PTPRJ,PPT1,HLX,MAPT,NRCAM,TWF2,WWC1,WWC2,WWC3,PPM1F,BDNF,TAF9B,TBX20,N6AMT1,CYR61,CCDC85B,WFS1,DSCAM,SOCS2,SOCS6,SOCS4,SOCS5,WT1,MUL1,WRN,MEN1,PAK2,ENO1,AGTR1,ILK,CD320,F2,HYAL1,HYAL2,AR,ACSL4,IL7,CXCL12,CIB1,CXCL16,CYBA,BDKRB1,GHSR,MBD5,CYP27B1,BCL6,SOD1,APBB2…	-0.367345	0.00025531	0.0089317
ATP metabolic process(GO:0046034)	529	1290	112	16337	0.68	417	41554	0.99	ATP6,ATF7IP,ATP5A1,SLC25A25,SLC25A13,MDN1,ATP5J2,ATP5G2,ATP5G3,SNCA,ABCA3,ABCB1,ABCB4,PICK1,XRCC3,XRCC2,ENPP1,ABCG8,ABCG5,ABCF1,ABCF3,ABCE1,ABCD4,ABCC3,ABCC4,ABCC1,ABCC2,ABCC5,ABCC6,PSMC6,MSH6,MSH3,MSH2,MSH5,MSH4,VPS4A,SKIV2L,MYO10,DMC1,DDX17,DDX18,DDX10,GBAS,PLS1,OLA1,ATP6V1G2,ATP6V1G1,PMS1,SWSAP1,GTF2H4,DDX23,DDX25,DDX24,DDX47,DDX49,DDX56,DDX51,POLQ,ATP13A1,ATAD2,TPM1,COX10,ATP5O,DDX39B,HSP90AA…	ATP6,DHX8,DHX9,ATF7IP,CFTR,ATRX,SNRNP200,ABCB10,ABCB11,ATP5C1,FXN,ATP5A1,SLC25A25,SLC25A23,PPIF,SLC25A13,MDN1,RALBP1,PARK7,SDHAF2,WRNIP1,ACLY,LONRF3,LONRF1,LONRF2,ATP5J2,ATP5G2,KIF9,ATP5G3,KIF7,KIF6,ATP5F1,SNCA,BDNF,ABCC11,ABCC10,YTHDC2,WRN,NDUFB10,TTF2,IDE,NDUFAB1,ABCA8,ABCA7,ABCA9,ABCA2,ABCA1,ABCA3,ABCA6,ABCA5,ABCB9,ABCB8,ABCB1,ABCB7,ABCB6,ABCB4,NDUFAF1,PICK1,UQCRC1,XRCC3,XRCC2,ADCYAP1,NDUFA10,…	-0.381026	0.000263572	0.00907361
microtubule cytoskeleton organization(GO:0000226)	373	951	74	16375	0.45	299	41672	0.71	HDAC3,NEK6,EML1,TUBGCP4,ATXN3,MAP2,RANBP10,MAPT,SNCA,LZTS2,STMN4,STMN1,HAUS6,XRCC3,XRCC2,BBS4,CLASP1,MID1,TRDN,TRPV4,CKAP2,SON,ATAT1,IFT88,FKBP4,DST,MAP1A,TPPP3,ASUN,PPP1R12A,CDKN1B,SENP6,MAP7D3,CEP68,CTNNB1,IFT172,CAPZB,MAP6D1,CENPJ,TUBE1,SPRY2,AURKA,RAN,NCOR1,KIF20A,SLAIN2,TUBA1B,ROCK2,CHEK1,MLH1,RGS2,BICD1,PTK2,CRIPT,BLOC1S2,BRCA2,AK7,TRIM54,APC,DICER1,CDK5RAP2,DYNC1LI2,FOPNL,AUNIP,TTLL5,ULK4,…	PARP3,ARHGEF10,HDAC3,HDAC6,PAX6,MAPRE1,NEK6,NEK7,PARD3,SLC16A1,SSX2IP,ZW10,EML4,EML2,EML1,TUBGCP4,TUBGCP3,TUBGCP6,NEFH,NEFM,TUBGCP2,ATXN3,ATXN7,MAP2,MAP4,MAP7,MAP6,MAP9,RANBP10,NUBP1,MAPT,ARHGEF2,SASS6,SMC3,SNCA,AXIN1,SPICE1,HEPACAM2,MCPH1,LZTS2,LMNA,PRC1,CIB1,STMN2,STMN4,STMN1,SPECC1L,HAUS7,HAUS8,HAUS4,HAUS3,HAUS6,HAUS5,HAUS1,RSPH1,RSPH9,EPHA3,CHP1,HTT,UBE2B,PRKCZ,XRCC3,XRCC2,BUB3,WEE1,BBS4,NTMT…	-0.462305	0.000263056	0.00907361
positive regulation of cell migration(GO:0030335)	284	644	53	16396	0.32	231	41740	0.55	ITGB1BP1,CAMK2D,PTPRJ,CYR61,ILK,BDKRB1,TF,PRKCE,PRKD1,SYNE2,JAK2,ELP3,TGFB2,BMPR2,TEK,AQP1,RAPGEF2,ADAM17,ARHGAP5,TFAP2A,DIAPH1,PTK2B,IGF1,AMOT,HIF1A,PDGFB,MMP9,MYADM,CCL20,CCL21,CCL19,RPS6KB1,ETS1,TNFAIP6,HSPA5,LAMB1,THBS4,AIF1,ALOX12,PTK2,APC,SPAG9,FLT1,DAPK3,PDPN,EPB41L5,ANGPT1,ZNF268,INSR,PDE4D,DAB2IP,GCNT2,SUN2	AMOTL1,ARHGEF39,FADD,HDAC9,HDAC7,HDAC6,PAX6,FAM110C,SASH1,ITGB1BP1,CAMK1D,CAMK2D,PECAM1,PTPRJ,HGF,ARHGEF7,ANGPTL3,XCL1,PPM1F,CYR61,MIEN1,SCARB1,PLVAP,PTPRC,PLET1,ILK,F7,F3,HYAL1,PTP4A1,CXCL12,CXCL10,CIB1,CXCL16,BDKRB1,EPHA1,PLA2G7,TF,PRKCA,PRKCE,PRKD1,PRKD2,SYNE2,IRS1,SEBOX,RRAS2,CREB3,JAK2,ADORA3,MCAM,EDNRA,TIRAP,WNT5A,SOX9,ELP3,ELP6,ELP5,WNT11,ATP8A1,FOXF1,GAS6,MMP14,TGFB1,TGFB2,BMPR2,MYO1C,MYO…	-0.537703	0.000261295	0.00907361
angiogenesis(GO:0001525)	397	856	80	16369	0.49	317	41654	0.76	ITGB1BP1,HS6ST1,SULF1,DDAH1,TSPAN12,TBX20,CYR61,EPHB3,KLF5,TF,PLXND1,PRKD1,EREG,TGFB2,WARS,SEMA3E,BMPER,TEK,AQP1,HOXA3,HOXA5,HOXA7,MAPK7,GDF2,PTK2B,LOXL2,ACVR1,ENG,PLCD1,AMOT,HIF1A,THSD7A,ARHGAP22,PGF,CTNNB1,CHRNA7,GTF2I,FASLG,FGF9,NFATC4,NFATC3,ETS1,GATA6,ROBO1,GATA4,ROCK1,ROCK2,RTN4,TNFAIP2,PDCD10,NOTCH4,THBS4,JMJD6,ECSCR,HPSE,HAND1,HAND2,MAP3K7,ALOX12,PTK2,APOLD1,RGCC,CXCR4,SP100,EPAS1,DICER1,…	PARVA,NR2E1,HDAC5,TBXA2R,ADM2,HDAC9,HDAC7,SASH1,MEOX2,EMP2,FN1,ITGB1BP1,HS6ST1,SULF1,DDAH1,PTPRM,HGF,NRCAM,ANGPTL6,ANGPTL3,ANGPTL4,VAV3,VAV2,TSPAN12,ADD1,TBX20,CYR61,MED1,PTPRB,GPI,F3,HYAL1,C3,C6,C5,C1GALT1,CXCL12,CXCL10,CIB1,PRCP,NR4A1,CXCL17,ID1,EPHB3,EPHB4,EPHB1,EPHB2,KLF5,EPHA1,EPHA2,KLF4,TF,MTDH,PLXND1,PRKCA,PRKCB,PRKD1,PRKD2,HRG,POFUT1,ATPIF1,JAG1,HHEX,DLL4,CDC42,HMOX1,JAM3,PITX2,MCAM,EDNRA…	-0.442867	0.000266839	0.00913746
endocytosis(GO:0006897)	546	1341	116	16333	0.71	430	41541	1.02	LRRK2,AP2M1,RABEPK,STEAP2,FYN,SNCA,FCER1G,ITPR2,SCARA3,SCARA5,LRRTM2,LRRTM1,C2,CD302,MAPKAPK2,PLA2G6,RIN3,PICK1,CYFIP2,PRKCE,PRKD1,YES1,PLA2R1,MSR1,MERTK,ENPP1,ENPP2,ENPP3,MICALL1,LRP1B,LRP12,DNM1L,C4A,SCYL2,ELMO3,ELMO2,ELMO1,MARCO,MYO1G,MYO10,WASL,APOB,GRIA1,TUB,KCTD7,DNM3,DNM1,DNM2,DNER,GAPVD1,ACTR3,ACTR2,MYO6,RAMP3,CRK,ARF1,ABL1,EPN2,LY75,ILDR1,CLTC,HTR1B,NME1,REPS1,AAK1,ZFYVE16,LOXL4,LOXL2,SC…	BTBD9,AP2S1,GHR,LRRK2,AP2M1,GAK,RABEPK,NR1H2,NR1H3,SBSPON,RABEP2,RABEP1,STEAP2,AP2A2,AP2A1,FYN,CAMK1D,ATXN2,PPT1,ACHE,VAV3,VAV2,VAV1,PIP5K1C,PIP5K1A,RSPO1,ESYT2,HCK,SNCA,ADD1,FCER1G,HIP1R,ITPR3,ITPR1,ITPR2,SCARB1,SCARA3,PTPN1,SCARA5,PAK1,SCARF1,SORT1,C3,LRRTM2,LRRTM1,C2,PRSS12,CD302,VAMP8,VAMP7,ABCA7,MAPKAPK3,ABCA1,MAPKAPK2,CXCL16,OLR1,HIP1,RINL,PRG4,FKBP15,RIN1,PLA2G6,RIN3,PICK1,SNX9,SNX5,SNX2,F…	-0.376702	0.000271339	0.00923399
nuclear transport(GO:0051169)	504	1061	106	16343	0.64	398	41573	0.95	NXF1,SPTBN1,TONSL,ATXN1,NUTF2,RPL23,IPO5,PPM1B,KPNA5,KPNA3,KPNA1,LZTS2,TMCO6,CPSF3,CPSF2,JAK2,RBM22,NFKBIA,TGFB3,TGFB2,RPSA,TEK,INPP4B,AKAP13,SFN,SET,SRI,MAPK7,SRSF2,SRSF7,SRSF9,IER3,ABRA,DDX25,U2AF2,UHMK1,PPP1R12A,IGF1,CDKN2A,CCHCR1,NOP58,NSRP1,UPF3B,CCL19,SMAD4,BMP7,TOB1,DDX39B,RAE1,FGF9,UPF1,RALA,RAN,PHIP,FYTTD1,AKAP6,PHAX,ERBB4,PDIA3,PPP1R10,HSPA9,ANKRD54,DHX38,RAB27A,JUP,THOC7,THOC1,TRIM28,G…	NXF1,PARP1,ANP32A,ANP32B,SARNP,SLBP,FAF1,MDFI,NEMF,FYB,SEC61B,SPTBN1,NLRP3,MDM2,PBLD,TONSL,PARK7,ATXN1,RSRC1,BMPR1A,RANBP17,NUTF2,SMN1,RPL23,MAVS,SMG6,SMG7,SMG1,IPO9,IPO7,IPO5,PPM1A,PPM1B,MBTPS1,ADAR,ENY2,MED1,NEUROD1,ARNTL,AXIN2,AXIN1,WRN,KPNB1,KPNA6,KPNA5,KPNA4,KPNA3,KPNA2,KPNA1,LZTS2,TMCO6,HYAL2,PPP3CA,STRADA,LMNA,STRADB,PABPN1,RAB40C,RAB40B,RIT1,BCL3,BCL6,CHP2,CHP1,ZC3H3,AGFG1,HTT,MTOR,FBXW11…	-0.389362	0.000275409	0.00923399
energy derivation by oxidation of organic compounds(GO:0015980)	364	885	72	16377	0.44	292	41679	0.7	ATP6,EPM2AIP1,ADRA1B,ACADM,UGP2,GCK,MDH1,GFPT1,ATP5A1,SLC25A25,SLC25A14,SLC25A13,ATP5J2,FASTKD3,ADCY3,ADCY4,ADCY1,ADCY2,SNCA,ADCY6,ITPR2,ACSM1,CYCS,AGPAT1,NDUFA13,NDUFA12,ENPP1,PPP1CB,KCNS3,SNAP25,GBE1,DLST,COX6A1,CALM1,PNPT1,PCDH12,POMC,IGF1,SDHC,STXBP1,COX10,ATP5O,GNG3,NFATC4,NFATC3,AKAP5,COX1,NDUFS2,NDUFS1,TBRG4,CPS1,NDUFB3,NDUFB4,NDUFB6,NDUFB8,NDUFB1,NDUFB2,NDUFA5,NDUFA2,NDUFA8,GSK3B,RPS27A,K…	ATP6,PPP1CA,PASK,EPM2AIP1,ADRA1B,ACADM,GAA,UGP2,GCK,IL6ST,ATP5C1,MDH2,MDH1,FXN,NR1D1,GFPT1,GFPT2,ATP5A1,SLC25A25,SLC25A23,SLC25A12,SLC25A14,SLC25A13,PARK7,SDHAF2,ACO2,GNG13,GNG11,GNG12,ACLY,GNG10,ATP5J2,ACADVL,ATP5F1,GYG2,GYG1,FASTKD3,ADCY3,ADCY4,FASTKD1,ADCY1,FASTKD2,ADCY2,ADCY7,ADCY8,ADCY5,SNCA,ADCY6,BDNF,FASTKD5,GYS1,GYS2,ITPR3,ITPR1,ITPR2,ADCY9,FH,NDUFB10,CS,ACSM1,NDUFAB1,CYC1,NDUFAF1,NDUFAF2…	-0.465968	0.000278218	0.00923399
phospholipid metabolic process(GO:0006644)	318	874	61	16388	0.37	257	41714	0.61	PIP5KL1,SNCA,AGPAT1,PLA2G6,HADHA,HADHB,LCLAT1,ENPP2,PLEK,PLBD1,PLS1,APOA2,INPP4B,DBI,GPCPD1,SERINC5,SERINC1,ARF1,ARF3,FAM135A,DPM2,ASPG,LPIN1,INPP1,PLCD1,MTMR6,GPAT3,PDGFB,CHPT1,SMPDL3A,PRDX6,PI4K2A,PIGK,PIGL,PIGF,PIGC,PIGV,PIGP,LDLR,PPARD,MBOAT2,GATA6,SMPD3,CRLS1,ATM,PIK3C2G,LCAT,PIP4K2A,PEMT,SLC44A1,SLC44A2,SLC44A4,SLC44A5,CDS2,PIK3CB,PLA2G16,PLA2G15,MVK,DGAT2,PIK3R4,DHDDS	PIP5KL1,ISYNA1,ACP6,SPHK2,ACHE,ANGPTL3,SMG1,PIP5K1B,PIP5K1C,PIP5K1A,SNCA,PHOSPHO1,SCARB1,SGMS2,SGMS1,PGAP3,PGAP2,PGAP1,MTMR14,ACSL3,ACSL6,MPPE1,CHKA,CHKB,AGPAT5,AGPAT4,AGPAT3,AGPAT1,PLA2G6,PLA2G5,SRD5A3,PRKCD,MTM1,HADHA,HADHB,SYNJ1,SYNJ2,IMPAD1,LCLAT1,ENPP2,DOLPP1,PLSCR1,PLD3,PLD2,PLD1,PLD4,PLAA,IDI1,PLEK,CSF1R,PLBD1,ETNK1,ETNK2,STOML2,PLS1,PLAUR,NAPEPLD,APOA4,APOA2,BPNT1,TAZ,FDPS,HEXB,PCYT2,INPP…	-0.503915	0.000273872	0.00923399
regulation of protein processing(GO:0070613)	209	503	36	16413	0.22	173	41798	0.41	LRRK2,HDAC2,SUMO1,SOCS5,C2,CYFIP2,BBS7,CYTB,C4A,CSNK1E,FBXW7,PLAT,ATRAID,CFH,CFB,CLU,TNFRSF1B,IFT88,PLGRKT,UBXN1,OPHN1,RPS6KA2,RFWD2,SERPINA5,C4BPB,C4BPA,AURKA,BAG5,BAG6,GSK3B,IL10,NRDC,CD55,TRIB2,CASP8,DAB2IP	FADD,LRRK2,HDAC2,HDAC6,NELL1,PIAS1,NR1H2,XBP1,MDM2,PARK7,SUMO2,SUMO1,WFS1,SOCS4,SOCS5,AXIN1,PTPN3,F2,C7,C9,C3,C6,C5,C2,IDE,SNX9,CYFIP2,LDLRAD3,HPN,KCNE2,FBXW11,BBS7,SEBOX,OSBPL7,CYTB,PSMF1,AURKAIP1,C4A,KLKB1,C8A,C8B,CSNK1D,CSNK1E,USP44,FBXW7,APOE,FBXO5,PLAT,TBC1D10A,MASP1,BCL2L12,NKD2,TAF9,TAF1,PLK3,PLK2,PLK1,INPP5B,ATRAID,CFP,CFH,CFI,CFB,USP5,CLEC3B,IFT52,CLU,GIPC1,TNFRSF1B,WAC,IFT88,PROS1,CLN3,…	-0.634998	0.000277188	0.00923399
regulation of protein maturation(GO:1903317)	209	503	36	16413	0.22	173	41798	0.41	LRRK2,HDAC2,SUMO1,SOCS5,C2,CYFIP2,BBS7,CYTB,C4A,CSNK1E,FBXW7,PLAT,ATRAID,CFH,CFB,CLU,TNFRSF1B,IFT88,PLGRKT,UBXN1,OPHN1,RPS6KA2,RFWD2,SERPINA5,C4BPB,C4BPA,AURKA,BAG5,BAG6,GSK3B,IL10,NRDC,CD55,TRIB2,CASP8,DAB2IP	FADD,LRRK2,HDAC2,HDAC6,NELL1,PIAS1,NR1H2,XBP1,MDM2,PARK7,SUMO2,SUMO1,WFS1,SOCS4,SOCS5,AXIN1,PTPN3,F2,C7,C9,C3,C6,C5,C2,IDE,SNX9,CYFIP2,LDLRAD3,HPN,KCNE2,FBXW11,BBS7,SEBOX,OSBPL7,CYTB,PSMF1,AURKAIP1,C4A,KLKB1,C8A,C8B,CSNK1D,CSNK1E,USP44,FBXW7,APOE,FBXO5,PLAT,TBC1D10A,MASP1,BCL2L12,NKD2,TAF9,TAF1,PLK3,PLK2,PLK1,INPP5B,ATRAID,CFP,CFH,CFI,CFB,USP5,CLEC3B,IFT52,CLU,GIPC1,TNFRSF1B,WAC,IFT88,PROS1,CLN3,…	-0.634998	0.000277188	0.00923399
monosaccharide biosynthetic process(GO:0046364)	87	207	10	16439	0.06	77	41894	0.18	ACADM,GCK,MDH1,SLC25A13,FOXO1,PMM2,GPD2,GOT2,PCK2,PCK1	ATF3,ACADM,GCK,MDH2,MDH1,NR1D1,SLC25A12,SLC25A11,SLC25A13,SLC25A10,NR3C1,PTPN2,ENO2,ENO3,ENO1,GPI,PGAM1,PGAM2,CRTC2,PC,G6PC,G6PD,SORD,PFKFB1,WDR5,SOGA1,TKT,CHST15,FOXO1,FAM132A,CMC2,CMC1,PMM2,PMM1,ADIPOQ,CLK2,FBP1,FBP2,STK11,TPI1,GAPDHS,OGT,G6PC3,ALDOA,RBP4,ALDOC,ALDOB,PGD,LEPR,PPARA,RANBP2,GPD2,GPD1,RGN,GOT2,GOT1,PGM1,TALDO1,SLC25A1,PGK1,TCF7L2,KAT2A,KAT2B,SIK1,PER2,SESN2,CRY1,PDK2,SLC35B4,PPARG…	-1.10573	0.000287943	0.009508
positive regulation of leukocyte activation(GO:0002696)	240	611	43	16406	0.26	197	41774	0.47	BCL10,FYN,FCER1G,SOCS5,IL7,PRKCQ,YES1,PDCD1LG2,ZBTB1,AP1G1,CD276,CD274,VNN1,IL15RA,ADORA2B,IL2RA,TESPA1,LGALS1,DPP4,IGF1,PELI1,GPR183,CCL21,CCL19,MAPKAP1,PPP2R3C,MYD88,HSPH1,HLA-DRB3,HLA-DRB4,HLA-DRB5,HPS1,AIF1,MAP3K7,HLA-DRA,ZNF335,AXL,IL15,HLA-A,CD40,CD55,GLI2,GLI3	SART1,ZAP70,TICAM1,BCL10,FADD,IL6ST,SASH3,PDPK1,FYN,TNIP2,HLX,VAV3,VAV1,XCL1,FCER1G,FCER1A,TBX21,AP3B1,AP3D1,ITPKB,SOCS5,PTPN6,PAK2,PAK1,PTPRC,IL12A,IL7,TNFSF9,BCL6,MTOR,PRKCQ,PRKCZ,YES1,IGFBP2,PDCD1LG2,CD226,TCF3,ZBTB1,AP1G1,CDC42,ADORA3,TIRAP,WNT5A,CD276,MALT1,CD274,CD247,MEF2C,BTK,VNN1,GAS6,TGFB1,IL15RA,MLST8,ADORA2B,IL12RB1,ICOS,CD2,CD4,CD5,MAP3K14,BLM,IL2RA,TESPA1,SYK,IL23A,TGFBR2,NKAP,WHSC1…	-0.587377	0.000302708	0.00994479
cofactor metabolic process(GO:0051186)	312	747	60	16389	0.36	252	41719	0.6	GCK,MDH1,DHFR,STEAP4,BLVRA,SLC25A32,PPOX,ACOT12,SNCA,NIF3L1,TDO2,BDH2,MTRR,SLC5A6,ELOVL4,ELOVL2,MCEE,MCM9,MCM6,VNN1,VNN2,GART,SPTB,HIBADH,DLST,SHMT1,FPGS,VKORC1L1,HNF1A,MTHFD1,KYNU,AASS,COX10,CRYZL1,TP53I3,COQ5,COQ4,COQ3,COQ2,IREB2,RPE,GPHN,HSD17B4,ANK1,GLYR1,CRYM,CROT,PDP2,OGDH,TMEM14C,PDXP,ME1,ACSM2A,MVK,DGAT2,PCK2,RFC2,CBR3,CBR1,PCCA	ATIC,ADH4,GCK,PPCS,MDH2,MDH1,DHFR,STEAP4,FXN,BLVRA,BLVRB,SLC25A32,SLC25A39,PPOX,ACOT12,PPT1,ASPDH,FTCD,ACLY,TECR,SNCA,NUDT12,NIF3L1,NFS1,UBIAD1,TDO2,RSAD1,BDH2,PGAM1,AASDHPPT,MTRR,ACSL1,ACSL4,ACSL6,ACSL5,ABCB6,PC,FOLH1,COASY,G6PD,TSPO,ACSS2,ACSS1,FOLR1,HPX,SLC5A6,NMRK1,NMRK2,ATPIF1,DLAT,ELOVL1,ELOVL5,ELOVL4,ELOVL2,ELOVL7,ELOVL6,NMNAT3,NMNAT2,NMNAT1,CYB5R4,HMOX2,HMOX1,MCEE,QDPR,MCM9,MCM8,MCM7,MCM3…	-0.500738	0.00031064	0.0101538
protein oligomerization(GO:0051259)	408	842	83	16366	0.5	325	41646	0.77	BCL10,ATL2,ATL3,ACADS,ACADL,ACAT1,GFPT1,CAMK2D,LNX2,SCARA5,ILK,CRTC1,AR,PRF1,PRNP,ZBTB1,KCND2,CPSF6,SLC6A4,SCUBE3,KCNRG,KCNS3,DNM1L,AHNAK,BID,THG1L,KCTD3,KCTD7,KCTD8,TRMT61B,SHMT1,TEK,TOR2A,PKD2L1,PNPT1,CLU,TM9SF1,CTH,ARG1,TAF10,TP73,TMED10,COL1A2,AASS,EVL,EIF2AK3,DPYS,PRKCSH,CTNNB1,CTNNA1,NOD1,HSF4,RRM2,TRADD,CHRNB3,TYSND1,COLEC12,RBMX,SYT1,GOPC,JUP,RIPK1,TRIM28,EHD3,GJA1,VWA2,SPAG9,CDH1,RIPK3,M…	ADSL,NLRC4,BCL10,FADD,ATL2,ATL1,ATL3,ACADS,ACADL,ACAT1,PPAT,GFPT1,SPTBN5,NLRP3,CAMK2G,CAMK2D,LNX2,LNX1,DCTPP1,ACHE,ANGPTL4,VASP,HBB,GCHFR,SAMHD1,HPRT1,ITPR3,AXIN1,GLS,SCARA5,SH3GLB1,NUDT21,GPT,ILK,CRTC3,CRTC2,CRTC1,SEPT11,KCNAB2,AR,DECR1,IDE,UXS1,PRF1,BIRC3,SOD2,CHP1,SNX9,SNX2,SORL1,IRAK1,PRNP,PRKCZ,ATPIF1,KCNJ2,PPP2CA,CPT1A,ZBTB1,KCNC2,KCNC1,KCNC4,KCNC3,KCND3,KCND2,KCND1,KCNA2,KCNA1,KCNA6,KCNA5,…	-0.430985	0.00032154	0.0104573
monosaccharide metabolic process(GO:0005996)	303	706	58	16391	0.35	245	41726	0.58	EPM2AIP1,ADRA1B,ACADM,UGP2,GCK,MDH1,STEAP4,GFPT1,SLC25A13,HK1,FUT9,FUT8,FUOM,PRKCE,ENPP1,PFKFB3,PFKFB2,PPP1CB,USF1,HIBADH,GBE1,FOXO1,HKDC1,CALM1,GALM,GALT,PMM2,XYLB,POMC,DUSP12,IGF1,OTOGL,GSTO1,PPARD,GPD2,RPE,RBKS,GOT2,GSK3B,RPS27A,KHK,GLYR1,SLC23A1,SLC23A2,YLPM1,UGT2B17,NCOA2,CRYM,PHKG1,PMAIP1,UGT2A3,UGT2B4,UGT2B7,PCK2,PCK1,INSR,DYRK2,C1QTNF2	PPP1CA,PASK,EPM2AIP1,ATF3,ADRA1B,ACADM,PGM2L1,GAA,UGP2,GCK,DHDH,MDH2,MDH1,STEAP4,NR1D1,GFPT1,SLC25A12,SLC25A11,SLC25A13,SLC25A10,HK2,HK1,HK3,NR3C1,GYG2,GYG1,GYS1,GYS2,PTPN2,ENO2,ENO3,ENO1,GPI,PGAM1,PGAM2,CRTC2,PC,GDPGP1,G6PC,G6PD,FUT9,FUT8,FUT7,FUT6,FUT5,FUT4,FUT1,OMA1,FUOM,MTOR,PRKCE,POFUT2,POFUT1,IGFBP4,IGFBP5,DLAT,SORD,CPT1A,IRS1,CYB5R3,ENPP1,PFKFB4,PFKFB3,PFKFB2,PFKFB1,CYB5A,GALK2,GALK1,PPP1C…	-0.506423	0.000325547	0.0105347
exocytosis(GO:0006887)	337	839	66	16383	0.4	271	41700	0.65	LRRK2,RABEPK,STEAP3,STEAP2,PPIA,EXOC3L4,EXOC3L1,EXPH5,STXBP5L,SNCA,FCER1G,EXOC7,EXOC4,EXOC6,EXOC2,PLA2G6,TF,CADPS2,AP1G1,ABCC4,SNAP29,SNAP25,YKT6,TGFB3,TGFB2,ADORA2B,MYO1G,PLEK,TTN,KCTD7,SYTL2,CALM1,CLU,LLGL1,SRGN,SYT16,TMED10,SCFD1,IGF1,STXBP1,STXBP6,STXBP5,PDGFB,PI4K2A,SERPINA1,RALA,SCRN1,MICAL3,ANK1,TNFAIP2,HSPA5,SYT1,SYT9,RAB27A,LAT2,RAB15,RIMS2,RIMS1,RAB3B,RAB3C,RAB3D,GLRB,PCLO,STX7,CACNA1C,…	LRRK2,PPBP,RABEPK,STEAP3,PDPK1,STEAP2,FN1,PPIA,EXOC3L4,EXOC3L1,EXOC3L2,HGF,EXPH5,PIP5K1C,STXBP5L,HCK,SNCA,FCER1G,FCER1A,COPS5,PAK1,F8,F5,SNPH,EXOC7,EXOC8,PPP3CB,EXOC4,EXOC3,EXOC6,EXOC5,PRSS12,EXOC2,EXOC1,TXLNA,VAMP7,VAMP3,PLA2G6,TF,SOD1,CHP1,CADPS2,HRG,SYNJ1,AP1G1,HMOX1,PSAP,ADORA3,ABCC4,WDR1,RASGRP1,SLC17A9,FOXF1,VPS45,GAS6,SNAP29,SNAP25,YKT6,GRIK5,TGFB3,TGFB1,TGFB2,ADORA2B,MYO1G,MYO1F,CD9,VPS33…	-0.478207	0.000327752	0.0105533
regulation of neurogenesis(GO:0050767)	534	1009	114	16335	0.69	420	41551	1	LRRK2,HDAC2,ZFHX3,FYN,CFL2,CAMK2B,MAPT,ADCY6,PTPRZ1,PTPRD,ILK,LZTS1,TTC3,ID2,XK,EPHB3,FKBP1B,CHN1,FUOM,PRKCH,PRKD1,XRCC5,XRCC4,XRCC2,CHD7,EDNRB,TENM3,SLC6A4,ELL3,ATP8A2,SNAP25,IL15RA,BMPR2,FOXA1,TNR,TRPV2,TRPV4,HEY2,DCC,PDLIM5,RAPGEF2,LGALS1,ACTR3,CAPRIN2,HOXA2,RNF10,MYCN,TP73,TFAP2A,FKBP4,RNF6,SSH2,LIN28A,NME2,SPG20,PTK2B,STK24,NKX2-2,SPOCK1,PRKCSH,PACSIN1,HIF1A,COBL,TMEM30A,COL3A1,CTNNB1,CTNNA1…	BARHL2,SCN1B,GFAP,KNDC1,NR2E1,NET1,LRRK2,ATF1,ARHGDIA,ATF5,SARM1,HDAC2,PAX6,IL6ST,ANAPC2,ZFHX3,CPEB3,FYN,FN1,CBFA2T2,CFL2,CAMK1D,CAMK2B,GFI1,NEFM,BMPR1A,PTPRG,HMG20A,HMG20B,PTPRO,HGF,MAPT,ARHGEF2,ARHGEF1,NRCAM,TWF2,ACHE,ADCY6,BDNF,PALM,NR2F1,MED1,PTPRZ1,NEUROD2,NEUROD1,DSCAM,ARNTL,PAK3,SCARF1,PTPRD,ILK,F2,OPRM1,LZTS1,ACSL6,CXCL12,CIB1,BEND6,STMN2,TTC3,AVIL,KLK6,KLK8,ID2,XK,EPHB3,EPHB2,EPHA3,EPHA4…	-0.370445	0.000341858	0.010953
cellular response to peptide(GO:1901653)	328	743	64	16385	0.39	264	41707	0.63	FRS2,GCK,FYN,GFPT1,ADCY3,ADCY4,ADCY1,ADCY2,ADCY6,KLF5,MBD5,GHRHR,PRKCQ,IGFBP1,JAK2,ENPP1,USF1,ATP6V0D1,ATP6V0D2,FOXO1,RPS6,TBC1D4,MZB1,GAB1,ATP6V1C2,ADAM17,CAB39L,ATP6V1G2,ATP6V1G1,ATP6V1E1,ATP6V1E2,CRK,ARG1,DENND4C,SLC2A8,LPIN1,SREBF1,CTNNB1,GNG3,RPS6KB1,PXN,EIF4G1,FGF9,EEF2K,RAF1,PPARG,PHIP,ANKRD26,CPS1,PTK2,VWA2,KLF11,RHOQ,NCOA5,FGF20,EGR1,PIK3CB,MAX,RAB10,CASR,PRKAG1,PIK3R4,INSR,CRHR2	PARP1,GHR,FRS2,HDAC5,HDAC9,PAX6,GCK,PPAT,CPEB2,PDPK1,FYN,GFPT1,MDM2,AP3S1,ARHGEF2,FFAR3,GNG13,GNG11,GNG12,MAS1,GNG10,PPM1A,SH2B2,ADCY3,ADCY4,ADCY1,ADCY2,ADCY7,ADCY8,ADCY5,ADCY6,NFKB1,ADCY9,SOCS2,PTPN6,PTPN2,PTPN1,PAK1,PTPRE,PTPRA,ACSL6,STRADA,STRADB,IDE,MTUS1,KLF5,GHSR,KLF1,KLF4,KLF3,MBD5,GHRHR,MTOR,PRKCA,PRKCI,PRKCD,UBE2B,PRKCB,PRKCQ,NGFR,PRKCZ,PRKDC,PRLR,IGFBP1,SOS1,PRKAR2B,PRKAR2A,IRS1,PRKAR1B…	-0.482763	0.000345576	0.0110176
GO:0032320	307	855	59	16390	0.36	248	41723	0.59	RALGPS1,SPATA13,RAB3GAP1,RANBP10,ARHGEF4,ARHGEF6,SH3BGRL3,DOCK11,RIC1,DNMBP,RIN3,RABGAP1L,PLEKHG3,RASGRF2,RAB3IP,KCTD7,FOXJ1,SYDE2,ARAP3,TBC1D9,TBC1D4,TBC1D7,RAPGEF2,AKAP13,TBC1D15,LLGL1,TBC1D2B,ST5,ARHGAP6,ARHGAP5,DENND5B,DENND4C,PTK2B,DENND1A,DENND3,PREX2,OPHN1,ARHGAP15,CCL21,CCL19,DOCK9,GMIP,RABGAP1,FGD5,FGD4,ECT2L,FARP1,EZH2,GSK3B,RGL3,RGL1,CD40,RALGAPA2,RALGAPA1,ITSN2,ITSN1,RABGEF1,DAB2IP,RA…	ARHGEF40,RALGPS1,ARHGEF26,ARHGEF25,ARHGEF28,ARHGEF33,ARHGEF39,ARHGEF37,ERRFI1,ARHGEF18,ARHGEF19,ARHGEF16,ARHGEF17,ARHGEF15,ARHGEF12,ARHGEF10,ARHGEF11,KNDC1,NET1,SPATA13,USP6NL,RAB3GAP2,RAB3GAP1,RALBP1,RANBP10,ARHGEF4,ARHGEF3,ARHGEF2,ARHGEF1,ARHGEF7,ARHGEF6,ARHGEF5,ARHGEF9,VAV3,VAV2,VAV1,PIP5K1A,SH3BGRL3,DOCK10,DOCK11,MADD,RIC1,DNMBP,EPHA1,EPHA2,RIN3,RAP1GAP,PLXNB1,RABGAP1L,NGEF,DLC1,ADCYAP1,PLEKH…	-0.50151	0.000352709	0.0111899
cell morphogenesis involved in neuron differentiation(GO:0048667)	631	1440	138	16311	0.84	493	41478	1.17	CACNB1,CACNB2,CACNB3,CACNB4,LRRK2,AP2M1,PAX2,DCLK1,AFG3L2,NEO1,FYN,SPTBN1,CFL2,CAMK2B,BMPR1B,MAP2,MAPT,ADCY1,PTPRZ1,SLITRK1,SLITRK3,SLITRK6,SLITRK5,PTPRD,SPTAN1,ILK,LZTS1,STMN1,NR4A2,XK,EPHB3,EPHA5,EPHA7,CHN1,PLXND1,PRKCQ,PRNP,UNC5C,ABLIM1,FLOT1,CLASP1,ATP8A2,CSNK2B,TGFB2,SPTB,BMPR2,MYO10,WASL,SEMA3E,TNR,TRPV2,DCC,PDLIM5,RAPGEF2,TRPC4,ACTR3,CAPRIN2,LLGL1,HOXA1,HOXA2,TMEM106B,ABL1,RND1,LHX2,RNF6,S…	SCN3B,BTBD3,BARHL2,SCN1B,ARHGEF28,CACNB1,CACNB2,CACNB3,CACNB4,AP2S1,ARHGEF12,ARHGEF11,KNDC1,ENAH,NR2E1,ATG7,NET1,LRRK2,ARHGDIA,AP2M1,SARM1,ST8SIA4,SCN8A,ATL1,PAX6,PAX2,DCLK1,ANAPC2,AFG3L2,PARD3,NEO1,AP2A2,AP2A1,FYN,FN1,SPTBN5,SPTBN4,SPTBN2,SPTBN1,CFL2,NEFH,CAMK2B,NEFM,BMPR1B,PTPRM,PTPRO,MAP2,MAP6,MAPT,ARHGEF1,NRCAM,TWF2,ACHE,VAV2,PIP5K1C,VASP,ADCY1,BDNF,HPRT1,PTPRZ1,DSCAM,SLITRK2,SLITRK1,SLITRK4,…	-0.339932	0.000362034	0.0114118
axonogenesis(GO:0007409)	554	1274	119	16330	0.72	435	41536	1.04	CACNB1,CACNB2,CACNB3,CACNB4,AP2M1,PAX2,DCLK1,AFG3L2,NEO1,FYN,SPTBN1,BMPR1B,MAP2,MAPT,ADCY1,PTPRZ1,SLITRK1,SLITRK3,SLITRK6,SLITRK5,SPTAN1,ILK,STMN1,NR4A2,XK,EPHB3,EPHA5,EPHA7,CHN1,PLXND1,PRKCQ,PRNP,UNC5C,ABLIM1,FLOT1,CLASP1,ATP8A2,CSNK2B,TGFB2,SPTB,BMPR2,MYO10,WASL,SEMA3E,TNR,TRPV2,DCC,TRPC4,LLGL1,HOXA1,HOXA2,ABL1,RND1,LHX2,RNF6,SSH2,ITGA9,SPG20,GFRA3,EVL,COBL,STXBP1,COL3A1,OPHN1,CTNNA2,MYCBP2,RPS…	SCN3B,BARHL2,SCN1B,ARHGEF28,CACNB1,CACNB2,CACNB3,CACNB4,AP2S1,ARHGEF12,ARHGEF11,ENAH,NR2E1,ATG7,NET1,ARHGDIA,AP2M1,ST8SIA4,SCN8A,ATL1,PAX6,PAX2,DCLK1,ANAPC2,AFG3L2,PARD3,NEO1,AP2A2,AP2A1,FYN,FN1,SPTBN5,SPTBN4,SPTBN2,SPTBN1,NEFH,NEFM,BMPR1B,PTPRM,PTPRO,MAP2,MAPT,ARHGEF1,NRCAM,TWF2,ACHE,VAV2,PIP5K1C,VASP,ADCY1,BDNF,PTPRZ1,DSCAM,SLITRK2,SLITRK1,SLITRK4,SLITRK3,SLITRK6,SLITRK5,DSCAML1,PARD6B,PAK2,PAK…	-0.362666	0.00036323	0.0114118
nuclear division(GO:0000280)	526	1260	112	16337	0.68	414	41557	0.99	MAPRE3,ANAPC1,ANAPC4,NEK9,NEK6,VRK1,CAMK2B,MAU2,MIS18BP1,KLHL9,DSCC1,REEP3,LZTS2,HAUS6,PDS5B,TOM1L2,KLHL42,XRCC2,ANKLE2,LATS2,LRRCC1,CDC23,CLASP1,MSH6,MSH3,MSH2,MSH5,MSH4,EREG,TXNL4B,SYCP3,WAPL,WASL,DMC1,FBXL7,TTN,ERCC4,CCNA1,RPS6,TDRD9,ACTR3,ACTR2,SPDYA,INCENP,LIG3,ABL1,CLTC,SLC2A8,TOP3A,ASUN,PPP1R12A,IGF1,FIGN,DCTN3,PDGFB,SETDB2,ZNF830,RPS6KA2,DCLRE1A,BMP7,ANAPC10,CENPC,CENPE,CENPV,CENPW,CENPT,…	GEM,ARHGEF10,FANCD2,FSD1,PRMT5,MAPRE2,MAPRE1,MAPRE3,ANAPC1,ANAPC2,ANAPC5,ANAPC4,NEK9,ANAPC7,NEK4,NEK6,NEK1,VRK1,CSNK1A1,MCMBP,ZW10,EML4,CAMK2B,MKI67,HGF,MAP9,ARHGEF2,MAU2,RSPO1,SH2B1,SMC5,SMC2,SMC3,SMC4,MIS18BP1,KLHL9,DSCC1,ENSA,REEP3,REEP4,SPICE1,HEPACAM2,BUB1B,CYP26B1,ZWINT,ARL8A,LZTS2,LMLN,KNTC1,TTYH1,HAUS7,HAUS8,HAUS4,HAUS3,HAUS6,HAUS5,HAUS1,MTBP,NSMCE2,PDS5B,PDS5A,BIRC6,TOM1L1,TOM1L2,SNX9,KL…	-0.373734	0.000368014	0.0114811
regulation of MAP kinase activity(GO:0043405)	277	604	52	16397	0.32	225	41746	0.54	FRS2,LRRK2,PTPRJ,ILK,MAPKAPK5,MAPKAPK2,NEK10,MBIP,TGFB3,ADORA2B,TAB1,GAB1,TP73,TPD52L1,GRM4,PTK2B,PDGFB,GNG3,NOD1,CCL19,KITLG,CHRNA7,PXN,BMP7,TNXB,SPRY4,SPRY2,PDCD10,SPRED2,MLK4,MAP3K7,RGS2,EZH2,RIPK1,GSK3B,RPS27A,CD40,CXCR4,TRIB2,DUS2,SPAG9,DVL3,MAP2K3,FLT1,FLT3,PIK3CB,LPAR2,ZEB2,INSR,PDE5A,C1QTNF2,DAB2IP	GHR,FRS2,LRRK2,GBA,C5AR1,MDFI,SASH1,PTPRJ,MST1R,HGF,FCER1A,MADD,AXIN1,PTPN6,MUL1,PAK3,PAK1,PTPRC,ILK,HYAL2,C5,MAPKAPK5,MAPKAPK3,MAPKAPK2,NEK10,VANGL2,EPHA4,SOD1,MBIP,IRAK3,SORL1,IRAK2,PRKCA,IRAK1,PRKCD,MAGED1,PPP2CA,TENM1,WNT5A,MEF2C,TGFB3,TGFB1,ADORA2B,HACD3,PKN1,APOE,MAP3K10,MAP3K11,ERCC6,SYK,IL1RN,TSC2,INPP5K,TAB1,TAB2,TAB3,S1PR2,GAB1,SRC,CSK,MAPK1,MAPK3,PPEF2,TP73,EGF,P2RX7,ADIPOQ,AJUBA,TPD52…	-0.530351	0.000368986	0.0114811
methylation(GO:0032259)	299	880	57	16392	0.35	242	41729	0.58	ATF7IP,PRMT7,PRMT8,FOS,CAMKMT,FTSJ1,MTRR,MTAP,PICK1,MTA2,TRMT5,SETMAR,SETD6,SETD3,SETD4,GART,TRMT61B,ARID4A,TDRD9,WDR61,FBXO11,NNMT,RRP8,SETDB2,COQ5,COQ3,METTL21C,METTL8,ETF1,PRDM2,LCMT2,GATAD2A,EZH2,ZNF335,TRIM28,GSK3B,SMARCA4,ALKBH8,METTL22,METTL23,METTL12,H1FOO,PEMT,HNMT,ASXL2,EHMT2,TRMT11,RAB3B,RAB3D,TGS1,MTR,DNMT3A,MPHOSPH8,CTCF,CARM1,KDM3A,INMT	ATF7IP,ATRX,PRMT3,PRMT1,PRMT2,PRMT7,PRMT8,PRMT5,PRMT6,BAZ2A,JARID2,PYGO2,TET2,TET1,TET3,FOS,MEPCE,COPRS,N6AMT1,TFB2M,SATB1,TFB1M,CAMKMT,MEN1,FTSJ1,FTSJ3,MTRR,LRTOMT,NDUFAF5,NDUFAF7,MTF2,BCOR,MTAP,PICK1,SNW1,DNMT1,IRF4,EMG1,MTA2,NTMT1,THUMPD3,THUMPD2,DMGDH,CHD5,SMYD3,SMYD4,SMYD2,SMYD5,TRMT1,TRMT5,SARDH,WDR5,WDR4,SETMAR,BTG2,SETD6,SETD7,SETD9,SETD2,SETD3,SETD4,WTAP,GART,SPI1,AS3MT,PHF19,GAMT,TDRKH,…	-0.511484	0.000371919	0.011517
ossification(GO:0001503)	344	676	68	16381	0.41	276	41695	0.66	NEU1,BMPR1B,RSPO2,UFL1,CYR61,ILK,VCAN,ID2,CHRD,PRKD1,ENPP1,CD276,MMP16,IGSF10,TGFB3,TGFB2,BMPR2,DCHS1,TEK,ATRAID,HOXA2,SRGN,SP3,CTHRC1,MAPK8,TFAP2A,ASF1A,GDF2,CLTC,PTK2B,ACVR1,ACVR2A,ACVR2B,TPM4,EIF2AK3,IGF1,HIF1A,MMP9,CTNNB1,SMAD5,SMAD1,BMP7,BMP5,TOB1,FGF9,CLIC1,COL5A2,HSD17B4,RASSF2,RBMX,ANO6,HAND2,PTK2,OSR1,GJA1,APC,COL13A1,RDH14,EGR2,ASXL2,MGP,GLI2,GLI3,CASR,P3H1,NAB1,SUCO,DNAJC13	DHX9,MTSS1,NEU1,IFITM1,HDAC5,HDAC4,HDAC7,SNRNP200,IL6ST,NELL1,WWOX,PIAS2,CSGALNACT1,BMPR1B,BMPR1A,HGF,ACHE,RSPO2,UFL1,ADAR,CYR61,PHOSPHO1,AXIN2,NFE2,MEN1,ILK,PKDCC,SORT1,VCAN,SND1,IARS,ID2,ID1,ID3,HIRA,GTPBP4,BCOR,EPHA2,TXLNG,CYP27B1,PLXNB1,CHRD,PRKD1,IGFBP5,IMPAD1,JAG1,NIPBL,FIGNL1,ADRB2,RRAS2,MSX2,FAM20C,ENPP1,COL11A2,COL11A1,RRBP1,WNT5A,SOX9,SOX8,CD276,PSMC2,WNT11,MEF2C,RORB,SPP1,MMP16,MMP14,I…	-0.466634	0.000379026	0.0116259
glycoprotein biosynthetic process(GO:0009101)	344	848	68	16381	0.41	276	41695	0.66	PARP4,PAWR,GFPT1,HS6ST1,GANAB,NAGPA,ST6GALNAC5,ST6GALNAC6,ST6GALNAC3,ST6GALNAC4,ST6GALNAC2,VCAN,FUT9,FUT8,PREB,MGAT5B,UGGT2,MGAT3,MGAT5,ACER2,GNPNAT1,EXTL1,MAN1A1,DCN,MAN1C1,PMM2,ART4,DPM2,SEC23A,SEC31A,B3GNT9,UBE2J1,IGF1,PRKCSH,STT3A,CTNNB1,CCL21,CCL19,B4GALT3,ALG1,ALG3,ALG5,B3GALT2,B3GALT1,SIRT4,PDIA3,GALNT10,GALNT13,GALNT14,B3GAT3,PGM3,MLEC,NCAN,SLC35C2,ALG11,ALG13,XYLT1,DHDDS,GALNT9,GALNT3,GA…	PARP3,PARP4,PARP1,PARP2,ST8SIA1,ST8SIA3,ST8SIA4,ST8SIA5,PAWR,GFPT1,GFPT2,TET2,TET1,TET3,TNIP1,TIPARP,HS6ST2,HS6ST1,CSGALNACT1,CSGALNACT2,POMGNT1,GANAB,NAGPA,EOGT,SLC51B,GPT,ST6GALNAC5,ST6GALNAC6,ST6GALNAC3,ST6GALNAC4,ST6GALNAC2,VCAN,C1GALT1,ABCA7,MUC1,MUC4,POGLUT1,FUT9,FUT8,FUT7,FUT6,FUT5,FUT4,FUT1,PREB,CHP1,TNKS2,CHPF,BCAN,SRD5A3,LMF1,POFUT2,POFUT1,MGAT5B,MGAT4B,MGAT4A,KCNE1,SOAT1,ST3GAL1,ST3GAL…	-0.466634	0.000379026	0.0116259
regulation of cellular component biogenesis(GO:0044087)	530	1225	113	16336	0.69	417	41554	0.99	ATF7IP,NEU1,HDAC2,SPTBN1,ITGB1BP1,PTPRJ,MAPT,SNCA,PAN3,TBX20,CYR61,SUMO1,SPTAN1,VDAC2,STMN1,EPHB3,KLF5,PLA2G6,PICK1,PRKCH,PRKCE,JMY,SAR1A,BBS4,PSMC6,DNM1L,TGFB3,SPTB,MYO10,WASL,BID,PLEK,TBC1D7,BMP10,CNOT2,CNOT1,TEK,HEY2,PDLIM5,AQP1,RAPGEF2,ACTR3,ACTR2,CLU,ARHGAP6,TM9SF1,ARF1,ABI2,ATAT1,IFT88,FHOD1,FKBP4,RNF5,PPFIA1,SSH2,HNF1A,PTK2B,ELN,WASF2,EVL,TPM1,AMOT,COBL,CDKN1B,STXBP1,STXBP6,HAS3,SENP6,MYAD…	KISS1R,ATF7IP,ARHGEF15,ARHGEF10,MTSS1,ATG5,NEU1,ATG3,HDAC2,HDAC6,MAPRE1,FAF1,FAM110C,NR1H2,ALMS1,PIEZO1,SPTBN5,SPTBN4,SPTBN2,SPTBN1,EML2,ITGB1BP1,PARK7,PECAM1,PTPRJ,MAPT,ARHGEF5,CAPZA2,CAPZA1,TWF1,TWF2,VASP,PPM1F,PPM1E,PPM1A,KIF9,HCK,SNCA,BDNF,NUDT16,PAN3,ADD2,ADD1,PALM,TBX20,CYR61,MIEN1,SUMO1,PAK3,GSN,PAK1,SH3GLB1,SPTAN1,VDAC2,HYAL1,LMO4,IDE,STMN2,STMN1,AVIL,EPHB3,EPHB1,EPHB2,KLF5,EPHA1,EPHA2,EP…	-0.372076	0.000386504	0.0117993
cellular metal ion homeostasis(GO:0006875)	395	967	80	16369	0.49	315	41656	0.75	CACNB4,NEU1,ADRA1A,GCK,FTL,STEAP3,CAMK2D,CYBRD1,SNCA,SLC30A2,SLC30A3,SCARA5,AGTR1,RIC3,XK,BDKRB1,BDKRB2,PLA2G6,TF,FKBP1B,PRKCE,PRNP,TTC7A,JAK2,EDNRB,EPHX2,GRIK2,TRDN,NDFIP1,ATP6V0D1,ATP6V0D2,IBTK,TRPV4,TRPM7,TRPM1,INPP4B,ATP6V1C2,ATP6V1G2,ATP6V1G1,ATP6V1E1,ATP6V1E2,CALM1,SRI,ARF1,ABL1,GDF2,DIAPH1,PTK2B,TPT1,HIF1A,ATP7B,GNG3,CCL21,CCL19,SLC40A1,IREB2,GPR12,CHRNA7,GTF2I,GSTO1,NPTN,SLC24A2,AKAP6,CD4…	CACNB4,ATG5,NEU1,TBXA2R,ADRA1A,GCK,FTL,C5AR1,STEAP3,PDPK1,FXN,MON1A,SLC25A23,SLC25A27,CAMK2D,HFE,SYPL2,NUBP1,CYBRD1,XCL1,NR3C2,VAPB,SNCA,AP3D1,ITPR3,ITPR1,WFS1,FTH1,SLC30A4,SLC30A2,SLC30A3,SLC30A7,PTPN6,SCARA5,PTPRC,AGTR1,CCR10,F2,RIC3,OPRM1,C7,C5,OPRL1,CP,CXCL11,CXCL12,CXCL10,PVALB,ABCB7,ABCB6,CYBA,XK,BDKRB1,BDKRB2,SLC31A2,SLC31A1,PLA2G6,TF,FKBP1A,FKBP1B,TPCN2,SOD1,PRKCA,PRKCE,PRKCB,PRNP,HPX,TTC…	-0.43649	0.000390305	0.0118594
axon development(GO:0061564)	578	1308	125	16324	0.76	453	41518	1.08	CACNB1,CACNB2,CACNB3,CACNB4,AP2M1,PAX2,DCLK1,AFG3L2,NEO1,FYN,SPTBN1,BMPR1B,MAP2,MAPT,ADCY1,PTPRZ1,SLITRK1,SLITRK3,SLITRK6,SLITRK5,SPTAN1,ILK,STMN1,NR4A2,XK,EPHB3,EPHA5,EPHA7,FKBP1B,CHN1,PLXND1,PRKCQ,PRNP,UNC5C,ABLIM1,JAK2,FLOT1,CLASP1,ATP8A2,CSNK2B,TGFB2,SPTB,BMPR2,MYO10,WASL,SEMA3E,TNR,TRPV2,DCC,TRPC4,LLGL1,HOXA1,HOXA2,ABL1,RND1,LHX2,RNF6,SSH2,ITGA9,SPG20,GFRA3,STK24,EVL,COBL,STXBP1,COL3A1,OPHN1…	SCN3B,BARHL2,SCN1B,ARHGEF28,CACNB1,CACNB2,CACNB3,CACNB4,AP2S1,ARHGEF12,ARHGEF11,ENAH,NR2E1,ATG7,NET1,ARHGDIA,AP2M1,ST8SIA4,SCN8A,ATL1,PAX6,PAX2,DCLK1,ANAPC2,AFG3L2,PARD3,NEO1,AP2A2,AP2A1,FYN,FN1,SPTBN5,SPTBN4,SPTBN2,SPTBN1,NEFH,NEFM,BMPR1B,PTPRM,PTPRO,MAP2,MAPT,ARHGEF1,NRCAM,TWF2,ACHE,VAV2,PIP5K1C,VASP,ADCY1,BDNF,PTPRZ1,DSCAM,SLITRK2,SLITRK1,SLITRK4,SLITRK3,SLITRK6,SLITRK5,DSCAML1,PARD6B,PAK2,PAK…	-0.354088	0.000401627	0.0121464
single-organism cellular localization(GO:1902580)	505	1193	107	16342	0.65	398	41573	0.95	RPLP0,CACNB1,LRRK2,AP2M1,RAB3GAP1,SPTBN1,ITGB1BP1,RPL18,RPL19,RPL12,RPL35,RPL36,RPL39,RPL32,RPL34,RPL26,RPL23,RPL21,TSPAN15,FCER1G,AR,PPP3CC,PICK1,SYNE3,NDUFA13,RAB3IP,FLOT1,MICALL1,CLASP1,GRIK2,WAPL,WASL,BID,KCTD7,SPCS3,RPSA,RPS6,RPS5,RPL7,RPL6,RPL3,RPS2,ACTR3,ACTR2,SFN,CLU,TM9SF1,RAMP3,MAPK8,IFT122,DENND4C,PEX26,PEX5L,GOLGA4,PPFIA1,PEX12,CLTC,ZFYVE27,LYPLAL1,PACSIN1,SCP2,MYADM,SRP68,SRP54,TOMM2…	SCN3B,RPLP2,RPLP0,RPLP1,LRRC4,CACNB1,ARHGEF16,LRRK2,AP2M1,ATG3,HDAC8,PAX6,RAB3GAP2,RAB3GAP1,PDPK1,PARD3,LYPLA1,SEC61B,TESC,SPTBN4,SPTBN1,ZW10,ITGB1BP1,RPL18,RPL17,RPL19,RPL14,RPL15,RPL10,RPL11,RPL12,HGS,MAP4,MAP7,ARHGEF2,RPL3L,RPL35,RPL36,RPL37,RPL39,RPL30,RPL32,RPL31,RPL34,RPL26,RPL27,RPL24,RPL28,RPL29,RPL23,RPL22,RPL21,SLC51B,PIP5K1A,ATG4C,TSPAN33,TSPAN14,TSPAN15,GET4,PALM,FCER1G,AP3D1,SLC4A5,W…	-0.379911	0.000406682	0.0121854
single-organism localization(GO:1902578)	505	1193	107	16342	0.65	398	41573	0.95	RPLP0,CACNB1,LRRK2,AP2M1,RAB3GAP1,SPTBN1,ITGB1BP1,RPL18,RPL19,RPL12,RPL35,RPL36,RPL39,RPL32,RPL34,RPL26,RPL23,RPL21,TSPAN15,FCER1G,AR,PPP3CC,PICK1,SYNE3,NDUFA13,RAB3IP,FLOT1,MICALL1,CLASP1,GRIK2,WAPL,WASL,BID,KCTD7,SPCS3,RPSA,RPS6,RPS5,RPL7,RPL6,RPL3,RPS2,ACTR3,ACTR2,SFN,CLU,TM9SF1,RAMP3,MAPK8,IFT122,DENND4C,PEX26,PEX5L,GOLGA4,PPFIA1,PEX12,CLTC,ZFYVE27,LYPLAL1,PACSIN1,SCP2,MYADM,SRP68,SRP54,TOMM2…	SCN3B,RPLP2,RPLP0,RPLP1,LRRC4,CACNB1,ARHGEF16,LRRK2,AP2M1,ATG3,HDAC8,PAX6,RAB3GAP2,RAB3GAP1,PDPK1,PARD3,LYPLA1,SEC61B,TESC,SPTBN4,SPTBN1,ZW10,ITGB1BP1,RPL18,RPL17,RPL19,RPL14,RPL15,RPL10,RPL11,RPL12,HGS,MAP4,MAP7,ARHGEF2,RPL3L,RPL35,RPL36,RPL37,RPL39,RPL30,RPL32,RPL31,RPL34,RPL26,RPL27,RPL24,RPL28,RPL29,RPL23,RPL22,RPL21,SLC51B,PIP5K1A,ATG4C,TSPAN33,TSPAN14,TSPAN15,GET4,PALM,FCER1G,AP3D1,SLC4A5,W…	-0.379911	0.000406682	0.0121854
cellular response to peptide hormone stimulus(GO:0071375)	314	729	61	16388	0.37	253	41718	0.6	FRS2,GCK,FYN,GFPT1,ADCY3,ADCY4,ADCY1,ADCY2,ADCY6,MBD5,GHRHR,PRKCQ,IGFBP1,JAK2,ENPP1,USF1,ATP6V0D1,ATP6V0D2,FOXO1,RPS6,TBC1D4,MZB1,GAB1,ATP6V1C2,ADAM17,CAB39L,ATP6V1G2,ATP6V1G1,ATP6V1E1,ATP6V1E2,CRK,ARG1,DENND4C,SLC2A8,LPIN1,SREBF1,CTNNB1,GNG3,RPS6KB1,PXN,EIF4G1,FGF9,EEF2K,RAF1,PPARG,PHIP,ANKRD26,CPS1,PTK2,VWA2,RHOQ,NCOA5,FGF20,EGR1,PIK3CB,MAX,RAB10,PRKAG1,PIK3R4,INSR,CRHR2	PARP1,GHR,FRS2,HDAC5,HDAC9,PAX6,GCK,PPAT,CPEB2,PDPK1,FYN,GFPT1,MDM2,AP3S1,FFAR3,GNG13,GNG11,GNG12,MAS1,GNG10,PPM1A,SH2B2,ADCY3,ADCY4,ADCY1,ADCY2,ADCY7,ADCY8,ADCY5,ADCY6,NFKB1,ADCY9,SOCS2,PTPN6,PTPN2,PTPN1,PAK1,PTPRE,PTPRA,ACSL6,STRADA,STRADB,IDE,MTUS1,GHSR,MBD5,GHRHR,MTOR,PRKCA,PRKCI,PRKCD,UBE2B,PRKCB,PRKCQ,NGFR,PRKCZ,PRKDC,PRLR,IGFBP1,SOS1,PRKAR2B,PRKAR2A,IRS1,PRKAR1B,PRKAR1A,JAK2,JAK3,ENPP1,OSB…	-0.488132	0.000412937	0.0122593
negative regulation of hydrolase activity(GO:0051346)	314	853	61	16388	0.37	253	41718	0.6	TFPI,LRRK2,PAX2,PCDH11X,SNCA,PCIF1,TRIAP1,FKBP1B,PLA2R1,RBM26,CYTB,C4A,USP14,TGFB2,MPHOSPH10,UBN1,PPP4R4,SYTL2,APOA2,AQP1,SFN,GPATCH2,NLE1,MAPK7,ABL1,UCHL5,SPOCK1,AMOT,CDKN2D,WNK1,RPS6KA1,DHCR24,GMIP,SERPINE3,SERPINI2,SERPINA5,SERPINA3,SERPINA1,SERPINB9,SERPINC1,SPRY2,RAF1,FARP1,SH3BP4,PPP1R36,CMYA5,TNFAIP8,RGS2,BICD1,ZCCHC9,SPINK6,CRB2,PTTG1,TIPRL,SERPINA10,SERPINA11,TIMP4,KDM5A,ANXA8,DAB2IP,RFFL	TFPI,PTPRN2,LRRK2,PAX2,CPEB2,PCDH11X,PPIF,MDM2,PARK7,PECAM1,HGF,ANGPTL3,ANGPTL4,GCHFR,SNCA,CST9L,PAK2,GPI,PCID2,PCIF1,SORT1,WNT9A,C3,C5,ABCA7,NR4A1,IFI16,KLF4,TRIAP1,FKBP15,WFIKKN1,FKBP1A,FKBP1B,BIRC6,PLXNB3,CHP1,SORL1,PRKCZ,HRG,PLA2R1,HPN,ATPIF1,ADCYAP1,NEIL1,HERPUD1,SEBOX,DLG3,DLG2,CD2BP2,RBM26,PEBP1,CYTB,PSMF1,OXA1L,C4A,SPP2,FNIP1,GAS6,USP14,USP47,TGFB2,ARRB2,ARRB1,MYO1D,MPHOSPH10,SLC7A14,CD10…	-0.488132	0.000412937	0.0122593
monovalent inorganic cation transport(GO:0015672)	439	1393	91	16358	0.55	348	41623	0.83	SCN3A,ATP6,SCN2A,SCN1A,SLC3A2,SCN9A,SCN7A,SCN5A,GCK,WWP2,ATP5A1,CAMK2D,SLC4A7,ATP5J2,ATP5G2,ATP5G3,SLC15A1,SLC15A2,KLHL3,PRKCE,PRNP,SLC5A6,KCNK9,KCNJ3,KCNK1,KCNK2,KCNJ4,SCN11A,KCND2,KCNT2,KCNS3,KCNQ5,SLC17A8,ATP6AP1L,ATP6V0D1,ATP6V0D2,AQP1,COX6A1,ATP6V1C2,ATP6V1G2,ATP6V1G1,ATP6V1E1,ATP6V1E2,NALCN,PKD2L1,COX7A2,PTK2B,MTMR6,CDKN1B,OXSR1,COX10,ATP5O,SLC4A10,FHL1,HCN1,SLC38A7,SLC38A6,KIF5B,KCNJ15,KCN…	SCN3A,SCN3B,ATP6,SCN2B,SCN2A,SCN1A,SCN1B,SLC3A2,SCN9A,SCN8A,SCN7A,SCNN1G,SCNN1B,SCN5A,SCNN1A,GCK,SCN4B,SCN4A,WWP2,ABCB11,ATP5C1,ATP5A1,TESC,SPTBN4,PPIF,CAMK2D,PARK7,SLC4A8,SLC4A7,ATP5J2,ATP5G2,ATP5G3,ATP5F1,SLC15A1,SLC15A2,KLHL3,SLC4A4,SLC4A5,PTPN3,KCNAB3,KCNAB2,KCNAB1,TMCO3,CATSPER3,CHP1,SLC5A3,UQCRC1,SLC5A1,UQCRFS1,PRKCE,PRNP,HPN,SLC5A6,KCNK9,KCNK7,KCNK6,KCNK5,KCNJ2,KCNJ3,ADCYAP1,KCNK1,KCNK2,KC…	-0.407407	0.000425583	0.0125199
calcium ion homeostasis(GO:0055074)	294	717	56	16393	0.34	238	41733	0.57	CACNB4,NEU1,ADRA1A,GCK,CAMK2D,SNCA,AGTR1,RIC3,XK,BDKRB1,BDKRB2,PLA2G6,FKBP1B,PRKCE,JAK2,EDNRB,EPHX2,GRIK2,TRDN,IBTK,TRPV4,TRPM1,INPP4B,CALM1,SRI,ABL1,DIAPH1,PTK2B,TPT1,ATP7B,GNG3,CCL21,CCL19,GPR12,CHRNA7,GTF2I,GSTO1,NPTN,SLC24A2,AKAP6,CD40,CD55,JPH3,GJA1,JPH1,CXCR4,CUL5,PIK3CB,RYR2,LPAR2,ATP2A1,CASR,PDE4D,CACNA1C,RAP1GDS1,ERO1A	CACNB4,ATG5,NEU1,TBXA2R,ADRA1A,GCK,C5AR1,PDPK1,SLC25A23,SLC25A27,CAMK2D,SYPL2,XCL1,VAPB,SNCA,ITPR3,ITPR1,WFS1,PTPN6,PTPRC,AGTR1,CCR10,F2,RIC3,OPRM1,C5,OPRL1,CXCL11,CXCL12,CXCL10,PVALB,CYBA,XK,BDKRB1,BDKRB2,PLA2G6,FKBP1A,FKBP1B,TPCN2,CYP27B1,TMTC2,PRKCA,PRKCE,PRKCB,ADCYAP1,KCNA5,MICU1,HERPUD1,DLG4,JAK2,FAM20A,EDNRA,EDNRB,EPHX2,BBC3,GRIK2,TGFB1,GRIN1,GRINA,TRDN,APOE,STOML2,IBTK,TRPV4,HEXB,TRPM8,ESR…	-0.512481	0.000424666	0.0125199
positive regulation of response to wounding(GO:1903036)	75	225	8	16441	0.05	67	41904	0.16	FCER1G,AGTR1,FKBP1B,PRKCE,JAK2,ADORA2B,GPRC5B,IL15	IL6ST,TNIP1,CLOCK,FFAR3,TLR10,FCER1G,FCER1A,SCARF1,AGTR1,HYAL2,C3,PLA2G7,FKBP1B,PRKCA,PRKCE,SEBOX,JAK2,ADORA3,EDNRA,WNT5A,ADORA2B,IL23A,MYLK,TNFRSF1A,NTRK3,ITGA2,HBEGF,KANK1,IDO1,STAT5A,STAT5B,VEGFB,IL1RL1,OSM,PTGS2,S100A9,MAPK13,CNR1,HRAS,SERPINE1,GPRC5B,RPS19,TLR2,TLR4,TLR7,OSMR,IL18,IL15,IL1B,IL33,CCR2,AGT,NPY5R,EGFR,CX3CL1,LBP,PIK3CG,ARFGEF1,FABP4,PTGER3,PTGER4,NDEL1,TGM2,ADAM8,PDE2A,S100A12,…	-1.18965	0.00042803	0.0125349
neurotrophin TRK receptor signaling pathway(GO:0048011)	305	793	59	16390	0.36	246	41725	0.59	FRS2,AP2M1,HDAC3,HDAC2,FYN,ARHGEF4,ARHGEF6,ADCY3,ADCY4,ADCY1,ADCY2,ADCY6,ITPR2,MAPKAPK2,ADCYAP1R1,CHUK,PRKCE,RASGRF2,NFKBIA,EREG,PHLPP2,FOXO1,GAB1,AKAP13,ADAM17,CALM1,CRK,MAPK8,MAPK7,ZFYVE27,CDKN1B,PDGFB,DNAL4,RPS6KA1,RPS6KA2,KIDINS220,KITLG,MAPKAP1,FGF9,RALA,FGD4,SPRY2,RAF1,MYD88,TNRC6C,ERBB4,RTN4,GSK3B,RPS27A,NRG2,APH1B,AGO2,FGF20,ITSN1,PIK3CB,IKBKB,CASP3,ULK1,PDE1C	AP2S1,ARHGEF18,ARHGEF16,ARHGEF17,ARHGEF12,ARHGEF11,FRS2,NET1,BEX3,ATF1,ARHGDIA,AP2M1,HDAC3,HDAC2,HDAC1,PDPK1,AP2A2,AP2A1,FYN,MDM2,ARHGEF4,ARHGEF3,ARHGEF2,ARHGEF1,ARHGEF7,ARHGEF6,ARHGEF9,VAV3,VAV2,VAV1,ADCY3,ADCY4,ADCY1,ADCY2,ADCY7,ADCY8,ADCY5,ADCY6,NFKB1,ITPR3,ITPR1,ITPR2,ADCY9,SORT1,MAPKAPK3,MAPKAPK2,NR4A1,RIT1,ADCYAP1R1,MTOR,CHUK,PRKCA,IRAK1,PRKCI,PRKCG,PRKCE,PRKCD,NGFR,NGEF,MAGED1,ADCYAP1,PLEK…	-0.493365	0.000434286	0.012589
regulation of vesicle-mediated transport(GO:0060627)	306	629	59	16390	0.36	247	41724	0.59	LRRK2,EXPH5,STXBP5L,SNCA,FCER1G,LRRTM2,LRRTM1,C2,PLA2G6,PICK1,CADPS2,PRKD1,AP1G1,SAR1A,MERTK,C4A,SCYL2,ADORA2B,WASL,TUB,KCTD7,TBC1D4,ARF1,ABL1,AAK1,ZFYVE16,SCFD1,SMAP1,LYPLAL1,STXBP1,STXBP6,STXBP5,SNX17,OPHN1,CCL21,CCL19,LRSAM1,RALA,C4BPB,C4BPA,PPARG,STON1,SYT1,SYT9,GOPC,RAB27A,BICD1,CD14,LDLRAP1,PIK3CB,RAB21,RAB15,RIMS2,RAB3B,RAB3C,RAB3D,PCLO,ANGPT1,HNRNPK	BTBD9,AP2S1,LRRK2,NR1H2,NR1H3,PDPK1,LYPLA1,YIPF5,CAMK1D,ATXN2,PPT1,EXPH5,STXBP5L,RSPO1,HCK,SNCA,ADD1,FCER1G,FCER1A,SCARB1,PTPN1,PKDCC,C3,LRRTM2,LRRTM1,C2,ACSL3,VAMP8,VAMP4,ABCA7,HIP1,PLA2G6,PICK1,SNX3,CADPS2,SORL1,PRKD1,MBL2,SYNJ1,AP1G1,SAR1A,SEBOX,MERTK,HMOX1,DLG4,ADORA3,DKK1,USE1,FOXF1,C4A,SCYL2,GAS6,GRIK5,TGFB1,MIB1,ARRB2,ARRB1,ADORA2B,WASL,CBL,BCR,PRAM1,TUB,KCTD7,SYK,SYTL4,TRPV6,TBC1D4,APOA5,…	-0.497446	0.000435714	0.012589
coenzyme metabolic process(GO:0006732)	232	580	42	16407	0.26	190	41781	0.45	GCK,MDH1,DHFR,STEAP4,SLC25A32,ACOT12,SNCA,TDO2,MTRR,SLC5A6,ELOVL4,ELOVL2,MCEE,VNN1,VNN2,GART,HIBADH,DLST,SHMT1,FPGS,MTHFD1,KYNU,AASS,TP53I3,COQ5,COQ4,COQ3,COQ2,RPE,GPHN,HSD17B4,GLYR1,CRYM,CROT,PDP2,OGDH,ME1,ACSM2A,MVK,DGAT2,PCK2,CBR3	ATIC,GCK,PPCS,MDH2,MDH1,DHFR,STEAP4,SLC25A32,ACOT12,ASPDH,FTCD,ACLY,TECR,SNCA,NUDT12,NFS1,UBIAD1,TDO2,PGAM1,AASDHPPT,MTRR,ACSL1,ACSL4,ACSL6,ACSL5,FOLH1,COASY,G6PD,ACSS2,ACSS1,FOLR1,SLC5A6,NMRK1,NMRK2,DLAT,ELOVL1,ELOVL5,ELOVL4,ELOVL2,ELOVL7,ELOVL6,NMNAT3,NMNAT2,NMNAT1,CYB5R4,MCEE,QDPR,CYP4F2,VNN1,VNN2,GART,APIP,HIBADH,IDH1,FDXR,TKT,RPIA,NADSYN1,DLST,MAT1A,TGFBR1,GRHPR,SHMT1,SHMT2,MAT2A,MAT2B,H6PD,…	-0.574621	0.000432717	0.012589
nucleocytoplasmic transport(GO:0006913)	500	1056	106	16343	0.64	394	41577	0.94	NXF1,SPTBN1,TONSL,ATXN1,NUTF2,RPL23,IPO5,PPM1B,KPNA5,KPNA3,KPNA1,LZTS2,TMCO6,CPSF3,CPSF2,JAK2,RBM22,NFKBIA,TGFB3,TGFB2,RPSA,TEK,INPP4B,AKAP13,SFN,SET,SRI,MAPK7,SRSF2,SRSF7,SRSF9,IER3,ABRA,DDX25,U2AF2,UHMK1,PPP1R12A,IGF1,CDKN2A,CCHCR1,NOP58,NSRP1,UPF3B,CCL19,SMAD4,BMP7,TOB1,DDX39B,RAE1,FGF9,UPF1,RALA,RAN,PHIP,FYTTD1,AKAP6,PHAX,ERBB4,PDIA3,PPP1R10,HSPA9,ANKRD54,DHX38,RAB27A,JUP,THOC7,THOC1,TRIM28,G…	NXF1,PARP1,ANP32A,ANP32B,SARNP,SLBP,FAF1,MDFI,NEMF,FYB,SEC61B,SPTBN1,NLRP3,MDM2,PBLD,TONSL,PARK7,ATXN1,RSRC1,BMPR1A,RANBP17,NUTF2,SMN1,RPL23,MAVS,SMG6,SMG7,SMG1,IPO9,IPO7,IPO5,PPM1A,PPM1B,MBTPS1,ADAR,ENY2,MED1,NEUROD1,ARNTL,AXIN2,AXIN1,KPNB1,KPNA6,KPNA5,KPNA4,KPNA3,KPNA2,KPNA1,LZTS2,TMCO6,HYAL2,PPP3CA,STRADA,LMNA,STRADB,PABPN1,RAB40C,RAB40B,RIT1,BCL3,BCL6,CHP2,CHP1,ZC3H3,AGFG1,HTT,MTOR,FBXW11,HHE…	-0.379164	0.000459508	0.0131825
regulation of cell morphogenesis(GO:0022604)	417	922	86	16363	0.52	331	41640	0.79	LRRK2,PAX2,FYN,ITGB1BP1,CFL2,CAMK2B,MAPT,PTPRD,ILK,LZTS1,TTC3,XK,EPHB3,CHN1,SYNE3,BBS4,TBX5,ELL3,TGFB3,TGFB2,BMPR2,FOXA1,MYO10,ERMN,SEMA3E,TNR,ARAP3,TRPV2,TBC1D7,DCC,PDLIM5,RAPGEF2,ACTR3,CAPRIN2,IFT88,RNF6,DIAPH1,SSH2,SPG20,PTK2B,WASF3,COCH,ARHGAP15,CTNNB1,MYADM,LIMK1,WDPCP,CAPZB,PXN,SMAD4,SMAD1,BMP5,FGD5,FGD4,PHIP,ROBO1,ROBO2,RTN4,KIF13B,EZH2,GSK3B,LRP8,LRRC4C,PTK2,RGCC,CDC42EP1,GORASP1,PRPF40A,…	BARHL2,ARHGEF18,BRWD3,BRWD1,PARVB,PARVA,KNDC1,NR2E1,ATG5,NET1,LRRK2,ARHGDIA,ATG3,SARM1,PAX2,PAX8,ANAPC2,FYN,FN1,LARP4,ITGB1BP1,CFL2,PBLD,CAMK2B,NEFM,PTPRO,SDHAF2,MAPT,ARHGEF1,ARHGEF7,NRCAM,TWF2,ACHE,HCK,ZRANB1,BDNF,PALM,DSCAM,AXIN2,PAK3,BVES,PTPRD,ILK,F2,LZTS1,CXCL12,CIB1,TTC3,S100B,XK,EPHB3,EPHB2,EPHA3,EPHA4,CHN1,PLXNA3,PLXNA4,PLXNB1,PLXNB2,LDLRAD4,NGFR,NGEF,HPN,POFUT2,DLC1,SYNE3,FBLIM1,PPP2CA,B…	-0.413733	0.000460328	0.0131825
organelle fission(GO:0048285)	559	1336	121	16328	0.74	438	41533	1.04	LRRK2,MAPRE3,ANAPC1,ANAPC4,NEK9,NEK6,VRK1,CAMK2B,MAU2,ACOX1,MIS18BP1,KLHL9,DSCC1,REEP3,LZTS2,HAUS6,PDS5B,TOM1L2,KLHL42,XRCC2,ANKLE2,LATS2,LRRCC1,CDC23,CLASP1,MSH6,DNM1L,MSH3,MSH2,MSH5,MSH4,EREG,TXNL4B,SYCP3,WAPL,WASL,DMC1,FBXL7,TTN,ERCC4,CCNA1,RPS6,DHODH,TDRD9,ACTR3,ACTR2,SPDYA,INCENP,LIG3,ABL1,CLTC,SLC2A8,LPIN1,TOP3A,ASUN,PPP1R12A,IGF1,FIGN,DCTN3,COX10,PDGFB,SETDB2,ZNF830,RPS6KA2,DCLRE1A,BMP7,AN…	GEM,ARHGEF10,FANCD2,FSD1,LRRK2,ATG3,PRMT5,MAPRE2,MAPRE1,MAPRE3,ANAPC1,ANAPC2,ANAPC5,ANAPC4,NEK9,ANAPC7,NEK4,NEK6,NEK1,VRK1,CSNK1A1,MCMBP,ZW10,EML4,CAMK2B,OPA1,MKI67,HGF,MAP9,ARHGEF2,MAU2,ACOX1,RSPO1,SH2B1,SMC5,SMC2,SMC3,SMC4,MIS18BP1,KLHL9,DSCC1,ENSA,MUL1,REEP3,REEP4,SPICE1,HEPACAM2,BUB1B,CYP26B1,ZWINT,ARL8A,LZTS2,LMLN,KNTC1,TTYH1,HAUS7,HAUS8,HAUS4,HAUS3,HAUS6,HAUS5,HAUS1,MTBP,NSMCE2,PDS5B,PDS5A,…	-0.352821	0.000464432	0.0132414
in utero embryonic development(GO:0001701)	380	485	77	16372	0.47	303	41668	0.72	HS6ST1,RSPO3,COPS3,NR2F2,CYR61,MAFF,AR,FUT8,APBA2,XRCC4,XRCC2,CHD7,TBX3,B9D1,MSH2,SPIC,TGFB3,APOB,TTN,CNOT2,HEY2,TAB1,GAB1,SP3,MED21,NLE1,EPN2,G2E3,MFN2,WDR74,PCDH12,HNF1A,ACVR1,TERF2,POLE,TPM1,PLCD1,AMOT,PRKCSH,HIF1A,ZFPM2,PDGFB,ZNF830,CTNNB1,KIDINS220,SMAD4,GATA6,GATA4,MKL2,GATAD2A,HAND1,HAND2,ZNF335,CSF2,TRIM28,IL10,RNASEH2B,SMARCA4,CCM2,GJA1,CCNK,BRCA2,EPAS1,NCOA1,NCOA3,CDH1,SLIT2,TJP1,CUL3,E…	MTSS1,TFEB,PRMT1,MDFI,ZFP36L1,PYGO2,TET1,ZMIZ1,HINFP,HS6ST1,BMPR1A,PTPRR,RSPO3,ADD1,ADAR,COPS3,RESP18,NR2F2,CYR61,MED1,ARNT2,AXIN1,MAFG,MAFF,NFE2,GRN,ELF3,AR,C6,C5,KLF1,MBD3,FUT8,APBA3,APBA2,APBA1,BIRC6,UBE2A,UBE2B,XRCC4,XRCC2,MYO18B,JAG2,HHEX,CHD8,CHD7,PITX2,MGAT1,EDNRA,SPEG,TBX3,B9D1,SOX5,SOX6,SOX8,BTF3,PSMC4,MSH2,SETD2,FOXF1,SPIC,TGFB3,MIB1,FBXW8,MYO1E,ICMT,APOB,BYSL,UBR3,KRT19,NSDHL,SNAI1,TTN…	-0.435766	0.00046825	0.0132917
brain development(GO:0007420)	624	1038	137	16312	0.83	487	41484	1.16	FRS2,LRRK2,HDAC2,PAX2,SCN5A,DCLK1,RAB3GAP1,ACAT1,ZFHX3,FYN,TTC21B,KIRREL3,EML1,PTPRS,SLC4A7,NR2F2,NEUROD6,SLITRK5,STMN1,NR4A2,ID2,EPHB3,EPHA5,EPHA7,GHRHR,CHRD,XRCC5,UNC5C,BBS4,BBS7,CHD7,PFKFB3,TBX3,SLC6A4,GART,BMPR2,ATP6V0D1,BID,TTN,FOXJ1,TNR,ARID1A,ESR2,DBI,AQP1,RAPGEF2,CALM1,HOXA1,HOXA2,FPGS,NLGN4X,TP73,ATAT1,TFAP2A,ABL1,IFT88,EPOR,LHX2,LHX6,NME5,NME2,CLN5,UCHL5,NKX2-2,EN1,IGF1,HIF1A,COL3A1,CTN…	BTBD3,BARHL1,ANP32B,KNDC1,ATRN,ATRX,NR2E1,ATG7,FRS2,LRRK2,GLUD1,ATF5,HDAC2,PAX6,PAX2,GAK,ATIC,SCN5A,DCLK1,FRZB,RAB3GAP1,C5AR1,ACAT1,ZFHX3,AVPR2,FYN,PYGO2,TTC21B,SPTBN2,KIRREL3,EML1,ATXN2,BMPR1A,PTPRG,PTPRS,NAGLU,PPT1,SYPL2,SPHK2,MAOB,SYNGR3,QARS,GNG12,MAS1,SLC4A7,KIF7,ATP5F1,NR2F2,NR2F1,MED1,HPRT1,NEUROD2,NEUROD1,NEUROD6,ARNT2,SLITRK5,DSCAML1,AXIN1,MEN1,NFIX,ENO3,BDH1,INA,MCPH1,SNPH,PGAP1,ACSL3,C…	-0.334876	0.000471974	0.0133323
neurotrophin signaling pathway(GO:0038179)	310	807	60	16389	0.36	250	41721	0.6	FRS2,AP2M1,HDAC3,HDAC2,FYN,ARHGEF4,ARHGEF6,ADCY3,ADCY4,ADCY1,ADCY2,ADCY6,ITPR2,MAPKAPK2,ADCYAP1R1,CHUK,PRKCE,RASGRF2,NFKBIA,EREG,PHLPP2,FOXO1,GAB1,RAPGEF2,AKAP13,ADAM17,CALM1,CRK,MAPK8,MAPK7,ZFYVE27,CDKN1B,PDGFB,DNAL4,RPS6KA1,RPS6KA2,KIDINS220,KITLG,MAPKAP1,FGF9,RALA,FGD4,SPRY2,RAF1,MYD88,TNRC6C,ERBB4,RTN4,GSK3B,RPS27A,NRG2,APH1B,AGO2,FGF20,ITSN1,PIK3CB,IKBKB,CASP3,ULK1,PDE1C	AP2S1,ARHGEF18,ARHGEF16,ARHGEF17,ARHGEF12,ARHGEF11,FRS2,NET1,BEX3,ATF1,ARHGDIA,AP2M1,HDAC3,HDAC2,HDAC1,PDPK1,AP2A2,AP2A1,FYN,MDM2,ARHGEF4,ARHGEF3,ARHGEF2,ARHGEF1,ARHGEF7,ARHGEF6,ARHGEF9,VAV3,VAV2,VAV1,ADCY3,ADCY4,ADCY1,ADCY2,ADCY7,ADCY8,ADCY5,ADCY6,NFKB1,ITPR3,ITPR1,ITPR2,ADCY9,SORT1,MAPKAPK3,MAPKAPK2,NR4A1,RIT1,ADCYAP1R1,MTOR,CHUK,PRKCA,IRAK1,PRKCI,PRKCG,PRKCE,PRKCD,NGFR,NGEF,MAGED1,ADCYAP1,PLEK…	-0.492722	0.000473798	0.0133323
regulation of neurotransmitter levels(GO:0001505)	156	363	25	16424	0.15	131	41840	0.31	LRRK2,RAB3GAP1,CAMK2A,SNCA,CADPS2,SLC6A12,SLC6A13,SLC6A4,SNAP25,DAGLA,ABAT,GRM4,STXBP1,ALDH2,SYT1,SLC22A3,SLC44A4,RIMS2,RIMS1,RAB3B,PCLO,STX7,CACNA1B,NRXN3,NRXN1	GFAP,LRRK2,RAB3GAP1,XBP1,CAMK2A,PARK7,PPT1,MAOA,ACHE,PIP5K1C,GCHFR,SNCG,SNCA,GLS,SNPH,LRTOMT,VAMP1,TH,CADPS2,DTNBP1,SLC18A2,SYNJ1,KCNC4,KCNC3,SLC6A11,SLC6A12,SLC6A13,ALDH9A1,SLC32A1,SLC6A1,SLC6A3,SLC6A4,SLC17A7,SLC17A6,MEF2C,NAALAD2,SNAP25,GRIK5,SYDE1,DAGLA,DAGLB,SNAPIN,TOR1A,GAD2,GAD1,ABAT,UNC13B,UNC13A,SYT11,P2RX7,SLC1A3,NTRK2,GRM4,PPFIA3,CLN3,HCRT,ALDH5A1,DOC2A,STXBP1,COLQ,LIN7B,LIN7C,LIN7A,AL…	-0.721212	0.000476779	0.0133581
rhythmic process(GO:0048511)	237	477	43	16406	0.26	194	41777	0.46	HDAC3,HDAC2,SGPL1,GFPT1,BMPR1B,ADCY1,CRTC1,ID2,IMMP2L,MSTN,SLC6A4,PPP1CB,MSH4,EREG,CSNK1E,DMC1,FBXL3,ESR2,PROKR2,SREBF1,CTNNA1,RAI1,NCOR1,ROBO2,ROCK2,HOMER1,EZH2,AXL,GSK3B,DYRK1A,NRIP1,PSPC1,NCOA1,SLIT2,EGR1,EGR2,INHBA,TIMP4,KDM5A,EIF2B2,EIF2B4,EIF2B5,CBX3	BTBD9,PPP1CA,DHX9,ATF5,HDAC3,HDAC2,HDAC1,PRMT5,SGPL1,NR1H3,NR1D1,NR1D2,GFPT1,NHLH2,PLEKHA1,BMPR1B,NAGLU,HLF,CLOCK,NFYA,ADCY1,BDNF,NFKB2,NR2F6,ARNTL,F7,CRTC1,ID2,ID1,ID3,PRKG2,TH,SOD1,IMMP2L,NGFR,UBE3A,PRKDC,MAGED1,ADCYAP1,MSTN,FBXW11,MTA1,NFIL3,CREB1,ADORA1,RBM4B,SLC6A4,PPP1CC,PPP1CB,CMPK1,MSH4,RORC,RORB,RORA,MMP19,MMP14,EREG,CSNK1D,CSNK1E,ARRB2,GRIN1,DMC1,PHLPP1,FBXL3,FOXO3,TEF,TAF4,DDC,ESR1,ESR…	-0.571959	0.000482643	0.0134641
regulation of symbiosis, encompassing mutualism through parasitism(GO:0043903)	165	486	27	16422	0.16	138	41833	0.33	APOBEC3H,APOBEC3C,PPIA,NELFE,PLS1,CCNT1,TAF11,GTF2H4,SRPK1,MYD88,TRIM13,TRIM28,TRIM26,IL10,SMARCA4,TRIM35,TRIM31,SP100,TCEB1,DICER1,CDK9,POLR2H,POLR2G,POLR2F,ILF3,DERL1,CHMP2A	IFITM1,IFITM2,IFITM3,HDAC1,ADARB1,SUPT16H,APOBEC3H,APOBEC3C,PPIH,PPIA,PPID,NELFA,NELFB,NELFE,TNIP1,MAVS,VAPB,YTHDC2,ADAR,TFAP4,IFI16,SNX3,SNW1,MBL2,HPN,IRF8,NR5A2,RNASEL,TIRAP,VPS4B,MID2,PLSCR1,HS3ST5,PM20D1,TAP2,TAP1,ERCC3,ERCC2,PLS1,BCL2L11,INPP5K,CCNT1,TARDBP,SP1,ISG20,ISG15,PROX1,TAF11,ITGAV,GTF2H4,GTF2H3,GTF2H2,GTF2H1,SUPT4H1,GTF2F1,GTF2F2,TARBP2,ELL,TOP2A,DYNLT1,EIF2AK2,SSRP1,NCBP2,NCBP1,MD…	-0.696353	0.000493464	0.0137069
response to molecule of bacterial origin(GO:0002237)	249	442	46	16403	0.28	203	41768	0.48	BCL10,NR1H4,FOS,ACP5,SNCA,MAPKAPK2,BDKRB1,CHUK,PRKCE,CDC73,JAK2,EDNRB,ZCCHC11,CMPK2,NFKBIA,APOB,AKIRIN2,DCN,ADAM17,TNFRSF1B,MAPK8,ARG1,ABL1,LY96,PELI1,CCL20,RPS6KB1,FASLG,SERPINA1,MYD88,CPS1,CSF2,AXL,IL10,CD40,CD55,GJB6,CD14,HMGB2,TJP1,CASP8,HNRNPA0,PDE4D,TIMP4,DAB2IP,NFKBIL1	TICAM1,TICAM2,NLRC3,BCL10,TBXA2R,ADH5,C5AR1,NR1H4,NR1H3,SASH1,NR1D1,IL10RA,FOS,TNIP2,NLRP3,GFI1,ACP5,MAOB,GNG12,CSF2RB,HCK,SNCA,NFKB1,PAF1,SCARB1,SGMS1,OPRM1,IL12A,CXCL10,MAPKAPK3,ABCA1,MAPKAPK2,CXCL16,BDKRB1,MTDH,TH,CYP27B1,SOD2,TSPO,IRAK3,CHUK,IRAK2,PRKCA,IRAK1,PRKCE,IRF5,IRF8,IRF3,TCF3,KCNJ8,MTA1,CDC73,JAK2,EDNRA,EDNRB,ZCCHC11,TIRAP,WNT5A,CMPK2,MALT1,MGST1,MEF2C,NFKBIB,NFKBIA,PLSCR4,PLSCR3,TGF…	-0.549898	0.000513045	0.0141899
response to ionizing radiation(GO:0010212)	128	321	19	16430	0.12	109	41862	0.26	XRCC5,XRCC4,XRCC2,ABCG5,MSH2,DCUN1D3,BRE,TP73,HUS1,RFWD2,FAM175A,ATM,TRIM13,TOPBP1,BRCA2,RHOB,SWI5,EGR1,PMAIP1	FANCD2,NET1,NEK1,CLOCK,WRN,MEN1,PTPRC,CXCL10,XRRA1,IFI16,CYBA,SOD2,PRKDC,XRCC5,XRCC4,XRCC2,XRCC6,MTA1,NIPBL,UIMC1,FIGNL1,ABCG5,MSH2,USP28,DCUN1D3,SNAI2,BLM,ERCC8,ERCC6,ERCC1,RAD51AP1,BRE,CCND1,LIG4,TP53,TP73,INO80,RNF8,PAXIP1,GRB2,ITGB1,CLK2,LZIC,STK11,TSPYL5,VCAM1,STAR,MGMT,CDKN1A,HUS1,KAT5,RRM1,PML,RFWD2,RFWD3,DCLRE1C,GADD45A,MAPK14,ECT2,RAD1,NOX4,GPX1,ICAM1,GATA3,FAM175A,SIRT1,INTS3,INTS7,TLK2…	-0.811639	0.00052279	0.0143979
organic anion transport(GO:0015711)	375	889	76	16373	0.46	299	41672	0.71	CACNB4,SLC3A2,NEU1,SLC25A32,SLC25A13,SLC25A15,SLC4A7,SNCA,XK,BDKRB2,TRIAP1,PLA2G6,PLA2R1,SLC5A6,PQLC2,SLC6A12,SLC6A13,ABCG8,ABCC3,ABCC2,ABCC5,SLC17A8,ATP8A2,SNAP25,GRIK1,CA7,CA3,CA2,CA1,APOA2,AQP1,SERINC5,SERINC1,TRPC4,MYO6,ARG1,SLC1A4,SLC1A7,GRM2,HNF1A,TMEM30A,STXBP1,SLC4A10,SCP2,SLC27A2,SLC27A5,SLC27A4,CA13,CA12,SLC38A7,SLC38A6,NPC2,LDLR,NCOR1,PPARD,PPARG,PLIN2,SYT1,GOT2,CPT2,ATP10B,SLC22A4,SLC…	CACNB4,KISS1R,SLC3A2,CFTR,NEU1,ABCB11,SFXN5,SLC16A3,SLC16A2,SLC16A5,SLC16A4,SLC16A7,SLC16A6,SLC25A20,SLC16A1,SLC25A24,SLC25A22,SLC25A26,SLC25A32,SLC25A12,SLC25A11,SLC25A13,SLC25A10,SLC25A15,SLC25A17,SLC25A42,SLC4A8,SLC4A7,SLC4A9,SLC51B,SLC51A,HBB,SNCA,BDNF,ABCC11,SLC15A4,SLC4A2,SLC4A4,SLC4A3,SLC4A5,SCARB1,GLS,ACSL1,ACSL4,ACSL3,ACSL6,ABCA7,ABCA1,XK,BDKRB2,TRIAP1,PLA2G6,PLA2G5,APBA1,SLC22A16,FOLR2,…	-0.435514	0.000531011	0.0145623
response to insulin(GO:0032868)	282	591	54	16395	0.33	228	41743	0.54	FRS2,EPM2AIP1,GCK,GFPT1,AR,GHRHR,PRKCQ,IGFBP1,HADHA,ENPP1,USF1,ATP6V0D1,ATP6V0D2,FOXO1,RPS6,TBC1D4,MZB1,GAB1,ATP6V1C2,CAB39L,ATP6V1G2,ATP6V1G1,ATP6V1E1,ATP6V1E2,CRK,DENND4C,SLC2A8,LPIN1,ACVR1C,PDGFB,SREBF1,RPS6KB1,EIF4G1,FGF9,EEF2K,RAF1,PPARG,PHIP,ANKRD26,IL10,VWA2,RHOQ,NCOA5,INSIG2,FGF20,EGR1,EGR2,PIK3CB,MAX,RAB10,PRKAG1,PIK3R4,PCK1,INSR	GGH,PARP1,FRS2,EPM2AIP1,HDAC5,HDAC9,PAX6,GCK,PPAT,CPEB2,PDPK1,GFPT1,PTPRN,AP3S1,FFAR3,PPM1A,SH2B2,PTPN2,PTPN1,PAK1,BDH1,PTPRE,PTPRA,AR,SORT1,ACSL6,STRADA,STRADB,IDE,GHSR,GHRHR,MTOR,PRKCA,PRKCI,PRKCD,UBE2B,PRKCB,PRKCQ,NGFR,PRKCZ,PRKDC,IGFBP1,HADHA,SOS1,IRS1,ENPP1,PFKFB1,OSBPL8,USF1,MLST8,SOGA1,CAPN10,PKLR,APOE,ATP6V0E2,ATP6V0E1,ATP6V0D1,ATP6V0D2,MYO5A,APRT,ATP6V0A1,ATP6V0A2,FOXO1,FOXO4,RPS6,TBC1D4…	-0.505806	0.000542696	0.0147782
cellular component assembly involved in morphogenesis(GO:0010927)	231	507	42	16407	0.26	189	41782	0.45	HDAC2,CFL2,ILK,NEURL2,BBS4,BBS7,BBS9,RAB3IP,ABLIM1,UGT8,B9D1,ATP6V0D1,TTN,CFLAR,POC1B,FOXJ1,TBC1D7,BMP10,ACTR2,XIRP1,IFT88,NME5,WDR35,TPM1,E2F4,SNX10,WDPCP,IFT172,KIF27,DZIP1,MKKS,TBPL1,AK7,DICER1,ODF2,FOPNL,TMEM17,TTLL5,PCM1,PCNT,MYH11,MYH10	LRRC6,ATG5,ATG3,HDAC2,NEK1,NEBL,CFL2,BBIP1,SCLT1,TTC30B,ILK,SPAG16,NEURL2,TTC8,RSPH1,VANGL2,RSPH9,CELSR3,CELSR2,AGFG1,UBE2B,KLHL41,TTC26,BBS4,BBS5,BBS7,BBS9,TTBK2,PRKAR1A,RAB3IP,BBS1,BBS2,ABLIM1,ABLIM3,DZIP1L,UGT8,TENM4,B9D1,B9D2,MEF2C,MEF2A,CD9,CEP290,KRT19,C11orf63,ATP6V0D1,RPGR,TTN,CFLAR,POC1B,FOXJ1,ERCC2,NFASC,FAM161A,ACTA1,KIAA0586,TBC1D7,ACTC1,BMP10,IFT20,CEP164,TMOD1,ACTR2,IFT74,IFT46,IFT5…	-0.56932	0.00054345	0.0147782
muscle cell differentiation(GO:0042692)	342	593	68	16381	0.41	274	41697	0.65	CACNB4,HDAC2,ACADM,AFG3L2,ZFHX3,NEO1,CFL2,CAMK2D,ILK,WNT8A,NEURL2,XK,CHUK,EDNRB,RBM38,TBX3,TBX5,SETD3,EREG,TRDN,HIF1AN,TTN,IFRD1,CFLAR,BMP10,HEY2,DNER,LGALS1,XIRP1,MYF6,ASF1A,ABL1,IFT88,ASB2,ACVR1,TPM1,IGF1,FBXO40,SDC1,CTNNB1,CTNNA1,CTNNA2,CAPZB,KIAA1161,NFATC4,NFATC3,GATA6,GATA4,AKAP6,MKL2,HOMER1,COL14A1,EZH2,GSK3B,SMARCA4,POPDC2,SPAG9,EPAS1,DICER1,CDON,TANC1,ZEB1,CACYBP,NACA,MYH11,MYH10,CXADR,C…	CACNB4,ATG5,ATG7,HDAC5,HDAC4,HDAC2,HDAC9,ACADM,NEXN,PIAS1,MAML1,AFG3L2,ZFHX3,NEO1,NEBL,CFL2,CAMK2D,HINFP,TBX18,WT1,AXIN1,BVES,CYP26B1,ILK,SORT1,PPP3CA,WNT8A,LMNA,CXCL12,CXCL10,NEURL2,CXCL14,ID3,HIRA,XK,WFIKKN1,BCL9,TMTC3,MTPN,MTOR,CHUK,KLHL40,KLHL41,IGFBP5,MYO18B,TCF3,KCNH1,JAG1,SMARCD3,PRKAR1A,CDC42,PITX2,SMYD3,EDNRB,RBM38,SPEG,RBM24,TBX3,TBX2,TBX5,TBX1,DKK1,SOX6,SOX9,SOX8,SETD3,MEF2C,MEF2A,RORA…	-0.459313	0.000564823	0.015247
negative regulation of MAPK cascade(GO:0043409)	137	305	21	16428	0.13	116	41855	0.28	HDAC3,ITGB1BP1,PTPRJ,MBIP,C3orf33,FOXO1,TP73,ABL1,IGF1,BMP7,SPRY4,SPRY2,NCOR1,ANKRD26,SPRED2,RGS2,GSK3B,APC,DUS2,FLCN,DAB2IP	HDAC3,GBA,VRK3,TNIP1,ITGB1BP1,PTPRJ,PTPRR,PTPN6,PTPN2,PTPN1,MEN1,HYAL2,LMO3,KLF4,MBIP,IRAK3,SORL1,PRKCA,PRKCD,C3orf33,PPP2CA,APOE,FOXO1,ITCH,TBC1D10C,FOXM1,TSC2,INPP5K,RAPGEF1,CSK,MECOM,PPEF2,ZMYND11,TP73,P2RX7,ABL1,ADIPOQ,STK38,UCHL1,PAFAH1B1,RGS14,DUSP10,DUSP18,DUSP19,TAOK3,DUSP22,DUSP26,IGF1,WNK2,AMBP,RPS6KA6,LEMD2,DAG1,PIN1,BMP4,BMP7,ASH1L,AKT1,HIPK3,GSTP1,IGBP1,SPRY4,SPRY2,PPP2R1A,NCOR1,GPS1…	-0.773844	0.000565403	0.015247
single-organism membrane fusion(GO:0044801)	83	187	10	16439	0.06	73	41898	0.17	AFG3L2,SNAP29,TBC1D4,MFN2,STXBP1,STXBP6,SERPINA5,SYT1,BNIP3,STX5	AFG3L2,BET1,OPA1,VAV3,VAT1,DYSF,MUL1,VAMP8,VAMP7,VAMP4,VAMP3,VAMP1,OMA1,VCPIP1,RAB39A,SNAP29,USP30,GRIK5,CD9,IZUMO1,VTI1A,EQTN,STOML2,NKD2,TBC1D4,SNAPIN,USO1,CORO1A,MFN2,MFN1,CLN3,TECPR1,STXBP1,STXBP6,RSG1,FIS1,GNAI3,UVRAG,PID1,AKT2,SERPINA5,NOX5,C2CD5,EEA1,SYT1,SYT4,SYT3,BAK1,LRMP,TIE1,BAX,STX17,STX10,CHCHD3,BNIP3,BNIP1,MFF,RAB7A,RAB8A,RAB20,TMEM27,RAB34,ANKFY1,CAV2,ROPN1B,STX6,STX5,STX4,STX8,TR…	-1.05229	0.000571764	0.0153546
cell-substrate adhesion(GO:0031589)	298	731	58	16391	0.35	240	41731	0.57	FBLN2,FBLN5,ANTXR1,ITGB1BP1,ATXN3,PTPRJ,PTPRK,CYR61,ILK,EPHB3,PRKCE,PPFIBP1,PPFIBP2,MERTK,JAK2,ACER2,MYO1G,SEMA3E,TEK,TRPM7,LGALS1,HOXA7,ARHGAP6,ABL1,PPFIA1,ITGB6,PTK2B,SPOCK1,CDKN2A,COL3A1,CTNNB1,MYADM,CCL21,COL17A1,WDPCP,PXN,RAPH1,TNXB,PPARD,ROCK1,ROCK2,LAMB1,SGCE,HPSE,AXL,GSK3B,PTK2,VWA2,DDR1,COL13A1,DAPK3,PIK3CB,EMILIN1,EPB41L5,RAB1A,TRIOBP,ANGPT1,GCNT2	EGFLAM,PARVG,PARVA,NET1,LYVE1,PDPK1,FBLN2,FBLN5,EMP2,FN1,ANTXR1,ITGB1BP1,ATXN3,PTPRJ,PTPRK,PTPRO,ARHGEF7,ANGPTL3,PIP5K1A,PPM1F,CYR61,NINJ1,BVES,PLET1,ILK,CIB1,VAMP3,TTYH1,MUC4,FREM1,EPHB3,EPHB1,EPHA1,EPHA3,BCL6,PEAK1,BCAM,ZYX,PRKCE,PRKCZ,HRG,DLC1,PPFIBP1,PPFIBP2,NID1,NID2,SEBOX,MERTK,CDC42,JAM3,JAK2,AP1AR,MICALL2,FOXF1,SPP1,TECTA,ACER2,GAS6,EGFL6,MMP14,MYO1G,TBCD,APOD,SEMA3E,WHAMM,BCL2L11,ACTN1,A…	-0.485684	0.000606148	0.0161504
cellular hormone metabolic process(GO:0034754)	79	195	9	16440	0.05	70	41901	0.17	SGPL1,TTR,STARD5,SCP2,BMP5,HSD17B4,DGAT2,UGT2B4,UGT2B7	ADH4,SCPEP1,SGPL1,PLEKHA1,TIPARP,CYP26A1,MED1,SCARB1,CYP26B1,CYP26C1,DHRS9,CYP3A4,BCO2,SRD5A3,SRD5A1,DKK3,ALDH8A1,SULT1A1,TTR,SDR16C5,ESR1,AKR1C3,AKR1C2,AKR1C4,AKR1C1,AKR1D1,AKR1B1,STAR,STARD3,STARD5,RETSAT,STAT5B,RBP4,RBP1,WNT4,COMT,SCP2,STRA6,RDH5,ECE1,PDGFRA,BMP2,BMP5,HSD17B1,HSD17B6,HSD17B3,HSD17B4,HSD17B7,HSD17B8,ALDH1A1,ALDH1A2,ALDH1A3,CYP1A1,HSD17B11,LRAT,ADM,AFP,RDH12,RDH11,RDH10,LHB,REST…	-1.11568	0.00060639	0.0161504
neurotransmitter transport(GO:0006836)	155	393	25	16424	0.15	130	41841	0.31	LRRK2,RAB3GAP1,CAMK2A,SNCA,CADPS2,SLC6A12,SLC6A13,SLC6A4,SLC17A8,SLC6A6,SNAP25,ABAT,GRM4,STXBP1,SYT1,SLC22A3,RIMS2,RIMS1,RAB3B,PCLO,STX7,CACNA1B,SV2B,NRXN3,NRXN1	GFAP,LRRK2,RAB3GAP1,XBP1,CAMK2A,PARK7,PPT1,MAOA,PIP5K1C,SNCG,SNCA,GLS,SNPH,VAMP1,CADPS2,DTNBP1,SLC18A2,SYNJ1,KCNC4,KCNC3,SLC6A11,SLC6A12,SLC6A13,SLC6A14,SLC6A15,SLC6A17,SLC32A1,SLC6A1,SLC6A2,SLC6A3,SLC6A4,SLC17A7,SLC17A8,SLC6A9,SLC17A6,SLC6A7,SLC6A8,SLC6A6,MEF2C,SNAP25,GRIK5,SYDE1,SNAPIN,TOR1A,GAD2,GAD1,ICA1,ABAT,UNC13B,UNC13A,SYT11,P2RX7,SLC1A3,NTRK2,GRM4,PPFIA3,HCRT,ALDH5A1,DOC2A,STXBP1,LIN7B,L…	-0.713526	0.000626046	0.0166056
positive regulation of immune response(GO:0050778)	496	1481	106	16343	0.64	390	41581	0.93	CACNB3,CACNB4,BCL10,ATF2,PAWR,FYN,FOS,PTPRJ,FCER1G,ITPR2,ELF1,C2,MAPKAPK2,PLA2G6,CYFIP2,CHUK,PRKCH,PRKCE,PRKCQ,PRNP,YES1,IRF1,ZBTB1,AP1G1,ITK,C4A,NFKBIA,ELMO2,ELMO1,EREG,TGFB2,MARCO,MYO1G,MYO10,WASL,BLK,KCTD7,TESPA1,PLS1,TEC,TAB1,CFH,CFB,ACTR3,ACTR2,RNF31,CLU,CR2,CRK,MAPK8,MAPK7,ABL1,LY96,WASF2,LGMN,COCH,UBE2V1,PELI2,PELI1,FCGR3A,RC3H1,UBE2D3,UBE2D2,NOD1,RPS6KA1,RPS6KA2,LIMK1,HSP90AA1,C4BPB,C4BPA…	CACNB3,CACNB4,ZAP70,TICAM1,TICAM2,ENAH,NLRC4,BCL10,FADD,ATF1,ATF2,SARM1,PAWR,SLA2,IL6ST,C5AR1,NR1H3,SASH3,PDPK1,NR1D1,FYB,FYN,PHPT1,PLEKHA1,FOS,TNIP2,TNIP1,GFI1,PTPRJ,HFE,NLRX1,PGLYRP2,MAVS,TLR10,VAV3,VAV2,VAV1,XCL1,VASP,SH2B2,HCK,THEMIS2,FCER1G,FCER1A,NFKB1,NFKB2,ITPR3,ITPR1,ITPR2,KLHL6,PAG1,PTPN6,PTPN2,PAK2,PAK1,PTPRC,CRTAM,ELF1,CNPY3,IL12A,C7,C9,C3,C6,C5,C2,MAPKAPK3,MAPKAPK2,IFI16,MB21D1,PLA2G…	-0.368864	0.000636292	0.0167402
inorganic cation transmembrane transport(GO:0098662)	496	1549	106	16343	0.64	390	41581	0.93	SCN3A,ATP6,SCN2A,SCN1A,CACNB1,CACNB2,CACNB3,CACNB4,SLC3A2,SCN9A,SCN7A,SCN5A,WWP2,ATP5A1,SLC25A25,CAMK2D,SLC4A7,ATP5J2,ATP5G2,ATP5G3,ITPR2,SLC30A3,SCARA5,CATSPER2,PLA2G6,FKBP1B,TPCN1,PRKCE,PRNP,KCNK9,KCNJ3,KCNK1,KCNK2,KCNJ4,SCN11A,KCND2,KCNT2,KCNS3,KCNQ5,ATP6AP1L,AHNAK,TRDN,ATP6V0D1,ATP6V0D2,TRPV2,TRPV4,LOXHD1,TRPM7,TRPM1,AQP1,TRPC4,COX6A1,ATP6V1C2,ATP6V1G2,ATP6V1G1,ATP6V1E1,ATP6V1E2,CALM1,NALCN,P…	SCN3A,SCN3B,ATP6,SCN2B,SCN2A,SCN1A,SCN1B,CACNB1,CACNB2,CACNB3,CACNB4,CACNG8,CACNG7,CACNG5,SLC3A2,CACNG4,CACNG2,CACNG1,SCN9A,SCN8A,SCN7A,SCNN1G,SCNN1B,SCN5A,SCNN1A,SCN4B,SCN4A,WWP2,ABCB11,ATP5C1,ATP5A1,SLC25A25,SLC25A37,TESC,CAMK2D,SLC4A7,ATP5J2,ATP5G2,ATP5G3,ATP5F1,ITPR3,ITPR1,ITPR2,SLC4A4,SLC4A5,SLC30A4,SLC30A3,SLC30A6,PTPN3,SCARA5,OPRM1,KCNAB3,KCNAB2,KCNAB1,TMCO3,TTYH1,CATSPER2,CATSPER3,SLC31A2…	-0.368864	0.000636292	0.0167402
vesicle organization(GO:0016050)	163	313	27	16422	0.16	136	41835	0.32	PREB,AP1G1,SAR1A,WASL,TBC1D4,AQP1,SNAP91,SRGN,TM9SF1,ARF1,TMED10,ZFYVE16,SEC23A,SEC31A,STXBP1,STXBP6,COPE,LRSAM1,SYT1,TSG101,BLOC1S2,CLINT1,CUL3,RAB1A,ZEB2,STX5,CHMP4A	AP2S1,BET1,COPB2,COPB1,COPG1,VAV3,AP3B1,AP3D1,DYSF,COPZ1,SORT1,NBEAL2,VAMP8,VAMP7,VAMP4,VAMP3,VAMP1,ARFGAP1,ABCA1,HIP1,PREB,SNX3,PRKCI,KLHL12,DTNBP1,MYO18A,PLEKHF1,AP1G1,SAR1B,SAR1A,SEC13,DLG4,AP1M1,CREB1,RAB39A,GRIK5,WASL,SEC16B,SEC16A,VPS33B,GBF1,VTI1A,FBXO5,SYP,NKD2,TBC1D4,SNAPIN,AQP1,PMEL,USO1,SNAP91,SRGN,TBC1D20,TM9SF1,UNC13A,ARF1,P2RX7,TMED10,CORO1A,ZNF385A,SEC24B,SEC24A,ZFYVE16,SEC24C,SEC2…	-0.681707	0.000643168	0.0168526
cellular ketone metabolic process(GO:0042180)	238	501	44	16405	0.27	194	41777	0.46	ACADM,ACADL,GCK,NR1H4,SNCA,TDO2,PRKCE,PSMA2,PSMA6,PSMA3,PSMA7,PSMB7,PSMC6,PSMD2,PSMD7,PSME1,PSME2,PSME4,FOXO1,VKORC1L1,KYNU,EIF2AK3,AZIN1,SREBF1,CRYZL1,COQ5,COQ4,COQ3,COQ2,SCP2,BMP5,PPARG,TYSND1,SIRT4,GOT2,ANKRD26,PSMB10,ODC1,INSIG2,PSMD14,PDP2,C1QTNF2,CBR3,CBR1	PAX8,ACADM,ACADL,ADH4,GCK,NR1H2,NR1H4,NR1H3,NR1D1,PARK7,ACADVL,NR3C1,SNCA,UBIAD1,PTPN2,TDO2,DHRS9,GHSR,MTOR,PRKCE,HPN,DLAT,CPT1A,IRS1,ABCD2,DKK3,PSMA2,PSMA1,PSMA6,PSMA5,PSMA4,PSMA3,PSMA7,PSMB5,PSMB4,PSMB7,PSMB6,PSMB1,PSMB2,WDR5,PSMB8,PSMC6,PSMC5,PSMC4,PSMC3,PSMC2,PSMC1,PSMD1,PSMD2,PSMD4,PSMD5,PSMD6,PSMD7,PSMD8,PSMD9,PSME1,PSME2,PSME3,PSME4,PSMF1,CYP4F2,VKORC1,SOGA1,FOXO1,APOA4,APOA5,WDTC1,ATCAY,K…	-0.548909	0.000661459	0.0172533
JNK cascade(GO:0007254)	182	417	31	16418	0.19	151	41820	0.36	HDAC3,ARHGEF6,GRIK2,ADORA2B,TAB1,GAB1,ANKRD6,MAPK8,TP73,TPD52L1,PTK2B,TAOK1,SH2D3C,NOD1,CCL21,CCL19,TNXB,MYD88,NCOR1,ZNF622,MLK4,MAP3K7,RIPK1,RPS27A,SPAG9,DVL3,FGF14,ZEB2,CASR,ULK4,DAB2IP	HDAC3,MDFI,SASH1,ARHGEF6,FCER1A,COPS5,AXIN1,MUL1,MEN1,PAK1,STRADB,VANGL2,EPHB1,EPHA4,IRAK4,IRAK2,IRAK1,CDC42,TIRAP,WNT5A,GRIK2,ADORA2B,HACD3,PKN1,MAP3K10,MAP3K13,MAP3K12,MAP3K11,ITCH,ERCC6,SYK,IL1RN,TAB1,TAB2,TAB3,GAB1,ANKRD6,MECOM,MAPK9,MAPK8,PPEF2,ZMYND11,TP73,TPD52L1,PYCARD,PTK2B,PAFAH1B1,STK3,PLCB1,DUSP10,DUSP19,DUSP15,TAOK2,TAOK1,TAOK3,DUSP22,DUSP28,MDFIC,SH2D3C,SH2D3A,EDN1,AMBP,CARD9,TNIK,S…	-0.648296	0.000663795	0.0172533
cell growth(GO:0016049)	418	978	87	16362	0.53	331	41640	0.79	SLC3A2,ADRA1B,ADRA1A,DCLK1,FBLN5,CAMK2D,PTPRJ,MAPT,CYR61,SOCS5,AGTR1,ILK,AR,BDKRB1,PRKCQ,IGFBP1,NDUFA13,TCHP,ENPP1,ROS1,TGFB3,TGFB2,DCUN1D3,BMPR2,TNR,TRPV2,BMP10,ESR2,DCC,ADAM17,SFN,CAPRIN2,ABL1,GDF2,LHX2,RNF6,ADIPOR2,DCSTAMP,SPG20,SERTAD2,NAIF1,PTK2B,EAF2,SPOCK1,CDKN2A,CDKN2D,COBL,CDKN1B,NOP58,PDGFB,CHPT1,FHL1,RPS6KA1,LIMK1,SMAD4,RAPH1,AURKA,PPARD,PPARG,GATA4,AKAP6,SH3BP4,RTN4,CGREF1,NDRG4,ARIH2…	BARHL2,SLC3A2,ARHGEF11,NET1,ADRA1B,ADRA1A,PRMT2,DCLK1,FRZB,ANAPC2,FXN,FBLN5,EMP3,EMP1,FN1,CAMK2D,PTPRJ,PPT1,NUBP1,MAPT,NRCAM,TWF2,BDNF,TAF9B,N6AMT1,CYR61,CCDC85B,DSCAM,SOCS2,SOCS5,WT1,MUL1,PAK4,ENO1,SGMS1,AGTR1,ILK,CD320,F2,HYAL1,HYAL2,AR,PPP3CB,ACSL4,CXCL12,CIB1,CXCL16,CYBA,BDKRB1,CYP27B1,BCL6,APBB2,PLXNA3,PLXNA4,RRAGC,MTPN,MTOR,IGFBP6,PRKCQ,PRKCZ,HRG,HPN,IGFBP1,IGFBP2,IGFBP4,IGFBP5,NDUFA13,TCHP…	-0.402111	0.000695019	0.0179927
membrane fusion(GO:0061025)	112	253	16	16433	0.1	96	41875	0.23	GCA,AFG3L2,DNM1L,SNAP29,HACE1,TBC1D4,MFN2,DCSTAMP,STXBP1,STXBP6,SERPINA5,SYT1,BNIP3,STAP1,RIMS1,STX5	ATG7,GCA,AFG3L2,RABEP1,BET1,OPA1,NPLOC4,VAV3,VAT1,VAPA,DYSF,MUL1,HYAL2,VAMP8,VAMP7,VAMP4,VAMP3,VAMP1,OMA1,CHP1,VCPIP1,RAB39A,DNM1L,GAS6,SNAP29,USP30,GRIK5,HACE1,CD9,VPS33B,IZUMO1,VTI1B,VTI1A,EQTN,STOML2,NKD2,TBC1D4,SNAPIN,USO1,CORO1A,MFN2,MFN1,DCSTAMP,CLN3,TECPR1,STXBP1,STXBP6,RSG1,FIS1,GNAI3,UVRAG,PID1,AKT2,SERPINA5,NOX5,GOSR2,C2CD5,EEA1,SYT1,SYT4,SYT3,BAK1,LRMP,TIE1,BAX,STX17,STX11,STX10,BLOC1S…	-0.856362	0.000699019	0.0180241
cellular carbohydrate metabolic process(GO:0044262)	331	826	66	16383	0.4	265	41706	0.63	EPM2AIP1,ADRA1B,ACADM,UGP2,GCK,MDH1,GFPT1,HK1,SNCA,MAPKAPK5,MAPKAPK2,PPIP5K1,PRKCE,ENPP1,PFKFB3,PFKFB2,GNPTAB,PPP1CB,ACER2,GBE1,PLEK,FOXO1,HKDC1,CALM1,MAPK8,MAPK7,IER3,PCDH12,PTK2B,XYLB,IDNK,POMC,DUSP12,IGF1,HIF1A,HAS3,TP53RK,COQ3,COQ2,RPS6KA1,RPS6KA2,ALG1,LIMK1,NCOR1,GPD2,RBKS,CPS1,GSK3B,RPS27A,CERCAM,KHK,RIOK3,NCOA2,DAPK3,PHKG1,IKBKB,PMAIP1,ULK1,ULK2,PRKAG1,DGAT2,PCK1,INSR,DYRK2,C1QTNF2,TINF2	PPP1CA,NUAK2,NUAK1,GK5,MANBA,PASK,EPM2AIP1,ISYNA1,HDAC4,ADRA1B,ACADM,GAA,UGP2,GCK,IL6ST,MDH2,MDH1,NR1D1,GFPT1,CSGALNACT1,CSGALNACT2,HK2,HK1,UEVLD,HK3,MAS1,ACLY,SLC51B,ANGPTL3,NR3C1,GYG2,GYG1,IPPK,SNCA,GYS1,GYS2,GNE,PTPN2,MELK,PGAM1,MYLK4,GK,CS,MAPKAPK5,MAPKAPK3,MAPKAPK2,G6PC,MOGAT3,MOGAT1,CHP1,MTOR,SLC5A3,PPIP5K2,PPIP5K1,PRKCE,PRKD2,PRKD3,IGFBP4,IGFBP5,SYNJ1,SORD,IMPAD1,RNASEL,IRS1,ENPP1,PFKFB4,P…	-0.455674	0.000723378	0.0185782
negative regulation of cytokine production(GO:0001818)	135	355	21	16428	0.13	114	41857	0.27	ACP5,PPM1B,MC1R,PRNP,TGFB3,TGFB2,NDFIP1,ADAM17,POMC,C10orf54,UBE2D3,CHRNA7,GATA6,AXL,IL10,RPS27A,RGCC,CDH3,TAX1BP1,IFIH1,NFKBIL1	TICAM2,NLRC5,ATG5,HDAC7,GBA,C5AR2,NLRP3,ACP5,NLRX1,PGLYRP2,MAVS,XCL1,PPM1B,NFKB1,MEFV,MUL1,MC1R,IL12A,GHSR,KLF4,ATG12,BCL6,TSPO,IRAK3,PRNP,IRF3,DLL1,HMOX1,JAK3,CD2AP,CYLD,TBK1,WNT11,GAS6,TGFB3,TGFB1,TGFB2,ARRB2,ARRB1,APOD,NDFIP1,ITCH,BPI,UBA7,IL23A,ADAM17,CSK,TNFRSF1A,ISG15,ADIPOQ,PYCARD,OTUD7B,IDO1,VSIG4,POMC,C10orf54,PELI3,IL1RL1,CIDEA,UBE2D3,KAT5,PCBP2,SLC37A4,NOD2,HSF1,RPS6KA4,CHRNA7,PIN1,TUS…	-0.756404	0.000747494	0.0191217
skeletal system morphogenesis(GO:0048705)	177	317	30	16419	0.18	147	41824	0.35	SGPL1,BMPR1B,ACP5,HHIP,MMP16,TGFB3,TGFB2,TEK,HOXA1,HOXA2,HOXA5,HOXA7,MYCN,TFAP2A,WDR48,CSRNP1,ACVR2B,COMP,CTNNB1,BMP7,OSR1,COL13A1,INSIG2,ASXL2,MGP,ZEB1,GLI3,NAB1,CARM1,TULP3	WWOX,SGPL1,MDFI,PLEKHA1,TIPARP,CSGALNACT1,BMPR1B,ACP5,TBX15,PHOSPHO1,DSCAML1,AXIN2,AXIN1,MEN1,CYP26B1,HYAL1,HYAL2,WNT9A,PRKRA,FREM1,IMPAD1,CHAD,NIPBL,DLG1,IRX5,MSX2,HHIP,COL11A2,COL11A1,TBX4,TBX1,SOX9,SETD2,MEF2C,MMP16,MMP14,MEF2D,TGFB3,TGFB1,TGFB2,CHST11,TGFBR1,TGFBR2,GRHL2,TEK,ARID5B,SKI,HOXA1,HOXA2,HOXA5,HOXA7,HOXB3,HOXB2,HOXB5,HOXB6,PRRX1,SMO,MYCN,TFAP2A,P2RX7,IFT80,SPEF2,WDR48,CHSY1,WDR19,ID…	-0.654204	0.000756315	0.0192711
chemokine production(GO:0032602)	50	119	4	16445	0.02	46	41925	0.11	ADORA2B,ADAM17,HIF1A,MYD88	TICAM1,TICAM2,FFAR3,MAVS,MEFV,MUL1,C5,KLF4,HMOX1,TIRAP,WNT5A,ADORA2B,APOD,SIGIRR,SNAI2,CSF1R,ADAM17,MAPK9,ADIPOQ,PYCARD,DDX3X,EIF2AK2,HIF1A,ZFPM1,IL1RL1,SLC37A4,NOD2,S100A9,TUSC2,GSTP1,MYD88,TLR2,TLR4,TLR7,IL4R,IL6R,IL18,IL1B,IL33,CD74,CXCR3,MAP2K5,LBP,TWIST1,RIPK2,C1QTNF3	-1.50649	0.0007661	0.0194439
ribonucleoprotein complex biogenesis(GO:0022613)	334	751	67	16382	0.41	267	41704	0.64	RPLP0,PRMT7,SLU7,LAS1L,RPL26,PAN3,YTHDC1,DIS3,SCAF11,CHD7,MPHOSPH10,NIP7,MTIF2,MTIF3,RPSA,RPS6,CNOT2,CNOT1,RPL7,SNRPC,SNRPF,NLE1,SRSF9,FCF1,EIF3E,EIF3L,GEMIN6,GEMIN5,GEMIN2,ZNHIT6,WDR55,WDR12,DDX23,DDX47,DDX56,DDX51,SFSWAP,FRG1,UTP20,UTP18,CDKN2A,MRTO4,NOP58,NOP56,GNL1,RC3H1,RRP8,WBP11,DDX39B,RAN,PHAX,PDCD11,RPL35A,BICD1,DDX1,CRNKL1,EXOSC8,EXOSC2,PUM2,DICER1,SRSF12,NOC4L,PRPF31,TGS1,LUC7L3,DCAF13…	SART3,SART1,RPLP0,POP4,PRMT7,PRMT5,SNRNP200,SLU7,LAS1L,ATXN2,RPL14,RPL11,SMN1,RPL26,ZRSR2,NUDT16,PAN3,YTHDC1,UTP14A,UTP14C,ADAR,TFB2M,TFB1M,FTSJ3,DROSHA,DIS3,SCAF11,DKC1,MTG1,GTPBP4,TSR3,TSR1,TSR2,PATL1,PATL2,EMG1,RNASEL,CHD7,NHP2,CD2BP2,CNOT6L,TBL3,ISG20L2,GAR1,ERI1,USP39,TXNL4A,SNRPD3,SNRPD1,MPHOSPH10,BYSL,RPF1,GNL3L,NIP7,C1D,SURF6,MTIF2,MTIF3,RPSA,RPS6,RPS8,RPS7,CNOT2,CNOT1,CNOT7,CNOT6,RPL7,RP…	-0.448142	0.00077114	0.0194954
positive regulation of lymphocyte activation(GO:0051251)	224	581	41	16408	0.25	183	41788	0.44	BCL10,FYN,SOCS5,IL7,PRKCQ,YES1,PDCD1LG2,ZBTB1,AP1G1,CD276,CD274,VNN1,IL15RA,IL2RA,TESPA1,LGALS1,DPP4,IGF1,PELI1,GPR183,CCL21,CCL19,MAPKAP1,PPP2R3C,MYD88,HSPH1,HLA-DRB3,HLA-DRB4,HLA-DRB5,HPS1,AIF1,MAP3K7,HLA-DRA,ZNF335,AXL,IL15,HLA-A,CD40,CD55,GLI2,GLI3	SART1,ZAP70,TICAM1,BCL10,FADD,IL6ST,SASH3,PDPK1,FYN,TNIP2,HLX,VAV3,VAV1,XCL1,TBX21,AP3B1,AP3D1,ITPKB,SOCS5,PTPN6,PAK2,PAK1,PTPRC,IL12A,IL7,TNFSF9,BCL6,MTOR,PRKCQ,PRKCZ,YES1,IGFBP2,PDCD1LG2,TCF3,ZBTB1,AP1G1,CDC42,TIRAP,CD276,MALT1,CD274,CD247,MEF2C,BTK,VNN1,GAS6,TGFB1,IL15RA,MLST8,IL12RB1,ICOS,CD4,CD5,MAP3K14,BLM,IL2RA,TESPA1,SYK,IL23A,TGFBR2,NKAP,WHSC1,CLCF1,INPP5D,LGALS1,LGALS8,SPN,SRC,CSK,IL13R…	-0.561074	0.000775639	0.0195328
regulation of JNK cascade(GO:0046328)	144	317	23	16426	0.14	121	41850	0.29	HDAC3,GRIK2,GAB1,ANKRD6,TP73,TPD52L1,PTK2B,TAOK1,NOD1,CCL21,CCL19,TNXB,MYD88,NCOR1,ZNF622,MLK4,MAP3K7,RIPK1,SPAG9,DVL3,ZEB2,ULK4,DAB2IP	HDAC3,MDFI,SASH1,FCER1A,COPS5,AXIN1,MUL1,MEN1,PAK1,VANGL2,EPHB1,EPHA4,CDC42,TIRAP,WNT5A,GRIK2,HACD3,PKN1,MAP3K10,MAP3K11,ITCH,ERCC6,SYK,IL1RN,GAB1,ANKRD6,MECOM,MAPK9,PPEF2,ZMYND11,TP73,TPD52L1,PYCARD,PTK2B,PAFAH1B1,STK3,PLCB1,DUSP10,DUSP19,DUSP15,TAOK2,TAOK1,TAOK3,DUSP22,MDFIC,EDN1,AMBP,CARD9,TNIK,SH3RF1,NOD2,NOD1,CCL21,CCL19,DAB2,TRAF2,TRAF6,TRAF4,GADD45G,GADD45B,GADD45A,AKT1,MINK1,HIPK3,HIPK2,G…	-0.72507	0.000785944	0.0197156
cellular divalent inorganic cation homeostasis(GO:0072503)	301	728	59	16390	0.36	242	41729	0.58	CACNB4,NEU1,ADRA1A,GCK,CAMK2D,SNCA,SLC30A2,SLC30A3,AGTR1,RIC3,XK,BDKRB1,BDKRB2,PLA2G6,FKBP1B,PRKCE,JAK2,EDNRB,EPHX2,GRIK2,TRDN,IBTK,TRPV4,TRPM7,TRPM1,INPP4B,CALM1,SRI,ABL1,DIAPH1,PTK2B,TPT1,ATP7B,GNG3,CCL21,CCL19,GPR12,CHRNA7,GTF2I,GSTO1,NPTN,SLC24A2,AKAP6,CD40,CD55,JPH3,GJA1,JPH1,CXCR4,CUL5,PIK3CB,RYR2,LPAR2,ATP2A1,CASR,PDE4D,CACNA1C,RAP1GDS1,ERO1A	CACNB4,ATG5,NEU1,TBXA2R,ADRA1A,GCK,C5AR1,PDPK1,SLC25A23,SLC25A27,CAMK2D,SYPL2,XCL1,VAPB,SNCA,AP3D1,ITPR3,ITPR1,WFS1,SLC30A4,SLC30A2,SLC30A3,SLC30A7,PTPN6,PTPRC,AGTR1,CCR10,F2,RIC3,OPRM1,C5,OPRL1,CXCL11,CXCL12,CXCL10,PVALB,CYBA,XK,BDKRB1,BDKRB2,PLA2G6,FKBP1A,FKBP1B,TPCN2,PRKCA,PRKCE,PRKCB,ADCYAP1,KCNA5,MICU1,HERPUD1,DLG4,JAK2,EDNRA,EDNRB,EPHX2,BBC3,GRIK2,TGFB1,GRIN1,GRINA,TRDN,APOE,STOML2,IBTK,TRP…	-0.476875	0.00080227	0.0199703
hexose biosynthetic process(GO:0019319)	82	196	10	16439	0.06	72	41899	0.17	ACADM,GCK,MDH1,SLC25A13,FOXO1,PMM2,GPD2,GOT2,PCK2,PCK1	ATF3,ACADM,GCK,MDH2,MDH1,NR1D1,SLC25A12,SLC25A11,SLC25A13,SLC25A10,NR3C1,PTPN2,ENO2,ENO3,ENO1,GPI,PGAM1,PGAM2,CRTC2,PC,G6PC,SORD,PFKFB1,WDR5,SOGA1,CHST15,FOXO1,FAM132A,CMC2,CMC1,PMM2,PMM1,ADIPOQ,CLK2,FBP1,FBP2,STK11,TPI1,GAPDHS,OGT,G6PC3,ALDOA,RBP4,ALDOC,ALDOB,LEPR,PPARA,RANBP2,GPD2,GPD1,GOT2,GOT1,PGM1,SLC25A1,PGK1,TCF7L2,KAT2A,KAT2B,SIK1,PER2,SESN2,CRY1,PDK2,SLC35B4,PPARGC1A,PRKACA,PRKACB,GAPDH,…	-1.03848	0.000799298	0.0199703
regulation of lymphocyte activation(GO:0051249)	325	771	65	16384	0.4	260	41711	0.62	BCL10,PAWR,FYN,SOCS5,IL7,ID2,PRKCQ,PRNP,YES1,IRF1,PDCD1LG2,ZBTB1,AP1G1,MERTK,CD276,CD274,VNN1,IL15RA,APLF,NDFIP1,FOXJ1,IL2RA,TESPA1,MZB1,LGALS1,DPP4,C10orf54,IGF1,CDKN2A,PELI1,GPR183,RC3H1,CTNNB1,CCL21,CCL19,MAPKAP1,PPP2R3C,MYD88,HSPH1,HLA-DRB3,HLA-DRB4,HLA-DRB5,HPS1,AIF1,MAP3K7,HLA-DRA,ATM,ZNF335,THOC1,AXL,IL15,IL10,HLA-A,CD40,CD55,FLT3,RIPK3,LST1,INHBA,CASP3,SAMSN1,ZEB1,GLI2,GLI3,PDE5A	SART1,ZAP70,TICAM1,BCL10,FADD,PAWR,SLA2,IL6ST,SASH3,PDPK1,FYN,TNIP2,HLX,PGLYRP2,VAV3,VAV1,XCL1,TBX21,AP3B1,AP3D1,ITPKB,PAG1,SOCS6,SOCS5,PTPN6,PTPN2,PAK2,PAK1,PTPRC,IL12A,IL7,TNFSF9,ID2,BCL6,SOD1,ZC3H8,MTOR,PRKCQ,PRNP,PRKCZ,YES1,IRF1,IRF4,IGFBP2,PDCD1LG2,TCF3,CD209,ZBTB1,AP1G1,MERTK,CDC42,DLG1,JAK3,SLC46A2,CYLD,TIRAP,CD276,MALT1,CD274,CD247,MEF2C,RORC,BTK,VNN1,NFKBID,GAS6,TGFB1,IL15RA,MLST8,IL12RB…	-0.451835	0.000819136	0.0203121
protein secretion(GO:0009306)	197	500	35	16414	0.21	162	41809	0.39	EEPD1,STEAP3,PPIA,EXPH5,STXBP5L,GNPTAB,CD276,CD274,DNM1L,TGFB3,TGFB2,PLEK,KCTD7,APOA2,TEK,SRGN,ABL1,BTN3A2,IFNAR1,LTBP2,CCL19,PDIA4,HPS1,TRIM16,IL10,TRAF3IP2,CD40,RGCC,CD14,RAB1A,RHBDF2,ERP29,P3H1,ANGPT1,ANXA4	NLRC4,ATG5,C5AR2,EEPD1,NR1H2,NR1H3,STEAP3,MON1A,PPIA,PPID,NLRP3,NLRP1,FFAR4,EXPH5,ACHE,TLR10,STXBP5L,SNCG,CRTAM,GOLPH3L,OPRM1,HYAL2,ARL4D,C5,CXCL10,ARFGAP3,ABCA1,PRKCZ,LMF1,IRF3,MYO18A,GNPTAB,WNT5A,CD276,CD274,DNM1L,GAS6,NECAB3,TGFB3,TGFB1,TGFB2,CLEC9A,CD2,CHI3L1,PLEK,CSF1R,KCTD7,POU2F2,SYK,SYTL4,APOA2,TEK,CLEC6A,ANKRD1,SRC,SRGN,CRP,TNFRSF21,P2RX7,ABL1,ABL2,BTN2A2,BTN3A1,BTN3A2,CBLN4,CBLN1,PYCARD…	-0.597271	0.000830145	0.0205065
detection of stimulus(GO:0051606)	188	1152	33	16416	0.2	155	41816	0.37	CACNB4,GCK,GJA10,FYN,PRKCQ,ELOVL4,ATP8A2,TGFB3,FNTB,APOB,TTN,TTR,TUB,APOA2,LOXHD1,OR7D4,CALM1,PKD2L1,PKD2L2,LY96,ENG,SDC1,MRPS35,NOD1,LDLR,MKKS,SYT1,JUP,LRP8,HLA-A,HLA-B,RYR2,CASR	CACNB4,PARP1,NLRC4,OR1N2,GCK,GJA10,PIEZO1,PIEZO2,FYN,PLEKHB1,NLRP3,FFAR4,PGLYRP2,NR2F6,SCARB1,CRTAM,EPHB1,TAS1R3,SOD2,PRKCA,PRKCQ,NGFR,HPN,ELOVL4,CYB5R4,ADORA1,OR1D2,ABCG1,COL11A1,ATP8A2,FOXF1,MMP24,TGFB3,FNTB,FNTA,ARRB2,ARRB1,APOB,APOE,TTN,TTR,TUB,FECH,APOA4,APOA2,SDR16C5,LOXHD1,TRPM3,TRPM8,OR7D4,TRPC3,CALM1,PKD2L1,PKD2L2,SMO,UNC119,PPEF2,PPEF1,STIM1,PNKP,LY96,ITGA2,PITPNM1,PCDH15,HTR2A,ASPH,AKR…	-0.611895	0.000840962	0.0205447
organelle fusion(GO:0048284)	76	150	9	16440	0.05	67	41904	0.16	AFG3L2,SNAP29,TBC1D4,MFN2,STXBP1,STXBP6,SYT1,BNIP3,STX5	AFG3L2,BET1,OPA1,VAV3,VAT1,DYSF,MUL1,CYP26C1,VAMP8,VAMP7,VAMP4,VAMP3,VAMP1,OMA1,VCPIP1,RAB39A,SNAP29,USP30,GRIK5,VTI1A,STOML2,NKD2,TBC1D4,SNAPIN,USO1,CORO1A,MFN2,MFN1,CLN3,TECPR1,STXBP1,STXBP6,RSG1,FIS1,GNAI3,UVRAG,PID1,AKT2,C2CD5,EEA1,SYT1,SYT4,SYT3,BAK1,LRMP,BAX,STX17,STX10,CDK1,CHCHD3,BNIP3,BNIP1,MFF,RAB7A,RAB8A,RAB20,TMEM27,RAB34,ANKFY1,CAV2,STX6,STX5,STX4,STX8,TRIM9,ANXA1,ANXA2	-1.0718	0.000840001	0.0205447
gluconeogenesis(GO:0006094)	77	178	9	16440	0.05	68	41903	0.16	ACADM,GCK,MDH1,SLC25A13,FOXO1,GPD2,GOT2,PCK2,PCK1	ATF3,ACADM,GCK,MDH2,MDH1,NR1D1,SLC25A12,SLC25A11,SLC25A13,SLC25A10,NR3C1,PTPN2,ENO2,ENO3,ENO1,GPI,PGAM1,PGAM2,CRTC2,PC,G6PC,PFKFB1,WDR5,SOGA1,FOXO1,FAM132A,CMC2,CMC1,ADIPOQ,CLK2,FBP1,FBP2,STK11,TPI1,GAPDHS,OGT,G6PC3,ALDOA,RBP4,ALDOC,ALDOB,LEPR,PPARA,RANBP2,GPD2,GPD1,GOT2,GOT1,PGM1,SLC25A1,PGK1,TCF7L2,KAT2A,KAT2B,SIK1,PER2,SESN2,CRY1,PDK2,SLC35B4,PPARGC1A,PRKACA,PRKACB,GAPDH,PCK2,PCK1,ARPP19,C1QTN…	-1.08664	0.000841214	0.0205447
regulation of mitotic cell cycle(GO:0007346)	420	1039	88	16361	0.53	332	41639	0.79	ATF2,HDAC3,ANAPC1,ANAPC4,NEK6,MDC1,XPC,CAMK2D,ID2,TRIAP1,MBD4,TOM1L2,XRCC3,CDC73,CDC23,RBM38,PSMA2,PSMA6,PSMA3,PSMA7,PSMB7,PSMC6,PSMD2,PSMD7,PSME1,PSME2,BTG3,PSME4,MSH2,VPS4A,EREG,USP22,FOXA1,BID,CCNA1,RPS6,NLE1,TP73,ABL1,IER3,KANK2,ASNS,ASUN,IGF1,CDKN2A,CDKN2B,CDKN1B,HUS1,PDGFB,ZNF830,FHL1,RPS6KB1,RFWD2,BMP7,ANAPC10,CENPE,AURKA,AFAP1L2,PHIP,LSM11,ANLN,CHEK1,PSMB10,AIF1,ATM,EZH2,RPS27L,RPS27A,RNA…	PARP3,ATF2,HDAC3,PRMT2,PRMT5,CUL4A,CUL4B,ANAPC1,ANAPC2,ANAPC5,ANAPC4,ANAPC7,NEK6,NEK7,MDC1,ZW10,XPC,MDM2,CAMK2D,MEPCE,MAP9,SH2B1,SMC5,MAEA,PTPN6,PTPN3,BUB1B,PCID2,ZWINT,WNT9A,KNTC1,PRCC,MUC1,PLRG1,NEK11,ID2,TRIAP1,MTBP,NSMCE2,MBD4,TOM1L1,TOM1L2,KLHL22,PRKCA,UBE2C,PRKDC,L3MBTL1,XRCC3,TCF3,TTC28,BUB1,BUB3,MTA3,KCNA5,CDC42,DLG1,CHFR,CDC73,CDC16,CDC23,CDC20,CDC26,CDC27,RBM38,CYLD,PSMA2,PSMA1,PSMA6,PS…	-0.393661	0.000872194	0.0209068
positive regulation of MAPK cascade(GO:0043410)	378	843	78	16371	0.47	300	41671	0.71	FRS2,LRRK2,ADRA1B,ADRA1A,CAMK2D,XDH,WWC1,ILK,AR,MAPKAPK5,MAPKAPK2,NEK10,PRKCE,MID1,TGFB3,TGFB2,ADORA2B,FBXW7,BMPER,TEK,DCC,TAB1,GAB1,RAPGEF2,ANKRD6,ST5,TP73,ABL1,TPD52L1,GRM4,PTK2B,TAOK1,IGF1,PELI2,GPR183,PDGFB,CTNNB1,GNG3,NOD1,CCL21,CCL19,GPR37,KITLG,CHRNA7,PXN,FGF9,SPRY2,MYD88,ERBB4,ZNF622,PDCD10,MLK4,MAP3K7,EZH2,RIPK1,RPS27A,CD40,CXCR4,CDK10,SPAG9,DVL3,MAP2K3,FLT1,FLT3,CDON,FGF20,PIK3CB,CYSLTR…	GHR,FRS2,LRRK2,ADRA1B,ADRA1A,C5AR2,C5AR1,MDFI,SASH1,NENF,CAMK2D,MST1R,HGF,FFAR4,XDH,WWC1,FCER1A,MADD,AXIN1,MUL1,PAK3,PAK1,PTPRC,ILK,OPRM1,AR,C5,CIB1,ABCA7,MAPKAPK5,MAPKAPK3,MAPKAPK2,NEK10,VANGL2,EPHA4,EPHA8,SOD1,IRAK2,PRKCA,IRAK1,PRKCE,PRKD2,PRKCZ,IGFBP4,MAGED1,ADCYAP1,CDC42,ADRB2,PSAP,EDNRA,TBX1,TENM1,TIRAP,WNT5A,MEF2C,GAS6,SCIMP,MID1,TGFB3,TGFB1,TGFB2,ARRB2,ARRB1,ADORA2B,HACD3,FBXW7,PKN1,SEMA7A…	-0.41278	0.000864055	0.0209068
positive regulation of defense response(GO:0031349)	270	785	52	16397	0.32	218	41753	0.52	BCL10,ATF2,FOS,FCER1G,AGTR1,MAPKAPK2,CHUK,PRKCE,IRF1,AP1G1,JAK2,NFKBIA,EREG,MARCO,ADORA2B,PLS1,TAB1,MAPK8,MAPK7,LY96,LGMN,COCH,UBE2V1,PELI2,PELI1,UBE2D3,UBE2D2,NOD1,RPS6KA1,RPS6KA2,MYD88,GPRC5B,COLEC12,SH2D1B,MAP3K7,RIPK1,IL15,RPS27A,GJA1,CD14,MAP2K3,POLR3F,RIPK3,IFIH1,NCR3,IKBKB,CASP8,TMEM173,PIK3R4,DAB2IP,NFKBIL1,CTSB	TICAM1,TICAM2,NLRC4,BCL10,FADD,ATF1,ATF2,SARM1,IL6ST,NR1H3,PDPK1,NR1D1,FOS,TNIP2,TNIP1,GFI1,CLOCK,FFAR3,NLRX1,PGLYRP2,MAVS,TLR10,HCK,FCER1G,FCER1A,NFKB1,NFKB2,AGTR1,CRTAM,HYAL2,CNPY3,IL12A,C3,MAPKAPK3,MAPKAPK2,IFI16,MB21D1,PLA2G7,BIRC3,BIRC2,IRAK4,IRAK3,CHUK,IRAK2,PRKCA,IRAK1,PRKCE,UBE2N,IRF7,IRF1,IRF3,IRF4,CD226,AP1G1,CREB1,JAK2,ADORA3,EDNRA,CYLD,TBK1,TIRAP,WNT5A,UNC93B1,ELK1,MEF2C,MEF2A,BTK,NFK…	-0.498578	0.00086437	0.0209068
regulation of immune effector process(GO:0002697)	249	761	47	16402	0.29	202	41769	0.48	BCL10,AP2M1,FYN,PPM1B,FCER1G,SOCS5,C2,ZBTB1,AP1G1,AP1M2,C4A,ELMO1,TGFB3,TGFB2,ADORA2B,APLF,NDFIP1,KCTD7,FOXJ1,IL2RA,APOA2,TEK,MZB1,CFH,CFB,ARF1,C10orf54,RC3H1,CCL19,ELMOD2,C4BPB,C4BPA,GPRC5B,SH2D1B,MAP3K7,THOC1,IL15,IL10,HLA-A,HLA-B,HLA-F,CD40,CD55,RIPK3,NCR3,TMEM173,ANGPT1	AP2S1,ATG5,BCL10,FADD,AP2M1,SASH3,PDPK1,AP2A2,AP2A1,FYN,HFE,HLX,FFAR3,NLRX1,PGLYRP2,MAVS,XCL1,PPM1B,TSPAN32,HCK,FCER1G,FCER1A,TBX21,SOCS5,PTPN6,MUL1,PAK2,PTPRC,CRTAM,IL12A,C7,C9,C3,C6,C5,PPP3CB,C2,MB21D1,BCL6,BIRC3,BIRC2,IRAK3,PRKCZ,HPX,IRF3,IRF4,CD226,AP1S3,AP1S1,AP1S2,ZBTB1,AP1G1,SEBOX,HMOX1,AP1M1,AP1M2,CREB3,JAK3,ADORA3,AP1B1,WNT5A,MALT1,CD247,BTK,FOXF1,C4A,ELMO1,C8A,C8B,TGFB3,TGFB1,TGFB2,ARRB…	-0.523369	0.000870061	0.0209068
positive regulation of inflammatory response(GO:0050729)	61	173	6	16443	0.04	55	41916	0.13	FCER1G,AGTR1,JAK2,ADORA2B,GPRC5B,IL15	IL6ST,TNIP1,CLOCK,FFAR3,TLR10,FCER1G,FCER1A,AGTR1,HYAL2,C3,PLA2G7,PRKCA,JAK2,ADORA3,EDNRA,WNT5A,ADORA2B,IL23A,TNFRSF1A,ITGA2,IDO1,STAT5A,STAT5B,IL1RL1,OSM,PTGS2,S100A9,MAPK13,CNR1,SERPINE1,GPRC5B,RPS19,TLR2,TLR4,TLR7,OSMR,IL18,IL15,IL1B,IL33,CCR2,AGT,NPY5R,EGFR,CX3CL1,LBP,PIK3CG,FABP4,PTGER3,PTGER4,TGM2,ADAM8,PDE2A,S100A12,CTSS	-1.27981	0.00087128	0.0209068
protein localization to membrane(GO:0072657)	435	1056	92	16357	0.56	343	41628	0.82	RPLP0,CACNB1,AP2M1,RAB3GAP1,SPTBN1,ITGB1BP1,RPL18,RPL19,RPL12,RPL35,RPL36,RPL39,RPL32,RPL34,RPL26,RPL23,RPL21,TSPAN15,FCER1G,AR,PPP3CC,PICK1,SYNE3,NDUFA13,RAB3IP,FLOT1,MICALL1,GRIK2,BID,KCTD7,SPCS3,RPSA,RPS6,RPS5,RPL7,RPL6,RPL3,RPS2,SFN,TM9SF1,RAMP3,MAPK8,IFT122,DENND4C,PEX26,GOLGA4,PPFIA1,CLTC,ZFYVE27,LYPLAL1,PACSIN1,SCP2,MYADM,SRP68,SRP54,TOMM22,HSP90AA1,MOAP1,CENPE,RAE1,KIF5B,SRP19,YWHAQ,RPS10…	SCN3B,RPLP2,RPLP0,RPLP1,LRRC4,CACNB1,ARHGEF16,AP2M1,ATG3,RAB3GAP2,RAB3GAP1,PDPK1,PARD3,LYPLA1,SEC61B,TESC,SPTBN4,SPTBN1,ITGB1BP1,RPL18,RPL17,RPL19,RPL14,RPL15,RPL10,RPL11,RPL12,HGS,MAP7,RPL3L,RPL35,RPL36,RPL37,RPL39,RPL30,RPL32,RPL31,RPL34,RPL26,RPL27,RPL24,RPL28,RPL29,RPL23,RPL22,RPL21,SLC51B,PIP5K1A,ATG4C,TSPAN33,TSPAN14,TSPAN15,GET4,PALM,FCER1G,AP3D1,WRB,PAK1,SH3PXD2B,AR,PKDCC,LRRTM4,PPP3CC,AC…	-0.381825	0.000895597	0.0213886
positive regulation of protein serine/threonine kinase activity(GO:0071902)	261	580	50	16399	0.3	211	41760	0.5	FRS2,LRRK2,MAPRE3,SNCA,ILK,MAPKAPK5,MAPKAPK2,NEK10,TGFB3,ADORA2B,TAB1,GAB1,RAPGEF2,ADAM17,CALM1,SPDYA,TP73,TPD52L1,GRM4,PTK2B,PDGFB,GNG3,NOD1,CCL19,KITLG,CHRNA7,PXN,SPRY2,HSPA2,PDCD10,MLK4,MAP3K7,EZH2,RIPK1,RPS27A,CD40,RGCC,CXCR4,SPAG9,DVL3,MAP2K3,FLT1,FLT3,PIK3CB,LPAR2,ZEB2,INSR,PDE5A,C1QTNF2,DAB2IP	GHR,FRS2,LRRK2,MAPRE3,C5AR1,MDFI,SASH1,MST1R,HGF,MAS1,SNCA,FCER1A,COPS8,MADD,AXIN1,MUL1,PAK3,PAK1,PTPRC,ILK,C5,ACSL1,CIB1,MAPKAPK5,MAPKAPK3,MAPKAPK2,NEK10,VANGL2,EPHA4,SOD1,IRAK2,IRAK1,MAGED1,PPP2CA,TENM1,WNT5A,MALT1,MEF2C,TGFB3,TGFB1,ADORA2B,HACD3,PKN1,CAMK1,CHI3L1,MAP3K10,MAP3K11,CSF1R,ERCC6,SYK,IL1RN,CCND1,CCND3,CCND2,TAB1,TAB2,TAB3,S1PR2,GAB1,RAPGEF2,ADAM17,CALM1,SRC,CSK,SPDYA,PROX1,MAPK1,MAP…	-0.505117	0.000906623	0.0215723
peptide metabolic process(GO:0006518)	97	279	13	16436	0.08	84	41887	0.2	BDH2,LRRTM3,GGCT,SPCS3,CLU,CPQ,GLRX2,TMED10,CLN5,TPP1,GSTA4,CPN1,MME	PGLYRP2,GSS,GSR,HAGHL,BDH2,LRRTM3,IDE,ABCA7,G6PD,SOD1,SOD2,SORL1,GGCT,GGT5,GGT7,MGST1,MGST2,SEC11C,SEC11A,APEH,APOE,IDH1,SPCS3,SPCS1,SPCS2,CLU,CPQ,GLRX2,UNC13A,NCSTN,PNKD,DMD,TMED10,CLN5,GCLC,GSAP,GCLM,TPP1,ALDH5A1,GSTA1,GSTA2,GSTA4,GSTA5,MMP7,TAPBP,MRPS26,NOD2,PAM,ECE1,ADAMTS13,GSTZ1,GSTM5,GSTM1,GSTM3,GSTM4,GSTK1,GSTP1,BACE1,FURIN,OLFM1,GPX1,GPX4,LTA4H,HAGH,CARNS1,BECN1,PSEN1,PSEN2,CPN1,THOP1,AC…	-0.930366	0.000925998	0.0218725
endocrine system development(GO:0035270)	97	241	13	16436	0.08	84	41887	0.2	GCK,GHRHR,FOXO1,HOXA5,HNF1A,NKX2-2,EIF2AK3,BMP5,ETS1,GATA6,GSK3B,CDH1,GLI2	PAX6,PAX8,GCK,SIDT2,PDPK1,BMPR1A,CLOCK,NR3C1,NEUROD1,ARNTL,WT1,TSPO,GHRHR,ADCYAP1,NR5A2,HHEX,CREB1,PITX2,TBX1,DKK3,SLC6A3,WNT5A,SOX9,WNT11,FOXA3,ASCL1,PKLR,FOXO1,TGFBR1,ARID5B,ONECUT1,ONECUT2,HOXA5,HOXB3,SMO,POU3F2,HES1,LY6E,HNF4G,HNF4A,HNF1A,SLC2A2,NKX2-2,NR0B1,EIF2AK3,RBPJ,WNT4,STRA6,PDGFRA,PDGFRB,BMP4,BMP2,BMP5,AKT1,FGF2,ETS1,GATA2,GATA6,GATA3,ALDH1A2,BAK1,TCF7L2,IL6R,GSK3A,GSK3B,BAD,RFX3,SIX1…	-0.930366	0.000925998	0.0218725
RNA splicing(GO:0008380)	411	1008	86	16363	0.52	325	41646	0.77	PRMT7,SLU7,YTHDC1,PAPOLB,PAPOLA,CSTF1,SCAF11,PPIL3,CPSF3,CPSF2,RNF219,RBM38,RBM22,RBM17,RBM11,TXNL4B,MPHOSPH10,AHNAK,WBP4,CIR1,SNRPC,SNRPF,SON,SRSF2,SRSF7,SRSF9,GEMIN6,GEMIN5,GEMIN2,CLK1,DDX23,DDX47,U2AF2,SFSWAP,FRG1,TSEN2,ESRP1,ESRP2,PCBP1,NSRP1,UPF3B,SRPK1,MAGOHB,WBP11,PNN,DDX39B,PHAX,RP9,SNRPA1,RBMX,RNPC3,JMJD6,DHX38,THOC7,THOC1,DHX16,PRPF4B,TIA1,DYRK1A,DDX1,CDK13,LSM5,LSM3,LSM2,PRPF40A,CRNKL1…	SART3,SART1,CCAR1,DHX8,DHX9,CTNNBL1,PRMT7,PRMT5,SNRNP200,ZBTB8OS,FUS,PPAN,SLU7,PPIH,PPIG,PPWD1,RSRC1,SMN1,ZRANB2,ZRSR2,YTHDC1,TFIP11,PAPOLB,PAPOLA,WT1,CSTF3,CSTF2,CSTF1,NUDT21,PABPC1,TTF2,SCAF11,HNRNPUL1,PABPN1,PPIL1,PPIL3,PLRG1,RRAGC,SNW1,PPP2CA,CDC5L,CPSF7,CPSF3,CPSF2,RBM8A,RNF219,CDC40,RBM4B,RBM42,RBM38,RBM39,CD2BP2,RBM28,RBM25,RBM22,RBM20,AFF2,PPP1R8,RBM17,RBM10,RBM11,BUD13,CLASRP,WTAP,ISY1,U…	-0.395295	0.000934999	0.0219741
cellular calcium ion homeostasis(GO:0006874)	286	694	56	16393	0.34	230	41741	0.55	CACNB4,NEU1,ADRA1A,GCK,CAMK2D,SNCA,AGTR1,RIC3,XK,BDKRB1,BDKRB2,PLA2G6,FKBP1B,PRKCE,JAK2,EDNRB,EPHX2,GRIK2,TRDN,IBTK,TRPV4,TRPM1,INPP4B,CALM1,SRI,ABL1,DIAPH1,PTK2B,TPT1,ATP7B,GNG3,CCL21,CCL19,GPR12,CHRNA7,GTF2I,GSTO1,NPTN,SLC24A2,AKAP6,CD40,CD55,JPH3,GJA1,JPH1,CXCR4,CUL5,PIK3CB,RYR2,LPAR2,ATP2A1,CASR,PDE4D,CACNA1C,RAP1GDS1,ERO1A	CACNB4,ATG5,NEU1,TBXA2R,ADRA1A,GCK,C5AR1,PDPK1,SLC25A23,SLC25A27,CAMK2D,SYPL2,XCL1,VAPB,SNCA,ITPR3,ITPR1,WFS1,PTPN6,PTPRC,AGTR1,CCR10,F2,RIC3,OPRM1,C5,OPRL1,CXCL11,CXCL12,CXCL10,PVALB,CYBA,XK,BDKRB1,BDKRB2,PLA2G6,FKBP1A,FKBP1B,TPCN2,PRKCA,PRKCE,PRKCB,ADCYAP1,KCNA5,MICU1,HERPUD1,DLG4,JAK2,EDNRA,EDNRB,EPHX2,BBC3,GRIK2,TGFB1,GRIN1,GRINA,TRDN,APOE,STOML2,IBTK,TRPV4,HEXB,TRPM8,ESR1,TRPM1,INPP4B,S1PR3,…	-0.478098	0.000958655	0.0219741
positive regulation of cell activation(GO:0050867)	253	633	48	16401	0.29	205	41766	0.49	BCL10,FYN,PTPRJ,FCER1G,SOCS5,IL7,PRKCQ,YES1,PDCD1LG2,ZBTB1,AP1G1,JAK2,CD276,CD274,VNN1,IL15RA,ADORA2B,PLEK,IL2RA,TESPA1,LGALS1,DPP4,IGF1,PELI1,GPR183,CCL21,CCL19,RPS6KA1,MAPKAP1,PPP2R3C,MYD88,HSPH1,HLA-DRB3,HLA-DRB4,HLA-DRB5,HPS1,AIF1,MAP3K7,HLA-DRA,ZNF335,AXL,IL15,HLA-A,CD40,CD55,PDPN,GLI2,GLI3	SART1,ZAP70,TICAM1,BCL10,FADD,IL6ST,SASH3,PDPK1,FYN,TNIP2,PTPRJ,HLX,VAV3,VAV1,XCL1,FCER1G,FCER1A,TBX21,AP3B1,AP3D1,ITPKB,SOCS5,PTPN6,PAK2,PAK1,PTPRC,IL12A,IL7,TNFSF9,BCL6,MTOR,PRKCQ,PRKCZ,YES1,IGFBP2,PDCD1LG2,CD226,TCF3,ZBTB1,AP1G1,CDC42,JAK2,ADORA3,TIRAP,WNT5A,CD276,MALT1,CD274,CD247,MEF2C,BTK,VNN1,GAS6,TGFB1,IL15RA,MLST8,ADORA2B,IL12RB1,ICOS,CD2,CD4,CD5,MAP3K14,PLEK,BLM,IL2RA,TESPA1,SYK,IL23A,T…	-0.517069	0.000951032	0.0219741
negative regulation of peptidase activity(GO:0010466)	184	569	32	16417	0.19	152	41819	0.36	TFPI,PAX2,SNCA,TRIAP1,CYTB,C4A,USP14,AQP1,SFN,NLE1,UCHL5,SPOCK1,CDKN2D,RPS6KA1,DHCR24,SERPINE3,SERPINI2,SERPINA5,SERPINA3,SERPINA1,SERPINB9,SERPINC1,RAF1,TNFAIP8,SPINK6,CRB2,PTTG1,SERPINA10,SERPINA11,TIMP4,ANXA8,RFFL	TFPI,PAX2,MDM2,PARK7,HGF,SNCA,CST9L,PAK2,GPI,PCID2,WNT9A,C3,C5,NR4A1,IFI16,KLF4,TRIAP1,WFIKKN1,BIRC6,SORL1,HRG,HERPUD1,SEBOX,PEBP1,CYTB,PSMF1,C4A,SPP2,FNIP1,GAS6,USP14,USP47,ARRB2,ARRB1,CD109,WFDC12,LAMTOR5,ITIH1,ITIH4,ITIH2,ITIH3,BCL2L12,RENBP,AQP1,SFN,RNF34,SRC,NLE1,TFAP2B,IFI6,PROS1,XIAP,SSPO,DDX3X,UCHL5,SIAH2,SPOCK1,CDKN2D,APLP2,VEGFA,VIL1,AMBP,WFDC1,WFDC2,WFDC3,SH3RF1,RPS6KA3,RPS6KA1,PRDX5,P…	-0.623111	0.00096086	0.0219741
skeletal muscle organ development(GO:0060538)	183	291	32	16417	0.19	151	41820	0.36	ZFHX3,FOS,CNTFR,COPS2,NR2F2,MAFF,ILK,XK,KLF5,MSTN,TBX3,DDX17,HIF1AN,FOXN2,CFLAR,DCN,DNER,GPCPD1,MYF6,ASB2,ACVR1,ELN,RPS6KB1,KIAA1161,HOMER1,BASP1,CDON,SAP30,EGR1,EGR2,TCF21,NACA	HDAC5,HDAC4,ATF3,HDAC9,ZFHX3,NR1D2,MEOX2,FOS,HMG20B,HLF,HLX,CNTFR,COPS2,NR2F2,ARNTL,WT1,MAFF,CYP26B1,ILK,MYLK2,PPP3CA,CXCL10,VAMP5,NR4A1,S100B,CXCL14,ID3,XK,KLF5,BCL9,MYLPF,KLHL40,KLHL41,IGFBP5,MSTN,HIVEP3,PITX2,BCL9L,TBX3,TBX1,DKK1,SOX9,SOX8,BTG2,MYL6B,MEF2C,USP19,MEF2D,TGFB1,DDX17,BIN3,HIF1AN,MYOD1,MYOCD,FOXN2,IGSF8,CFLAR,FOXP2,BOC,ACTA1,TAZ,DCN,DNER,HEYL,GPCPD1,SKI,USP2,NUPR1,ANKRD2,ANKRD1,MYL…	-0.616487	0.000951975	0.0219741
skeletal muscle tissue development(GO:0007519)	174	272	30	16419	0.18	144	41827	0.34	ZFHX3,FOS,COPS2,NR2F2,MAFF,ILK,XK,KLF5,MSTN,TBX3,DDX17,HIF1AN,FOXN2,CFLAR,DCN,DNER,GPCPD1,MYF6,ASB2,ACVR1,ELN,RPS6KB1,KIAA1161,HOMER1,CDON,SAP30,EGR1,EGR2,TCF21,NACA	HDAC5,HDAC4,ATF3,HDAC9,ZFHX3,NR1D2,MEOX2,FOS,HMG20B,HLF,HLX,COPS2,NR2F2,ARNTL,MAFF,CYP26B1,ILK,MYLK2,PPP3CA,CXCL10,VAMP5,NR4A1,S100B,CXCL14,ID3,XK,KLF5,BCL9,MYLPF,KLHL40,KLHL41,IGFBP5,MSTN,HIVEP3,PITX2,BCL9L,TBX3,TBX1,DKK1,SOX9,SOX8,BTG2,MYL6B,MEF2C,USP19,MEF2D,TGFB1,DDX17,BIN3,HIF1AN,MYOD1,MYOCD,FOXN2,IGSF8,CFLAR,FOXP2,BOC,ACTA1,TAZ,DCN,DNER,HEYL,GPCPD1,SKI,USP2,NUPR1,ANKRD2,ANKRD1,MYL6,MYL3,SMO…	-0.633513	0.000956403	0.0219741
regulation of peptidyl-tyrosine phosphorylation(GO:0050730)	166	434	28	16421	0.17	138	41833	0.33	LRRK1,SOCS5,EPHA7,SNX6,PRKCE,JAK2,EREG,FBXW7,IBTK,ADAM17,ABL1,PTK2B,IGF1,PDGFB,PDGFC,KITLG,AFAP1L2,GPRC5B,ERBB4,THBS4,CSF2,LRP8,IL15,CD40,HCLS1,FLT3,SAMSN1,ANGPT1	ERRFI1,GHR,LRRK1,IL6ST,PECAM1,HGF,ARHGEF2,FCER1A,SOCS4,SOCS5,PTPN6,PTPN2,PAK2,PTPRC,HYAL2,IL12A,EPHA7,SNX6,MTOR,PRKCA,PRKCE,PRKCD,PRKCZ,HRG,HPX,PPP2CA,SEBOX,JAK2,ADORA1,GAS6,EREG,MLST8,ARRB2,FBXW7,CCK,CD4,SEMA4D,CSF1R,ERCC6,SYK,IBTK,IL23A,CLCF1,ADAM17,TNFRSF1A,UNC119,TP53,ABI1,EGF,ABL1,ADIPOQ,ZGPAT,HES1,ITGB2,ITGB3,ITGB1,ITGA5,PTK2B,HTR2A,STK11,ZFYVE28,IL31RA,IGF1,IGF2,CNTF,APLP2,VEGFB,VEGFA,PDGF…	-0.659925	0.000956977	0.0219741
developmental growth involved in morphogenesis(GO:0060560)	157	283	26	16423	0.16	131	41840	0.31	DCLK1,MAPT,ILK,BMPR2,TNR,TRPV2,DCC,ABL1,LHX2,RNF6,SPG20,COBL,COMP,LIMK1,RAPH1,SPRY2,AURKA,ROBO1,RTN4,TRIM28,GSK3B,SLIT2,EPB41L5,ULK1,ULK2,CARM1	BARHL2,NET1,DCLK1,ANAPC2,FN1,MAPT,NRCAM,TWF2,BDNF,MED1,DSCAM,ILK,PPP3CB,CXCL12,VANGL2,TMTC3,PLXNA3,PLXNA4,PRKCZ,MSX2,TBX2,WNT5A,SOX9,SPP1,TGFB1,BMPR2,APOE,SEMA7A,BIN3,SEMA3F,SEMA3A,SEMA4F,SEMA4D,TTL,TNC,TNR,TGFBR2,TRPV2,NKD1,ESR1,DCC,S1PR1,SRF,ARHGAP4,SMO,USP9X,MED12,AREG,ABL1,RND2,LHX2,NTRK3,RNF6,ITGB1,MAP1B,WDR36,SPG20,PAFAH1B1,STC1,AATK,EVC,MGLL,MEGF8,BNC2,COBL,VEGFA,BCL11A,WNT3,COMP,IQGAP1,LI…	-0.681931	0.000942562	0.0219741
defense response to bacterium(GO:0042742)	110	325	16	16433	0.1	94	41877	0.22	ADAMTS4,ACP5,RPL39,FCER1G,HP,PLAC8,COCH,NOD1,CCL20,MYD88,TNFAIP8,IL10,NCF1,DEF6,LYZ,RAB1A	NLRC4,C5AR1,PPBP,IL22RA1,NLRP1,ADAMTS5,ADAMTS4,ACP5,RPL39,PGLYRP2,MAVS,HCK,FCER1G,DROSHA,IL12A,HP,TNFSF8,BCL3,PRKCD,MBL2,IRF8,ROMO1,TBK1,TIRAP,MYO1F,CD4,CEBPE,PLD1,WFDC12,HIST3H2BB,BPI,SYK,IL23A,CFP,SPN,CRP,TNFRSF1A,PLAC8,ISG15,P2RX7,SEH1L,PYCARD,FAU,GBP6,FGR,VGF,DMBT1,SLAMF8,LYST,COCH,SSC5D,TMF1,PELI3,RBPJ,HAMP,MMP7,GNLY,CARD9,NOD2,NOD1,CCL20,SELP,S100A9,TUSC2,SERPINE1,MYD88,SIRT2,TNFAIP8,NOTCH2…	-0.835261	0.000945278	0.0219741
mRNA processing(GO:0006397)	503	1250	109	16340	0.66	394	41577	0.94	PRMT7,SLU7,TUT1,PAN3,YTHDC1,PARN,PAPOLB,PAPOLA,CSTF1,FTSJ1,SCAF11,PPIL3,CPSF6,CPSF3,CPSF2,CDC73,RNF219,RNGTT,RBM38,RBM27,RBM26,RBM22,RBM17,RBM11,TXNL4B,CNOT8,CNOT2,CNOT1,CNOT4,TDRD3,WBP4,CIR1,SNRPC,SNRPF,PNPT1,SON,SRSF2,SRSF7,SRSF9,GEMIN6,GEMIN5,GEMIN2,GTF2H4,DDX23,DDX47,U2AF2,SFSWAP,FRG1,TSEN2,ESRP1,ESRP2,PCBP1,NSRP1,UPF3B,SRPK1,MAGOHB,WBP11,TOB1,PNN,DDX39B,EIF4G1,SSU72,TNRC6C,PHAX,LSM11,SNRPA1,…	SART3,SART1,CCAR1,DHX8,DHX9,POP4,CTNNBL1,CSTF2T,PRMT7,PRMT5,SNRNP200,ADARB1,ADARB2,SLBP,FUS,TNKS1BP1,CPEB3,SLU7,PPIH,TUT1,PPWD1,RSRC1,SMN1,PHRF1,ZRANB2,ZRSR2,PAN2,PAN3,YTHDC1,ADAR,PARN,TFIP11,PAPOLB,PAPOLA,PAPOLG,PAF1,CSTF3,CSTF2,CSTF1,FTSJ1,NUDT21,PABPC1,TTF2,SCAF11,HNRNPUL1,PABPN1,PPIL1,PPIL3,PLRG1,ZC3H3,SNW1,CNOT10,CNOT11,RNASEL,CDC5L,CPSF7,CPSF6,CPSF4,CPSF3,CPSF2,CDC73,RNASE4,RBM8A,RNF219,CDC…	-0.351072	0.000998885	0.0227633
extracellular matrix organization(GO:0030198)	389	796	81	16368	0.49	308	41663	0.73	FBLN2,FBLN5,SULF2,SULF1,PTPRS,ADAMTS4,MFAP1,MFAP3,MFAP4,SNCA,CYR61,COL24A1,ILK,GFOD2,VCAN,COL12A1,FLOT1,MMP16,TGFB3,TGFB2,COL21A1,PLEC,TTR,TNR,MPV17,BMP10,EFEMP1,DCN,ADAM17,TFAP2A,ABL1,F11R,DST,ITGB6,ITGA9,FAP,DPP4,COL1A2,LOXL2,POSTN,ELN,ENG,SDC1,HAS3,COL3A1,PDGFB,MMP9,COMP,LTBP1,ADAMTS20,COL17A1,BMP7,TNXB,OLFML2B,OLFML2A,COL5A2,ETS1,LAMC3,LAMB1,LAMA2,LAMA4,COL14A1,SMARCA4,PTK2,RGCC,DDR1,NCAN,CDH…	EGFLAM,GFAP,NR2E1,FBLN1,FBLN2,FBLN5,FN1,PPIB,NOXO1,CSGALNACT1,SULF2,SULF1,PTPRS,ADAMTS2,ADAMTS5,ADAMTS4,MFAP1,MFAP2,MFAP3,MFAP4,MFAP5,KIF9,SNCA,NFKB2,CYR61,RXFP1,COL24A1,WT1,ILK,CRTAP,ELF3,GFOD2,SH3PXD2B,VCAN,CIB1,COL12A1,FKBP1A,BCL3,APBB2,BCAN,PRKCA,COL23A1,HPN,NID1,NID2,SEBOX,TPSAB1,JAM2,JAM3,COL11A2,COL11A1,FLOT1,COL22A1,SOX9,FOXF1,BSG,KLKB1,SPP1,GAS6,EGFL6,MMP19,MMP16,MMP15,MMP14,MMP12,TGFB3,…	-0.401365	0.00101868	0.0231329
extracellular structure organization(GO:0043062)	390	799	81	16368	0.49	309	41662	0.74	FBLN2,FBLN5,SULF2,SULF1,PTPRS,ADAMTS4,MFAP1,MFAP3,MFAP4,SNCA,CYR61,COL24A1,ILK,GFOD2,VCAN,COL12A1,FLOT1,MMP16,TGFB3,TGFB2,COL21A1,PLEC,TTR,TNR,MPV17,BMP10,EFEMP1,DCN,ADAM17,TFAP2A,ABL1,F11R,DST,ITGB6,ITGA9,FAP,DPP4,COL1A2,LOXL2,POSTN,ELN,ENG,SDC1,HAS3,COL3A1,PDGFB,MMP9,COMP,LTBP1,ADAMTS20,COL17A1,BMP7,TNXB,OLFML2B,OLFML2A,COL5A2,ETS1,LAMC3,LAMB1,LAMA2,LAMA4,COL14A1,SMARCA4,PTK2,RGCC,DDR1,NCAN,CDH…	EGFLAM,GFAP,NR2E1,FBLN1,FBLN2,FBLN5,FN1,PPIB,NOXO1,CSGALNACT1,SULF2,SULF1,PTPRS,ADAMTS2,ADAMTS5,ADAMTS4,MFAP1,MFAP2,MFAP3,MFAP4,MFAP5,KIF9,SNCA,NFKB2,CYR61,RXFP1,COL24A1,WT1,ILK,CRTAP,ELF3,GFOD2,SH3PXD2B,VCAN,CIB1,COL12A1,FKBP1A,BCL3,APBB2,BCAN,PRKCA,COL23A1,HPN,NID1,NID2,SEBOX,TPSAB1,JAM2,JAM3,COL11A2,COL11A1,FLOT1,COL22A1,SOX9,FOXF1,BSG,KLKB1,SPP1,GAS6,EGFL6,MMP19,MMP16,MMP15,MMP14,MMP12,TGFB3,…	-0.404631	0.00102239	0.0231359
regulation of Wnt signaling pathway(GO:0030111)	205	488	37	16412	0.22	168	41803	0.4	HDAC2,SULF2,SULF1,RSPO2,ILK,LZTS2,LATS2,CDC73,SOX7,SCYL2,CSNK1E,FOXO1,ATP6V1C2,CAPRIN2,ANKRD6,CTHRC1,NLE1,ABL1,HNF1A,LGR5,CXXC4,FGF9,GPRC5B,JUP,GSK3B,RNF146,APC,NPHP3,CDH1,EGR1,DAPK3,MCC,ZEB2,GLI3,DAB2IP,FZD6,CBY1	HDAC2,FRZB,WWOX,MDFI,CTDNEP1,SULF2,SULF1,PTPRO,SDHAF2,RSPO1,RSPO2,PPM1A,ZRANB1,NFKB1,TBX18,ARNTL,AXIN2,AXIN1,WLS,ILK,LZTS2,SPIN1,VANGL2,MBD2,TNKS2,TSKU,LATS1,LATS2,PPP2CA,HHEX,AMER1,CDC73,CHD8,CYLD,DKK2,DKK3,DKK1,WNT5A,SOX7,SOX9,WNT11,WNT2B,SCYL2,APC2,USP34,CSNK1D,CSNK1E,UBR5,SNAI2,FOXO1,FOXO3,CCND1,NKD1,NKD2,TSC2,TRPM4,IFT20,RAPGEF1,SKI,ATP6V1C2,CAPRIN2,ANKRD6,SRC,RNF43,CTHRC1,MED12,NLE1,EDA,ABL…	-0.578091	0.00103208	0.023274
single organismal cell-cell adhesion(GO:0016337)	328	828	66	16383	0.4	262	41709	0.62	BMPR1B,CYR61,NINJ2,ILK,LMO7,EPHB3,EPHA7,CYFIP2,PRKCQ,JAK2,VNN1,TGFB2,FOXA1,MYO10,PLEK,TNR,VMP1,ASTN1,TEK,LGALS1,MAPK7,NLGN4X,MYCN,FNDC3A,ABL1,DPP4,STXBP1,CTNNB1,CTNNA1,CTNNA3,CTNNA2,MYADM,CCL21,NCAM2,BMP7,TNXB,CLIC1,ROCK1,ANK3,LAMB1,THBS4,JUP,COL14A1,ALOX12,CERCAM,PTK2,RGCC,EPCAM,NPHP1,CDH1,CDH3,COL13A1,SLIT2,NEGR1,PDPN,PIK3CB,EPB41L5,MGP,CNTN4,GLDN,MSN,P2RY12,CXADR,GCNT2,NRXN3,NRXN1	ZAP70,PARVA,NET1,PIEZO1,ZFP36L1,PLEKHA7,TNIP1,BMPR1B,PTPRU,NRCAM,PIP5K1C,TSPAN32,HBB,CYR61,TBX18,NINJ2,PTPN6,BVES,PTPRC,ILK,LMO7,CXCL12,TTYH1,OLR1,PRKG1,GTPBP4,EPHB3,CELSR2,EPHA7,KLF4,CYFIP2,PRKCA,PRKCD,PRKCQ,CD209,FBLIM1,CHAD,CDC42,DLG5,DLG1,JAM2,JAM3,JAK2,COL11A1,TENM2,WNT5A,SOX9,FOXF1,VNN1,GAS6,PKP2,PKP3,PKP4,MMP24,TGFB1,TGFB2,ICOS,FOXA1,MYO10,SLC7A11,CD2,SEMA4D,PLEK,SNAI2,IGSF5,TNR,NFASC,KIFC…	-0.444217	0.00106587	0.0237872
regulation of protein complex assembly(GO:0043254)	268	686	52	16397	0.32	216	41755	0.51	ATF7IP,SPTBN1,MAPT,SNCA,TBX20,SUMO1,SPTAN1,VDAC2,STMN1,PICK1,PRKCE,JMY,SAR1A,DNM1L,SPTB,BID,PLEK,HEY2,ACTR3,ACTR2,CLU,ARF1,ABI2,ATAT1,FKBP4,HNF1A,PTK2B,ELN,EVL,CDKN1B,STXBP1,STXBP6,SENP6,MYADM,CCL21,CAPZB,RAF1,SLAIN2,CAND1,RDX,MAP3K7,RGS2,CSF2,GSK3B,HCLS1,APC,SLIT2,TRIOBP,PMAIP1,ARPC5L,DAB2IP,LMOD2	ATF7IP,HDAC6,MAPRE1,FAF1,PIEZO1,SPTBN5,SPTBN4,SPTBN2,SPTBN1,EML2,PARK7,PECAM1,MAPT,ARHGEF5,CAPZA2,CAPZA1,TWF1,TWF2,VASP,PPM1A,KIF9,HCK,SNCA,ADD2,ADD1,TBX20,SUMO1,PAK3,GSN,SH3GLB1,SPTAN1,VDAC2,LMO4,IDE,STMN2,STMN1,AVIL,PICK1,SNX9,MTPN,MTOR,SORL1,PRKCE,PRKCD,LDLRAD4,PRKCZ,HRG,IRF8,LATS1,FBLIM1,JMY,SAR1A,CDC42,DLG1,AP1AR,DKK1,TENM1,BBC3,DNM1L,TGFB1,MLST8,SPTB,TBCD,CCK,TAL1,BID,PLEK,BIK,BMF,WHAMM,TPR…	-0.489314	0.00106556	0.0237872
neuron death(GO:0070997)	268	536	52	16397	0.32	216	41755	0.51	SCN2A,LRRK2,SIGMAR1,FYN,CNTFR,SNCA,ILK,NR4A2,EPHA7,XRCC4,XRCC2,JAK2,MSH2,GRIK2,TGFB3,TGFB2,FBXW7,BID,DCC,SET,CLU,TM9SF1,TP73,TFAP2A,ABL1,GRM4,PTK2B,POLB,LGMN,HIF1A,STXBP1,CTNNB1,GPR75,OXR1,DHCR24,FASLG,ROCK1,BAG5,ATM,AXL,GABRB2,EGR1,ITSN1,BNIP3,MAX,CASP3,CASP7,EGLN3,PMAIP1,ANGPT1,NAE1,CHMP4A	BARHL1,SCN2A,ATN1,AIFM1,ADNP,FADD,LRRK2,SARM1,C5AR1,CPEB4,SIGMAR1,MEOX2,FYN,SLC25A27,NLRP1,STAMBP,PARK7,PPT1,CNTFR,NR3C1,SNCA,BDNF,WFS1,NRBP2,PAK3,GPI,ILK,NR4A2,KLK6,EPHB1,EPHA7,G6PD,CHL1,SOD1,SOD2,CHP1,HTT,SORL1,PRKCI,PRKCG,FAIM2,XRCC4,XRCC2,UNC5B,CDC42,HMOX1,RRAS2,JAK2,APAF1,CDC34,MCL1,BBC3,BTG2,MSH2,MEF2C,GRIK2,GRIK5,TGFB3,TGFB2,ASCL1,FBXW7,GRIN1,PM20D1,APOE,GRID2,MAP3K11,BID,FOXO3,BOK,BCL2L11…	-0.489314	0.00106556	0.0237872
cofactor biosynthetic process(GO:0051188)	160	438	27	16422	0.16	133	41838	0.32	DHFR,PPOX,SNCA,NIF3L1,BDH2,ELOVL4,ELOVL2,MCM9,MCM6,GART,SPTB,FPGS,HNF1A,MTHFD1,KYNU,COX10,COQ5,COQ4,COQ3,COQ2,IREB2,GPHN,ANK1,PDP2,TMEM14C,ME1,RFC2	ATIC,PPCS,DHFR,FXN,SLC25A39,PPOX,ASPDH,ACLY,TECR,SNCA,NIF3L1,NFS1,UBIAD1,RSAD1,BDH2,ACSL1,ACSL4,ACSL6,ACSL5,ABCB6,COASY,TSPO,ACSS2,ACSS1,NMRK1,NMRK2,ATPIF1,DLAT,ELOVL1,ELOVL5,ELOVL4,ELOVL2,ELOVL7,ELOVL6,NMNAT3,NMNAT2,NMNAT1,QDPR,MCM9,MCM8,MCM7,MCM3,MCM4,MCM6,CYP4F2,GART,SPTB,UROD,UROS,FECH,NADSYN1,MAT1A,TGFBR1,MAT2A,MAT2B,IBA57,SPR,FPGS,LIAS,DLD,FAS,WDR87,HNF1A,MTHFD1,MTHFD2,MTHFD1L,KYNU,TPK1,GCD…	-0.659329	0.00107611	0.0239332
cellular amide metabolic process(GO:0043603)	169	446	29	16420	0.18	140	41831	0.33	NR1H4,ASNSD1,SLC25A15,BDH2,LRRTM3,SLC5A6,GGCT,AMDHD1,VNN1,VNN2,SPCS3,CLU,CPQ,GLRX2,ARG1,TMED10,CLN5,ASPG,ASNS,TPP1,GSTA4,SMPDL3A,GMPS,SMPD3,CPN1,CPS1,ASL,MME,PCCA	GHR,PPCS,NR1H4,ASNSD1,SLC25A15,FTCD,PGLYRP2,HAL,GSS,GSR,HAGHL,BDH2,SGMS2,PGAM1,SGMS1,AASDHPPT,LRRTM3,IDE,ABCA7,PC,COASY,G6PD,SOD1,SOD2,HTT,SORL1,PRKCD,SLC5A6,GGCT,AMDHD1,GGT5,GGT7,MGST1,MGST2,BTD,VNN1,VNN2,SEC11C,SEC11A,APEH,APOE,IDH1,NIT2,ASRGL1,SPCS3,SPCS1,SPCS2,TRMU,CLU,CPQ,GLRX2,UNC13A,ARG1,ARG2,NCSTN,PNKD,DMD,TMED10,FAS,CLN3,CLN5,ASPG,ASS1,ASNS,FASN,GCLC,GSAP,GCLM,TPP1,ALDH5A1,UROC1,GSTA1,GS…	-0.639209	0.00108223	0.0239869
lipid localization(GO:0010876)	281	726	55	16394	0.33	226	41745	0.54	NEU1,FTO,SIGMAR1,PLEKHA8,BDKRB2,TRIAP1,PLA2G6,PLA2R1,MSR1,ENPP1,OSBPL3,OSBPL9,ABCG8,ABCG5,ABCC2,ATP8A2,NFKBIA,FBXW7,APOB,APOM,PLTP,APOA2,CLU,HNF1A,POMC,STARD5,ACVR1C,TMEM30A,SCP2,SLC27A2,SLC27A5,SLC27A4,NPC2,LDLR,SERPINA5,OSBPL10,NCOR1,PPARD,PPARG,FITM1,PLIN2,BSCL2,GOT2,CPT2,ATP10B,LCAT,APOLD1,NRIP1,LDLRAP1,CROT,GLTP,INHBA,DGAT2,HNRNPK,NUS1	KISS1R,CFTR,NEU1,NR1H2,NR1H3,FTO,SIGMAR1,SLC25A20,PLEKHA8,SLC25A17,ANGPTL3,ESYT2,ESYT1,ESYT3,NFKB1,SCARB1,MEST,PTPN2,C3,ACSL1,ACSL4,ACSL3,ACSL6,MTTP,VAMP7,ABCA7,ABCA2,ABCA1,ABCA5,CHKA,BDKRB2,TRIAP1,PLA2G6,PLA2G5,TSPO,GLTPD2,SORL1,PRKCD,PLA2R1,MSR1,SOAT1,SOAT2,CPT1B,CPT1A,PSAP,ENPP1,OSBPL5,OSBPL2,OSBPL3,OSBPL8,OSBPL9,OSBPL6,MCAT,OSBPL7,ABCG1,ABCG8,ABCG5,ABCD1,ABCC2,ATP8B1,ATP8B2,ATP8B3,ATP8A2,CYP4…	-0.478538	0.0010896	0.0240679
tube development(GO:0035295)	594	964	132	16317	0.8	462	41509	1.1	BCL10,PAX2,ACAT1,NR1H4,ITGB1BP1,HS6ST1,ATXN1,HDC,RSPO2,TBX20,KLHL3,ILK,ASAH1,AR,ID2,EPHB3,KLF5,PLXND1,CHRD,BBS4,BBS7,CHD7,EDNRB,HHIP,TBX3,TBX5,CSNK2B,TGFB3,TGFB2,BMPR2,FBXW7,FOXA1,SEMA3E,DCHS1,FOXJ1,BMPER,ARID1A,SPDEF,TAB1,AQP1,HOXA1,HOXA5,SP3,CTHRC1,ARG1,MYCN,TP73,IFT122,TFAP2A,IFT88,GDF2,LHX2,WDR48,CECR2,ACVR1,NKX2-2,EN1,ENG,ACVR2B,IGF1,HIF1A,COBL,SDC1,ZFPM2,COL3A1,RC3H2,SREBF1,SETDB2,PGF,CTNNB…	PPP1CA,HSD11B1,ERRFI1,CFTR,DHCR7,ATRX,MTSS1,ENAH,NET1,BCL10,PAX6,PAX3,PAX2,PAX8,GAK,ACAT1,NR1H4,ZFP36L1,YIPF6,ITGB1BP1,HS6ST1,ATXN1,BMPR1A,OPA1,ADAMTS2,HLX,HDC,RSPO2,IPMK,VASP,NR3C1,BDNF,TBX20,RXFP1,TBX18,MED1,KLHL3,WT1,PAK1,ILK,ASAH1,AR,PKDCC,C1GALT1,LMO4,CXCL12,ID2,ID1,VANGL2,EPHB3,KLF5,CELSR1,EPHA2,TMTC3,PLXNA2,PLXNB2,PLXND1,CHRD,PRKD2,DLC1,MAGED1,TGIF1,JAG1,DLL1,HHEX,DLL4,BBS4,BBS5,BBS7,NIPBL…	-0.31906	0.00111368	0.0245161
fatty acid biosynthetic process(GO:0006633)	129	327	20	16429	0.12	109	41862	0.26	ACADL,ACSM3,ACSM1,ELOVL4,ELOVL2,HACD4,SCD5,HNF1A,SCP2,PTGS1,SCD,ALOX12,INSIG2,PECR,FAM213B,PTGES2,PRKAG1,ALOX5AP,CBR1,TBXAS1	ACADL,NR1H2,NR1H3,FA2H,TECR,ACADVL,FCER1A,MECR,AASDHPPT,DECR2,ACSL3,ACSM3,ACSM1,NDUFAB1,ACSF3,PLA2G5,ACSS2,ACSS1,ELOVL1,ELOVL5,ELOVL4,ELOVL2,ELOVL7,ELOVL6,MSMO1,MCAT,GGT5,GGT7,MGST2,HACD3,HACD2,HACD4,HACD1,MYO5A,SYK,APOA4,APOA5,WDTC1,OLAH,LIPC,SC5D,MAPK9,DEGS1,LIAS,SCD5,SCAP,THNSL2,ALOX5,FAS,HNF1A,FADS1,FADS3,FADS2,STK11,AKR1C3,FASN,MGLL,EDN1,PTGES,PTGDS,PTGIS,SCP2,PTGS2,PTGS1,CH25H,PTGR1,AVPR1A,…	-0.760285	0.00111861	0.0245412
extrinsic apoptotic signaling pathway(GO:0097191)	238	516	45	16404	0.27	193	41778	0.46	BCL10,FYN,BMPR1B,AR,IL7,DEPTOR,JAK2,TGFB2,BID,CFLAR,TNFRSF1B,MAPK7,DDX47,ACVR1,CASP8AP2,IGF1,CTNNA1,RPS6KB1,TRADD,KITLG,KIAA0141,BMP5,FASLG,MOAP1,RAF1,PHIP,ROCK2,PDIA3,RIPK1,CSF2,GSK3B,BLOC1S2,SP100,HSPA1L,HMGB2,DEDD,DAPK3,INHBA,CASP3,CASP8,MAL,PMAIP1,EYA2,DAB2IP,RFFL	PPP1CA,PARP2,BCL10,FADD,BEX3,FAF1,WWOX,PDPK1,FYN,TERT,PARK7,BMPR1B,HGF,ARHGEF2,MADD,PAK2,PTPRC,SGMS1,PEA15,HYAL2,AR,IL12A,SORT1,ACSL5,IL7,LMNA,STRADB,CIB1,DEDD2,BIRC6,HTT,DEPTOR,UNC5B,HMOX1,JAK2,JAK3,CYLD,MCL1,PSME3,MKNK2,MKNK1,TGFB1,TGFB2,KRT18,BID,SNAI2,FOXO3,CFLAR,BOK,BCL2L11,BCL2L10,TGFBR1,TRPS1,G0S2,ITM2B,FEM1B,DBH,LGALS3,RNF34,SRC,TNFRSF1A,TNFRSF1B,RNF41,MAPK7,SRPX,ZMYND11,P2RX7,MLLT11,ITGA…	-0.521183	0.00112636	0.0246277
response to lipopolysaccharide(GO:0032496)	239	408	45	16404	0.27	194	41777	0.46	NR1H4,FOS,ACP5,SNCA,MAPKAPK2,BDKRB1,CHUK,PRKCE,CDC73,JAK2,EDNRB,ZCCHC11,CMPK2,NFKBIA,APOB,AKIRIN2,DCN,ADAM17,TNFRSF1B,MAPK8,ARG1,ABL1,LY96,PELI1,CCL20,RPS6KB1,FASLG,SERPINA1,MYD88,CPS1,CSF2,AXL,IL10,CD40,CD55,GJB6,CD14,HMGB2,TJP1,CASP8,HNRNPA0,PDE4D,TIMP4,DAB2IP,NFKBIL1	TICAM1,TICAM2,NLRC3,TBXA2R,ADH5,C5AR1,NR1H4,NR1H3,SASH1,NR1D1,IL10RA,FOS,TNIP2,NLRP3,GFI1,ACP5,MAOB,GNG12,CSF2RB,HCK,SNCA,NFKB1,PAF1,SCARB1,SGMS1,OPRM1,IL12A,CXCL10,MAPKAPK3,ABCA1,MAPKAPK2,CXCL16,BDKRB1,MTDH,TH,CYP27B1,SOD2,TSPO,IRAK3,CHUK,IRAK2,PRKCA,IRAK1,PRKCE,IRF8,IRF3,TCF3,KCNJ8,MTA1,CDC73,JAK2,EDNRA,EDNRB,ZCCHC11,TIRAP,WNT5A,CMPK2,MGST1,MEF2C,NFKBIB,NFKBIA,PLSCR4,PLSCR3,TGFB1,IL12RB2,CEBPE,…	-0.526375	0.00113117	0.0246497
sensory perception(GO:0007600)	385	1597	80	16369	0.49	305	41666	0.73	CACNB2,CACNB4,NEU1,RABGGTB,RABGGTA,PAX2,GJA10,FYN,ADCY3,SLITRK6,REEP2,MC1R,BDKRB1,MYO15A,SCN11A,BBS4,BBS7,BBS9,ABLIM1,CHD7,EDNRB,DFNA5,ABCC6,SLC17A8,ATP8A2,KERA,TUB,TRPV2,NTSR2,EFEMP1,LOXHD1,TRPM1,AQP1,OR7D4,MYO6,PKD2L1,HOXA1,ALDH7A1,GRIN2A,TFAP2A,DIAPH1,FAM134B,MAP1A,CLN5,CDKN2D,COCH,FBXO11,CDKN1B,NOB1,NCAM2,RAE1,ZNF513,CLIC5,BFSP2,SPRY2,SLC24A2,MKKS,LAMC3,ZNF354A,HPS1,IL10,GABRR2,GJB6,GABRB2,EP…	SCN3B,BARHL1,BTBD9,CACNB2,CACNB4,CYP4V2,NR2E1,NEU1,RABGGTB,RABGGTA,SCN8A,PAX6,OR1N2,PAX3,PAX2,SCNN1G,SCNN1B,SCNN1A,C5AR1,GJA10,FXN,PIEZO2,FYN,SPTBN4,EML2,ATXN7,OPA3,OPA1,PPT1,FFAR4,GNG13,TBL1X,ADCY3,NR2F6,TBX18,ITPR3,WFS1,OBP2B,SLITRK6,AXIN1,REEP2,MC1R,OPRM1,PGAP1,OPRL1,LRTOMT,TTC8,BDKRB1,EPHB1,SOBP,TAS1R3,TH,SOD1,HPN,ADCYAP1,MYO15A,SCN11A,KCNE1,DFNB59,DLL4,BBS4,BBS5,BBS7,BBS9,NIPBL,DLG2,BBS1,BBS…	-0.403989	0.00115963	0.025185
regulation of protein modification by small protein conjugation or removal(GO:1903320)	251	592	48	16401	0.29	203	41768	0.48	BCL10,LRRK2,ANAPC1,ANAPC4,UFL1,COMMD1,CDC23,PSMA2,PSMA6,PSMA3,PSMA7,PSMB7,PSMC6,PSMD2,PSMD7,PSME1,PSME2,PSME4,FBXW7,NDFIP1,NDFIP2,TBC1D7,CLU,ABL1,WDR48,PTK2B,CDKN2A,PELI1,UBXN1,CTNNB1,LIMK1,ANAPC10,RASSF5,HSPA5,BAG5,UBQLN1,PSMB10,RPS27A,PTK2,TRIM39,HSPA1L,PSMD14,EGR1,CUL1,ZER1,SKP1,ANGPT1,SPOPL	TICAM1,NLRC3,ATG5,ATG7,BCL10,LRRK2,HDAC4,PRMT3,ANAPC1,ANAPC2,ANAPC5,ANAPC4,PIAS4,PIAS1,ANAPC7,SASH1,AVPR2,PARK7,HMG20B,UFL1,WFS1,AXIN1,MUL1,BUB1B,GTPBP4,FKBP1A,BIRC3,BIRC2,CHP1,PRKCG,UBE2C,UBE2N,COMMD1,UBE2S,RWDD3,BUB3,MTA1,HERPUD1,ADRB2,CDC16,CDC23,CDC20,CDC26,CDC27,PSMA2,PSMA1,PSMA6,PSMA5,PSMA4,PSMA3,PSMA7,PSMB5,PSMB4,PSMB7,PSMB6,PSMB1,PSMB2,MALT1,PSMB8,PSMC6,PSMC5,PSMC4,PSMC3,PSMC2,PSMC1,PSMD1…	-0.507217	0.00117313	0.0253929
organelle localization(GO:0051640)	335	617	68	16381	0.41	267	41704	0.64	LRRK2,MAPT,AP3M2,SNCA,PREB,CADPS2,SYNE2,BBS4,BBS7,AP1M2,CDC23,CLASP1,SNAP29,SNAP25,YKT6,WASL,DNM2,ACTR3,ACTR2,CLU,ARF1,TMEM106B,TMED10,MFN2,SEC23A,SEC31A,DENND1A,ASUN,AMPH,PACSIN1,STXBP1,OPHN1,ARHGAP21,COPE,CTNNB1,MAP6D1,CENPE,KIF5B,SPRY2,AURKA,RAN,MKKS,FEZ1,SYT1,MLH1,RAB27A,PTK2,BLOC1S2,PINX1,LRPPRC,CDK5RAP2,CDH3,DYNC1LI2,ITSN1,CUL3,RAB1A,RIMS1,ATP2A1,SPIRE2,PCM1,PCLO,STX5,STX7,MYH10,DPYSL2,HOOK…	GEM,BTBD9,NET1,LRRK2,HDAC6,PAX6,PARD3,ZW10,MAP4,MAP6,AP3S2,AP3S1,COPB2,NUBP1,COPB1,MAPT,ARHGEF2,COPG1,PIP5K1C,AP3M2,AP3M1,SNCA,AP3B2,AP3B1,AP3D1,SLC4A5,COPZ1,MUL1,SPICE1,MCPH1,SNPH,ARFGAP1,TH,PREB,PLXNA2,HTT,CADPS2,KLHL12,PRKCZ,DTNBP1,MTM1,SYNE2,SYNJ1,SAR1B,HHEX,BBS4,BBS5,BBS7,SEC13,CDC42,DLG4,BBS2,AP1M2,CDC23,AP1AR,CLASP1,RASGRP1,MEF2A,MARK2,SNAP29,SNAP25,YKT6,GRIK5,TACC3,TACC1,TACC2,WASL,SEC16B…	-0.433266	0.00120503	0.0259966
regulation of cellular ketone metabolic process(GO:0010565)	181	363	32	16417	0.19	149	41822	0.36	ACADM,ACADL,GCK,NR1H4,SNCA,PRKCE,PSMA2,PSMA6,PSMA3,PSMA7,PSMB7,PSMC6,PSMD2,PSMD7,PSME1,PSME2,PSME4,FOXO1,EIF2AK3,AZIN1,SREBF1,BMP5,PPARG,TYSND1,SIRT4,ANKRD26,PSMB10,ODC1,INSIG2,PSMD14,PDP2,C1QTNF2	PAX8,ACADM,ACADL,GCK,NR1H2,NR1H4,NR1H3,NR1D1,PARK7,ACADVL,NR3C1,SNCA,PTPN2,GHSR,MTOR,PRKCE,HPN,DLAT,CPT1A,IRS1,ABCD2,DKK3,PSMA2,PSMA1,PSMA6,PSMA5,PSMA4,PSMA3,PSMA7,PSMB5,PSMB4,PSMB7,PSMB6,PSMB1,PSMB2,WDR5,PSMB8,PSMC6,PSMC5,PSMC4,PSMC3,PSMC2,PSMC1,PSMD1,PSMD2,PSMD4,PSMD5,PSMD6,PSMD7,PSMD8,PSMD9,PSME1,PSME2,PSME3,PSME4,PSMF1,SOGA1,FOXO1,APOA4,APOA5,WDTC1,ATCAY,CYP7A1,PROX1,MAPK9,FAM132A,ADIPOQ,DLD,…	-0.603105	0.00121646	0.0261559
Golgi vesicle transport(GO:0048193)	243	576	46	16403	0.28	197	41774	0.47	FTL,STEAP2,SPTBN1,NRBP1,EXOC2,PREB,PICK1,KLHL20,PRKD1,AP1G1,SAR1A,RAB3IP,AP1M2,VPS41,YKT6,DNM2,LLGL1,ARF1,ARL1,VPS13A,TMED10,GOLGA1,GOLGA5,GOLGA4,GOLGA3,CLTC,DOPEY2,DOPEY1,SEC23A,SEC23B,SCFD1,SEC31A,LYPLAL1,COG6,COPE,ANK1,ANK3,GOPC,KIF16B,CLINT1,CUL3,RAB1A,RAB10,STX5,TRIP11,STX7	FTL,STEAP2,BET1,AP2A1,LYPLA1,SPTBN1,YIPF5,ZW10,COPB2,COPB1,COPG2,COPG1,AP3B2,NRBP1,COPZ1,FTH1,SLC30A6,PKDCC,SORT1,ACSL3,EXOC2,VAMP8,VAMP7,VAMP5,VAMP4,VAMP3,ARFGAP1,MPPE1,TRAPPC2L,TRAPPC12,PREB,PICK1,SNX8,SNX1,HTT,SORL1,KLHL20,PRKCI,PRKD1,KLHL12,LMF1,DTNBP1,MYO18A,AP1S3,AP1S1,AP1S2,AP1G1,SAR1B,SAR1A,CORO7,SEC13,RAB3IP,BBS1,BBS2,AP1M1,AP1M2,OSBPL5,AP1B1,AP1AR,USE1,VPS51,VPS41,SCYL1,YKT6,ARRB1,MYO1B…	-0.519752	0.0012414	0.0266037
embryonic morphogenesis(GO:0048598)	540	919	119	16330	0.72	421	41550	1	FRS2,BCL10,HDAC2,PAX2,SULF1,RSPO3,RSPO2,TBX20,CYR61,SUPT20H,SLITRK6,AR,WNT8B,ID2,COL12A1,CHRD,MYO15A,BBS4,BBS7,CDC73,CHD7,TBX3,TBX5,B9D1,SOX7,ATP8A2,MMP16,TGFB3,BMPR2,RPS6,ARID1A,MYO6,HOXA1,HOXA2,HOXA5,HOXA7,HOXA9,SP3,CTHRC1,MAPK7,MYCN,IFT122,TFAP2A,IFT88,LHX2,HNF1A,CECR2,ACVR1,EN1,ENG,ACVR2A,ACVR2B,AMOT,HIF1A,COBL,MMP9,SETDB2,CTNNB1,MYADM,WDPCP,IFT172,HOXA10,SMAD4,SMAD1,BMP7,FGF9,CLIC5,SPRY2,COL…	ENAH,FRS2,NET1,BCL10,HDAC2,HDAC1,PAX6,PAX3,PAX2,PAX8,FRZB,MDFI,ZFP36L1,FN1,GFI1,SULF1,BMPR1A,OPA1,NAGLU,HLX,RSPO3,RSPO2,IPMK,VASP,TBX20,CYR61,TBX15,TBX18,MED1,NEUROD1,SUPT20H,PAF1,SLITRK6,DSCAML1,AXIN1,MEN1,WLS,CYP26B1,HYAL1,AR,WNT9A,WNT8B,LMO4,PRKRA,TXNRD1,ID2,HIRA,COL12A1,VANGL2,EPHB2,CELSR1,EPHA2,KLF4,SOBP,TH,SOD1,PLXNB2,HTT,CHRD,HPN,POFUT2,DLC1,TGIF1,TGIF2,MYO15A,IMPAD1,JAG2,DLL1,HHEX,DLL4,BB…	-0.329616	0.00126685	0.0270595
regulation of lipid biosynthetic process(GO:0046890)	109	238	16	16433	0.1	93	41878	0.22	ACADL,NR1H4,CYR61,PLA2G6,FBXW7,APOB,CNEP1R1,PDGFB,SREBF1,BMP5,LDLR,SIRT4,PEX2,INSIG2,ATP1A1,CREBL2	DHCR7,ACADL,NR1H2,NR1H4,NR1H3,NR1D1,CTDNEP1,GFI1,ACADVL,NR3C1,NFKB1,CYR61,SCARB1,C3,ACSL3,ACSL6,PLA2G6,CYP27B1,SOD1,TSPO,MTOR,PRKCD,CREB1,ABCG1,DKK3,FBXW7,APOB,APOE,SNAI2,SNAI1,APOA4,APOA5,WDTC1,SF1,SEC14L2,CYP7A1,PROX1,MAPK9,SCAP,HTR2B,HTR2A,DDX20,STK11,VDR,AKR1C3,STAR,CNEP1R1,IGF2,PDGFB,PDGFA,WNT4,SREBF1,PTGS2,AVPR1A,BMP2,BMP5,SLC27A1,POR,AKT1,LDLR,FITM2,PLIN5,SIRT4,SIRT1,IGF1R,TCF7L2,GPLD1,SOR…	-0.824542	0.0012724	0.0270886
regulation of cell growth(GO:0001558)	326	787	66	16383	0.4	260	41711	0.62	FBLN5,CAMK2D,PTPRJ,MAPT,CYR61,AGTR1,ILK,BDKRB1,PRKCQ,IGFBP1,NDUFA13,TCHP,ENPP1,TGFB2,DCUN1D3,BMPR2,TNR,TRPV2,BMP10,ESR2,DCC,ADAM17,SFN,CAPRIN2,GDF2,RNF6,ADIPOR2,DCSTAMP,SPG20,SERTAD2,NAIF1,PTK2B,EAF2,SPOCK1,CDKN2A,CDKN2D,CDKN1B,CHPT1,FHL1,RPS6KA1,LIMK1,SMAD4,PPARD,PPARG,AKAP6,SH3BP4,RTN4,CGREF1,EI24,COL14A1,TSG101,ALOX12,GSK3B,SMARCA4,DDR1,HSPA1L,EXOSC2,SLC44A4,CDKN2AIP,SLIT2,INHBA,SUPV3L1,FLCN,C…	BARHL2,ARHGEF11,NET1,FRZB,ANAPC2,FXN,FBLN5,FN1,CAMK2D,PTPRJ,PPT1,MAPT,NRCAM,TWF2,BDNF,TAF9B,N6AMT1,CYR61,CCDC85B,DSCAM,SOCS2,WT1,MUL1,ENO1,AGTR1,ILK,CD320,F2,HYAL1,HYAL2,ACSL4,CXCL12,CIB1,CXCL16,CYBA,BDKRB1,CYP27B1,BCL6,APBB2,PLXNA3,PLXNA4,MTPN,IGFBP6,PRKCQ,HRG,HPN,IGFBP1,IGFBP2,IGFBP4,IGFBP5,NDUFA13,TCHP,PPP2CA,EBAG9,CREB3,ENPP1,WNT5A,WNT11,FAM107A,RASGRP2,SPP1,MMP14,USP47,TGFB1,TGFB2,DCUN1D3,BM…	-0.436506	0.00128316	0.0272283
purine nucleoside monophosphate catabolic process(GO:0009128)	419	1014	89	16360	0.54	330	41641	0.79	ATP6,ATF7IP,ATP5A1,MDN1,ATP5J2,ABCA3,ABCB1,ABCB4,PICK1,XRCC3,XRCC2,ENPP1,ABCG8,ABCG5,ABCF1,ABCF3,ABCE1,ABCD4,ABCC3,ABCC4,ABCC1,ABCC2,ABCC5,ABCC6,PSMC6,MSH6,MSH3,MSH2,MSH5,MSH4,VPS4A,SKIV2L,MYO10,DMC1,DDX17,DDX18,DDX10,PLS1,OLA1,ATP6V1G2,ATP6V1G1,PMS1,SWSAP1,GTF2H4,DDX23,DDX25,DDX24,DDX47,DDX49,DDX56,DDX51,POLQ,ATP13A1,ATAD2,TPM1,ATP5O,DDX39B,HSP90AA1,CENPE,KIF5B,KIF5C,KIF3C,UPF1,KIF27,KIF20A,HSPA…	ATP6,DHX8,DHX9,ATF7IP,CFTR,ATRX,SNRNP200,ABCB10,ABCB11,ATP5C1,ATP5A1,PPIF,MDN1,RALBP1,WRNIP1,ACLY,LONRF3,LONRF1,LONRF2,ATP5J2,KIF9,KIF7,KIF6,ATP5F1,ABCC11,ABCC10,YTHDC2,HPRT1,WRN,TTF2,IDE,ABCA8,ABCA7,ABCA9,ABCA2,ABCA1,ABCA3,ABCA6,ABCA5,ABCB9,ABCB8,ABCB1,ABCB7,ABCB6,ABCB4,PICK1,XRCC3,XRCC2,CHD8,CHD6,CHD5,CHD4,CHD3,RNF213,ENPP1,ABCG4,ABCG1,ABCG2,ABCG8,ABCG5,ABCF1,ABCF3,ABCF2,ABCE1,ABCD1,ABCD2,ABCD3…	-0.37621	0.00128743	0.0272295
cellular response to insulin stimulus(GO:0032869)	234	535	44	16405	0.27	190	41781	0.45	FRS2,GCK,GFPT1,GHRHR,PRKCQ,IGFBP1,ENPP1,USF1,ATP6V0D1,ATP6V0D2,FOXO1,RPS6,TBC1D4,MZB1,GAB1,ATP6V1C2,CAB39L,ATP6V1G2,ATP6V1G1,ATP6V1E1,ATP6V1E2,CRK,DENND4C,SLC2A8,LPIN1,SREBF1,RPS6KB1,EIF4G1,FGF9,EEF2K,RAF1,PPARG,PHIP,ANKRD26,VWA2,RHOQ,NCOA5,FGF20,EGR1,PIK3CB,RAB10,PRKAG1,PIK3R4,INSR	PARP1,FRS2,HDAC5,HDAC9,PAX6,GCK,PPAT,CPEB2,PDPK1,GFPT1,AP3S1,FFAR3,PPM1A,SH2B2,PTPN2,PTPN1,PAK1,PTPRE,PTPRA,ACSL6,STRADA,STRADB,IDE,GHSR,GHRHR,MTOR,PRKCA,PRKCI,PRKCD,UBE2B,PRKCB,PRKCQ,NGFR,PRKCZ,PRKDC,IGFBP1,SOS1,IRS1,ENPP1,OSBPL8,USF1,MLST8,SOGA1,CAPN10,PKLR,ATP6V0E2,ATP6V0E1,ATP6V0D1,ATP6V0D2,MYO5A,APRT,ATP6V0A1,ATP6V0A2,FOXO1,FOXO4,RPS6,TBC1D4,REPIN1,TSC1,TSC2,INPP5K,TCIRG1,WDTC1,MZB1,GAB1,ATP…	-0.527979	0.00129274	0.0272528
immune response-regulating signaling pathway(GO:0002764)	481	1401	104	16345	0.63	377	41594	0.9	CACNB3,CACNB4,FRS2,BCL10,ATF2,PAWR,FYN,FOS,PTPRJ,FCER1G,ITPR2,ELF1,MAPKAPK2,PLA2G6,CYFIP2,CHUK,PRKCH,PRKCE,PRKCQ,PRNP,YES1,IRF1,ITK,NFKBIA,ELMO2,ELMO1,EREG,MARCO,MYO1G,MYO10,WASL,PHLPP2,FOXO1,BLK,KCTD7,TESPA1,PLS1,TEC,TAB1,GAB1,ACTR3,ACTR2,CALM1,RNF31,CR2,CRK,MAPK8,MAPK7,ABL1,LY96,WASF2,LGMN,UBE2V1,CDKN1B,PELI2,PELI1,FCGR3A,PDGFB,RC3H1,UBE2D3,UBE2D2,NOD1,RPS6KA1,RPS6KA2,LIMK1,KITLG,MAPKAP1,HSP90A…	CACNB3,CACNB4,ZAP70,TICAM1,TICAM2,ENAH,FRS2,BCL10,FADD,ATF1,ATF2,SARM1,PAWR,SLA2,C5AR1,NR1H3,PDPK1,NR1D1,FYB,FYN,PHPT1,PLEKHA1,FOS,TNIP2,TNIP1,MDM2,GFI1,PTPRJ,NLRX1,PGLYRP2,MAVS,TLR10,VAV3,VAV2,VAV1,VASP,SH2B2,HCK,THEMIS2,FCER1G,FCER1A,NFKB1,NFKB2,ITPR3,ITPR1,ITPR2,KLHL6,PAG1,PTPN6,PTPN2,PAK2,PAK1,PTPRC,ELF1,CNPY3,PPP3CB,PPP3CA,MAPKAPK3,MAPKAPK2,NR4A1,PLA2G6,BIRC3,BIRC2,IRAK4,IRAK3,CYFIP2,MTOR,CH…	-0.35382	0.00131271	0.027584
response to metal ion(GO:0010038)	246	487	47	16402	0.29	199	41772	0.47	LRRK2,SCN5A,SLC25A13,FOS,CAMK2D,CAMK2B,CYBRD1,ADCY1,SNCA,ID2,PRNP,XRCC4,CA2,TTN,TAT,AQP1,CALM1,ABAT,MAPK8,ARG1,TFAP2A,PTK2B,LOXL2,SEC31A,CDKN1B,ATP7B,SDC1,CTNNB1,SLC40A1,IREB2,SERPINA1,NFATC4,NFATC3,PPARG,SYT1,HOMER1,CPS1,GSK3B,CD14,CDH1,RYR2,BNIP3,CASP8,CASR,CACYBP,PCNA,ALOX5AP	GGH,LRRK2,ATF1,SCN5A,FXN,SLC25A24,SLC25A23,SLC25A12,PPIF,SLC25A13,FOS,MDM2,CAMK2D,CAMK2B,MAOB,CYBRD1,ADCY1,SNCA,BDNF,NFKB1,ITPR3,NEUROD2,GSS,GSN,BDH1,PGAM2,PPP3CA,MTTP,ID2,MTF1,TH,FKBP1A,SOD1,SOD3,SOD2,TSPO,CHP2,HTT,PRNP,HRG,SLC18A2,IGFBP2,XRCC4,MT2A,HMOX1,CREB1,CYB5A,SLC6A1,SLC6A3,QDPR,WNT5A,ENTPD6,RASGRP2,MEF2C,MEF2A,BSG,GATM,ASCL1,GRIN1,PKLR,CA2,KRT10,TK1,TTN,FECH,ACTA1,FOSB,CCND1,TAT,AQP9,AQP…	-0.508334	0.00133734	0.0280106
myeloid cell differentiation(GO:0030099)	304	648	61	16388	0.37	243	41728	0.58	LRRK1,FOS,EXOC6,ID2,CHUK,CDC73,JAK2,NFKBIA,CA2,NDFIP1,RCOR1,RPS6,ARID4A,INPP4B,OCSTAMP,HOXA5,HOXA7,HOXA9,SP3,NME2,DCSTAMP,WDR61,PTK2B,ACVR2A,SMAP1,CDKN2B,HIF1A,SNX10,MMP9,CTNNB1,GPR68,IREB2,KITLG,SMAD5,ETS1,NCOR1,PPARG,RASSF2,BATF,ANK1,JMJD6,ANKRD54,RIPK1,CSF2,SMARCA4,KAT6A,HCLS1,PIP4K2A,APC,FLI1,HSPA1L,KLF13,HMGB2,EPAS1,PURB,PRDM16,ASXL2,INHBA,CASP3,CASP8,THPO	PARP1,FADD,LRRK1,TFE3,PRMT1,CUL4A,SFXN1,TESC,TET2,CBFA2T3,FOS,MFAP2,ADD1,ADAR,MED1,MAEA,PAF1,PTPN6,PTPN2,OSTM1,SNRK,EXOC6,NBEAL2,LMO2,CIB1,MB,IFI16,TNFSF9,ID2,EPHA2,KLF1,G6PD,BCL6,CHUK,PRKCA,L3MBTL3,L3MBTL1,IRF7,IRF8,IRF4,ATPIF1,JAG1,DLL1,HHEX,CDC42,CDC73,CREB1,JAK2,FAM20C,TIRAP,SOX6,RASGRP4,MEF2C,NFKBIA,SPI1,TGFB1,CA2,CD109,CEBPE,CEBPG,VPS33A,CAMK4,TAL1,NDFIP1,FOXO3,FECH,CSF1R,ERCC2,RCOR1,IL23A,…	-0.447565	0.00136033	0.0284001
regulation of viral process(GO:0050792)	150	456	25	16424	0.15	125	41846	0.3	APOBEC3H,APOBEC3C,PPIA,NELFE,PLS1,CCNT1,TAF11,GTF2H4,SRPK1,TRIM13,TRIM28,TRIM26,SMARCA4,TRIM35,TRIM31,SP100,TCEB1,DICER1,CDK9,POLR2H,POLR2G,POLR2F,ILF3,DERL1,CHMP2A	IFITM1,IFITM2,IFITM3,HDAC1,ADARB1,SUPT16H,APOBEC3H,APOBEC3C,PPIH,PPIA,PPID,NELFA,NELFB,NELFE,TNIP1,MAVS,VAPB,YTHDC2,ADAR,TFAP4,IFI16,SNX3,SNW1,MBL2,HPN,NR5A2,RNASEL,VPS4B,MID2,PLSCR1,HS3ST5,PM20D1,TAP2,TAP1,ERCC3,ERCC2,PLS1,INPP5K,CCNT1,TARDBP,SP1,ISG20,ISG15,PROX1,TAF11,GTF2H4,GTF2H3,GTF2H2,GTF2H1,SUPT4H1,GTF2F1,GTF2F2,TARBP2,ELL,TOP2A,DYNLT1,EIF2AK2,SSRP1,NCBP2,NCBP1,MDFIC,RSF1,OAS1,SRPK2,SRPK1…	-0.674185	0.00137793	0.0285833
regulation of behavior(GO:0050795)	150	330	25	16424	0.15	125	41846	0.3	PTPRJ,MC1R,AGER,TF,PRKD1,USP14,BMPR2,ADAM17,HOXA1,HTR1B,PTK2B,PDGFB,CCL21,CCL19,ROBO1,ROBO2,ANKRD26,THBS4,AIF1,IL16,GJA1,CXCR4,SLIT2,CASR,NRXN1	C5AR2,CAMK1D,PTPRJ,PTPRO,XCL1,PPM1F,DSCAM,PTPN2,MC1R,F7,F3,C5,CXCL12,CXCL10,MTUS1,AGER,PLA2G7,TF,PLXNA3,PLXNA4,PRKCA,PRKD1,PRKD2,HRG,DLG4,JAM3,CREB3,ADORA1,EDNRA,TIRAP,WNT5A,MEF2C,GAS6,USP14,TGFB1,BMPR2,SEMA3F,SEMA3A,TRH,IL23A,S1PR1,ADAM10,ADAM17,HOXA1,SGIP1,NTRK3,ARTN,ITGA2,SCG2,HTR1B,PTK2B,HTR2B,HTR2A,MEGF8,EDN3,EDN1,VEGFB,VEGFD,VEGFA,PTGDS,PDGFB,WNT3,GREM1,NOD2,STRA6,CCL21,CCL19,EFNB2,PDGFRA,P…	-0.674185	0.00137793	0.0285833
plasma membrane organization(GO:0007009)	216	485	40	16409	0.24	176	41795	0.42	AP2M1,SPTBN1,TSPAN15,FCER1G,AR,FLOT1,MICALL1,TGFB2,SPTB,PLS1,CLU,TM9SF1,RAMP3,DENND4C,GOLGA4,PPFIA1,CLTC,ZFYVE27,LYPLAL1,PACSIN1,SCP2,MYADM,KIF5B,ANK1,ANK3,ANO4,ANO6,GOPC,JUP,EHD3,CXCR4,RHOQ,CDH1,LDLRAP1,BAIAP2L2,RAB10,TSPAN5,MYH10,CHMP4A,NRXN1	SCN3B,ARHGEF16,MTSS1,AP2M1,PDPK1,FA2H,LYPLA1,TESC,SPTBN4,SPTBN1,MAP7,PIP5K1A,TSPAN33,TSPAN14,TSPAN15,PALM,FCER1G,DYSF,AR,PKDCC,ACSL3,CIB1,VAMP7,VAMP5,VAMP4,VAMP3,ABCA7,PPIL2,PRKG2,EPHA2,SOD1,PRKCI,PRKCZ,PLEKHF1,DLG1,BBS1,BBS2,FLOT2,FLOT1,MICALL1,BSG,GAS6,PKP3,PLSCR1,PLSCR4,PLSCR3,TGFB2,SPTB,KRT18,BIN2,MYO5A,WHAMM,PLS1,PLS3,NKD2,INPP5K,CLU,CSK,RAMP1,TM9SF1,RAMP3,RAMP2,MYRF,CALCR,MYOF,MYH2,SGIP1,AP…	-0.546658	0.00139102	0.0287193
positive regulation of growth(GO:0045927)	159	358	27	16422	0.16	132	41839	0.31	MAPT,ILK,IL7,GHRHR,IGFBP1,BBS4,CHD7,ATP8A2,TGFB2,BMPR2,TRPV2,ADAM17,SFN,PTK2B,RPS6KA1,RPS6KB1,LIMK1,AKAP6,MKKS,BASP1,ALOX12,GSK3B,EXOSC2,SLC44A4,SUPV3L1,NACA,INSR	GHR,NET1,ANAPC2,SASH3,FXN,FN1,SPTBN4,PPIB,HLX,MAPT,TWF2,PPM1F,TAF9B,N6AMT1,WFS1,DSCAM,WT1,ILK,F2,HYAL1,ACSL4,IL7,CXCL12,CIB1,CXCL16,CYBA,GHSR,GHRHR,MTPN,HPN,IGFBP1,BBS4,NIPBL,BBS2,CHD7,CREB1,SLC6A3,ATP8A2,MMP14,USP47,TGFB2,BMPR2,APOE,SEMA7A,FOXS1,SEMA4D,MYOD1,TGFBR1,TGFBR2,TRPV2,EXTL3,TAF9,ADAM10,ADAM17,SFN,SRF,SOX15,POU3F2,PROX1,INO80,RND2,NTRK3,MAP1B,PTK2B,HBEGF,DDX3X,PAFAH1B1,PLCB1,ADNP2,MEGF8…	-0.651758	0.00139337	0.0287193
cellular response to abiotic stimulus(GO:0071214)	237	553	45	16404	0.27	192	41779	0.46	SCN2A,BCL10,PAX2,PTPRK,MFAP4,MC1R,BDKRB2,TRIAP1,PRKCQ,IRF1,XRCC5,SLC6A12,YY1,TMEM161A,FNTB,FBXW7,CERS1,TRPV4,TRPM1,AQP1,CALM1,MYO6,PKD2L1,MAPK8,TP73,ENG,HUS1,OXSR1,CTNNB1,GPR68,NFATC4,MYD88,CHEK1,ATM,GSK3B,CD40,GJA1,RHOB,SLC12A6,SWI5,ATP1A1,EGR1,BNIP3,CASP8,MME	SCN2A,ADSS,NET1,BCL10,FADD,PAX2,CUL4B,PPID,MDM2,PTPRK,ARHGEF2,CLOCK,MFAP4,SNCG,PALM,NFKB1,NEUROD2,WRN,MC1R,HYAL1,HYAL2,HYAL3,IFI16,CYBA,BDKRB2,TRIAP1,TSPO,CHP1,PRKCA,PRKCQ,IRF1,XRCC5,XRCC6,KCNJ2,NIPBL,SLC6A12,FIGNL1,YY1,TMEM161A,EDNRA,SOX9,ADSSL1,USP28,USP47,FNTB,FNTA,ASCL1,FBXW7,CERS1,MAP3K14,SNAI2,BLM,RAD51AP1,TRPV4,TRPM3,TRPM1,AQP1,CALM1,ANKRD1,MYO6,PKD2L1,HABP4,MYLK,TNFRSF1A,MAPK3,MAPK9,MAPK8…	-0.515964	0.00139811	0.0287256
sexual reproduction(GO:0019953)	619	1334	139	16310	0.85	480	41491	1.14	CCT6A,CCT6B,SPATA25,SPATA24,NEU1,NR2C2,PRMT7,SGPL1,GJA10,CAMK2B,BMPR1B,ACOX1,PARN,NR2F2,AR,CATSPER2,PICK1,FUOM,ADCYAP1R1,IMMP2L,ZP2,BBS4,HERPUD2,MERTK,YY1,EDNRB,TSNAXIP1,SLC6A4,ELL3,MCM9,PSME4,MSH2,MSH4,ROS1,EREG,SYCP3,DMC1,APOB,PLAT,FOXJ1,CCNA1,RPS6,ARID4A,PMCH,TDRD7,TDRD9,HOXA9,LIG3,ABAT,ATAT1,FNDC3A,TCP11,C9orf24,IFT88,SOHLH2,LIN28A,EIF4H,NME5,WDR48,PTK2B,DDX25,CECR2,ACVR1,ASUN,ACVR2A,GMCL1,TS…	ZSCAN2,GGN,VIPAS39,CFTR,CCT6A,FANCD2,CCT6B,ATRX,SPATA20,SPATA25,SPATA24,SPATA16,NEU1,NR2C2,PRMT7,FST,SGPL1,PIAS1,GJA10,HSF2BP,CTDNEP1,NHLH2,PYGO1,PYGO2,SPTBN4,SCMH1,PLEKHA1,ZMIZ1,TUBGCP3,CAMK2B,PARK7,BMPR1B,MST1R,ADAMTS2,CLOCK,MAS1,ACOX1,RSPO1,CNBD2,UTP14C,PARN,NR2F2,TDRP,ARNTL,WT1,CYP26B1,TSPY8,PGAM2,PATZ1,CRTAP,SPIN1,SPAG16,AR,HIST1H1T,PRSS42,PRSS21,CXCL12,CIB1,CATSPER2,CATSPER3,CATSPERG,TH,BCL…	-0.305614	0.00140355	0.0287461
cell cycle phase transition(GO:0044770)	536	1303	118	16331	0.72	418	41553	1	ATF2,ANAPC1,ANAPC4,NEK6,DHFR,MDC1,XPC,TUBGCP4,CAMK2D,CAMK2B,CAMK2A,ABCB1,NEK10,ID2,TRIAP1,MBD4,LATS2,CDC73,CDC23,RBM38,PPP1CB,PSMA2,PSMA6,PSMA3,PSMA7,PSMB7,CLASP1,PSMC6,PSMD2,PSMD7,MCM6,PSME1,PSME2,PSME4,MSH2,VPS4A,CSNK1E,FBXW7,FBXL7,BID,NINL,CCNA1,RPS6,CCNE2,DNM2,TAF2,ADAM17,SPDYA,TP73,IER3,TPD52L1,KANK2,ACVR1,POLE,PPP1R12A,CDKN2A,CDKN2B,CDKN2D,CDKN1B,E2F4,E2F6,DCTN3,HUS1,LIN54,CEP78,CEP70,ZNF83…	ATF2,PRMT2,MAPRE1,CUL4A,CUL4B,ANAPC1,ANAPC2,ANAPC5,ANAPC4,ANAPC7,NEK6,PPAT,DHFR,MDC1,ZW10,XPC,MDM2,CAMK2G,TUBGCP4,TUBGCP3,TUBGCP6,CAMK2D,HINFP,CAMK2B,GFI1,CAMK2A,TUBGCP2,MEPCE,PPM1D,SMC5,ENSA,PTPN6,BUB1B,MELK,PTPRC,ZWINT,WNT9A,PPP3CA,KNTC1,PRCC,MUC1,ABCB1,PLRG1,NEK10,NEK11,ID2,TRIAP1,MTBP,NSMCE2,MBD4,KLHL22,UBE2C,PRKDC,TCF3,LATS1,LATS2,BUB1,FBXW11,BUB3,PRKAR2B,MTA3,WEE1,KCNA5,DLG1,CDC5L,CHFR,CDC7…	-0.330892	0.00142508	0.0290951
cellular response to lipid(GO:0071396)	345	803	71	16378	0.43	274	41697	0.65	NR2C2,PAX2,NR1H4,NR1I3,NR1I2,ADCY6,NR2F2,AR,WNT8B,NR4A2,PRKCE,XRCC5,MSTN,NDUFA13,CDC73,EDNRB,ZCCHC11,SLC6A4,CMPK2,NFKBIA,APOB,PLAT,ESR2,AQP1,AKAP13,OCSTAMP,HOXA1,HOXA2,RAMP3,TNFRSF1B,MAPK8,ARG1,ABL1,LY96,NME2,PTK2B,ACVR1,NR0B2,ESRRG,FBXO32,SREBF1,CCL20,BMP7,SERPINB9,MYD88,PPARD,PPARG,CPS1,ALOX12,CSF2,AXL,LRP8,IL15,IL10,OSR1,CD40,CD55,CD14,TRIM63,HMGB2,FLT3,ATP1A1,NR6A1,EGR1,INHBA,CASR,DGAT2,PDE4D…	TICAM1,TICAM2,NR2E1,NR2C2,NR2C1,PAX6,PAX2,NR1H2,NR1H4,NR1H3,SASH1,NR1I3,NR1I2,NR1D1,NR1D2,TESC,TNIP2,NLRP3,MDM2,GFI1,FFAR3,TWF2,NR3C2,NR3C1,HCK,ADCY6,CYP26A1,ADD1,NFKB1,NR2F6,NR2F2,NR2F1,MED1,PAF1,TFAP4,SCARB1,CYP26B1,SGMS1,AR,WNT9A,WNT8B,CXCL10,ABCA1,NR4A2,NR4A1,CXCL16,EPHA3,MTDH,CYP27B1,TSPO,SNW1,IRAK2,PRKCA,IRAK1,PRKCE,IRF8,IRF3,XRCC5,HMGCS1,ADCYAP1,MSTN,NDUFA13,CPT1A,NR5A2,CDC73,MSX2,OSBPL7,S…	-0.415958	0.00143342	0.0291732
leukocyte chemotaxis(GO:0030595)	126	294	20	16429	0.12	106	41865	0.25	PTPRJ,FCER1G,EDNRB,TGFB2,ADAM17,ITGA9,PTK2B,PDGFB,CCL21,CCL19,ANO6,THBS4,AIF1,IL16,IL10,CXCR4,FLT1,SLIT2,PDE4D,CXADR	C5AR2,C5AR1,CAMK1D,PTPRJ,PTPRO,ARHGEF5,VAV3,VAV1,XCL1,PIP5K1C,FCER1G,F7,C5,CXCL11,CXCL12,CXCL10,MTUS1,CXCL16,PLA2G7,PRKCA,JAM3,CREB3,EDNRA,EDNRB,TIRAP,WNT5A,SPP1,GAS6,TGFB2,MYO9B,CSF3R,SYK,IL23A,TRPM4,NUP85,LGALS3,ADAM10,ADAM17,ITGB2,ITGAM,ITGA1,ITGA9,CORO1A,SCG2,PTK2B,LYST,PREX1,EDN3,EDN1,VEGFB,VEGFD,VEGFA,PDGFB,GREM1,SLC37A4,NOD2,CCL21,CCL19,PF4,S100A9,SERPINE1,RAC2,RAC1,HRH1,RPS19,CMKLR1,ANO6,…	-0.732305	0.00146345	0.0296911
glycerophospholipid metabolic process(GO:0006650)	262	732	51	16398	0.31	211	41760	0.5	PIP5KL1,AGPAT1,PLA2G6,HADHA,HADHB,LCLAT1,ENPP2,PLEK,PLBD1,PLS1,APOA2,INPP4B,DBI,GPCPD1,SERINC5,SERINC1,ARF1,ARF3,FAM135A,DPM2,LPIN1,INPP1,MTMR6,GPAT3,PDGFB,CHPT1,PI4K2A,PIGK,PIGL,PIGF,PIGC,PIGV,PIGP,LDLR,MBOAT2,CRLS1,ATM,PIK3C2G,LCAT,PIP4K2A,PEMT,SLC44A1,SLC44A2,SLC44A4,SLC44A5,CDS2,PIK3CB,PLA2G16,PLA2G15,DGAT2,PIK3R4	PIP5KL1,ACP6,ACHE,SMG1,PIP5K1B,PIP5K1C,PIP5K1A,PHOSPHO1,SCARB1,PGAP3,PGAP2,PGAP1,MTMR14,ACSL3,MPPE1,CHKA,CHKB,AGPAT5,AGPAT4,AGPAT3,AGPAT1,PLA2G6,PLA2G5,MTM1,HADHA,HADHB,SYNJ1,SYNJ2,IMPAD1,LCLAT1,ENPP2,PLSCR1,PLD3,PLD2,PLD1,PLD4,PLEK,CSF1R,PLBD1,ETNK1,ETNK2,STOML2,PLS1,PLAUR,APOA4,APOA2,BPNT1,TAZ,PCYT2,INPP4B,INPP4A,INPP5K,INPP5J,INPP5F,INPP5E,INPP5D,INPP5B,INPP5A,DBI,GPCPD1,SERINC3,SERINC2,SERINC…	-0.485253	0.00148915	0.0301181
purine ribonucleoside monophosphate catabolic process(GO:0009169)	418	1013	89	16360	0.54	329	41642	0.78	ATP6,ATF7IP,ATP5A1,MDN1,ATP5J2,ABCA3,ABCB1,ABCB4,PICK1,XRCC3,XRCC2,ENPP1,ABCG8,ABCG5,ABCF1,ABCF3,ABCE1,ABCD4,ABCC3,ABCC4,ABCC1,ABCC2,ABCC5,ABCC6,PSMC6,MSH6,MSH3,MSH2,MSH5,MSH4,VPS4A,SKIV2L,MYO10,DMC1,DDX17,DDX18,DDX10,PLS1,OLA1,ATP6V1G2,ATP6V1G1,PMS1,SWSAP1,GTF2H4,DDX23,DDX25,DDX24,DDX47,DDX49,DDX56,DDX51,POLQ,ATP13A1,ATAD2,TPM1,ATP5O,DDX39B,HSP90AA1,CENPE,KIF5B,KIF5C,KIF3C,UPF1,KIF27,KIF20A,HSPA…	ATP6,DHX8,DHX9,ATF7IP,CFTR,ATRX,SNRNP200,ABCB10,ABCB11,ATP5C1,ATP5A1,PPIF,MDN1,RALBP1,WRNIP1,ACLY,LONRF3,LONRF1,LONRF2,ATP5J2,KIF9,KIF7,KIF6,ATP5F1,ABCC11,ABCC10,YTHDC2,HPRT1,WRN,TTF2,IDE,ABCA8,ABCA7,ABCA9,ABCA2,ABCA1,ABCA3,ABCA6,ABCA5,ABCB9,ABCB8,ABCB1,ABCB7,ABCB6,ABCB4,PICK1,XRCC3,XRCC2,CHD8,CHD6,CHD5,CHD4,CHD3,RNF213,ENPP1,ABCG4,ABCG1,ABCG2,ABCG8,ABCG5,ABCF1,ABCF3,ABCF2,ABCE1,ABCD1,ABCD2,ABCD3…	-0.373151	0.00152079	0.0304724
ribonucleoside monophosphate catabolic process(GO:0009158)	418	1013	89	16360	0.54	329	41642	0.78	ATP6,ATF7IP,ATP5A1,MDN1,ATP5J2,ABCA3,ABCB1,ABCB4,PICK1,XRCC3,XRCC2,ENPP1,ABCG8,ABCG5,ABCF1,ABCF3,ABCE1,ABCD4,ABCC3,ABCC4,ABCC1,ABCC2,ABCC5,ABCC6,PSMC6,MSH6,MSH3,MSH2,MSH5,MSH4,VPS4A,SKIV2L,MYO10,DMC1,DDX17,DDX18,DDX10,PLS1,OLA1,ATP6V1G2,ATP6V1G1,PMS1,SWSAP1,GTF2H4,DDX23,DDX25,DDX24,DDX47,DDX49,DDX56,DDX51,POLQ,ATP13A1,ATAD2,TPM1,ATP5O,DDX39B,HSP90AA1,CENPE,KIF5B,KIF5C,KIF3C,UPF1,KIF27,KIF20A,HSPA…	ATP6,DHX8,DHX9,ATF7IP,CFTR,ATRX,SNRNP200,ABCB10,ABCB11,ATP5C1,ATP5A1,PPIF,MDN1,RALBP1,WRNIP1,ACLY,LONRF3,LONRF1,LONRF2,ATP5J2,KIF9,KIF7,KIF6,ATP5F1,ABCC11,ABCC10,YTHDC2,HPRT1,WRN,TTF2,IDE,ABCA8,ABCA7,ABCA9,ABCA2,ABCA1,ABCA3,ABCA6,ABCA5,ABCB9,ABCB8,ABCB1,ABCB7,ABCB6,ABCB4,PICK1,XRCC3,XRCC2,CHD8,CHD6,CHD5,CHD4,CHD3,RNF213,ENPP1,ABCG4,ABCG1,ABCG2,ABCG8,ABCG5,ABCF1,ABCF3,ABCF2,ABCE1,ABCD1,ABCD2,ABCD3…	-0.373151	0.00152079	0.0304724
cell junction assembly(GO:0034329)	219	559	41	16408	0.25	178	41793	0.42	ITGB1BP1,PTPRJ,PTPRK,ARHGEF6,PARD6A,ILK,PRKCH,UGT8,PLEC,TRPV4,VMP1,TEK,RAPGEF2,ARHGAP6,MARVELD3,F11R,DST,PTK2B,AMOT,CTNNB1,CTNNA1,COL17A1,WDPCP,PXN,ROCK1,ROCK2,CLDN14,TLN2,JUP,PTK2,CADM2,GJA1,APC,CDH1,CDH3,CDH5,TJP1,DAPK3,EPB41L5,CDH18,FLCN	PARVB,PARVA,HDAC7,PDPK1,PARD3,FN1,ITGB1BP1,PTPRJ,PTPRK,PTPRO,ARHGEF7,ARHGEF6,PIP5K1C,PIP5K1A,VASP,PPM1F,PARD6A,PARD6B,PARD6G,ILK,EPHA3,MTDH,PRKCA,PRKCI,PRKCH,HRG,DLC1,FBLIM1,DLG5,DLG1,UGT8,MICALL2,WNT11,PKP2,PKP3,PKP4,MMP14,MYO1C,PKN2,TBCD,CD9,APOD,CD151,PLEC,SNAI2,SNAI1,WHAMM,NFASC,TRPV4,VMP1,ACTN4,ACTN1,ACTN2,ACTN3,TEK,TSC1,RAPGEF2,RAPGEF1,CGN,SRF,SRC,ARHGAP6,RAMP2,MARVELD2,MARVELD3,MYOC,TESK1,…	-0.533252	0.0015177	0.0304724
negative regulation of endopeptidase activity(GO:0010951)	180	548	32	16417	0.19	148	41823	0.35	TFPI,PAX2,SNCA,TRIAP1,CYTB,C4A,USP14,AQP1,SFN,NLE1,UCHL5,SPOCK1,CDKN2D,RPS6KA1,DHCR24,SERPINE3,SERPINI2,SERPINA5,SERPINA3,SERPINA1,SERPINB9,SERPINC1,RAF1,TNFAIP8,SPINK6,CRB2,PTTG1,SERPINA10,SERPINA11,TIMP4,ANXA8,RFFL	TFPI,PAX2,MDM2,PARK7,HGF,SNCA,CST9L,PAK2,GPI,PCID2,WNT9A,C3,C5,NR4A1,IFI16,KLF4,TRIAP1,WFIKKN1,BIRC6,SORL1,HRG,HERPUD1,SEBOX,PEBP1,CYTB,PSMF1,C4A,SPP2,FNIP1,GAS6,USP14,USP47,ARRB2,ARRB1,CD109,WFDC12,LAMTOR5,ITIH1,ITIH4,ITIH2,ITIH3,BCL2L12,RENBP,AQP1,SFN,RNF34,SRC,NLE1,TFAP2B,IFI6,PROS1,XIAP,DDX3X,UCHL5,SIAH2,SPOCK1,CDKN2D,APLP2,VEGFA,VIL1,AMBP,WFDC1,WFDC2,WFDC3,SH3RF1,RPS6KA3,RPS6KA1,PRDX5,PRDX3,…	-0.596347	0.00154273	0.0308165
regulation of neuron differentiation(GO:0045664)	434	806	93	16356	0.57	341	41630	0.81	LRRK2,HDAC2,ZFHX3,FYN,CFL2,CAMK2B,MAPT,ADCY6,PTPRD,ILK,LZTS1,TTC3,ID2,XK,EPHB3,FKBP1B,CHN1,FUOM,PRKD1,EDNRB,TENM3,SLC6A4,ATP8A2,SNAP25,IL15RA,BMPR2,FOXA1,TNR,TRPV2,TRPV4,HEY2,DCC,PDLIM5,RAPGEF2,LGALS1,ACTR3,CAPRIN2,HOXA2,TP73,TFAP2A,FKBP4,RNF6,SSH2,LIN28A,NME2,SPG20,PTK2B,STK24,NKX2-2,SPOCK1,PRKCSH,PACSIN1,COBL,TMEM30A,LIMK1,KIDINS220,SMAD1,BMP7,BMP5,NPTN,ROBO1,ROBO2,GPRC5B,RTN4,FEZ1,KIF13B,RGS6,…	BARHL2,SCN1B,GFAP,KNDC1,NR2E1,NET1,LRRK2,ATF1,ARHGDIA,SARM1,HDAC2,PAX6,ANAPC2,ZFHX3,CPEB3,FYN,FN1,CBFA2T2,CFL2,CAMK1D,CAMK2B,GFI1,NEFM,PTPRG,HMG20A,HMG20B,PTPRO,HGF,MAPT,ARHGEF1,NRCAM,TWF2,ACHE,ADCY6,BDNF,PALM,NR2F1,MED1,NEUROD2,NEUROD1,DSCAM,PAK3,SCARF1,PTPRD,ILK,LZTS1,ACSL6,CXCL12,CIB1,BEND6,STMN2,TTC3,AVIL,KLK6,KLK8,ID2,XK,EPHB3,EPHB2,EPHA3,EPHA4,FKBP1B,BCL6,CHN1,PLXNA3,PLXNA4,PLXNB1,PLXNB2,FU…	-0.365057	0.0015478	0.0308226
cell junction organization(GO:0034330)	253	606	49	16400	0.3	204	41767	0.49	ITGB1BP1,PTPRJ,PTPRK,ARHGEF6,PARD6A,ILK,PRKCH,UGT8,TGFB3,TGFB2,PLEC,TRPV4,VMP1,TEK,RAPGEF2,ARHGAP6,XIRP2,MARVELD3,NLGN4X,F11R,DST,PTK2B,AMOT,CTNNB1,CTNNA1,COL17A1,WDPCP,PXN,ROCK1,ROCK2,CLDN14,TLN2,JUP,PTK2,CCM2,CADM2,GJA1,APC,CDH1,CDH3,CDH5,TJP1,DAPK3,EPB41L5,CDH18,RAB8B,FLCN,MPZ,CXADR	PARVB,PARVA,MTSS1,HDAC7,PDPK1,PARD3,FN1,PLEKHA7,ITGB1BP1,PTPRJ,PTPRK,PTPRO,ARHGEF7,ARHGEF6,PIP5K1C,PIP5K1A,VASP,PPM1F,PARD6A,PARD6B,PARD6G,ILK,EPHA3,MTDH,PRKCA,PRKCI,PRKCH,HRG,DLC1,FBLIM1,CDC42,DLG5,DLG1,UGT8,MICALL2,WNT11,PKP2,PKP3,PKP4,MMP14,TGFB3,TGFB1,TGFB2,MYO1C,PKN2,TBCD,CD9,APOD,CD151,PLEC,SNAI2,SNAI1,CSF1R,WHAMM,NFASC,KIFC3,TRPV4,VMP1,ACTN4,ACTN1,ACTN2,ACTN3,TEK,TSC1,RAPGEF2,RAPGEF1,CGN,S…	-0.491474	0.00156725	0.0310191
striated muscle cell differentiation(GO:0051146)	253	414	49	16400	0.3	204	41767	0.49	CACNB4,HDAC2,ACADM,AFG3L2,ZFHX3,NEO1,CFL2,CAMK2D,ILK,WNT8A,NEURL2,XK,CHUK,RBM38,TBX3,TBX5,TRDN,HIF1AN,TTN,CFLAR,BMP10,HEY2,DNER,XIRP1,IFT88,ACVR1,TPM1,IGF1,SDC1,CAPZB,KIAA1161,GATA6,GATA4,AKAP6,HOMER1,COL14A1,EZH2,GSK3B,POPDC2,SPAG9,DICER1,CDON,TANC1,CACYBP,NACA,MYH11,MYH10,CXADR,CBY1	CACNB4,ATG5,ATG7,HDAC5,HDAC4,HDAC2,HDAC9,ACADM,NEXN,MAML1,AFG3L2,ZFHX3,NEO1,NEBL,CFL2,CAMK2D,WT1,BVES,CYP26B1,ILK,SORT1,PPP3CA,WNT8A,LMNA,CXCL12,CXCL10,NEURL2,CXCL14,ID3,XK,WFIKKN1,BCL9,TMTC3,MTPN,MTOR,CHUK,KLHL40,KLHL41,IGFBP5,MYO18B,KCNH1,PRKAR1A,PITX2,SMYD3,RBM38,SPEG,RBM24,TBX3,TBX5,TBX1,DKK1,SOX6,SOX9,SOX8,MEF2C,MEF2A,TGFB1,HACD1,TRDN,KRT19,BIN3,HIF1AN,MYOD1,TTN,MYOCD,CFLAR,BOC,ACTA1,ACTC1,B…	-0.491474	0.00156725	0.0310191
nucleoside monophosphate catabolic process(GO:0009125)	421	1018	90	16359	0.55	331	41640	0.79	ATP6,ATF7IP,ATP5A1,MDN1,ATP5J2,ABCA3,ABCB1,ABCB4,PICK1,XRCC3,XRCC2,ENPP1,ABCG8,ABCG5,ABCF1,ABCF3,ABCE1,ABCD4,ABCC3,ABCC4,ABCC1,ABCC2,ABCC5,ABCC6,PSMC6,MSH6,MSH3,MSH2,MSH5,MSH4,VPS4A,SKIV2L,MYO10,DMC1,DDX17,DDX18,DDX10,PLS1,OLA1,ATP6V1G2,ATP6V1G1,PMS1,SWSAP1,GTF2H4,DDX23,DDX25,DDX24,DDX47,DDX49,DDX56,DDX51,POLQ,ATP13A1,ATAD2,TPM1,ATP5O,DDX39B,HSP90AA1,CENPE,KIF5B,KIF5C,KIF3C,UPF1,KIF27,KIF20A,HSPA…	ATP6,DHX8,DHX9,ATF7IP,CFTR,ATRX,SNRNP200,ABCB10,ABCB11,ATP5C1,ATP5A1,PPIF,MDN1,RALBP1,WRNIP1,ACLY,LONRF3,LONRF1,LONRF2,ATP5J2,KIF9,KIF7,KIF6,ATP5F1,ABCC11,ABCC10,YTHDC2,HPRT1,WRN,TTF2,IDE,ABCA8,ABCA7,ABCA9,ABCA2,ABCA1,ABCA3,ABCA6,ABCA5,ABCB9,ABCB8,ABCB1,ABCB7,ABCB6,ABCB4,PICK1,XRCC3,XRCC2,CHD8,CHD6,CHD5,CHD4,CHD3,RNF213,ENPP1,ABCG4,ABCG1,ABCG2,ABCG8,ABCG5,ABCF1,ABCF3,ABCF2,ABCE1,ABCD1,ABCD2,ABCD3…	-0.368026	0.00159369	0.0314463
proteasomal protein catabolic process(GO:0010498)	328	736	67	16382	0.41	261	41710	0.62	LRRK2,WWP2,WWP1,ANAPC1,ANAPC4,ATXN3,UFL1,ERLEC1,SUMO1,SOCS5,KLHL20,UBE2W,COMMD1,KLHL42,BBS7,CDC23,PSMA2,PSMA6,PSMA3,PSMA7,PSMB7,PSMC6,PSMD2,PSMD7,PSME1,PSME2,PSME4,USP14,CSNK1E,FBXW7,FBXL7,FBXL3,ERLIN1,ATRAID,CLU,RNF5,UCHL5,UBE2J1,DYX1C1,UBXN1,OPHN1,UBE2D3,RFWD2,ANAPC10,AURKA,YOD1,HSPA5,BAG5,BAG6,UBQLN1,PSMB10,TRIM13,GSK3B,RPS27A,TRIM63,TRIB2,PTTG1,PSMD14,DERL1,CUL3,CUL1,DNAJB9,PMAIP1,SKP1,SPOPL,…	ENC1,LRRK2,CUL4A,FAF1,NELL1,WWP2,WWP1,ANAPC1,ANAPC2,ANAPC5,ANAPC4,PIAS1,ANAPC7,NR1D1,XBP1,SEC61B,MDM2,PARK7,ATXN3,NPLOC4,CLOCK,UFL1,TBL1X,ERLEC1,SUMO2,SUMO1,WFS1,SOCS6,SOCS4,SOCS5,ARNTL,AXIN1,BUB1B,FOXRED2,BIRC2,KLHL20,UBE2I,UBE2C,UBE2B,UBE2K,UBE2W,COMMD1,UBE2S,KLHL42,UBE4B,PPP2CB,KCNE2,FBXW11,BUB3,MTA1,BBS7,CDC16,CDC34,C2orf40,OSBPL7,CDC23,CDC20,CDC26,CDC27,PSMA2,PSMA1,PSMA6,PSMA5,PSMA4,PSMA3,PS…	-0.42527	0.00164411	0.0322024
lipid transport(GO:0006869)	244	668	47	16402	0.29	197	41774	0.47	NEU1,SIGMAR1,PLEKHA8,BDKRB2,TRIAP1,PLA2G6,PLA2R1,MSR1,OSBPL3,OSBPL9,ABCG8,ABCG5,ABCC2,ATP8A2,NFKBIA,APOB,APOM,PLTP,APOA2,CLU,HNF1A,POMC,STARD5,TMEM30A,SCP2,SLC27A2,SLC27A5,SLC27A4,NPC2,LDLR,SERPINA5,OSBPL10,NCOR1,PPARD,PPARG,PLIN2,GOT2,CPT2,ATP10B,LCAT,APOLD1,LDLRAP1,CROT,GLTP,INHBA,HNRNPK,NUS1	KISS1R,CFTR,NEU1,NR1H2,NR1H3,SIGMAR1,SLC25A20,PLEKHA8,SLC25A17,ESYT2,ESYT1,ESYT3,NFKB1,SCARB1,ACSL1,ACSL4,ACSL3,ACSL6,MTTP,VAMP7,ABCA7,ABCA2,ABCA1,ABCA5,CHKA,BDKRB2,TRIAP1,PLA2G6,PLA2G5,TSPO,GLTPD2,SORL1,PRKCD,PLA2R1,MSR1,SOAT1,SOAT2,CPT1B,CPT1A,PSAP,OSBPL5,OSBPL2,OSBPL3,OSBPL8,OSBPL9,OSBPL6,MCAT,OSBPL7,ABCG1,ABCG8,ABCG5,ABCD1,ABCC2,ATP8B1,ATP8B2,ATP8B3,ATP8A2,CYP4F2,ATP8A1,VPS51,VPS4B,NFKBIA,APO…	-0.498185	0.00164694	0.0322024
anatomical structure homeostasis(GO:0060249)	244	588	47	16402	0.29	197	41774	0.47	POT1,LRRK1,CFL2,ACP5,SMC6,IL7,TF,XRCC5,BBS4,VPS54,CA2,ERCC4,DCSTAMP,HNF1A,PTK2B,TERF2,POLE,STN1,TPP1,HIF1A,ZNF830,CTNNB1,SERPINA3,FGGY,MKKS,RAD51D,HOMER1,ATM,COL14A1,LCA5,ACD,SP100,PINX1,APC,NPHP3,EPAS1,POLD3,POLD2,YLPM1,CDH3,LYZ,PCNA,CXADR,RFC3,RFC2,GCNT2,TINF2	PARP3,PARP1,POT1,ATRX,LRRK1,GAA,TNKS1BP1,SASH3,TERT,CFL2,PBLD,TEP1,ACP5,SMG6,SMC5,SMC6,ADD1,NEUROD1,WRN,FH,IL7,MUC4,DKC1,NSMCE2,TF,SOD1,TNKS2,PRKDC,MTM1,XRCC5,XRCC6,BBS4,BBS1,BBS2,ADRB2,COL11A2,SOX9,VPS54,SPP1,FEN1,CA2,CD7,FBXO4,MRE11,BLM,CSF1R,RPA3,RPA1,RPA2,ERCC6,ERCC4,ERCC1,SYK,DNA2,INPP5D,S1PR1,SRF,SRC,CSK,LIPA,LIG1,P2RX4,P2RX7,DMD,ILDR2,ITGB3,ITGB1,CORO1A,PCDH15,DCSTAMP,HNF1A,WDR36,PTK2B,STK…	-0.498185	0.00164694	0.0322024
monovalent inorganic cation homeostasis(GO:0055067)	93	182	13	16436	0.08	80	41891	0.19	NEU1,SCN7A,CAMK2D,AGTR1,EDNRB,CA7,CA2,CLN5,SLC4A10,FASLG,SLC9A9,SLC9A5,ATP1A1	CFTR,NEU1,SCN7A,SCNN1G,SCNN1B,SCNN1A,AVPR2,CAMK2D,PPT1,NR3C2,SLC4A3,MAFG,AGTR1,C7,CHP1,KCNJ2,KCNH2,KCNA5,CORIN,ADORA1,EDNRB,RAB39A,CYP4F2,GPR89B,CA7,CA2,ATP6V0E2,ATP6V0E1,TFAP2B,CLCN3,CLN3,CLN5,CLN6,SLAMF8,EDN1,ATP5B,ATP4A,SLC26A3,SLC26A6,SLC26A9,SLC4A10,OTC,COMT,AVPR1A,ATP6V1H,FASLG,AQP11,CLIC4,KCNJ10,NPPB,NPR1,ATP6AP1,NEDD4L,SLC11A1,AGT,SLC9A9,SLC9A8,SLC9A7,SLC9A6,SLC9A5,SLC9A3,SLC9A2,SLC9A1,KN…	-0.88148	0.00169263	0.0329961
regulation of apoptotic signaling pathway(GO:2001233)	385	826	81	16368	0.49	304	41667	0.72	HIGD1A,BCL10,HDAC2,STEAP3,FYN,CAMK2B,BMPR1B,PARL,VDAC2,AR,PPP3CC,IL7,BDKRB2,TRIAP1,PLA2G6,DEPTOR,NDUFA13,JAK2,TMEM161A,DFNA5,ELL3,DNM1L,VNN1,TGFB2,FBXW7,BID,CFLAR,SFN,CLU,CTH,NLE1,MAPK8,MAPK7,TP73,IER3,G2E3,TPD52L1,NME5,ACVR1,TPT1,EIF2AK3,IGF1,CDKN2D,HIF1A,FBXO18,CTNNB1,CTNNA1,RPS6KB1,TRADD,BMP5,FASLG,MOAP1,NFATC4,RAF1,PHIP,YWHAQ,PDIA3,APOPT1,BAG5,UBQLN1,MAP3K7,EI24,RIPK1,CSF2,GSK3B,TRIM39,SP100,…	HIGD1A,ACAA2,PPP1CA,BCL10,FADD,HDAC2,FAF1,WWOX,PIAS4,STEAP3,FXN,FYN,PPIF,TERT,CAMK2B,PARK7,BMPR1B,OPA1,HGF,ARHGEF2,TAF9B,PARL,WFS1,MADD,TFAP4,MUL1,PAK2,PTPRC,SGMS1,PEA15,VDAC2,PGAP2,HYAL2,AR,PPP3CC,ACSL5,IL7,LMNA,STRADB,CXCL12,PRKRA,MUC1,BDKRB2,TRIAP1,DEDD2,PLA2G6,BIRC6,SOD1,SOD2,HTT,PRKCD,NGFR,FAIM2,MAGED1,ATPIF1,DEPTOR,NDUFA13,BUB1,PLEKHF1,UNC5B,FIGNL1,HMOX1,JAK2,JAK3,APAF1,TMEM161A,CYLD,DFNA5,…	-0.388197	0.00172505	0.0334267
cell cycle checkpoint(GO:0000075)	269	766	53	16396	0.32	216	41755	0.51	ATF2,ANAPC1,ANAPC4,NEK6,MDC1,XPC,MAPKAPK2,TRIAP1,MBD4,XRCC3,CDC23,RBM38,PSMA2,PSMA6,PSMA3,PSMA7,PSMB7,PSMC6,PSMD2,PSMD7,PSME1,PSME2,PSME4,MSH2,VPS4A,BRE,RPS6,CCNE2,TP73,IER3,TAOK1,CDKN2B,CDKN1B,HUS1,ZNF830,RFWD2,DDX39B,ANAPC10,AURKA,FAM175A,CHEK1,PSMB10,ATM,THOC1,RPS27L,RPS27A,RNASEH2B,APC,CDK5RAP2,TIPRL,PSMD14,PCNA,NAE1	ATF2,CUL4A,ANAPC1,ANAPC2,ANAPC5,ANAPC4,ANAPC7,NEK6,MDC1,ZW10,XPC,MDM2,HINFP,CLOCK,BUB1B,PCID2,ZWINT,PEA15,WNT9A,KNTC1,PRCC,MAPKAPK2,MUC1,NEK11,TRIAP1,MTBP,MBD4,KLHL22,UBE2C,PRKDC,XRCC3,BUB1,BUB3,UIMC1,DLG1,CDC5L,CHFR,CDC16,CDC23,CDC20,CDC26,CDC27,RBM38,PSMA2,PSMA1,PSMA6,PSMA5,PSMA4,PSMA3,PSMA7,PSMB5,PSMB4,PSMB7,PSMB6,PSMB1,PSMB2,PSMB8,PSMC6,PSMC5,PSMC4,PSMC3,PSMC2,PSMC1,PSMD1,PSMD2,PSMD4,PSMD5,PS…	-0.470205	0.00172377	0.0334267
mitotic cell cycle phase transition(GO:0044772)	525	1273	116	16333	0.71	409	41562	0.97	ATF2,ANAPC1,ANAPC4,NEK6,DHFR,MDC1,XPC,TUBGCP4,CAMK2D,CAMK2B,CAMK2A,ABCB1,ID2,TRIAP1,MBD4,LATS2,CDC73,CDC23,RBM38,PPP1CB,PSMA2,PSMA6,PSMA3,PSMA7,PSMB7,CLASP1,PSMC6,PSMD2,PSMD7,MCM6,PSME1,PSME2,PSME4,MSH2,VPS4A,CSNK1E,FBXL7,BID,NINL,CCNA1,RPS6,CCNE2,DNM2,TAF2,ADAM17,SPDYA,TP73,IER3,TPD52L1,KANK2,ACVR1,POLE,PPP1R12A,CDKN2A,CDKN2B,CDKN2D,CDKN1B,E2F4,E2F6,DCTN3,HUS1,LIN54,CEP78,CEP70,ZNF830,RRM2,FHL1,…	ATF2,PRMT2,MAPRE1,CUL4A,CUL4B,ANAPC1,ANAPC2,ANAPC5,ANAPC4,ANAPC7,NEK6,PPAT,DHFR,MDC1,ZW10,XPC,MDM2,CAMK2G,TUBGCP4,TUBGCP3,TUBGCP6,CAMK2D,HINFP,CAMK2B,GFI1,CAMK2A,TUBGCP2,MEPCE,PPM1D,SMC5,ENSA,PTPN6,BUB1B,MELK,ZWINT,WNT9A,PPP3CA,KNTC1,PRCC,MUC1,ABCB1,PLRG1,NEK11,ID2,TRIAP1,MTBP,NSMCE2,MBD4,KLHL22,UBE2C,PRKDC,TCF3,LATS1,LATS2,BUB1,FBXW11,BUB3,PRKAR2B,MTA3,WEE1,KCNA5,DLG1,CHFR,CDC73,CDC16,CDC34,CDC2…	-0.326126	0.00178293	0.0342217
regulation of cellular component size(GO:0032535)	248	548	48	16401	0.29	200	41771	0.48	SPTBN1,CFL2,MAPT,SH3BGRL3,SPTAN1,ILK,XK,PICK1,PRKCE,DEPTOR,JMY,SPTB,BMPR2,PLEK,TNR,TRPV2,DCC,ACTR3,ACTR2,ARHGAP5,ARF1,ABI2,TP73,RNF6,SSH2,SPG20,PTK2B,ELN,EVL,AMOT,E2F4,MYADM,CCL21,LIMK1,CAPZB,RTN4,RDX,GSK3B,HCLS1,SLIT2,PDXP,TRIOBP,RAB3B,ULK1,ULK2,ARPC5L,NEB,LMOD2	BARHL2,NET1,ANAPC2,FN1,SPTBN5,SPTBN4,SPTBN2,SPTBN1,CFL2,NEFM,PECAM1,MAPT,CAPZA2,CAPZA1,NRCAM,TWF1,TWF2,VASP,HCK,SH3BGRL3,BDNF,ADD2,ADD1,DSCAM,PAK3,GSN,SPTAN1,ILK,CXCL12,SPECC1L,AVIL,XK,PLXNA3,PLXNA4,PICK1,MTPN,MTOR,PRKCE,PRKCD,DEPTOR,LATS1,JMY,PLEKHH2,DLG1,CREB1,AP1AR,TENM1,WNT5A,SPP1,MLST8,SPTB,BMPR2,APOE,SEMA7A,LAMTOR5,SEMA3F,SEMA3A,SEMA4F,SEMA4D,PLEK,TTL,WHAMM,TNR,TRPV2,KIRREL,AKT1S1,TSC1,TSC2…	-0.492256	0.00178723	0.0342217
glycerolipid biosynthetic process(GO:0045017)	248	647	48	16401	0.29	200	41771	0.48	AGPAT1,PLA2G6,HADHA,HADHB,ELOVL4,ELOVL2,LCLAT1,FBXW7,PLBD1,PLS1,APOA2,INPP4B,GPCPD1,ARF1,ARF3,DPM2,LPIN1,CNEP1R1,MTMR6,GPAT3,PDGFB,CHPT1,SREBF1,PI4K2A,PIGK,PIGL,PIGF,PIGC,PIGV,PIGP,LDLR,MBOAT2,CRLS1,ATM,PIK3C2G,LCAT,PIP4K2A,PEMT,SLC44A1,SLC44A2,SLC44A4,SLC44A5,CDS2,PIK3CB,PLA2G16,DGAT2,PIK3R4,PCK1	NR1H2,NR1H3,CTDNEP1,ACLY,TECR,ACHE,PIP5K1B,PIP5K1C,PIP5K1A,PHOSPHO1,SCARB1,GK,PGAP3,PGAP2,PGAP1,MTMR14,C3,ACSL1,ACSL4,ACSL3,ACSL6,ACSL5,MPPE1,CHKA,CHKB,AGPAT5,AGPAT4,AGPAT3,AGPAT1,PLA2G6,PLA2G5,MOGAT3,MOGAT1,MTM1,HADHA,HADHB,SYNJ1,SYNJ2,ELOVL1,ELOVL5,ELOVL4,ELOVL2,ELOVL7,ELOVL6,LCLAT1,PLSCR1,FBXW7,PLD3,PLD2,PLD1,PLD4,PLBD1,ETNK1,ETNK2,PLS1,PLAUR,APOA2,TAZ,PCYT2,INPP4B,INPP4A,INPP5K,INPP5J,INPP5E,…	-0.492256	0.00178723	0.0342217
positive regulation of cell adhesion(GO:0045785)	166	350	29	16420	0.18	137	41834	0.33	FBLN2,ITGB1BP1,PTPRJ,CYR61,ILK,CHRD,PRKCE,JAK2,TGFB2,FOXA1,MYO10,TEK,LGALS1,PTK2B,TPM1,MYADM,CCL21,BMP7,ROCK1,ANK3,ALOX12,GSK3B,APC,EMILIN1,EPB41L5,TRIOBP,FLCN,ANGPT1,GCNT2	EGFLAM,NET1,TFE3,PIEZO1,FBLN2,EMP2,ITGB1BP1,PTPRJ,ARHGEF7,VAV3,VAV1,PPM1F,CYR61,TBX18,NINJ1,PTPN6,ILK,HYAL1,IL12A,CXCL12,CIB1,EPHA1,CHRD,PRKCA,PRKCE,PRKD2,PRKCZ,HRG,NID1,SEBOX,CDC42,JAK2,WNT5A,FOXF1,SPP1,EGFL6,TGFB2,FOXA1,MYO10,SYK,TEK,TSC1,LGALS1,IFT74,SRC,DMP1,MYOC,ARPC2,ARL2,DENND6A,UTRN,VIT,DMD,ITGAL,ITGB1,ITGAV,PODXL,ITGA2,ITGA3,ITGA6,ITGA5,CCDC80,PTK2B,FGG,FGA,FGB,SPOCK2,TPM1,DUSP26,PREX1,S…	-0.617476	0.00177734	0.0342217
positive regulation of multicellular organismal process(GO:0051240)	576	1353	129	16320	0.78	447	41524	1.07	FRS2,BCL10,NEU1,ATF2,HDAC2,ADRA1B,ADRA1A,PAX2,CAMK2D,SULF2,SULF1,BMPR1B,FCER1G,TBX20,LZTS1,AR,IL7,AGPAT1,PLA2G6,TF,GHRHR,CHUK,PRKCE,PRKCQ,IRF1,XRCC5,BBS4,CHD7,JAK2,EDNRB,ZCCHC11,TBX5,EPHX2,CD276,ATP8A2,NFKBIA,USF1,EREG,TGFB3,TGFB2,ADORA2B,BMPR2,CA2,PLAT,AKIRIN2,TNR,SYTL2,BMP10,HEY2,ATRAID,AQP1,ADAM17,CLU,RNF10,MAPK8,IL17RA,TFAP2A,TEAD3,GDF2,DCSTAMP,ACVR1,ENG,WASF3,IFNAR1,ACVR2A,ACVR2B,TPM1,IGF1,H…	SCN3B,DHX9,TICAM1,TICAM2,GHR,CFTR,ATG5,ATG7,FRS2,BCL10,FADD,NEU1,ATF2,HDAC2,ADRA1B,TBXA2R,ADRA1A,PAX2,PAX8,SCPEP1,IL6ST,NELL1,FST,NR1H2,SASH3,PARD3,SPTBN4,PPIB,NLRP3,NLRP1,CAMK2D,PARK7,SULF2,SULF1,BMPR1B,BMPR1A,PTPRM,HGF,HLX,ARHGEF2,FFAR3,NLRX1,MAVS,XCL1,FCER1G,TBX20,NFKB1,NFKB2,WT1,F7,F3,F2,LZTS1,AR,PKDCC,IL12A,C3,C5,PPP3CA,IL7,ABCA7,LRRFIP1,IFI16,TNFSF9,CYBA,GHSR,AGPAT1,MB21D1,PLA2G6,TF,BCL3,SO…	-0.308866	0.00179388	0.0342479
regulation of I-kappaB kinase/NF-kappaB signaling(GO:0043122)	227	590	43	16406	0.26	184	41787	0.44	BCL10,NEK6,FYN,PPM1B,CHUK,PRKCE,PRKD1,NFKBIA,NDFIP1,NDFIP2,CFLAR,LGALS1,RNF31,CTH,ABL1,UBE2V1,CXXC5,PELI2,PELI1,CTNNB1,NOD1,CCL21,CCL19,TRADD,BMP7,FASLG,MYD88,GPRC5B,MAP3K7,RIPK1,TRIM13,IL10,RPS27A,TRAF3IP2,TMED4,CD40,GJA1,SLC44A2,IKBKB,CASP8,ANGPT1,ZNF268,DAB2IP	TICAM1,TICAM2,NLRC3,BCL10,FADD,FAF1,NEK6,PDPK1,FYN,TNIP2,TNIP1,NLRP3,NLRX1,MIER1,MAVS,PPM1A,PPM1B,VAPA,MUL1,WLS,S100B,MTDH,FKBP1A,BCL3,BIRC3,BIRC2,IRAK4,CHUK,IRAK1,PRKCE,PRKCB,UBE2N,PRKD1,IRF3,FBXW11,HMOX1,SHARPIN,CYLD,TBK1,TIRAP,MALT1,RORA,NFKBID,NFKBIA,MID2,GPR89B,MIB2,NDFIP1,NDFIP2,MAP3K14,TFG,CFLAR,IL23A,APOL3,GOLT1B,PLK2,ESR1,SHISA5,TAB2,CLEC6A,LGALS1,LGALS9,SQSTM1,RNF31,CTH,TNFRSF1A,CARD11,…	-0.518797	0.00182334	0.0347077
heart development(GO:0007507)	480	772	105	16344	0.64	375	41596	0.89	FRS2,NEU1,ATF2,HDAC2,ADRA1B,ADRA1A,ACADM,SCN5A,CAMK2D,PTPRJ,TBX20,CYR61,VCAN,WNT8A,ID2,PLXND1,BBS4,BBS7,CHD7,TBX3,TBX5,TGFB2,CAD,DCHS1,TTN,BMP10,ARID1A,TEK,HEY2,TAB1,GAB1,ADAM19,SRI,XIRP1,XIRP2,IFT122,TFAP2A,IFT88,EPOR,ADIPOR2,ACVR1,ENG,ACVR2B,TPM1,HIF1A,ZFPM2,COL3A1,PDGFB,SETDB2,CTNNB1,RPS6KA2,IFT172,SMAD4,SMAD1,FGF9,NFATC4,NFATC3,RAF1,PPARD,PPARG,GATA6,GATA4,AKAP6,MKKS,MKL2,ERBB4,RTN4,JMJD6,BAS…	PARVA,ATG5,ATG7,FRS2,NEU1,ATF2,HDAC5,HDAC2,ADRA1B,ADRA1A,HDAC9,PAX3,ACADM,NEXN,GAA,SCN5A,BAZ1B,MAML1,ZFP36L1,NEBL,ZMIZ1,CAMK2D,BMPR1A,PTPRJ,HEXIM1,GYS1,TBX20,CYR61,TBX18,MED1,WT1,AXIN2,BVES,MYLK2,SH3PXD2B,VCAN,PPP3CB,WNT8A,LMNA,LMO4,MB,TXNRD2,ID2,ID1,ID3,VANGL2,EPHB4,BCOR,TH,FKBP1A,SOD2,PLXND1,PRKDC,POFUT1,DLC1,MYO18B,KCNJ8,C3orf58,JAG1,SMARCD3,DLL1,HHEX,DLL4,BBS4,BBS5,BBS7,NIPBL,PRKAR1A,CDC42,MS…	-0.338823	0.00185938	0.0349823
intracellular receptor signaling pathway(GO:0030522)	273	808	54	16395	0.33	219	41752	0.52	NR1H4,NR1I3,NR1I2,NR2F2,AR,NR4A2,GHRHR,CHUK,JAK2,RBM14,NFKBIA,GRIP1,FOXA1,DDX17,CNOT2,CNOT1,ARID1A,TAF7,ESR2,TAB1,RNF14,MED13,FKBP4,RNF6,KANK2,ESRRG,IGF1,DYX1C1,UBE2V1,CTNNB1,NOD1,STRN3,RAN,PPARD,PPARG,MAP3K7,EZH2,BRD8,TRIM16,RPS27A,SMARCA4,SP100,NRIP1,NCOA1,NCOA3,IFIH1,NR6A1,ASXL2,IKBKB,CASP8,TCF21,CARM1,KDM3A,SUGT1	NLRC4,NR2C1,HDAC1,HDAC6,PRMT2,SLA2,PIAS2,PIAS1,NR1H2,NR1H4,NR1I3,NR1I2,NR1D1,NR1D2,NLRP3,NLRP1,PARK7,CLOCK,NLRX1,MAVS,NR3C1,CYP26A1,NR2F6,NR2F2,NR2F1,MED4,MED1,MEFV,ARNTL,PAK1,CYP26B1,CYP26C1,AR,LMO3,PRCP,NR4A2,NR4A1,KLF9,CYP27B1,BIRC3,BIRC2,GHRHR,SNW1,CHUK,IRAK2,IRAK1,UBE2I,UBE2N,UBE3A,IRF7,IRF3,TGIF1,NR5A2,JAK2,CYLD,TBX1,RBM14,RORC,RORB,RORA,NFKBIA,FOXH1,GRIP1,TXN,ARRB2,FOXA1,DDX17,PRAM1,UBR5,S…	-0.465317	0.00185661	0.0349823
inositol lipid-mediated signaling(GO:0048017)	196	503	36	16413	0.22	160	41811	0.38	FRS2,FYN,CHUK,JAK2,EREG,TGFB2,CA8,PHLPP2,FOXO1,TEK,GAB1,PLCH1,IGF1,CDKN1B,PREX2,PDGFB,RPS6KB1,KITLG,MAPKAP1,FGF9,NCOR1,PPARD,TNRC6C,ERBB4,PIK3C2G,GSK3B,PTK2,NRG2,HCLS1,FLT1,FLT3,AGO2,FGF20,PIK3CB,ANGPT1,DAB2IP	FRS2,PDPK1,FYN,PLEKHA1,MDM2,STAMBP,HGF,VAV1,PTPN6,GSN,F2,NR4A1,KLF4,PLXNB1,PRR5,MTOR,CHUK,UBE3A,C3orf58,UNC5B,IRS1,CREB1,JAK2,ADORA3,SOX9,ENTPD5,RASGRP1,BTC,EREG,TGFB2,MLST8,MYO16,CAT,CA8,PHLPP1,PHLPP2,CBL,SEMA4D,FOXO1,FOXO3,FOXO4,NKX3-1,CSF1R,AKT1S1,TEK,TSC2,INPP5F,GAB2,GAB1,MYOC,PIK3IP1,PI4KA,PI4KB,EGF,NTRK2,GRB2,HBEGF,HTR2B,HTR2A,HCST,FGR,PLCH1,F2R,OGT,IGF1,CDKN1A,CDKN1B,PREX2,EDN1,PDGFB,PDGFA…	-0.556569	0.00185378	0.0349823
phosphatidylinositol-mediated signaling(GO:0048015)	196	503	36	16413	0.22	160	41811	0.38	FRS2,FYN,CHUK,JAK2,EREG,TGFB2,CA8,PHLPP2,FOXO1,TEK,GAB1,PLCH1,IGF1,CDKN1B,PREX2,PDGFB,RPS6KB1,KITLG,MAPKAP1,FGF9,NCOR1,PPARD,TNRC6C,ERBB4,PIK3C2G,GSK3B,PTK2,NRG2,HCLS1,FLT1,FLT3,AGO2,FGF20,PIK3CB,ANGPT1,DAB2IP	FRS2,PDPK1,FYN,PLEKHA1,MDM2,STAMBP,HGF,VAV1,PTPN6,GSN,F2,NR4A1,KLF4,PLXNB1,PRR5,MTOR,CHUK,UBE3A,C3orf58,UNC5B,IRS1,CREB1,JAK2,ADORA3,SOX9,ENTPD5,RASGRP1,BTC,EREG,TGFB2,MLST8,MYO16,CAT,CA8,PHLPP1,PHLPP2,CBL,SEMA4D,FOXO1,FOXO3,FOXO4,NKX3-1,CSF1R,AKT1S1,TEK,TSC2,INPP5F,GAB2,GAB1,MYOC,PIK3IP1,PI4KA,PI4KB,EGF,NTRK2,GRB2,HBEGF,HTR2B,HTR2A,HCST,FGR,PLCH1,F2R,OGT,IGF1,CDKN1A,CDKN1B,PREX2,EDN1,PDGFB,PDGFA…	-0.556569	0.00185378	0.0349823
single-organism behavior(GO:0044708)	363	579	76	16373	0.46	287	41684	0.68	SCN1A,CACNB4,GALR3,NEU1,LRRK2,SCN9A,ADRA1B,LRRN4,FYN,LSAMP,FOS,ATXN1,MAPT,ADCY1,SNCA,PTPRZ1,SLITRK1,SLITRK6,SLITRK5,CRTC1,LRRTM1,NR4A2,ID2,MBD5,PLA2G6,BCHE,PRKCE,PRNP,UNC79,BBS4,CHD7,SLC6A4,CYTB,USP46,GRIK1,GRIK2,GRIA1,TNR,ADAM22,DBI,HOXA1,GRIN2A,ABAT,NLGN4X,ABI2,GRM4,PAIP2,AMPH,HIF1A,PREX2,RPS6KB1,CHRNA7,OXR1,STRBP,SLC24A2,HOMER1,THBS4,NQO2,JPH3,GJA1,GIT2,NPHP1,FBXL20,ZIC1,SLC12A5,FGF14,EGR1,EGR…	BTBD9,SCN1A,CACNB4,NR2E1,ATG7,GALR3,NEU1,LRRK2,SCN9A,ADRA1B,SCN8A,ZFHX2,CPEB3,FXN,LRRN4,FYN,LSAMP,SPTBN4,SPTBN2,FOS,GFI1,PARK7,ATXN1,NAGLU,PPT1,MAPT,SNCG,ADCY1,ADCY8,SNCA,BDNF,HPRT1,PTPRZ1,ITPR3,NEUROD2,WFS1,OBP2B,SLITRK1,SLITRK6,SLITRK5,MAFG,GPI,CRTC1,VDAC1,OPRM1,KCNAB1,LRRTM1,PPP3CB,CXCL12,ABCA7,NR4A2,S100B,KLK8,ID2,EPHB2,EPHA4,GHSR,MBD5,RIN1,PLA2G6,CHL1,TH,TSPO,BCHE,HTT,PRKCG,PRKCE,PRNP,PRKCZ,…	-0.394265	0.00188366	0.0353364
peptidyl-tyrosine dephosphorylation(GO:0035335)	102	357	15	16434	0.09	87	41884	0.21	MDP1,PTPRJ,PTPRK,PTPRS,PTPRZ1,PTPN4,PTPRD,RNGTT,SSH2,DUSP12,MTMR6,DUS2,EYA4,EYA2,CDC25C	PTPRN2,MDP1,PTPRJ,PTPRK,PTPRM,PTPRF,PTPRG,PTPRH,PTPRR,PTPRS,PTPRT,PTPRU,PTPRN,PTPRO,ACP1,DUPD1,PTPRZ1,PTPN7,PTPN6,PTPN3,PTPN2,PTPN4,PTPN1,PTPRB,PTPRC,PTPRD,PTPRE,PTPRA,MTMR14,PTP4A3,PTP4A2,MTM1,RNGTT,TIMM50,PTPDC1,HACD1,UBASH3B,SSH1,SSH3,SSH2,DUSP10,DUSP12,DUSP11,DUSP18,DUSP19,DUSP13,DUSP15,DUSP23,DUSP22,DUSP28,DUSP26,MTMR2,MTMR3,MTMR1,MTMR8,MTMR6,MTMR7,MTMR4,PGP,PTPN23,PTPN22,PTPN21,PTPN18,PTPN1…	-0.822306	0.00188982	0.0353494
membrane lipid metabolic process(GO:0006643)	179	430	32	16417	0.19	147	41824	0.35	NEU1,SGPL1,SGPP2,ORMDL1,CYR61,ASAH1,ST6GALNAC5,ST6GALNAC6,ST6GALNAC3,ST6GALNAC4,PLA2G6,PRKD1,UGT8,ACER2,CERS1,HEXA,SERINC5,SERINC1,DEGS2,FAM135A,SPTSSA,DPM2,SMPDL3A,PIGK,PIGL,PIGF,PIGC,PIGV,PIGP,SMPD3,PLA2G15,CTSA	UGCG,GLA,NEU1,NEU3,NEU4,ST8SIA1,ST8SIA3,ST8SIA4,ST8SIA5,GBA,SGPL1,TEX2,CSNK1G2,FA2H,SGPP2,PPT1,SPHK2,CERK,PPM1L,VAPA,VAPB,ORMDL1,CYR61,ORMDL2,ORMDL3,SUMF1,SGMS2,SGMS1,ASAH1,ASAH2,ST6GALNAC5,ST6GALNAC6,ST6GALNAC3,ST6GALNAC4,PGAP3,PGAP2,PGAP1,MPPE1,NSMAF,PLA2G6,TH,PRKCD,PRKD1,PPP2CA,ELOVL1,ST3GAL5,ST3GAL6,PSAP,UGT8,ACER3,ACER2,CERS6,CERS5,CERS4,CERS1,CERS2,GBA2,PLAUR,STS,HEXA,HEXB,SERINC3,SERINC2,S…	-0.589544	0.00197135	0.0367683
tissue homeostasis(GO:0001894)	143	328	24	16425	0.15	119	41852	0.28	LRRK1,ACP5,IL7,TF,BBS4,VPS54,CA2,DCSTAMP,HNF1A,PTK2B,TPP1,ZNF830,CTNNB1,SERPINA3,MKKS,HOMER1,COL14A1,LCA5,NPHP3,EPAS1,CDH3,LYZ,CXADR,GCNT2	LRRK1,SASH3,PBLD,ACP5,ADD1,NEUROD1,FH,IL7,MUC4,TF,SOD1,BBS4,BBS1,BBS2,ADRB2,COL11A2,SOX9,VPS54,SPP1,CA2,CD7,CSF1R,RPA1,ERCC6,SYK,INPP5D,S1PR1,SRF,SRC,CSK,LIPA,P2RX4,P2RX7,ILDR2,ITGB3,ITGB1,CORO1A,PCDH15,DCSTAMP,HNF1A,WDR36,PTK2B,STK11,IL20RA,TPP1,F2R,IGKC,VEGFA,RBP4,NAPSA,ZNF830,LTBP3,CTNNB1,PTH1R,NOD2,BBS12,BBS10,GNAS,BARD1,TRAF6,PRDX5,PRDX1,PDGFRB,COL2A1,STRAP,RAC2,RAC1,SERPINA3,AZGP1,NOX4,TEX1…	-0.665735	0.0020153	0.0373726
phosphatidylinositol metabolic process(GO:0046488)	143	439	24	16425	0.15	119	41852	0.28	PIP5KL1,PLEK,PLBD1,INPP4B,ARF1,ARF3,FAM135A,DPM2,INPP1,MTMR6,PDGFB,PI4K2A,PIGK,PIGL,PIGF,PIGC,PIGV,PIGP,ATM,PIK3C2G,PIP4K2A,PIK3CB,PLA2G16,PIK3R4	PIP5KL1,SMG1,PIP5K1B,PIP5K1C,PIP5K1A,PGAP3,PGAP2,PGAP1,MTMR14,MPPE1,PLA2G5,MTM1,SYNJ1,SYNJ2,IMPAD1,PLEK,CSF1R,PLBD1,PLAUR,BPNT1,INPP4B,INPP4A,INPP5K,INPP5J,INPP5F,INPP5E,INPP5D,INPP5B,INPP5A,ARF1,ARF3,PI4KA,PI4KB,FAM135A,FAM135B,PITPNM3,GPAA1,DPM1,DPM2,HTR2B,HTR2A,FBP1,FBP2,PLCH2,PLCB1,INPP1,PLCD4,MTMR2,MTMR3,MTMR1,MTMR6,MTMR7,MTMR4,FIG4,PDGFB,PDGFA,SERAC1,CHRM5,PDGFRB,SLC27A1,INPPL1,PI4K2B,PI4K2…	-0.665735	0.0020153	0.0373726
JAK-STAT cascade(GO:0007259)	96	241	14	16435	0.09	82	41889	0.2	SOCS5,JAK2,IL15RA,ADAM17,IFNAR1,IFNAR2,IGF1,ERBB4,CSF2,IL15,CD40,HCLS1,FLT3,NMI	GHR,IL6ST,PIAS1,STAMBP,PECAM1,HGS,SH2B2,NEUROD1,SOCS2,SOCS6,SOCS5,PTPN6,PTPN2,PTPN1,IL12A,PRLR,HPX,PPP2CA,IRS1,JAK2,JAK3,ELP2,IL15RA,SAC3D1,CSF1R,IL23A,CLCF1,ADAM17,CISH,TNFRSF1A,MAPK1,MAPK3,EGF,HES1,ADIPOR1,FER,IL31RA,IFNAR1,IFNAR2,F2R,PKD2,PKD1,IGF1,CNTF,STAT5A,STAT5B,OSM,STRA6,DOT1L,LEPROT,PIGU,PPP2R1A,CRLF3,CRLF1,ARL2BP,ERBB4,NOTCH1,IL6R,CSF2,IL13,IL15,IL26,CD40,CCR2,KIT,AGT,HCLS1,FGFR3,LCK,F…	-0.832052	0.00209631	0.0387637
obsolete ATP catabolic process(GO:0006200)	414	1005	89	16360	0.54	325	41646	0.77	ATP6,ATF7IP,ATP5A1,MDN1,ATP5J2,ABCA3,ABCB1,ABCB4,PICK1,XRCC3,XRCC2,ENPP1,ABCG8,ABCG5,ABCF1,ABCF3,ABCE1,ABCD4,ABCC3,ABCC4,ABCC1,ABCC2,ABCC5,ABCC6,PSMC6,MSH6,MSH3,MSH2,MSH5,MSH4,VPS4A,SKIV2L,MYO10,DMC1,DDX17,DDX18,DDX10,PLS1,OLA1,ATP6V1G2,ATP6V1G1,PMS1,SWSAP1,GTF2H4,DDX23,DDX25,DDX24,DDX47,DDX49,DDX56,DDX51,POLQ,ATP13A1,ATAD2,TPM1,ATP5O,DDX39B,HSP90AA1,CENPE,KIF5B,KIF5C,KIF3C,UPF1,KIF27,KIF20A,HSPA…	ATP6,DHX8,DHX9,ATF7IP,CFTR,ATRX,SNRNP200,ABCB10,ABCB11,ATP5C1,ATP5A1,PPIF,MDN1,RALBP1,WRNIP1,ACLY,LONRF3,LONRF1,LONRF2,ATP5J2,KIF9,KIF7,KIF6,ATP5F1,ABCC11,ABCC10,YTHDC2,WRN,TTF2,IDE,ABCA8,ABCA7,ABCA9,ABCA2,ABCA1,ABCA3,ABCA6,ABCA5,ABCB9,ABCB8,ABCB1,ABCB7,ABCB6,ABCB4,PICK1,XRCC3,XRCC2,CHD8,CHD6,CHD5,CHD4,CHD3,RNF213,ENPP1,ABCG4,ABCG1,ABCG2,ABCG8,ABCG5,ABCF1,ABCF3,ABCF2,ABCE1,ABCD1,ABCD2,ABCD3,ABCD4…	-0.360823	0.00211772	0.0388993
proteasome-mediated ubiquitin-dependent protein catabolic process(GO:0043161)	304	699	62	16387	0.38	242	41729	0.58	LRRK2,WWP2,WWP1,ANAPC1,ANAPC4,ATXN3,UFL1,ERLEC1,SUMO1,SOCS5,KLHL20,UBE2W,COMMD1,KLHL42,BBS7,CDC23,PSMA2,PSMA6,PSMA3,PSMA7,PSMB7,PSMC6,PSMD2,PSMD7,PSME1,PSME2,PSME4,CSNK1E,FBXW7,FBXL7,FBXL3,ERLIN1,ATRAID,CLU,RNF5,UBE2J1,UBXN1,UBE2D3,RFWD2,ANAPC10,AURKA,YOD1,HSPA5,BAG5,BAG6,UBQLN1,PSMB10,TRIM13,GSK3B,RPS27A,TRIM63,TRIB2,PTTG1,PSMD14,DERL1,CUL3,CUL1,DNAJB9,SKP1,SPOPL,DAB2IP,RFFL	LRRK2,CUL4A,FAF1,NELL1,WWP2,WWP1,ANAPC1,ANAPC2,ANAPC5,ANAPC4,PIAS1,ANAPC7,SEC61B,MDM2,PARK7,ATXN3,NPLOC4,CLOCK,UFL1,TBL1X,ERLEC1,SUMO2,SUMO1,WFS1,SOCS4,SOCS5,ARNTL,AXIN1,BUB1B,FOXRED2,BIRC2,KLHL20,UBE2I,UBE2C,UBE2B,UBE2K,UBE2W,COMMD1,UBE2S,KLHL42,UBE4B,PPP2CB,FBXW11,BUB3,MTA1,BBS7,CDC16,CDC34,C2orf40,CDC23,CDC20,CDC26,CDC27,PSMA2,PSMA1,PSMA6,PSMA5,PSMA4,PSMA3,PSMA7,PSMB5,PSMB4,PSMB7,PSMB6,PSMB1,P…	-0.427095	0.00212059	0.0388993
muscle contraction(GO:0006936)	279	671	56	16393	0.34	223	41748	0.53	NEU1,ADRA1B,ADRA1A,SCN7A,SCN5A,CAMK2D,SULF2,SULF1,CKMT2,TBX20,BDKRB2,PLA2G6,FKBP1B,CHUK,EDNRB,ATP8A2,ADORA2B,TRDN,TTN,BMP10,CALM1,SRI,MYOT,TPM1,TPM4,MYBPC1,RPS6KB1,PXN,SMAD5,CNN1,GSTO1,LTB4R,GATA4,MKKS,ROCK1,ROCK2,HOMER1,DTNA,RGS2,GJA1,TRIM63,NCF1,FLII,MAP2K3,GUCY1A3,ATP1A1,DAPK3,RYR2,ATP2A1,PDE4D,PDE5A,MYH11,CACNA1C,NEB,RAP1GDS1,CALCRL	SCN3B,SCN2B,SCN1B,CACNG1,ARHGEF11,NEU1,HDAC4,ADRA1B,TBXA2R,ADRA1A,SCN7A,GAA,SCN5A,SCN4B,SCN4A,CAMK2D,SULF2,SULF1,SMPX,CKMT2,ACHE,TBX20,SMTN,PGAM2,MYLK2,MB,PABPN1,PRKG1,BDKRB2,GHSR,PLA2G6,FKBP1A,FKBP1B,TPCN2,SOD1,CHUK,PRKCA,KLHL41,KCNJ2,KCNH2,DLG1,BBS2,ADRB2,ADORA1,EDNRA,EDNRB,KCNQ1,MYL6B,SLC6A8,ATP8A2,GAMT,ADORA2B,SNTB1,TRDN,SNTA1,TTN,MYOCD,ACTG2,ACTA1,ACTA2,ACTC1,BMP10,TAZ,ACTN2,ACTN3,DES,TMOD1,…	-0.447023	0.00212167	0.0388993
regulation of binding(GO:0051098)	234	461	45	16404	0.27	189	41782	0.45	LRRK2,PRMT7,PRMT8,MAPRE3,ITGB1BP1,SUMO1,ID2,PLXND1,JAK2,NFKBIA,CSNK2B,WAPL,HEY2,RAPGEF2,CAPRIN2,SRI,CTHRC1,MAPK8,EBF2,LHX2,NME1,PLCL1,EIF2AK3,IGF1,ZFP90,MMP9,SMAD4,AURKA,RAN,HAND2,GSK3B,SMARCA4,ACD,SP100,SPAG9,HMGB2,LDLRAP1,CDON,AKTIP,EPB41L5,TMEM173,CRTAC1,ANGPT1,ZNF268,CARM1	BTBD1,PARP1,TICAM1,LRRK2,HDAC5,HDAC4,PRMT7,PRMT8,MAPRE1,MAPRE3,MDFI,MITD1,PYGO2,ITGB1BP1,PARK7,PTPRF,MEPCE,BTAF1,ADD2,ADD1,SUMO1,NEUROD1,TFAP4,MEN1,IFI16,ID2,ID1,GTPBP4,WFIKKN1,FKBP1A,BCL3,PLXND1,SORL1,PRKCD,IRF4,SMARCD3,HERPUD1,SEBOX,CDC42,HMOX1,ADRB2,MSX2,JAK2,PITX2,TIRAP,MEF2C,NFKBIA,TXN,CSNK2B,TGFB1,ARRB2,ARRB1,WAPL,CEBPG,CAMK1,MYOCD,BLM,NKX3-1,ERCC2,TGFBR1,TGFBR3,SNAPIN,PLK2,PLK1,TDG,HEY1,HE…	-0.500144	0.00214328	0.0391846
divalent inorganic cation transport(GO:0072511)	346	994	72	16377	0.44	274	41697	0.65	CACNB1,CACNB2,CACNB3,CACNB4,SLC3A2,ADRA1A,FYN,SLC25A25,NIPAL4,CAMK2D,CAMK2B,CAMK2A,SNCA,ITPR2,CATSPER2,BDKRB1,PLA2G6,FKBP1B,TPCN1,PRKCE,AHNAK,TRDN,IBTK,TRPV2,TRPV4,LOXHD1,TRPM7,TRPM1,OLA1,TRPC4,CALM1,NALCN,PKD2L1,PKD2L2,SRI,RAMP3,GRIN2A,ABL1,DIAPH1,PTK2B,TPT1,PDGFB,CTNNB1,CCL21,CCL19,DRG2,CHRNA7,GSTO1,SLC24A3,SLC24A2,AKAP6,HOMER1,JPH3,GJA1,JPH1,GPM6A,CUL5,RYR2,ATP2B1,ATP2B3,ATP2A1,CASR,P2RY12,PDE…	GEM,CACNB1,CACNB2,CACNB3,CACNB4,ORAI3,CACNG8,CACNG7,CACNG5,SLC3A2,CACNG4,GIF,CACNG2,CACNG1,ATG5,ADRA1A,PDPK1,FYN,SLC25A25,NIPAL3,NIPAL2,NIPAL1,NIPAL4,CAMK2G,CAMK2D,CAMK2B,CAMK2A,XCL1,SNCA,ITPR3,ITPR1,ITPR2,WFS1,PTPN6,PTPRC,F2,OPRM1,PPP3CA,CXCL11,CXCL12,CXCL10,CYBA,GTPBP4,GTPBP8,CATSPER2,CATSPER3,BDKRB1,PLA2G6,FKBP1A,FKBP1B,TPCN1,TPCN2,CYP27B1,TSPO,TCN2,HTT,PRKCE,PRKCB,KCNJ2,MICU1,NIPA2,NIPA1,CREB…	-0.401911	0.00217849	0.0397159
cell projection assembly(GO:0030031)	321	689	66	16383	0.4	255	41716	0.61	SPATA13,ARHGEF4,ARHGEF6,KLF5,BBS4,BBS7,BBS9,RAB3IP,ABLIM1,B9D1,TGFB3,MYO10,WASL,ATP6V0D1,POC1B,FOXJ1,TBC1D7,DNM3,AQP1,ACTR3,ACTR2,ABL1,IFT88,SSH2,NME5,WDR35,WASF3,WASF2,EVL,COBL,E2F4,SNX10,PDGFB,OPHN1,CCL21,CCL19,WDPCP,IFT172,CAPZB,PXN,RALA,FGD5,FGD4,KIF27,DZIP1,MKKS,ROCK1,RDX,AIF1,GPM6A,AK7,APC,CDC42EP1,RHOQ,ODF2,SLIT2,BAIAP2L2,FOPNL,TMEM17,TTLL5,PCM1,PCNT,MYH10,DPYSL3,CCDC88A,NRXN1	LRRC6,ARHGEF26,PARVB,MTSS1,ATG5,SPATA13,ATG3,FAM110C,NEK1,NEMF,NEFH,PTPRO,ARHGEF4,ARHGEF7,ARHGEF6,BBIP1,TWF2,VAV3,VAV2,PIP5K1A,SH2B1,SCLT1,PALM,TTC30B,MIEN1,SPAG16,TTC8,TTYH1,RSPH1,VANGL2,RSPH9,KLF5,CELSR3,CELSR2,EPHA2,PLXNB3,MTOR,PRKCD,UBE2B,HRG,KLHL41,TTC26,BBS4,BBS5,BBS7,BBS9,TTBK2,RAB3IP,CDC42,BBS1,BBS2,ABLIM1,ABLIM3,CD2AP,DZIP1L,TENM1,TENM2,B9D1,B9D2,ATP8B1,TGFB3,MYO10,WASL,CEP290,BIN3,C11or…	-0.416968	0.00223783	0.0406833
regulation of actin filament-based process(GO:0032970)	295	704	60	16389	0.36	235	41736	0.56	HDAC2,SCN5A,SPTBN1,ITGB1BP1,CFL2,CAMK2D,SH3BGRL3,SPTAN1,ILK,EPHA5,PICK1,PRKCE,JMY,SPTB,SEMA3E,PLEK,BMP10,TEK,ACTR3,ACTR2,SRI,ARHGAP6,CRK,ARF1,ABI2,ABL1,FHOD1,PPFIA1,SSH2,PTK2B,ELN,WASF2,EVL,TPM1,AMOT,MYADM,CCL21,LIMK1,CAPZB,GATA4,ROCK1,ROCK2,RDX,JUP,RGCC,GJA1,HCLS1,RHOQ,SLIT2,BAIAP2L2,ATP1A1,DAPK3,RYR2,PDXP,TRIOBP,PDE4D,ARPC5L,NEB,LMOD2,CCDC88A	SCN3B,SCN2B,SCN1B,KISS1R,ARHGEF19,ARHGEF15,ARHGEF10,MTSS1,HDAC2,SCN5A,SCN4B,ALMS1,PARD3,SPTBN5,SPTBN4,SPTBN2,SPTBN1,PHPT1,ITGB1BP1,CFL2,CAMK2D,PECAM1,CAPZA2,CAPZA1,TWF1,TWF2,VASP,PPM1F,PPM1E,HCK,SH3BGRL3,ADD2,ADD1,PAK3,GSN,PAK1,SPTAN1,ILK,MYLK2,CXCL12,SPECC1L,AVIL,VANGL2,CELSR1,EPHA1,EPHA3,EPHA5,PICK1,MTPN,MTOR,PRKCE,PRKCD,HRG,DLC1,KCNJ2,LATS1,JMY,PLEKHH2,KCNH2,KCNE1,KCNE2,KCNA5,DLG1,JAM3,CD2AP,A…	-0.430487	0.00226481	0.0409438
microtubule-based movement(GO:0007018)	204	559	38	16411	0.23	166	41805	0.4	TTC21B,MAPT,AP3M2,KLC1,BBS4,SPG7,UGT8,ACTR3,ACTR2,IFT43,IFT122,NME5,WDR35,DNHD1,DYX1C1,HIF1A,ARHGAP21,DNAH3,CENPE,KIF5B,KIF5C,KIF3C,KIF27,KIF20A,MKKS,ACTR10,KIF13B,KIF16B,BICD1,LCA5,BLOC1S2,AK7,NPHP3,LRPPRC,DYNC1LI2,RAB1A,ULK4,PCM1	LRRC6,HDAC6,TTC21B,NEFH,NEFM,OPA1,MAP4,AP3S2,AP3S1,MAPT,COPG1,KIF9,KIF7,AP3M2,KIF6,AP3M1,CCSAP,TTC30B,AP3B2,AP3B1,AP3D1,RSPH9,CELSR2,KLC2,KLC1,APBA1,SOD1,HTT,PRKCZ,DTNBP1,BBS4,CDC42,BBS2,SPG7,UGT8,RASGRP1,RACGAP1,RPGR,KIFC2,KIFC1,KIFC3,SNAPIN,IFT20,ACTR3,ACTR2,IFT74,IFT46,IFT43,IFT57,IFT52,IFT122,ARL3,IFT81,PEX14,FYCO1,CCDC39,CCDC40,MAP1B,MAP1S,NME7,UXT,NME5,WDR35,CLN3,WDR19,STK36,DNHD1,UCHL1,PAF…	-0.539338	0.00225851	0.0409438
circadian rhythm(GO:0007623)	137	305	23	16426	0.14	114	41857	0.27	HDAC3,HDAC2,GFPT1,ADCY1,CRTC1,ID2,SLC6A4,PPP1CB,CSNK1E,FBXL3,PROKR2,SREBF1,RAI1,NCOR1,ROCK2,HOMER1,EZH2,GSK3B,DYRK1A,NRIP1,PSPC1,EGR1,KDM5A	BTBD9,PPP1CA,DHX9,ATF5,HDAC3,HDAC2,HDAC1,PRMT5,NR1H3,NR1D1,NR1D2,GFPT1,NAGLU,CLOCK,ADCY1,BDNF,NR2F6,ARNTL,F7,CRTC1,ID2,ID1,ID3,PRKG2,TH,NGFR,PRKDC,MAGED1,FBXW11,MTA1,NFIL3,CREB1,ADORA1,RBM4B,SLC6A4,PPP1CC,PPP1CB,RORC,RORB,RORA,CSNK1D,CSNK1E,PHLPP1,FBXL3,DDC,PROX1,ADIPOQ,PRKCDBP,NTRK3,NTRK2,TOP1,FAS,STAR,PROKR2,OGT,BHLHE41,TIMELESS,PTGDS,BHLHE40,SREBF1,NOCT,PML,METTL3,SUV39H1,SUV39H2,NONO,HTR7,CHR…	-0.665311	0.00228016	0.0411063
alcohol biosynthetic process(GO:0046165)	146	330	25	16424	0.15	121	41850	0.29	SNCA,FDFT1,C14orf1,CYB5R2,ACER2,APOB,PLEK,APOA2,PTK2B,LPIN1,CHPT1,SREBF1,SCP2,BMP5,DHCR24,LCAT,PEMT,SLC44A1,SLC44A2,SLC44A4,SLC44A5,PEX2,INSIG2,MVK,PCK1	ACAA2,CFTR,DHCR7,ISYNA1,GBA,GFI1,PARK7,MAS1,ACHE,IPMK,SNCA,NFKB1,PHOSPHO1,GPT,SGMS2,SGMS1,CYP2R1,ACSL3,FDFT1,CYP3A4,C14orf1,CHKA,CHKB,G6PD,CYP27A1,PLA2G5,CYP27B1,SOD1,HMGCS1,HMGCS2,IMPAD1,MSMO1,CYB5R3,CYB5R1,CYB5R2,ABCG1,DKK3,ACER3,ACER2,APOB,APOE,IDI1,NSDHL,PLEK,SNAI2,SNAI1,SQLE,APOA2,FDPS,SEC14L2,SC5D,PMVK,P2RY1,EBP,SCAP,DPAGT1,PTK2B,VDR,AKR1C3,LPIN2,LPIN1,LPIN3,STAR,GPAT4,WNT4,CHPT1,SREBF1,SCP…	-0.641567	0.00229525	0.0411248
positive regulation of immune effector process(GO:0002699)	106	361	16	16433	0.1	90	41881	0.21	BCL10,FCER1G,SOCS5,ZBTB1,AP1G1,ADORA2B,KCTD7,CCL19,GPRC5B,SH2D1B,MAP3K7,HLA-A,HLA-B,HLA-F,CD40,NCR3	BCL10,FADD,SASH3,PDPK1,HFE,HLX,FFAR3,XCL1,FCER1G,FCER1A,TBX21,SOCS5,PTPRC,CRTAM,IL12A,C3,C6,PRKCZ,HPX,CD226,ZBTB1,AP1G1,HMOX1,ADORA3,WNT5A,MALT1,FOXF1,TGFB1,ADORA2B,IL12RB1,SEMA7A,KCTD7,SYK,IL23A,WHSC1,CLCF1,GAB2,UNC13D,IL13RA1,P2RX7,PAXIP1,FGR,FER,FES,STXBP2,STAT5A,STAT5B,NOD2,CCL19,TRAF2,TRAF6,PVR,AZGP1,GPRC5B,RPS19,HSPD1,RARA,SH2D1A,SH2D1B,TLR2,TLR4,KLRK1,MAP3K7,IL4R,IL13,IL1B,HLA-A,HLA-B,HLA-…	-0.79168	0.00229161	0.0411248
positive regulation of multi-organism process(GO:0043902)	91	226	13	16436	0.08	78	41893	0.19	PPIA,NELFE,CCNT1,TAF11,GTF2H4,SRPK1,SMARCA4,TCEB1,CDK9,POLR2H,POLR2G,POLR2F,CHMP2A	ADARB1,SUPT16H,PPIH,PPIA,PPID,NELFA,NELFB,NELFE,VAPB,YTHDC2,ADAR,TFAP4,SNW1,HPN,NR5A2,VPS4B,ERCC3,ERCC2,BCL2L11,CCNT1,SP1,TAF11,GTF2H4,GTF2H3,GTF2H2,GTF2H1,SUPT4H1,GTF2F1,GTF2F2,TARBP2,ELL,TOP2A,SSRP1,NCBP2,NCBP1,MDFIC,RSF1,SRPK2,SRPK1,TMPRSS2,ZNF639,PFN1,DHX58,TRIM11,TRIM21,EP300,SMARCA4,SMARCB1,BAD,CCNH,TCEA1,TCEB2,TCEB3,TCEB1,CDK9,CDK7,IFIT1,CHMP3,SUPT5H,POLR2H,POLR2G,POLR2F,POLR2E,POLR2L,POLR…	-0.856115	0.00230024	0.0411248
glutathione metabolic process(GO:0006749)	40	140	3	16446	0.02	37	41934	0.09	GGCT,GLRX2,GSTA4	GSS,GSR,HAGHL,G6PD,SOD1,SOD2,GGCT,GGT5,GGT7,MGST1,MGST2,IDH1,GLRX2,PNKD,GCLC,GCLM,ALDH5A1,GSTA1,GSTA2,GSTA4,GSTA5,GSTZ1,GSTM5,GSTM1,GSTM3,GSTM4,GSTK1,GSTP1,GPX1,GPX4,HAGH,CNDP2,ETHE1,GLO1,CTNS,RIMKLA,RIMKLB	-1.57629	0.00231176	0.0412168
regulation of T cell activation(GO:0050863)	238	613	46	16403	0.28	192	41779	0.46	BCL10,PAWR,FYN,SOCS5,IL7,PRKCQ,PRNP,YES1,IRF1,PDCD1LG2,ZBTB1,CD276,CD274,VNN1,NDFIP1,FOXJ1,IL2RA,TESPA1,LGALS1,DPP4,C10orf54,IGF1,CDKN2A,PELI1,RC3H1,CTNNB1,CCL21,CCL19,MAPKAP1,HSPH1,HLA-DRB3,HLA-DRB4,HLA-DRB5,AIF1,MAP3K7,HLA-DRA,IL15,IL10,HLA-A,CD55,RIPK3,CASP3,ZEB1,GLI2,GLI3,PDE5A	SART1,ZAP70,BCL10,FADD,PAWR,IL6ST,SASH3,PDPK1,FYN,HLX,VAV1,XCL1,AP3B1,AP3D1,ITPKB,PAG1,SOCS6,SOCS5,PTPN6,PTPN2,PAK2,PAK1,PTPRC,IL12A,IL7,TNFSF9,BCL6,SOD1,ZC3H8,MTOR,PRKCQ,PRNP,PRKCZ,YES1,IRF1,IRF4,IGFBP2,PDCD1LG2,CD209,ZBTB1,CDC42,DLG1,JAK3,SLC46A2,CYLD,CD276,MALT1,CD274,CD247,RORC,VNN1,NFKBID,TGFB1,MLST8,IL12RB1,ICOS,CD2,CD4,CD5,CAMK4,NDFIP1,MAP3K14,BLM,FOXJ1,IL2RA,TESPA1,SYK,IL23A,TGFBR2,NKAP,L…	-0.493924	0.00233372	0.0413803
regulation of metal ion transport(GO:0010959)	238	582	46	16403	0.28	192	41779	0.46	CACNB2,CACNB4,SCN5A,GCK,WWP2,CAMK2D,CAMK2B,CAMK2A,SNCA,BDKRB1,PLA2G6,FKBP1B,PRKCE,PRNP,AHNAK,TRDN,TRPV2,CALM1,SRI,ABL1,DIAPH1,PTK2B,OXSR1,PDGFB,CTNNB1,FHL1,GSTO1,KIF5B,AKAP6,ANK3,HOMER1,JPH3,GJA1,JPH1,ATP1A1,FGF14,RYR2,IKBKB,CNTN1,CASR,P2RY12,PDE4D,CACNA1C,CACNA1D,CACNA1B,CABP1	SCN3B,SCN2B,SCN1B,CACNB2,CACNB4,ATG5,SCN5A,GCK,SCN4B,WWP2,PDPK1,TESC,SPTBN4,CAMK2G,CAMK2D,CAMK2B,CAMK2A,XCL1,SNCA,WFS1,PTPN6,PTPN3,F2,KCNAB1,CXCL11,CXCL12,CXCL10,CYBA,BDKRB1,SLC31A2,PLA2G6,FKBP1A,FKBP1B,TSPO,CHP1,HTT,PRKCE,PRNP,KCNJ2,ADCYAP1,KCNH2,KCNE1,KCNE2,KCNE3,KCNA5,DLG1,ADRB2,CREB3,ADORA1,EDNRA,SARAF,KCNQ1,KCNN2,PKP2,TGFB1,ARRB2,AHNAK,TRDN,SNTA1,MYO5A,TRPV2,ACTN4,ACTN2,INPP5K,TRPC1,TRPC3,LG…	-0.493924	0.00233372	0.0413803
ncRNA metabolic process(GO:0034660)	393	1045	84	16365	0.51	309	41662	0.74	POP5,PARS2,ELAC1,ELAC2,PPA1,LAS1L,TUT1,RPL26,VARS,TPRKB,FTSJ1,DIS3,CHD7,TRMT5,ZCCHC11,GATB,GATC,GARS,MPHOSPH10,WARS,THG1L,URM1,RPSA,RPS6,TRMT61B,RPL7,TDRD9,SNRPF,PNPT1,FCF1,RPP21,RPP40,LIN28A,GEMIN6,GEMIN5,GEMIN2,WDR55,DARS2,WDR12,DDX47,DDX56,DDX51,FRG1,UTP20,UTP18,TSEN2,HARS2,CDKN2A,HARS,TP53RK,NOP58,NOP56,RRP8,TRUB2,QTRT1,YARS2,WBP11,SMAD1,GMPS,DARS,PHAX,INTS8,INTS5,INTS6,PDCD11,RARS,LCMT2,RPL3…	SARS2,POP1,POP4,POP5,POP7,PARS2,ELAC1,ELAC2,PRMT5,ZBTB8OS,OSGEP,PPA2,PPA1,EEF1E1,LAS1L,TUT1,LARS2,RPL14,RPL11,MEPCE,QARS,SMN1,MARS,RPL26,EARS2,VARS,NUDT16,UTP14A,UTP14C,ADAR,NFKB1,TPRKB,TFB2M,TFB1M,FTSJ1,FTSJ3,DROSHA,DIS3,DKC1,TXNRD2,TXNRD1,IARS,IARS2,GTPBP3,DEDD2,MTO1,TSR3,TSR2,EMG1,RNASEL,TRNT1,CHD7,TRMT1,TRMT6,TRMT5,ZCCHC11,NHP2,PSTK,TBL3,WDR4,FDXACB1,DUS1L,DUS3L,DUS4L,GATB,GATC,WARS2,GARS,GAR…	-0.36808	0.00234798	0.0415194
regulation of homeostatic process(GO:0032844)	327	680	68	16381	0.41	259	41712	0.62	POT1,BCL10,NEU1,LRRK2,SCN5A,CAMK2D,ACOX1,SNCA,FCER1G,SLC30A2,SLC30A3,AGTR1,ID2,BDKRB1,EPHA5,PLA2G6,FKBP1B,PRKCE,EDNRB,TGFB2,TRDN,CA7,CA2,FOXO1,ERCC4,IL2RA,IBTK,ADAM17,CALM1,SRI,HOXA5,ABL1,DIAPH1,DCSTAMP,PTK2B,TERF2,ACVR2A,SMAP1,HIF1A,FHL1,GPR68,CCL21,CCL19,KITLG,GSTO1,PPP2R3C,LDLR,ETS1,AKAP6,SYBU,ANK3,ANKRD54,ALOX12,ACD,GJA1,HSPA1L,KLF13,HMGB2,YLPM1,RIPK3,RYR2,INHBA,FLCN,PDE4D,CACNA1C,ERO1A,NRXN1…	SCN3B,SCN2B,SCN1B,POT1,ATRX,PASK,ATG5,BCL10,FADD,NEU1,LRRK2,SCN5A,SIDT2,NR1H2,NR1H3,PDPK1,AVPR2,NR1D1,NR1D2,SLC25A23,PHPT1,CAMK2D,XCL1,ACOX1,SNCA,HCAR2,FCER1G,AP3D1,ITPR1,NEUROD1,SLC30A4,SLC30A2,SLC30A3,PTPN6,PTPN3,PTPRC,AGTR1,F2,PPP3CB,LMO2,CXCL11,C2CD2L,CXCL10,NDUFAF2,CYBA,ID2,BDKRB1,EPHA5,PLA2G6,FKBP1A,FKBP1B,TPCN2,TSPO,TNKS2,PRKCE,UBE2C,UBE2S,CORIN,ADORA1,EDNRA,EDNRB,BBC3,RORA,SPP1,SPI1,TGFB1…	-0.402654	0.00249841	0.0440592
morphogenesis of an epithelium(GO:0002009)	429	713	93	16356	0.57	336	41635	0.8	BTBD7,FRS2,BCL10,PAX2,SULF1,RSPO3,RSPO2,TBX20,CYR61,KLHL3,ILK,AR,FREM2,PLXND1,CHUK,BBS4,BBS7,HHIP,TBX3,TBX5,CSNK2B,FOXA1,CA2,SEMA3E,DCHS1,ARID1A,ESR2,ADAM17,HOXA5,CTHRC1,MYCN,IFT122,TFAP2A,GDF2,LHX2,CECR2,ACVR1,ENG,IGF1,HIF1A,COBL,PDGFB,SETDB2,ARHGAP12,PGF,CTNNB1,IFT172,PXN,SMAD4,BMP7,SPRY2,NFATC4,NFATC3,ROBO1,GATA4,MKKS,ROCK2,NOTCH4,GATAD2A,HAND1,HAND2,MAP3K7,JUP,TRIM28,IL10,CCM2,OSR1,GJA1,CXCR4…	BTBD7,PPP1CA,MTSS1,ENAH,FRS2,NET1,BCL10,PAX3,PAX2,PAX8,FRZB,PARD3,SULF1,OPA1,HGF,RSPO3,RSPO2,IPMK,VASP,NR3C1,TBX20,CYR61,TBX18,MED1,KLHL3,WT1,PAK1,PLET1,ILK,AR,LMO4,CXCL12,FREM2,VANGL2,CELSR1,EPHA2,TMTC3,PLXNA1,PLXNB2,PLXND1,HTT,CHUK,PRKD2,DLC1,MAGED1,TGIF1,SYNE4,JAG2,JAG1,DLL1,HHEX,DLL4,BBS4,BBS5,BBS7,DLG3,DLG5,DLG1,IRX3,MSX2,APAF1,PITX2,EDNRA,HHIP,RASIP1,TBX3,TBX2,TBX5,TBX4,WNT5A,SOX9,SOX8,WNT1…	-0.350165	0.00251383	0.0440908
regulation of chemokine production(GO:0032642)	45	107	4	16445	0.02	41	41930	0.1	ADORA2B,ADAM17,HIF1A,MYD88	TICAM1,TICAM2,FFAR3,MAVS,MEFV,MUL1,C5,KLF4,HMOX1,TIRAP,WNT5A,ADORA2B,APOD,SIGIRR,SNAI2,CSF1R,ADAM17,MAPK9,ADIPOQ,PYCARD,DDX3X,EIF2AK2,HIF1A,ZFPM1,IL1RL1,SLC37A4,GSTP1,MYD88,TLR2,TLR4,TLR7,IL4R,IL6R,IL1B,IL33,CD74,MAP2K5,LBP,TWIST1,RIPK2,C1QTNF3	-1.3913	0.00250857	0.0440908
protein targeting(GO:0006605)	580	1258	131	16318	0.8	449	41522	1.07	RPLP0,CACNB1,LRRK2,SPTBN1,ITGB1BP1,TONSL,RPL18,RPL19,RPL12,RPL35,RPL36,RPL39,NAGPA,RPL32,RPL34,RPL26,RPL23,RPL21,SYNGR1,IPO5,PPM1B,PAN3,PARL,TOMM7,TOMM6,KPNA5,KPNA3,KPNA1,MTX3,TMCO6,PICK1,IMMP2L,NDUFA13,RAB3IP,AP1M2,JAK2,RBM22,MICALL1,NFKBIA,TGFB3,TGFB2,BID,KCTD7,SPCS3,RPSA,RPS6,RPS5,RPL7,RPL6,TEK,RPL3,RPS2,MYO6,SRI,TM9SF1,MAPK7,ABRA,PEX26,PEX5L,GOLGA1,GOLGA4,PEX12,MFN2,ZFYVE16,IGF1,NOP58,LTBP2,M…	RPLP2,RPLP0,RPLP1,CACNB1,PARP1,LRRK2,ATG3,FAF1,MDFI,PARD3,FYB,SEC61B,TESC,SPTBN1,NLRP3,ITGB1BP1,PBLD,TONSL,BMPR1A,RPL18,RPL17,RPL19,RPL14,RPL15,RPL10,RPL11,RPL12,RANBP17,HGS,SMN1,RPL3L,RPL35,RPL36,RPL37,RPL39,NAGPA,RPL30,RPL32,RPL31,RPL34,RPL26,RPL27,RPL24,RPL28,RPL29,RPL23,RPL22,RPL21,SLC51B,MAVS,PIP5K1A,SYNGR1,SYNGR2,IPO9,ATG4C,IPO7,IPO5,PPM1A,PPM1B,AP3M1,MBTPS1,PAN3,PALM,ADAR,PARL,AP3B1,MED1,A…	-0.297871	0.0025352	0.0441071
regulation of membrane potential(GO:0042391)	356	787	75	16374	0.46	281	41690	0.67	SCN3A,SCN2A,SCN1A,CACNB3,CACNB4,LRRK2,SCN9A,ADRA1A,SCN7A,SCN5A,RAB3GAP1,WWP2,AFG3L2,CAMK2D,ATXN1,SNCA,ILK,CRTC1,CATSPER2,XK,TPCN1,KCNK2,SCN11A,KCND2,GRIK1,GRIK2,GRIK3,TRDN,NTSR2,ADAM22,SERINC5,NALCN,SRI,XIRP1,GRIN2A,NLGN4X,ABL1,PEX5L,SPG20,PTK2B,FHL1,HCN1,CHRNA6,KIF5B,ACSBG1,PPP2R3C,CLIC1,PPARD,AKAP6,ANK3,NDUFS1,LAMA2,JUP,ALOX12,EHD3,GJA1,POPDC2,ATP1A1,EGR2,RYR2,BNIP3,MAL,RIMS2,RIMS1,PMAIP1,GLRB,…	SCN3A,SCN3B,SCN2B,SCN2A,SCN1A,SCN1B,CACNB3,CACNB4,CACNG4,CFTR,CACNG2,ARHGEF10,ATRN,LRRK2,SCN9A,ADRA1A,SCN8A,SCN7A,SCN5A,SCN4B,SCN4A,RAB3GAP1,WWP2,AFG3L2,PIEZO1,PIEZO2,PARD3,SLC25A27,CAMK2D,PARK7,ATXN1,ACHE,SNCA,BDNF,PTPN3,BVES,ILK,CRTC1,OPRM1,PPP3CA,KLK6,CATSPER2,CATSPER3,XK,BCO2,TPCN1,TPCN2,SOD1,SOD2,TSPO,HTT,PRKCZ,KCNK6,KCNJ2,ADCYAP1,KCNK2,KCNH1,KCNH8,SCN11A,KCNH2,KCNH3,KCNE1,KCNE2,KCNC2,KCND3,…	-0.3863	0.00253347	0.0441071
post-embryonic development(GO:0009791)	100	130	15	16434	0.09	85	41886	0.2	SCN9A,ACADM,SGPL1,NR4A2,DDX17,APOB,MORC3,TP73,CSRNP1,ACVR2B,RC3H2,IREB2,DICER1,AGO2,MUT	DHCR7,ATG7,SCN9A,ATF5,ACADM,SGPL1,PYGO1,PYGO2,TET2,PLEKHA1,TIPARP,ITPR1,DSCAM,NR4A2,KLF4,SOD2,TMTC3,SLC18A2,IMPAD1,SCUBE1,SOX6,MYO1E,TBCE,DDX17,APOB,TAL2,MYO7A,CHST11,SEMA3C,MORC3,FOXP2,ETNK2,ERCC1,ERCC2,BCL2L11,TGFBR1,ARID5B,MYL2,USP9X,MECP2,MECOM,TP73,HEG1,CCDC47,CCDC66,STK36,CSRNP1,ALDH5A1,ACVR2B,PPP1R13L,VEGFA,PLAGL2,RC3H2,SLC37A4,GNAQ,GNAS,IREB2,BMP4,SMAD2,INPPL1,SERPINA7,HMGN1,SZT2,PRDM1,NP…	-0.799002	0.00253354	0.0441071
actin filament organization(GO:0007015)	290	784	59	16390	0.36	231	41740	0.55	PAWR,MSRB2,SPTBN1,ITGB1BP1,CFL2,SH3BGRL3,SPTAN1,PICK1,PRKCE,JMY,JAK2,SPTB,ERMN,WASL,PLEK,TTN,TRPV4,ACTR3,ACTR2,ARHGAP6,ARF1,ABI2,ABL1,FHOD1,RND1,PPFIA1,DIAPH1,SSH2,PTK2B,ELN,WASF3,WASF2,EVL,TPM1,AMOT,PACSIN1,COBL,MYADM,CCL21,LIMK1,CAPZB,ROCK1,ROCK2,MICAL3,RDX,PPP1R9A,AIF1,RGCC,HCLS1,WIPF1,SLIT2,CUL3,PDXP,PHACTR1,TRIOBP,SPIRE2,ARPC5L,DPYSL3,LMOD2	KISS1R,ARHGEF15,ARHGEF10,MTSS1,ENAH,PAWR,ALMS1,MSRB1,MSRB2,NEBL,SPTBN5,SPTBN4,SPTBN2,SPTBN1,ITGB1BP1,CFL2,PECAM1,ARHGEF2,CAPZA2,CAPZA1,TWF1,TWF2,VASP,PPM1F,PPM1E,HCK,SH3BGRL3,ADD2,ADD1,PAK2,PAK3,GSN,PAK1,SPTAN1,CXCL12,SPECC1L,AVIL,EPHA1,GHSR,PICK1,MTOR,ZYX,PRKCI,PRKCE,PRKCD,DLC1,LATS1,JMY,PLEKHH2,TTC17,CORO7,CDC42,DLG1,JAK2,AP1AR,MICALL2,TENM1,WNT11,SYNPO,GAS7,MLST8,ARRB1,SPTB,MYO1B,ERMN,WASL,BIN…	-0.430092	0.00256789	0.044262
cellular modified amino acid metabolic process(GO:0006575)	198	532	37	16412	0.22	161	41810	0.38	DHFR,SLC25A32,DDAH2,DDAH1,CKMT2,TDO2,MTRR,SLC5A6,GGACT,GGCT,VNN1,VNN2,GART,PLS1,SHMT1,SERINC5,SERINC1,FPGS,ALDH7A1,CTH,CPQ,GLRX2,MTHFD1,P4HA2,KYNU,GSTA4,GOT2,CKMT1B,CPS1,PCYOX1,CRYM,EGLN3,PLA2G16,MUT,DNMT3A,PLOD1,ERO1A	GHR,PAX8,ATIC,PPCS,DHFR,SLC25A32,PARK7,DDAH2,DDAH1,PRODH,CKMT2,FTCD,DUOX2,DUOX1,MED1,DIO1,GSS,GSR,TDO2,HAGHL,AASDHPPT,MTRR,FOLH1,COASY,G6PD,PLA2G5,SOD1,SOD2,FOLR1,HTT,HPN,SLC5A6,GGACT,GGCT,PCYOX1L,CHDH,GGT5,GGT7,IYD,SLC6A8,MGST1,MGST2,VNN1,VNN2,GATM,GART,PLSCR1,GAMT,APIP,CBS,IDH1,HOGA1,MAT1A,PLS1,SHMT1,SHMT2,MAT2A,MAT2B,SERINC3,SERINC2,SERINC5,SERINC1,CKB,SLC19A1,PCMT1,FPGS,ALDH7A1,CTH,CPQ,GLRX2,…	-0.535364	0.00255209	0.044262
regulation of leukocyte migration(GO:0002685)	101	212	15	16434	0.09	86	41885	0.2	PTPRJ,BDKRB1,KCTD7,ADAM17,HOXA7,PTK2B,CCL20,CCL21,CCL19,BMP5,THBS4,AIF1,SLIT2,RIPK3,MSN	FADD,C5AR2,CAMK1D,PECAM1,PTPRJ,XCL1,PLVAP,F7,C5,CXCL12,CXCL10,MTUS1,BDKRB1,PLA2G7,HMOX1,JAM3,CREB3,ADORA3,ADORA1,EDNRA,TIRAP,WNT5A,GAS6,APOD,KCTD7,IL23A,LGALS3,ADAM10,ADAM17,HOXA7,ITGA2,PYCARD,PTK2B,STK10,PLCB1,EDN3,EDN1,VEGFB,VEGFD,VEGFA,GREM1,NOD2,CCL28,CCL25,CCL20,CCL21,SELP,CCL19,ECM1,BMP5,SERPINE1,RAC2,RAC1,ICAM1,CMKLR1,THBS1,THBS4,TLR2,C1QBP,AIF1,IL6R,IL33,CCR2,ADA,CD74,CCR1,CXCR3,LBP,PADI2…	-0.810722	0.00257146	0.044262
myeloid leukocyte migration(GO:0097529)	101	250	15	16434	0.09	86	41885	0.2	PTPRJ,FCER1G,EDNRB,TGFB2,ITGA9,PTK2B,PDGFB,CCL21,CCL19,THBS4,AIF1,FLT1,SLIT2,PDE4D,CXADR	C5AR2,C5AR1,CAMK1D,PTPRJ,PTPRO,ARHGEF5,VAV3,VAV1,XCL1,PIP5K1C,FCER1G,C5,CXCL12,MTUS1,PLA2G7,PRKCA,JAM3,CREB3,EDNRA,EDNRB,TIRAP,SPP1,TGFB2,MYO9B,CSF3R,SYK,IL23A,NUP85,LGALS3,JAGN1,ITGB2,ITGAM,ITGA1,ITGA9,SCG2,PTK2B,PREX1,EDN3,EDN1,VEGFB,VEGFD,VEGFA,PDGFB,GREM1,SLC37A4,NOD2,CCL21,CCL19,S100A9,SERPINE1,RAC2,RAC1,HRH1,RPS19,CMKLR1,THBS1,THBS4,C1QBP,AIF1,IL6R,IL1B,CCR2,CD74,CCR1,KIT,CX3CL1,LBP,FLT1,RA…	-0.810722	0.00257146	0.044262
DNA repair(GO:0006281)	513	1582	114	16335	0.69	399	41572	0.95	PARP9,PARP4,FAN1,EEPD1,FTO,MDC1,XPC,TONSL,ATXN3,SMC6,ZRANB3,SUMO1,MC1R,MBD4,UBE2W,XRCC5,XRCC4,XRCC3,XRCC2,JMY,NEIL3,YY1,TMEM161A,RBM14,MMS22L,PSMC6,MCM9,SETMAR,PSME4,MSH6,MSH3,MSH2,MSH5,MSH4,VPS4A,ASCC3,CSNK1E,APLF,DMC1,DTX3L,ERCC5,ERCC4,BRE,USP7,USP3,CINP,EPC2,LIG3,TP73,PMS1,ASF1A,ABL1,IER3,HELQ,SWSAP1,GTF2H4,WDR48,UCHL5,POLH,POLE,POLB,POLM,POLQ,TAOK1,CDKN2D,UBE2V1,HUS1,UBE2D3,DCLRE1A,SFR1,UPF1,…	TFPT,PARP9,PARP3,PARP4,PARP1,PARP2,FANCD2,FAN1,ATRX,SHPRH,PRMT6,CUL4A,CUL4B,EEPD1,BAZ1B,FTO,SUPT16H,EMSY,MDC1,SLX4,XPA,XPC,ENDOV,HINFP,TONSL,ATXN3,WRNIP1,MMS19,SMG1,NGLY1,SMC5,SMC6,SMC3,ZRANB3,NUDT16,SUMO1,MUM1,AXIN2,SLC30A9,WRN,MEN1,TDP2,TDP1,MC1R,CIB1,TTC5,NSMCE1,NSMCE2,MBD4,UBE2A,PRKCG,UBE2B,UBE2N,UBE2W,UBE2T,PRKDC,XRCC5,XRCC4,XRCC3,XRCC2,XRCC6,XRCC1,EME2,EME1,JMY,NEIL3,NEIL1,MTA1,UIMC1,FIGNL1…	-0.318646	0.00259428	0.0443012
divalent metal ion transport(GO:0070838)	344	987	72	16377	0.44	272	41699	0.65	CACNB1,CACNB2,CACNB3,CACNB4,SLC3A2,ADRA1A,FYN,SLC25A25,NIPAL4,CAMK2D,CAMK2B,CAMK2A,SNCA,ITPR2,CATSPER2,BDKRB1,PLA2G6,FKBP1B,TPCN1,PRKCE,AHNAK,TRDN,IBTK,TRPV2,TRPV4,LOXHD1,TRPM7,TRPM1,OLA1,TRPC4,CALM1,NALCN,PKD2L1,PKD2L2,SRI,RAMP3,GRIN2A,ABL1,DIAPH1,PTK2B,TPT1,PDGFB,CTNNB1,CCL21,CCL19,DRG2,CHRNA7,GSTO1,SLC24A3,SLC24A2,AKAP6,HOMER1,JPH3,GJA1,JPH1,GPM6A,CUL5,RYR2,ATP2B1,ATP2B3,ATP2A1,CASR,P2RY12,PDE…	GEM,CACNB1,CACNB2,CACNB3,CACNB4,ORAI3,CACNG8,CACNG7,CACNG5,SLC3A2,CACNG4,CACNG2,CACNG1,ATG5,ADRA1A,PDPK1,FYN,SLC25A25,NIPAL3,NIPAL2,NIPAL1,NIPAL4,CAMK2G,CAMK2D,CAMK2B,CAMK2A,XCL1,SNCA,ITPR3,ITPR1,ITPR2,WFS1,PTPN6,PTPRC,F2,OPRM1,PPP3CA,CXCL11,CXCL12,CXCL10,CYBA,GTPBP4,GTPBP8,CATSPER2,CATSPER3,BDKRB1,PLA2G6,FKBP1A,FKBP1B,TPCN1,TPCN2,CYP27B1,TSPO,HTT,PRKCE,PRKCB,KCNJ2,MICU1,NIPA2,NIPA1,CREB3,RASL11B…	-0.394537	0.00259105	0.0443012
muscle system process(GO:0003012)	343	771	72	16377	0.44	271	41700	0.65	NEU1,ADRA1B,ADRA1A,SCN7A,SCN5A,CAMK2D,CAMK2B,SULF2,SULF1,CKMT2,TBX20,BDKRB2,PLA2G6,FKBP1B,CHUK,MSTN,EDNRB,ATP8A2,ADORA2B,TRDN,TTN,CFLAR,BMP10,HEY2,AKAP13,CALM1,SRI,MYOT,TPM1,TPM4,IGF1,MYBPC1,RPS6KB1,PXN,SMAD5,GTF2I,CNN1,GSTO1,LTB4R,GATA6,GATA4,AKAP6,MKKS,ROCK1,ROCK2,CMYA5,HOMER1,DTNA,AIF1,COL14A1,RGS2,GSK3B,IL15,GJA1,TRIM63,NCF1,FLII,MAP2K3,GUCY1A3,LMCD1,ATP1A1,GTF2IRD1,DAPK3,RYR2,ATP2A1,PDE4D,PD…	SCN3B,SCN2B,SCN1B,CACNG1,ARHGEF11,NEU1,HDAC4,ADRA1B,TBXA2R,ADRA1A,SCN7A,GAA,SCN5A,SCN4B,SCN4A,IL6ST,CAMK2G,CAMK2D,CAMK2B,SULF2,SULF1,SMPX,CKMT2,ACHE,TBX20,SMTN,PGAM2,MYLK2,PPP3CA,MB,PABPN1,CYBA,PRKG1,BDKRB2,GHSR,KLF4,PLA2G6,FKBP1A,FKBP1B,TPCN2,SOD1,MTPN,CHUK,PRKCA,KLHL41,KCNJ2,MSTN,KCNH2,HMOX1,DLG1,BBS2,ADRB2,ADORA1,EDNRA,EDNRB,KCNQ1,MYL6B,SLC6A8,ATP8A2,MEF2C,USP19,GAMT,ADORA2B,SNTB1,TBCE,TRDN,SN…	-0.390829	0.0025898	0.0443012
positive regulation of B cell activation(GO:0050871)	51	99	5	16444	0.03	46	41925	0.11	IL7,PELI1,GPR183,PPP2R3C,CD40	TICAM1,SASH3,TNIP2,VAV3,TBX21,PTPRC,IL7,BCL6,TCF3,TIRAP,MEF2C,BTK,TGFB1,SYK,WHSC1,CLCF1,INPP5D,IL13RA1,CARD11,PAXIP1,CDKN1A,TNFSF13B,STAT5A,STAT5B,PELI1,GPR183,NOD2,CHRNB2,BMI1,PPP2R3C,NFATC2,PRDM1,TLR4,ATP11C,IL13,BAD,CD40,CD38,ADA,CD74,CD27,TNFRSF4,EXOSC3,NCKAP1L,TNFSF13,STAT6	-1.28328	0.0026402	0.0449668
embryonic organ development(GO:0048568)	388	638	83	16366	0.5	305	41666	0.73	FRS2,PAX2,HS6ST1,RSPO3,TBX20,NR2F2,CYR61,SLITRK6,ID2,MYO15A,BBS4,BBS7,CHD7,TBX3,ATP8A2,MMP16,TGFB3,TGFB2,ARID1A,HEY2,GAB1,MYO6,HOXA1,HOXA2,HOXA5,HOXA7,SP3,CTHRC1,MYCN,IFT122,TFAP2A,EPN2,PCDH12,WDR48,ACVR1,ENG,PLCD1,HIF1A,COBL,ZFPM2,PDGFB,SETDB2,CTNNB1,KITLG,WDPCP,IFT172,BMP7,FGF9,CLIC5,SPRY2,GATA4,MKKS,MKL2,TNRC6C,HAND1,HAND2,CSF2,TRIM28,IL10,SMARCA4,OSR1,KAT6A,GJA1,GJB6,NPHP3,DVL3,ZIC1,ZIC3,CRB2…	FRS2,NET1,TFEB,PAX6,PAX2,PAX8,FRZB,MDFI,ZFP36L1,HS6ST1,GFI1,BMPR1A,NAGLU,HLX,RSPO3,SH2B3,TBX20,NR2F2,CYR61,TBX15,TBX18,MED1,NEUROD1,SLITRK6,DSCAML1,AXIN1,NFE2,MEN1,HYAL1,PKDCC,WNT9A,LMO2,PRKRA,ID2,ID3,VANGL2,EPHB2,CELSR1,EPHA2,KLF1,SOBP,TH,BIRC6,SOD1,HPN,MYO15A,DLL1,HHEX,BBS4,BBS5,BBS7,NIPBL,DLG1,IRX5,CHD7,PITX2,COL11A1,TBX3,TBX2,TBX1,WNT5A,SOX9,KCNQ4,ATP8A2,SETD2,MEF2C,VPS52,FOXF1,FOXH1,MMP16,MM…	-0.366992	0.00264778	0.0449775
negative regulation of cell proliferation(GO:0008285)	607	1318	138	16311	0.84	469	41502	1.12	HDAC2,ADRA1A,PAWR,ATP5A1,ITGB1BP1,SULF1,PTPRJ,PTPRK,XDH,NR2F2,ILK,LZTS2,AR,ID2,PDS5B,BCHE,PRNP,IRF1,PDCD1LG2,CDC73,JAK2,RBM38,DFNA5,TBX5,SLC6A4,SOX7,CD276,CD274,BTG3,ATP8A2,GAS8,EREG,CSNK2B,TGFB3,TGFB2,FNTB,BMPR2,FBXW7,WARS,NDFIP1,MORC3,FOXJ1,IL2RA,CNOT8,ESR2,ATRAID,RAPGEF2,SFN,RNF10,XIRP1,MARVELD3,IFT122,TFAP2A,SKAP2,IFT88,GDF2,MFN2,FAP,NME1,CLMN,PTK2B,KANK2,EAF2,VHL,UTP20,ENG,PODN,C10orf54,ACVR…	KISS1R,MTSS1,NR2E1,IFITM1,HDAC4,HDAC2,ADRA1A,PAX6,PAWR,ADARB1,FRZB,CUL4A,NELL1,JARID2,EEF1E1,ATP5A1,EMP3,TP53I11,TESC,ITGB1BP1,MDM4,PBLD,SULF1,PTPRJ,PTPRK,PTPRM,PTPRU,ADAMTS8,HGS,XDH,XCL1,PPM1D,TSPAN32,BDNF,COPS8,NR2F2,MED1,TFAP4,WT1,FTH1,AXIN2,PTPN6,PTPN2,MEN1,PAK1,ILK,OPRM1,LZTS2,AR,IL12A,WNT9A,CIB1,PRKRA,ID2,GTPBP4,IFI30,KLF4,MTBP,CYP27B1,BCL6,PDS5B,SOD2,TSPO,PLXNB1,BCHE,IGFBP6,PRKCA,PRNP,HRG,…	-0.289447	0.00272157	0.0458784
regulation of peptidase activity(GO:0052547)	347	955	73	16376	0.44	274	41697	0.65	TFPI,BCL10,PAX2,XDH,SNCA,CYR61,CYCS,EPHA7,TRIAP1,TF,CYFIP2,NDUFA13,JAK2,SOX7,PSME1,PSME4,CYTB,C4A,ACER2,USP14,BID,AKIRIN2,BCL2L13,AQP1,SFN,NLE1,TPD52L1,UCHL5,CASP8AP2,ACVR1C,SPOCK1,EIF2AK3,CDKN2A,CDKN2D,CDKN1B,NOD1,RPS6KA1,TRADD,KIAA0141,DHCR24,FASLG,SERPINE3,SERPINI2,SERPINA5,SERPINA3,SERPINA1,SERPINB9,SERPINC1,RAF1,PPARG,ROBO1,APOPT1,TNFAIP8,PPP1R9A,RIPK1,ALOX12,RPS27L,NRDC,SPINK6,CRB2,CDH1,PTT…	TFPI,ANP32B,AIFM1,NLRC4,BCL10,FADD,BEX3,PAX2,FBLN1,FN1,NLRP3,NLRP1,MDM2,PARK7,HGF,XDH,PPM1F,SNCA,CYR61,MEFV,CST9L,TFAP4,MUL1,MEN1,PAK2,GPI,PCID2,F3,WNT9A,C3,C5,PCOLCE,NR4A1,CYCS,IFI16,HIP1,EPHA7,KLF4,TRIAP1,TF,WFIKKN1,BIRC6,BIRC3,BIRC2,MTCH1,CYFIP2,SORL1,NGFR,HRG,DLC1,NDUFA13,PCOLCE2,HERPUD1,SEBOX,JAK2,APAF1,ADRM1,SOX7,BBC3,PSME1,PEBP1,PSME3,PSME4,CYTB,PSMF1,C4A,SPP2,ACER2,FNIP1,GAS6,USP14,MMP14,…	-0.388056	0.00272287	0.0458784
regulation of cell morphogenesis involved in differentiation(GO:0010769)	269	559	54	16395	0.33	215	41756	0.51	LRRK2,PAX2,ITGB1BP1,CFL2,CAMK2B,MAPT,PTPRD,ILK,LZTS1,TTC3,XK,EPHB3,CHN1,TBX5,ELL3,TGFB3,TGFB2,BMPR2,FOXA1,TNR,TRPV2,DCC,PDLIM5,RAPGEF2,ACTR3,CAPRIN2,RNF6,SSH2,SPG20,CTNNB1,MYADM,LIMK1,SMAD4,SMAD1,BMP5,ROBO1,ROBO2,RTN4,KIF13B,EZH2,GSK3B,LRP8,LRRC4C,PTK2,RGCC,GORASP1,CRB2,SLIT2,EPB41L5,TRIOBP,ULK1,ULK2,DAB2IP,GCNT2	BARHL2,KNDC1,NR2E1,NET1,LRRK2,ARHGDIA,SARM1,PAX2,PAX8,ANAPC2,FN1,ITGB1BP1,CFL2,PBLD,CAMK2B,NEFM,PTPRO,SDHAF2,MAPT,ARHGEF1,ARHGEF7,NRCAM,TWF2,ACHE,BDNF,DSCAM,AXIN2,PAK3,PTPRD,ILK,LZTS1,CXCL12,CIB1,TTC3,XK,EPHB3,EPHB2,EPHA3,EPHA4,CHN1,PLXNA3,PLXNA4,PLXNB1,PLXNB2,LDLRAD4,NGFR,NGEF,HPN,POFUT2,PPP2CA,CDC42,AP1AR,BCL9L,TBX5,ELL3,WNT5A,MARK2,SIPA1L1,SPP1,TGFB3,TGFB1,TGFB2,BMPR2,FBXW8,GRIN1,FOXA1,APOE,SE…	-0.446787	0.00273626	0.0458784
carboxylic acid transport(GO:0046942)	269	601	54	16395	0.33	215	41756	0.51	CACNB4,SLC3A2,NEU1,SLC25A32,SLC25A13,SLC25A15,SNCA,XK,BDKRB2,PLA2G6,PLA2R1,SLC5A6,PQLC2,SLC6A12,SLC6A13,ABCC3,ABCC2,SLC17A8,SNAP25,GRIK1,SERINC5,SERINC1,TRPC4,MYO6,ARG1,SLC1A4,SLC1A7,GRM2,HNF1A,STXBP1,SLC27A2,SLC27A5,SLC27A4,SLC38A7,SLC38A6,NCOR1,PPARD,PPARG,PLIN2,SYT1,GOT2,CPT2,SLC22A4,SLC22A8,SLC23A1,SLC23A2,SLC38A11,CRYM,LAT2,CROT,SLC13A3,RIMS1,SLC7A6,DPYSL2	CACNB4,KISS1R,SLC3A2,NEU1,ABCB11,SFXN5,SLC16A3,SLC16A2,SLC16A5,SLC16A4,SLC16A7,SLC16A6,SLC25A20,SLC16A1,SLC25A22,SLC25A26,SLC25A32,SLC25A12,SLC25A11,SLC25A13,SLC25A10,SLC25A15,SLC25A17,SLC51B,SLC51A,SNCA,BDNF,SLC15A4,GLS,ACSL1,ACSL4,ACSL3,ACSL6,XK,BDKRB2,PLA2G6,PLA2G5,APBA1,SLC22A16,FOLR2,FOLR1,HTT,PLA2R1,SLC5A6,CPT1B,CPT1A,PQLC2,SLC6A11,SLC6A12,SLC6A13,SLC6A14,SLC6A15,SLC6A17,ADORA1,SLC32A1,MCAT…	-0.446787	0.00273626	0.0458784
cytokine secretion(GO:0050663)	109	310	17	16432	0.1	92	41879	0.22	CD276,CD274,KCTD7,APOA2,TEK,SRGN,ABL1,BTN3A2,IFNAR1,CCL19,TRIM16,IL10,RGCC,CD14,RAB1A,ANGPT1,ANXA4	NLRC4,ATG5,C5AR2,NLRP3,NLRP1,FFAR4,TLR10,CRTAM,HYAL2,C5,ABCA1,PRKCZ,IRF3,WNT5A,CD276,CD274,GAS6,CLEC9A,CD2,CHI3L1,CSF1R,KCTD7,SYK,APOA2,TEK,CLEC6A,SRC,SRGN,CRP,TNFRSF21,P2RX7,ABL1,ABL2,BTN2A2,BTN3A1,BTN3A2,PYCARD,HTR2B,FGR,LGR4,IFNAR1,F2R,SSC5D,IL1RL1,CIDEA,RBPJ,VTCN1,NOD2,CCL19,PNP,NOX5,GATA3,GPAM,LCP2,NOTCH2,NOTCH1,TLR1,TLR2,TLR4,TLR5,TLR6,TLR8,IL4R,LRRC32,TRIM16,TRIM27,RNF19B,IL10,IL1A,IL26,IL…	-0.753021	0.00270901	0.0458784
organic acid transport(GO:0015849)	270	605	54	16395	0.33	216	41755	0.51	CACNB4,SLC3A2,NEU1,SLC25A32,SLC25A13,SLC25A15,SNCA,XK,BDKRB2,PLA2G6,PLA2R1,SLC5A6,PQLC2,SLC6A12,SLC6A13,ABCC3,ABCC2,SLC17A8,SNAP25,GRIK1,SERINC5,SERINC1,TRPC4,MYO6,ARG1,SLC1A4,SLC1A7,GRM2,HNF1A,STXBP1,SLC27A2,SLC27A5,SLC27A4,SLC38A7,SLC38A6,NCOR1,PPARD,PPARG,PLIN2,SYT1,GOT2,CPT2,SLC22A4,SLC22A8,SLC23A1,SLC23A2,SLC38A11,CRYM,LAT2,CROT,SLC13A3,RIMS1,SLC7A6,DPYSL2	CACNB4,KISS1R,SLC3A2,NEU1,ABCB11,SFXN5,SLC16A3,SLC16A2,SLC16A5,SLC16A4,SLC16A7,SLC16A6,SLC25A20,SLC16A1,SLC25A22,SLC25A26,SLC25A32,SLC25A12,SLC25A11,SLC25A13,SLC25A10,SLC25A15,SLC25A17,SLC51B,SLC51A,SNCA,BDNF,SLC15A4,GLS,ACSL1,ACSL4,ACSL3,ACSL6,XK,BDKRB2,PLA2G6,PLA2G5,APBA1,SLC22A16,FOLR2,FOLR1,HTT,PLA2R1,SLC5A6,CPT1B,CPT1A,PQLC2,SLC6A11,SLC6A12,SLC6A13,SLC6A14,SLC6A15,SLC6A17,ADORA1,SLC32A1,MCAT…	-0.451452	0.00276034	0.0461618
leukocyte mediated immunity(GO:0002443)	223	661	43	16406	0.26	180	41791	0.43	BCL10,FCER1G,C2,XRCC4,ZBTB1,AP1G1,MSH6,MSH2,C4A,ADORA2B,MYO1G,APLF,NDFIP1,KCTD7,FOXJ1,ADAM17,CLU,CR2,BTN3A3,BTN3A2,C10orf54,GNL1,PI4K2A,SERPINB9,C4BPB,C4BPA,MYD88,BATF,MLH1,SH2D1B,MAP3K7,RAB27A,THOC1,IL10,HLA-A,HLA-B,HLA-F,CD40,CD55,NCF1,LAT2,RIPK3,NCR3	BCL10,FADD,SLA2,SASH3,PDPK1,HFE,XCL1,FCER1G,FCER1A,TBX21,PTPN6,PTPRC,CRTAM,IL12A,C7,C9,C3,C6,C5,PPP3CB,C2,VAMP7,BCL3,BCL6,PRKCD,PRKCZ,MBL2,HPX,IRF7,XRCC4,CD226,ZBTB1,AP1G1,JAG1,HMOX1,DLG1,JAK3,ADORA3,MALT1,RASGRP1,MSH6,MSH2,BTK,FOXF1,C4A,GAPT,C8A,C8B,TGFB1,ARRB2,ADORA2B,IL12RB1,MYO1G,MYO1F,APLF,CEBPG,BCR,PRAM1,NDFIP1,KCTD7,FOXJ1,C1R,C1S,POU2F2,ERCC1,MASP2,SYK,IL23A,WHSC1,CLCF1,TRPM4,INPP5D,DBH,GA…	-0.496723	0.00276743	0.0461618
T cell differentiation(GO:0030217)	171	353	31	16418	0.19	140	41831	0.33	SOCS5,IL7,IRF1,XRCC4,ZBTB1,CHD7,ITK,VNN1,FOXJ1,IL2RA,TESPA1,RPS6,ADAM17,SP3,ABL1,CDKN2A,RC3H2,RC3H1,CTNNB1,CCL19,NCOR1,BATF,JMJD6,IL15,APC,FLT3,RIPK3,EGR1,ZEB1,GLI2,GLI3	SART1,ZAP70,FADD,SASH3,ZFP36L1,ZFP36L2,HLX,RPL22,TBX21,AP3B1,AP3D1,ITPKB,SATB1,SOCS5,PTPN2,PTPRC,PATZ1,IL12A,PPP3CB,IL7,TNFSF9,TNFSF8,FUT7,BCL3,BCL6,SOD1,ZC3H8,PRKCZ,PRKDC,GIMAP1,IRF1,IRF4,XRCC4,TCF3,ZBTB1,JAG2,CHD7,JAK3,SLC46A2,CYLD,ITK,RORC,RORA,VNN1,NFKBID,TXK,TGFB1,IL12RB1,CD2,CD4,CAMK4,SEMA4A,BLM,FOXJ1,IL2RA,TESPA1,SYK,IL23A,TGFBR2,RPS6,NKAP,ADAM17,SPN,SRF,SOX13,SP3,LIG4,TP53,CARD11,ABL1,ABL…	-0.572396	0.00281539	0.0468412
regulation of neuron death(GO:1901214)	236	464	46	16403	0.28	190	41781	0.45	LRRK2,SIGMAR1,FYN,CNTFR,SNCA,ILK,NR4A2,EPHA7,XRCC4,XRCC2,JAK2,MSH2,GRIK2,TGFB3,TGFB2,FBXW7,DCC,SET,CLU,TM9SF1,TP73,TFAP2A,ABL1,GRM4,PTK2B,LGMN,HIF1A,STXBP1,CTNNB1,GPR75,OXR1,DHCR24,FASLG,ROCK1,ATM,AXL,GABRB2,EGR1,ITSN1,CASP3,CASP7,EGLN3,PMAIP1,ANGPT1,NAE1,CHMP4A	BARHL1,ADNP,LRRK2,SARM1,C5AR1,CPEB4,SIGMAR1,FYN,STAMBP,PARK7,PPT1,CNTFR,NR3C1,SNCA,BDNF,WFS1,NRBP2,PAK3,GPI,ILK,NR4A2,EPHB1,EPHA7,G6PD,CHL1,SOD1,SOD2,CHP1,HTT,SORL1,PRKCI,PRKCG,FAIM2,XRCC4,XRCC2,UNC5B,CDC42,HMOX1,RRAS2,JAK2,CDC34,MCL1,BBC3,BTG2,MSH2,MEF2C,GRIK2,GRIK5,TGFB3,TGFB2,ASCL1,FBXW7,GRIN1,PM20D1,APOE,GRID2,MAP3K11,FOXO3,BCL2L11,AKT1S1,CLCF1,DCC,SET,CLU,TM9SF1,TNFRSF1A,MECP2,LIG4,TOX3,TP53…	-0.483405	0.00285121	0.0473155
blood circulation(GO:0008015)	395	825	85	16364	0.52	310	41661	0.74	NEU1,ADRA1B,ADRA1A,SCN5A,ITGB1BP1,CAMK2D,DDAH1,PTPRJ,MANF,TBX20,AGTR1,CYP2J2,AR,ACSM3,ID2,BDKRB1,BDKRB2,PLA2G6,FKBP1B,YES1,BBS4,CHGA,CHD7,JAK2,EDNRB,SLC6A4,EPHX2,TGFB2,ADORA2B,BMPR2,TRDN,TTN,BMP10,TEK,HEY2,CALM1,SRI,ABAT,IER3,F11R,HTR1B,COL1A2,ELN,POMC,ENG,TPM1,AMOT,E2F4,WNK1,PDGFB,SREBF1,PTGS1,RPS6KA2,SMAD5,GSTO1,PPARD,PPARG,GATA4,MKKS,CPS1,JUP,RGS2,ALOX12,GJA1,POPDC2,NPY4R,FLI1,MAP2K3,GUCY1A3,G…	SCN3B,SCN2B,SCN1B,CFTR,ATG5,NEU1,HDAC4,ADRA1B,TBXA2R,ADRA1A,ADM2,ADRA1D,GAA,ADH5,SCN5A,SCN4B,SCPEP1,AVPR2,MEOX2,EMP2,SPTBN4,ITGB1BP1,CAMK2D,DDAH1,PTPRJ,PTPRM,PTPRO,MANF,FFAR3,HBB,ACE2,TBX20,SLC4A5,NFE2,BVES,AGTR1,MYLK2,F5,CYP2J2,AR,ACSM3,CXCL12,CXCL10,PRCP,OLR1,CYBA,ID2,PRKG1,BDKRB1,BDKRB2,PLA2G6,TH,FKBP1B,SOD1,SOD2,PRKCA,YES1,KCNK6,KCNJ2,ADCYAP1,KCNJ8,KCNH2,KCNE1,KCNE2,DLL4,BBS4,KCNA5,CYB5R3,COR…	-0.359439	0.00289549	0.0476835
myeloid leukocyte differentiation(GO:0002573)	163	350	29	16420	0.18	134	41837	0.32	LRRK1,FOS,ID2,CHUK,CA2,NDFIP1,INPP4B,OCSTAMP,HOXA7,SP3,NME2,DCSTAMP,SNX10,MMP9,CTNNB1,GPR68,IREB2,KITLG,PPARG,RASSF2,BATF,RIPK1,CSF2,HCLS1,APC,PRDM16,ASXL2,INHBA,CASP8	PARP1,FADD,LRRK1,TFE3,CUL4A,TESC,CBFA2T3,FOS,MED1,PTPN2,OSTM1,IFI16,TNFSF9,ID2,EPHA2,CHUK,PRKCA,L3MBTL3,IRF7,IRF4,HHEX,CDC42,CREB1,FAM20C,MEF2C,SPI1,TGFB1,CA2,CD109,CEBPE,CAMK4,TAL1,NDFIP1,CSF1R,IL23A,TGFBR2,NKAP,INPP4B,INPP5D,GAB2,GAB3,MITF,OCSTAMP,SRC,HOXA7,CALCR,SP3,JAGN1,MYH9,ADIPOQ,ZBTB46,ITGAM,NME2,DCSTAMP,PAFAH1B1,IL31RA,OGT,ESRRA,ZFPM1,SNX10,STAT5A,VEGFA,RBP1,RBPJ,MMP9,HAX1,CTNNB1,PIR,GNA…	-0.595263	0.00289243	0.0476835
regulation of chemotaxis(GO:0050920)	119	243	19	16430	0.12	100	41871	0.24	PTPRJ,AGER,TF,PRKD1,USP14,BMPR2,ADAM17,PTK2B,PDGFB,CCL21,CCL19,ROBO1,ROBO2,THBS4,AIF1,IL16,CXCR4,SLIT2,CASR	C5AR2,CAMK1D,PTPRJ,PTPRO,XCL1,PPM1F,DSCAM,PTPN2,F7,F3,C5,CXCL12,CXCL10,MTUS1,AGER,PLA2G7,TF,PLXNA3,PLXNA4,PRKCA,PRKD1,PRKD2,HRG,JAM3,CREB3,EDNRA,TIRAP,WNT5A,GAS6,USP14,TGFB1,BMPR2,SEMA3F,SEMA3A,IL23A,S1PR1,ADAM10,ADAM17,NTRK3,ARTN,ITGA2,SCG2,PTK2B,MEGF8,EDN3,EDN1,VEGFB,VEGFD,VEGFA,PDGFB,WNT3,GREM1,NOD2,CCL21,CCL19,EFNB2,PDGFRA,PDGFRB,SERPINE1,RAC2,RAC1,ROBO1,ROBO2,CMKLR1,HSPB1,NOTCH1,THBS1,THBS4,…	-0.725247	0.00288456	0.0476835
viral life cycle(GO:0019058)	338	873	71	16378	0.43	267	41704	0.64	RPLP0,WWP2,WWP1,APOBEC3H,APOBEC3C,PPIA,NELFE,RPL18,RPL19,RPL12,RPL35,RPL36,RPL39,RPL32,RPL34,RPL26,RPL23,RPL21,KPNA3,KPNA1,VPS4A,USF1,PLS1,RPSA,RPS6,RPS5,RPL7,RPL6,RPL3,RPS2,CCNT1,TM9SF1,TAF11,GTF2H4,SRPK1,DDX39B,LRSAM1,RAN,RPS10,RPS29,RPS20,RPS23,TSG101,THOC7,THOC1,TRIM13,TRIM28,TRIM26,RPS27A,RPL35A,SMARCA4,TRIM35,TRIM31,SP100,NUP153,TCEB1,DICER1,CDK9,HTATSF1,POLR2H,POLR2G,POLR2F,RPL27A,ILF3,DER…	RPLP2,RPLP0,RPLP1,ATG5,ATG7,IFITM1,IFITM2,IFITM3,HDAC1,ADARB1,USP6NL,WWP2,WWP1,SUPT16H,APOBEC3H,APOBEC3C,PPIH,PPIA,PPID,NELFA,NELFB,NELFE,TNIP1,RPL18,RPL17,RPL19,RPL14,RPL15,RPL10,RPL11,RPL12,RPL3L,RPL35,RPL36,RPL37,RPL39,RPL30,RPL32,RPL31,RPL34,RPL26,RPL27,RPL24,RPL28,RPL29,RPL23,RPL22,RPL21,MAVS,ACE2,VAPB,YTHDC2,ADAR,TFAP4,KPNB1,KPNA3,KPNA1,NFIA,HYAL2,PABPN1,VAMP8,PDCD6IP,IFI16,SNX3,SNW1,HPN,CD…	-0.389911	0.0029265	0.0477573
response to oxidative stress(GO:0006979)	339	745	71	16378	0.43	268	41703	0.64	LRRK2,PAX2,MSRB2,FBLN5,FOS,PTPRK,SNCA,SCARA3,CYGB,NR4A2,HP,FKBP1B,CHUK,PRKD1,PRNP,PLA2R1,MSRA,NDUFA12,JAK2,TMEM161A,ABCC2,RBM11,VNN1,FBXW7,CA3,FOXO1,MPV17,TAT,AQP1,GAB1,PNPT1,GLRX2,VKORC1L1,MAPK8,MAPK7,ARG1,ABL1,NME5,HNF1A,PTK2B,STK24,TPM1,HIF1A,SDC1,OXSR1,PTGS1,CCL19,GPR37,PRDX6,OXR1,PXN,BMP7,DHCR24,ETS1,GPX2,GPX7,ZNF622,NDUFS2,BAG5,UBQLN1,NDUFB4,AIF1,EZH2,AXL,HSPA1L,SLC23A2,EPAS1,RHOB,BNIP3,CAS…	PARP1,ATRN,NET1,LRRK2,HDAC6,PAX2,VRK2,CPEB2,FXN,MSRB1,MSRB2,MSRB3,FBLN5,SLC25A24,PPIF,PLEKHA1,FOS,XPA,MDM2,PARK7,PTPRK,PTPRN,PRODH,HGF,SRXN1,ANGPTL7,DUOX2,DUOX1,HBB,SNCA,NFKB1,ARNTL,WRN,SCARA3,GSS,KPNA4,MELK,HYAL1,HYAL2,CYGB,MB,PRKRA,NR4A2,HP,OLR1,MTF1,KLF4,G6PD,FKBP1B,SOD1,SOD3,SOD2,CHUK,PRKCD,PRKD1,PRNP,MBL2,PLA2R1,MSRA,NDUFA12,PPP2CB,ROMO1,NEIL1,HMOX1,CHD6,PSAP,JAK2,TMEM161A,ABCC2,RBM11,MCL1,P…	-0.393673	0.00293687	0.0477573
cellular response to external stimulus(GO:0071496)	273	514	55	16394	0.33	218	41753	0.52	HIGD1A,BCL10,PAX2,GCK,NR1H4,LARP1,FOS,LZTS1,NR4A2,ATG2B,PICK1,CADPS2,IRF1,USF1,SNAP29,ADORA2B,BMPR2,DMC1,FOXO1,AQP1,TM9SF1,GLRX2,MAPK8,IFT88,RNF5,ASNS,ENG,CDKN2B,RRP8,SREBF1,CTNNB1,MYD88,PPARG,HSPA5,CHEK1,AIF1,TRIM13,AXL,GSK3B,IL15,CD40,GJA1,NCOA1,ATP1A1,EGR1,BNIP3,MAX,CASP8,RAB1A,CASR,PMAIP1,ULK1,ULK2,CHMP1A,CHMP4A	HIGD1A,NUAK2,ATG5,ATG7,BCL10,FADD,ATG3,HDAC6,PAX2,GCK,NR1H4,CPEB4,LARP1,FOS,MDM2,HFE,ATG9B,ATG9A,ATG4C,ATG4B,NFKB1,MED1,NRBP2,WRN,LZTS1,VAMP8,NR4A2,IFI16,CYBA,ATG2B,ATG2A,ATG12,ATG14,ATG13,CYP27B1,PICK1,SNW1,CADPS2,MTOR,IRF1,KCNJ2,HMOX1,EMC6,RNASE4,EDNRA,SOX9,ATG16L1,WNT2B,USF1,FNIP1,USF2,GAS6,FOXA3,SNAP29,ADORA2B,BMPR2,DMC1,MAP3K14,SNAI2,MYOD1,FOXO1,MYOCD,TNC,DAP,AQP1,IFT20,SQSTM1,ANKRD1,TBC1D14…	-0.442306	0.00292544	0.0477573
ameboidal-type cell migration(GO:0001667)	261	547	52	16397	0.32	209	41762	0.5	SGPL1,ITGB1BP1,SH3BGRL3,NR2F2,ILK,PLXND1,PRKCE,PRKD1,SYNE2,EDNRB,CSNK2B,TGFB2,BMPR2,PKN3,BMPER,BMP10,TEK,AQP1,MARVELD3,GDF2,LTB4R2,FAP,DPP4,PTK2B,LOXL2,ACVR1,EVL,ACVR1C,AMOT,HIF1A,PDGFB,MMP9,KITLG,WDPCP,CENPV,ETS1,PPARD,ROBO1,ERBB4,HAND2,ALOX12,PTK2,RGCC,CXCR4,SP100,SLIT2,EPB41L5,MCC,ZEB2,ANGPT1,DAB2IP,RFFL	AMOTL1,NR2E1,HDAC5,HDAC9,HDAC7,HDAC6,PAX6,PAX3,SGPL1,SASH1,PDPK1,EMP2,ITGB1BP1,PBLD,PTPRM,PTPRG,PTPRR,ARHGEF7,PIP5K1A,PPM1F,SH3BGRL3,NR2F2,SCARB1,ILK,HYAL1,HYAL2,CXCL12,CIB1,PRCP,NR4A1,ID1,EPHB4,EPHA2,KLF4,PLXND1,PRKCA,PRKCE,PRKD1,PRKD2,HRG,SYNE2,DLL4,PITX2,EDNRB,TBX1,WNT5A,SOX9,SOX8,CSNK2B,TGFB1,TGFB2,BMPR2,PKN3,PKN2,PKN1,APOE,APOH,SEMA3F,SEMA3C,SEMA3A,SEMA4A,BMPER,TGFBR1,TGFBR2,TGFBR3,BMP10,TEK…	-0.456202	0.00292954	0.0477573
negative regulation of neuron death(GO:1901215)	153	273	27	16422	0.16	126	41845	0.3	FYN,CNTFR,SNCA,ILK,NR4A2,XRCC4,XRCC2,JAK2,MSH2,GRIK2,TGFB3,SET,TM9SF1,TP73,TFAP2A,PTK2B,LGMN,HIF1A,STXBP1,CTNNB1,OXR1,ROCK1,AXL,GABRB2,ITSN1,ANGPT1,CHMP4A	BARHL1,ADNP,C5AR1,CPEB4,FYN,STAMBP,PARK7,PPT1,CNTFR,SNCA,BDNF,WFS1,NRBP2,GPI,ILK,NR4A2,CHL1,SOD1,SOD2,HTT,SORL1,PRKCI,PRKCG,FAIM2,XRCC4,XRCC2,UNC5B,HMOX1,JAK2,BTG2,MSH2,MEF2C,GRIK2,TGFB3,GRIN1,PM20D1,APOE,CLCF1,SET,TM9SF1,MECP2,LIG4,TOX3,TP73,TFAP2B,TFAP2A,GDF5,NTRK2,CORO1A,CLN3,PTK2B,GFRAL,STAR,HTRA2,AARS,LGMN,GCLC,GCLM,F2R,CNTF,HIF1A,UBE2V2,ATP7A,STXBP1,VEGFB,KRAS,CTNNB1,TYRO3,TRAF2,SYNGAP1,PRD…	-0.605095	0.00293299	0.0477573
regulation of G-protein coupled receptor protein signaling pathway(GO:0008277)	136	450	23	16426	0.14	113	41858	0.27	LRRK2,CAMK2B,SNCA,PRKCQ,FNTB,PLEK,KCTD8,AKAP10,CALM1,RAMP3,GPSM3,HTR1B,RGS18,RGS1,RGS2,RGS6,RGS7,BICD1,GIT2,GIT1,PDCL,PDE4D,TULP3	MGRN1,ARHGEF12,ARHGEF11,LRRK2,CAMK2B,ARHGEF1,SNCA,PALM,AXIN2,AXIN1,F2,C3,KLK6,FKBP15,PRKCA,PRKCQ,DTNBP1,MYO18A,ADCYAP1,ADRB2,RASGRP4,RACGAP1,USP20,USP33,FNTB,FNTA,ARRB2,ARRB1,PLD2,PLEK,KCTD8,SYP,AKAP10,TMOD2,CALM1,RPGRIP1L,RAMP1,RAMP3,RAMP2,MYH9,PPEF1,GPSM3,GPSM1,GPSM2,GRK6,GRK7,GRK4,GRK5,GRM5,ITGB1,HTR1B,GTF2H2,HTR2B,PLCE1,MGLL,PLCB1,DYNLT1,RGS10,RGS11,RGS12,RGS19,RGS18,RGS17,RGS16,RGS14,RGS20,A…	-0.656476	0.00294878	0.0478308
positive regulation of cell differentiation(GO:0045597)	618	1375	141	16308	0.86	477	41494	1.14	HDAC2,PAX2,ZFHX3,NEO1,FOS,BMPR1B,MAPT,CYR61,SOCS5,PTPRD,AGTR1,ILK,IL7,ID2,KLF5,PRKCH,PRKD1,XRCC5,XRCC4,XRCC2,MSR1,ZBTB1,JAK2,TBX5,ELL3,CD276,SETD3,VNN1,TGFB3,TGFB2,IL15RA,BMPR2,FOXA1,CA2,APOB,HIF1AN,FOXJ1,IL2RA,TESPA1,RCOR1,TRPV2,SPDEF,ATRAID,RAPGEF2,ACTR3,SFN,CAPRIN2,OCSTAMP,HOXA5,CTHRC1,MYF6,TP73,ABL1,GDF2,MEDAG,LIN28A,NME2,DCSTAMP,LOXL2,ACVR1,VHL,NKX2-2,C10orf54,ACVR2A,ACVR2B,SMAP1,IGF1,CDKN2B…	SART1,ZAP70,GFAP,NET1,FADD,IFITM1,ARHGDIA,HDAC2,PAX6,PAX2,PAX8,FRZB,IL6ST,NELL1,ANAPC2,PIAS1,MAML1,ZFHX3,SASH3,NEO1,FN1,TESC,FOS,GFI1,BMPR1B,BMPR1A,HMG20B,ADAMTS9,HGF,HLX,MAPT,ARHGEF7,NRCAM,TWF2,BDNF,NFKB1,CYR61,AP3B1,MED1,FNDC5,AP3D1,NEUROD2,NEUROD1,ITPKB,DSCAM,SOCS5,ARNTL,AXIN2,MEN1,CYP26B1,PTPRC,PTPRD,AGTR1,ILK,OPRM1,SH3PXD2B,PKDCC,IL12A,WNT9A,IL7,LMO3,CXCL12,CIB1,BEND6,TNFSF9,ID2,EPHB2,KLF5,E…	-0.284864	0.00296693	0.0480049
regulation of cell projection organization(GO:0031344)	415	784	90	16359	0.55	325	41646	0.77	LRRK2,HDAC2,FYN,CFL2,CAMK2B,MAPT,ADCY6,PTPRD,ILK,LZTS1,XK,EPHB3,KLF5,FKBP1B,CHN1,PRKD1,BBS4,TENM3,ATP8A2,SNAP25,TGFB3,IL15RA,BMPR2,MYO10,ERMN,WASL,TNR,TRPV2,TRPV4,TBC1D7,DCC,PDLIM5,AQP1,RAPGEF2,LGALS1,ACTR3,CAPRIN2,IFT88,FKBP4,RNF6,SSH2,NME2,SPG20,PTK2B,STK24,WASF2,EVL,SPOCK1,PRKCSH,PACSIN1,COBL,TMEM30A,CCL21,CCL19,LIMK1,KIDINS220,WDPCP,SMAD1,BMP7,BMP5,RALA,NPTN,ROBO1,ROBO2,GPRC5B,RTN4,FEZ1,KIF13…	BARHL2,SCN1B,GFAP,KNDC1,NR2E1,ATG5,NET1,LRRK2,ATF1,ARHGDIA,ATG3,SARM1,HDAC2,PAX6,FAM110C,ANAPC2,CPEB3,FYN,FN1,CBFA2T2,CFL2,CAMK1D,CAMK2B,GFI1,NEFM,PTPRG,PTPRO,HGF,MAPT,ARHGEF1,ARHGEF7,NRCAM,TWF2,ACHE,ADCY6,BDNF,PALM,NR2F1,MIEN1,DSCAM,PAK3,SCARF1,PTPRD,ILK,LZTS1,ACSL6,CXCL12,CIB1,STMN2,AVIL,KLK6,KLK8,XK,EPHB3,EPHB2,KLF5,EPHA2,EPHA3,EPHA4,FKBP1B,CHN1,PLXNA3,PLXNA4,PLXNB1,PLXNB2,PLXNB3,MTOR,PRKCI,PR…	-0.349588	0.00305299	0.0492742
activation of immune response(GO:0002253)	431	1227	94	16355	0.57	337	41634	0.8	CACNB3,CACNB4,BCL10,ATF2,PAWR,FYN,FOS,PTPRJ,FCER1G,ITPR2,ELF1,C2,MAPKAPK2,PLA2G6,CYFIP2,CHUK,PRKCH,PRKCE,PRKCQ,PRNP,YES1,IRF1,ITK,C4A,NFKBIA,ELMO2,ELMO1,MARCO,MYO1G,MYO10,WASL,BLK,KCTD7,TESPA1,PLS1,TEC,TAB1,CFH,CFB,ACTR3,ACTR2,RNF31,CLU,CR2,CRK,MAPK8,MAPK7,ABL1,LY96,WASF2,LGMN,UBE2V1,PELI2,PELI1,FCGR3A,RC3H1,UBE2D3,UBE2D2,NOD1,RPS6KA1,RPS6KA2,LIMK1,HSP90AA1,C4BPB,C4BPA,MYD88,COLEC12,HLA-DRB3,HLA-…	CACNB3,CACNB4,ZAP70,TICAM1,TICAM2,ENAH,NLRC4,BCL10,FADD,ATF1,ATF2,SARM1,PAWR,SLA2,C5AR1,NR1H3,PDPK1,NR1D1,FYB,FYN,PHPT1,PLEKHA1,FOS,TNIP2,TNIP1,GFI1,PTPRJ,NLRX1,PGLYRP2,MAVS,TLR10,VAV3,VAV2,VAV1,VASP,SH2B2,HCK,THEMIS2,FCER1G,NFKB1,NFKB2,ITPR3,ITPR1,ITPR2,KLHL6,PAG1,PTPN6,PTPN2,PAK2,PAK1,PTPRC,ELF1,CNPY3,C7,C9,C3,C6,C5,C2,MAPKAPK3,MAPKAPK2,IFI16,MB21D1,PLA2G6,BIRC3,BIRC2,IRAK4,IRAK3,CYFIP2,CHUK,IR…	-0.342405	0.00306718	0.0492884
regulation of cell cycle phase transition(GO:1901987)	301	771	62	16387	0.38	239	41732	0.57	ATF2,ANAPC1,ANAPC4,NEK6,MDC1,XPC,CAMK2D,NEK10,ID2,TRIAP1,MBD4,XRCC3,CDC73,CDC23,RBM38,PSMA2,PSMA6,PSMA3,PSMA7,PSMB7,PSMC6,PSMD2,PSMD7,PSME1,PSME2,PSME4,MSH2,VPS4A,FBXW7,BID,CCNA1,RPS6,TP73,IER3,KANK2,CDKN2A,CDKN2B,CDKN1B,HUS1,ZNF830,FHL1,RFWD2,ANAPC10,CENPE,LSM11,CHEK1,PSMB10,AIF1,ATM,EZH2,RPS27L,RPS27A,RNASEH2B,SMARCA4,RGCC,CDK10,APC,PSMD14,CUL3,PDPN,NAE1,CTDSPL	ATF2,PRMT2,CUL4A,CUL4B,ANAPC1,ANAPC2,ANAPC5,ANAPC4,ANAPC7,NEK6,MDC1,ZW10,XPC,MDM2,CAMK2D,MEPCE,SMC5,PTPN6,BUB1B,PCID2,ZWINT,WNT9A,KNTC1,PRCC,MUC1,PLRG1,NEK10,NEK11,ID2,TRIAP1,MTBP,NSMCE2,MBD4,KLHL22,UBE2C,PRKDC,XRCC3,TCF3,BUB1,BUB3,MTA3,KCNA5,DLG1,CDC5L,CHFR,CDC73,CDC16,CDC23,CDC20,CDC26,CDC27,RBM38,PSMA2,PSMA1,PSMA6,PSMA5,PSMA4,PSMA3,PSMA7,PSMB5,PSMB4,PSMB7,PSMB6,PSMB1,PSMB2,PSMB8,PSMC6,PSMC5,PS…	-0.414549	0.0030691	0.0492884
ERBB signaling pathway(GO:0038127)	251	621	50	16399	0.3	201	41770	0.48	FRS2,AP2M1,FYN,PTPRJ,ADCY3,ADCY4,ADCY1,ADCY2,ADCY6,ITPR2,SOCS5,SNX6,CHUK,PRKCE,EREG,FBXW7,PHLPP2,FOXO1,EFEMP1,GAB1,ADAM17,CALM1,TFAP2A,ABL1,MVB12B,PTK2B,LGMN,CDKN1B,PDGFB,KITLG,PXN,FASLG,MAPKAP1,FGF9,SPRY2,RAF1,AFAP1L2,TNRC6C,ERBB4,RASSF2,KIF16B,GSK3B,RPS27A,NRG2,AGO2,FGF20,PIK3CB,STAM2,PDE1C,DAB2IP	AP2S1,ERRFI1,FRS2,AP2M1,PDPK1,AP2A2,AP2A1,FYN,MDM2,PTPRJ,PTPRR,HGS,ARHGEF7,VAV1,ADCY3,ADCY4,ADCY1,ADCY2,ADCY7,ADCY8,ADCY5,ADCY6,ITPR3,ITPR1,ITPR2,ADCY9,PAG1,SOCS4,SOCS5,PTPN2,NR4A1,SNX6,MTOR,CHUK,PRKCA,PRKCG,PRKCE,PRKCD,SOS1,PRKAR2B,PRKAR2A,IRS1,PRKAR1B,PRKAR1A,CDC42,CREB1,ADORA1,SH3KBP1,SOX9,BTC,EREG,TGFB1,MLST8,FBXW7,PHLPP1,PHLPP2,CBL,CAMK4,CAMLG,FOXO1,FOXO3,FOXO4,AKT1S1,EFEMP1,TSC2,GAB1,ADAM10…	-0.456324	0.00309188	0.0495312
lymphocyte differentiation(GO:0030098)	252	514	50	16399	0.3	202	41769	0.48	SOCS5,IL7,ID2,IRF1,XRCC4,ZBTB1,MERTK,CHD7,ITK,MSH2,VNN1,IL15RA,NDFIP1,FOXJ1,IL2RA,TESPA1,RPS6,LGALS1,ADAM17,CR2,SP3,ABL1,PTK2B,POLM,CDKN2A,GPR183,RC3H2,RC3H1,IFNW1,CTNNB1,IFNA5,CCL19,PPP2R3C,BLNK,NCOR1,ZNF683,BATF,JMJD6,ATM,AXL,IL15,IL10,APC,FLT3,RIPK3,EGR1,INHBA,ZEB1,GLI2,GLI3	SART1,ZAP70,FADD,HDAC5,HDAC4,HDAC9,SASH3,ZFP36L1,ZFP36L2,HLX,RPL22,PGLYRP2,TBX21,AP3B1,AP3D1,ITPKB,SATB1,SOCS5,PTPN6,PTPN2,PTPRC,PATZ1,IL12A,PPP3CB,IL7,TNFSF9,TNFSF8,ID2,TPD52,KLF6,FUT7,BCL3,BCL6,SOD1,ZC3H8,PRKCZ,PRKDC,GIMAP1,IRF1,IRF4,XRCC4,TCF3,ZBTB1,JAG2,HHEX,MERTK,CHD7,JAK3,SLC46A2,CYLD,ITK,MALT1,MSH2,RORC,RORA,BTK,VNN1,NFKBID,FNIP1,GAS6,SPI1,TXK,TGFB1,IL15RA,IL12RB1,CD2,CD4,CEBPG,CAMK4,FBXO7…	-0.461311	0.0031064	0.049641
regulation of system process(GO:0044057)	386	806	83	16366	0.5	303	41668	0.72	NEU1,ADRA1B,ADRA1A,SCN5A,FTO,CAMK2D,CAMK2B,AGTR1,CYP2J2,BDKRB2,PLA2G6,FKBP1B,MSTN,SCN11A,JAK2,ABCG8,ABCG5,EDNRB,EPHX2,TGFB2,ADORA2B,BMPR2,TRDN,TNR,BMP10,APOA2,HEY2,AQP1,AKAP13,CALM1,SRI,RNF10,GRIN2A,POMC,WASF3,TPM1,EIF2AK3,IGF1,FBXO32,WNK1,PDGFB,SREBF1,RPS6KB1,GTF2I,CNN1,GSTO1,PPARD,GATA4,AKAP6,CMYA5,CPS1,AIF1,JUP,COL14A1,RGS2,ALOX12,GSK3B,IL10,GJA1,POPDC2,TRIM63,NCF1,GUCY1A3,EPAS1,LMCD1,DICER1,A…	SCN3B,SCN2B,SCN1B,CFTR,NEU1,HDAC4,ADRA1B,TBXA2R,ADRA1A,ADRA1D,GAA,SCN5A,SCN4B,SCPEP1,IL6ST,NR1H2,NR1H3,FTO,AVPR2,PARD3,EMP2,SPTBN4,CAMK2G,CAMK2D,CAMK2B,PTPRM,PTPRO,HGF,ACE2,HCAR2,NEUROD1,GLS,BVES,AGTR1,MYLK2,OPRM1,CYP2J2,PPP3CA,KLK8,CYBA,PRKG1,MTG1,BDKRB2,GHSR,KLF4,PLA2G6,TH,FKBP1B,SOD1,MTPN,PRKCA,KCNJ2,ADCYAP1,MSTN,SCN11A,KCNH2,KCNE1,KCNE2,KCNA5,CORIN,HMOX1,ADRB2,IRX5,JAK2,ADORA3,ADORA1,ABCG8,AB…	-0.360365	0.00312244	0.0497744

## Sheet: Sheet2
GO term	GO number	pvalue	adj_pvalue
leukocyte activation	GO:0045321	7.79371e-08	0.000143988
negative regulation of cellular protein metabolic process	GO:0032269	9.48363e-08	0.000143988
coagulation	GO:0050817	1.17366e-07	0.000143988
hemostasis	GO:0007599	9.39355e-08	0.000143988
blood coagulation	GO:0007596	1.33487e-07	0.000143988
regulation of response to external stimulus	GO:0032101	3.18012e-08	0.000143988
sulfur compound metabolic process	GO:0006790	1.84197e-07	0.000170303
regulation of nucleoside metabolic process	GO:0009118	3.46593e-07	0.000280394
small molecule biosynthetic process	GO:0044283	4.07882e-07	0.000293312
regulation of locomotion	GO:0040012	7.12799e-07	0.000329842
regulation of purine nucleotide catabolic process	GO:0033121	5.91826e-07	0.000329842
regulation of nucleotide catabolic process	GO:0030811	5.96544e-07	0.000329842
regulation of MAPK cascade	GO:0043408	6.29128e-07	0.000329842
leukocyte migration	GO:0050900	7.13503e-07	0.000329842
ion homeostasis	GO:0050801	8.28115e-07	0.000357304
dephosphorylation	GO:0016311	1.02828e-06	0.000381951
regulation of hormone levels	GO:0010817	1.03179e-06	0.000381951
steroid metabolic process	GO:0008202	1.06229e-06	0.000381951
negative regulation of protein modification process	GO:0031400	1.34774e-06	0.000459083
regulation of cell motility	GO:2000145	1.53789e-06	0.000467794
regulation of secretion	GO:0051046	1.48635e-06	0.000467794
Wnt signaling pathway	GO:0016055	1.59015e-06	0.000467794
muscle structure development	GO:0061061	1.74587e-06	0.000491272
regulation of cell migration	GO:0030334	2.01783e-06	0.00053995
inflammatory response	GO:0006954	2.08571e-06	0.00053995
positive regulation of transport	GO:0051050	2.25333e-06	0.000549066
actin filament-based process	GO:0030029	2.2906e-06	0.000549066
behavior	GO:0007610	2.46017e-06	0.000568651
response to external biotic stimulus	GO:0043207	2.70454e-06	0.00058346
response to other organism	GO:0051707	2.70454e-06	0.00058346
regulation of protein serine/threonine kinase activity	GO:0071900	4.10246e-06	0.000856488
G-protein coupled receptor signaling pathway	GO:0007186	5.39748e-06	0.000859328
embryo development ending in birth or egg hatching	GO:0009792	5.44383e-06	0.000859328
response to cytokine	GO:0034097	5.07272e-06	0.000859328
translation	GO:0006412	5.22277e-06	0.000859328
cation homeostasis	GO:0055080	4.76188e-06	0.000859328
lymphocyte activation	GO:0046649	4.75079e-06	0.000859328
negative regulation of cell differentiation	GO:0045596	4.98491e-06	0.000859328
negative regulation of intracellular signal transduction	GO:1902532	5.27573e-06	0.000859328
carboxylic acid biosynthetic process	GO:0046394	4.90804e-06	0.000859328
organic acid biosynthetic process	GO:0016053	4.90804e-06	0.000859328
regulation of defense response	GO:0031347	5.66709e-06	0.000865377
posttranscriptional regulation of gene expression	GO:0010608	5.74957e-06	0.000865377
monocarboxylic acid metabolic process	GO:0032787	6.79993e-06	0.00100021
actin cytoskeleton organization	GO:0030036	7.42567e-06	0.00104476
hormone metabolic process	GO:0042445	7.41656e-06	0.00104476
negative regulation of transcription from RNA polymerase II promoter	GO:0000122	7.84822e-06	0.00107788
obsolete regulation of GTP catabolic process	GO:0033124	8.16072e-06	0.00107788
regulation of GTPase activity	GO:0043087	8.08998e-06	0.00107788
positive regulation of transferase activity	GO:0051347	8.33581e-06	0.00107899
chemotaxis	GO:0006935	9.41472e-06	0.00108807
taxis	GO:0042330	9.41472e-06	0.00108807
positive regulation of kinase activity	GO:0033674	8.69096e-06	0.00108807
negative regulation of phosphorus metabolic process	GO:0010563	9.27937e-06	0.00108807
negative regulation of phosphate metabolic process	GO:0045936	9.27937e-06	0.00108807
response to inorganic substance	GO:0010035	9.41341e-06	0.00108807
negative regulation of phosphorylation	GO:0042326	1.01046e-05	0.00114732
cellular response to cytokine stimulus	GO:0071345	1.03561e-05	0.0011556
response to radiation	GO:0009314	1.06497e-05	0.00116822
chordate embryonic development	GO:0043009	1.13831e-05	0.00122785
organelle assembly	GO:0070925	1.26503e-05	0.00134218
cytokine production	GO:0001816	1.31525e-05	0.00137295
cellular chemical homeostasis	GO:0055082	1.34473e-05	0.00138144
aminoglycan metabolic process	GO:0006022	1.48049e-05	0.00149715
regulation of cell adhesion	GO:0030155	1.58303e-05	0.00157621
regulation of small GTPase mediated signal transduction	GO:0051056	1.61426e-05	0.00158295
positive regulation of GTPase activity	GO:0043547	1.70254e-05	0.00164461
response to extracellular stimulus	GO:0009991	1.8311e-05	0.00171752
regulation of response to wounding	GO:1903034	1.82296e-05	0.00171752
regulation of cellular response to stress	GO:0080135	1.89325e-05	0.00175045
positive regulation of protein kinase activity	GO:0045860	1.98942e-05	0.00179519
protein processing	GO:0016485	1.99712e-05	0.00179519
sulfur compound biosynthetic process	GO:0044272	2.06067e-05	0.00182694
muscle organ development	GO:0007517	2.17081e-05	0.00189858
microtubule-based process	GO:0007017	2.24674e-05	0.00192709
organic hydroxy compound metabolic process	GO:1901615	2.26296e-05	0.00192709
response to bacterium	GO:0009617	2.43718e-05	0.0020485
vasculature development	GO:0001944	2.6528e-05	0.00220114
signal release	GO:0023061	2.76886e-05	0.00226836
regulation of protein localization	GO:0032880	2.8642e-05	0.00231713
metal ion homeostasis	GO:0055065	3.10244e-05	0.00247888
cellular response to nitrogen compound	GO:1901699	3.25967e-05	0.00252308
regulation of proteolysis	GO:0030162	3.22099e-05	0.00252308
generation of precursor metabolites and energy	GO:0006091	3.2747e-05	0.00252308
organophosphate biosynthetic process	GO:0090407	3.4001e-05	0.00257658
positive regulation of apoptotic process	GO:0043065	3.43965e-05	0.00257658
histone modification	GO:0016570	3.46357e-05	0.00257658
response to nutrient levels	GO:0031667	3.58689e-05	0.00263799
covalent chromatin modification	GO:0016569	3.76077e-05	0.0027348
anion transport	GO:0006820	3.87279e-05	0.00275254
regulation of establishment of protein localization	GO:0070201	3.91276e-05	0.00275254
peptidyl-tyrosine phosphorylation	GO:0018108	3.84544e-05	0.00275254
positive regulation of programmed cell death	GO:0043068	4.01884e-05	0.00279677
blood vessel development	GO:0001568	4.07214e-05	0.00280371
immune effector process	GO:0002252	4.12399e-05	0.00280952
protein maturation	GO:0051604	4.34831e-05	0.00293149
regulation of inflammatory response	GO:0050727	4.49377e-05	0.00299831
glycerolipid metabolic process	GO:0046486	4.59058e-05	0.00303166
proteolysis involved in cellular protein catabolic process	GO:0051603	4.91073e-05	0.00316772
glycoprotein metabolic process	GO:0009100	5.01823e-05	0.00316772
leukocyte differentiation	GO:0002521	4.85764e-05	0.00316772
negative regulation of kinase activity	GO:0033673	5.04133e-05	0.00316772
glycosaminoglycan metabolic process	GO:0030203	4.97392e-05	0.00316772
nucleoside monophosphate metabolic process	GO:0009123	5.35729e-05	0.00327353
alcohol metabolic process	GO:0006066	5.27411e-05	0.00327353
Ras protein signal transduction	GO:0007265	5.39385e-05	0.00327353
peptidyl-tyrosine modification	GO:0018212	5.41205e-05	0.00327353
chromatin modification	GO:0016568	5.63391e-05	0.00337618
negative regulation of transport	GO:0051051	5.90202e-05	0.00348887
steroid biosynthetic process	GO:0006694	5.92978e-05	0.00348887
regulation of ion transport	GO:0043269	6.02209e-05	0.00351126
positive regulation of response to external stimulus	GO:0032103	6.11479e-05	0.00353347
monocarboxylic acid biosynthetic process	GO:0072330	6.27579e-05	0.00359442
cation transmembrane transport	GO:0098655	6.36083e-05	0.00361116
cellular protein catabolic process	GO:0044257	6.45978e-05	0.00363545
purine nucleoside monophosphate metabolic process	GO:0009126	6.54875e-05	0.00365375
positive regulation of cell death	GO:0010942	6.72993e-05	0.00372274
regulation of Ras protein signal transduction	GO:0046578	7.15326e-05	0.0038853
regulation of cell activation	GO:0050865	7.2039e-05	0.0038853
regulation of leukocyte activation	GO:0002694	7.08637e-05	0.0038853
cellular cation homeostasis	GO:0030003	7.49911e-05	0.0040111
cellular response to organonitrogen compound	GO:0071417	7.69758e-05	0.00403505
regulation of protein transport	GO:0051223	7.72345e-05	0.00403505
defense response to other organism	GO:0098542	7.73094e-05	0.00403505
purine ribonucleoside monophosphate metabolic process	GO:0009167	7.83685e-05	0.00405761
myeloid leukocyte activation	GO:0002274	7.9073e-05	0.00406159
ribonucleoside monophosphate metabolic process	GO:0009161	8.12711e-05	0.00414163
T cell activation	GO:0042110	8.71504e-05	0.00440654
inorganic ion transmembrane transport	GO:0098660	8.98665e-05	0.00444441
cellular response to hormone stimulus	GO:0032870	9.04069e-05	0.00444441
negative regulation of protein phosphorylation	GO:0001933	8.91589e-05	0.00444441
hexose metabolic process	GO:0019318	9.06463e-05	0.00444441
cytokine-mediated signaling pathway	GO:0019221	9.46083e-05	0.0046038
gland development	GO:0048732	9.71997e-05	0.0046946
cellular ion homeostasis	GO:0006873	9.81318e-05	0.00470451
modification-dependent protein catabolic process	GO:0019941	0.000103278	0.00491481
regulation of cytokine production	GO:0001817	0.000105061	0.00496318
multicellular organismal homeostasis	GO:0048871	0.000107634	0.00504787
modification-dependent macromolecule catabolic process	GO:0043632	0.000109196	0.0050843
regulation of nervous system development	GO:0051960	0.000114826	0.00530824
regulation of intracellular transport	GO:0032386	0.000116635	0.00535361
platelet activation	GO:0030168	0.000117477	0.00535432
response to peptide	GO:1901652	0.000118524	0.00536426
positive regulation of cellular component movement	GO:0051272	0.000119626	0.00537651
muscle tissue development	GO:0060537	0.000121635	0.00539195
protein dephosphorylation	GO:0006470	0.000120989	0.00539195
blood vessel morphogenesis	GO:0048514	0.000124655	0.00547455
negative regulation of protein kinase activity	GO:0006469	0.000125191	0.00547455
positive regulation of locomotion	GO:0040017	0.000126485	0.00549405
tissue morphogenesis	GO:0048729	0.000127367	0.00549545
activation of protein kinase activity	GO:0032147	0.000129868	0.00552963
cell chemotaxis	GO:0060326	0.000129042	0.00552963
endomembrane system organization	GO:0010256	0.000143746	0.00608055
striated muscle tissue development	GO:0014706	0.000144741	0.00608289
response to xenobiotic stimulus	GO:0009410	0.00014643	0.00611417
stress-activated protein kinase signaling cascade	GO:0031098	0.000148851	0.0061754
divalent inorganic cation homeostasis	GO:0072507	0.000151307	0.00623731
regulation of cell cycle process	GO:0010564	0.000155784	0.00638123
cellular response to xenobiotic stimulus	GO:0071466	0.000161304	0.00652475
xenobiotic metabolic process	GO:0006805	0.000161304	0.00652475
regulation of lipid metabolic process	GO:0019216	0.000166336	0.00668648
positive regulation of cell motility	GO:2000147	0.000169473	0.00677054
negative regulation of multicellular organismal process	GO:0051241	0.000174174	0.00691567
regulation of translation	GO:0006417	0.000178062	0.00702693
cellular amino acid metabolic process	GO:0006520	0.000182258	0.00714891
regulation of GTPase activity	GO:0032318	0.000187168	0.00729731
cell-type specific apoptotic process	GO:0097285	0.000195294	0.00747401
mitotic nuclear division	GO:0007067	0.000194593	0.00747401
negative regulation of transferase activity	GO:0051348	0.00019632	0.00747401
glucose metabolic process	GO:0006006	0.000194081	0.00747401
ubiquitin-dependent protein catabolic process	GO:0006511	0.000199657	0.00755659
positive regulation of organelle organization	GO:0010638	0.000213562	0.00803588
regulation of stress-activated MAPK cascade	GO:0032872	0.00022104	0.00822168
coenzyme biosynthetic process	GO:0009108	0.000220069	0.00822168
regulation of stress-activated protein kinase signaling cascade	GO:0070302	0.000224911	0.00831786
regulation of multi-organism process	GO:0043900	0.000229895	0.00845386
response to peptide hormone	GO:0043434	0.000236819	0.00865927
stress-activated MAPK cascade	GO:0051403	0.000241054	0.00876462
regulation of anatomical structure size	GO:0090066	0.000245053	0.0088024
single organism cell adhesion	GO:0098602	0.000247048	0.0088024
response to nutrient	GO:0007584	0.000247534	0.0088024
anion transmembrane transport	GO:0098656	0.000247534	0.0088024
negative regulation of cellular component organization	GO:0051129	0.000251224	0.00884799
skeletal system development	GO:0001501	0.00025155	0.00884799
regulation of growth	GO:0040008	0.00025531	0.0089317
ATP metabolic process	GO:0046034	0.000263572	0.00907361
microtubule cytoskeleton organization	GO:0000226	0.000263056	0.00907361
positive regulation of cell migration	GO:0030335	0.000261295	0.00907361
angiogenesis	GO:0001525	0.000266839	0.00913746
endocytosis	GO:0006897	0.000271339	0.00923399
nuclear transport	GO:0051169	0.000275409	0.00923399
energy derivation by oxidation of organic compounds	GO:0015980	0.000278218	0.00923399
phospholipid metabolic process	GO:0006644	0.000273872	0.00923399
regulation of protein processing	GO:0070613	0.000277188	0.00923399
regulation of protein maturation	GO:1903317	0.000277188	0.00923399
monosaccharide biosynthetic process	GO:0046364	0.000287943	0.009508
positive regulation of leukocyte activation	GO:0002696	0.000302708	0.00994479
cofactor metabolic process	GO:0051186	0.00031064	0.0101538
protein oligomerization	GO:0051259	0.00032154	0.0104573
monosaccharide metabolic process	GO:0005996	0.000325547	0.0105347
exocytosis	GO:0006887	0.000327752	0.0105533
regulation of neurogenesis	GO:0050767	0.000341858	0.010953
cellular response to peptide	GO:1901653	0.000345576	0.0110176
regulation of GTPase activity	GO:0032320	0.000352709	0.0111899
cell morphogenesis involved in neuron differentiation	GO:0048667	0.000362034	0.0114118
axonogenesis	GO:0007409	0.00036323	0.0114118
nuclear division	GO:0000280	0.000368014	0.0114811
regulation of MAP kinase activity	GO:0043405	0.000368986	0.0114811
methylation	GO:0032259	0.000371919	0.011517
ossification	GO:0001503	0.000379026	0.0116259
glycoprotein biosynthetic process	GO:0009101	0.000379026	0.0116259
regulation of cellular component biogenesis	GO:0044087	0.000386504	0.0117993
cellular metal ion homeostasis	GO:0006875	0.000390305	0.0118594
axon development	GO:0061564	0.000401627	0.0121464
single-organism cellular localization	GO:1902580	0.000406682	0.0121854
single-organism localization	GO:1902578	0.000406682	0.0121854
cellular response to peptide hormone stimulus	GO:0071375	0.000412937	0.0122593
negative regulation of hydrolase activity	GO:0051346	0.000412937	0.0122593
monovalent inorganic cation transport	GO:0015672	0.000425583	0.0125199
calcium ion homeostasis	GO:0055074	0.000424666	0.0125199
positive regulation of response to wounding	GO:1903036	0.00042803	0.0125349
neurotrophin TRK receptor signaling pathway	GO:0048011	0.000434286	0.012589
regulation of vesicle-mediated transport	GO:0060627	0.000435714	0.012589
coenzyme metabolic process	GO:0006732	0.000432717	0.012589
nucleocytoplasmic transport	GO:0006913	0.000459508	0.0131825
regulation of cell morphogenesis	GO:0022604	0.000460328	0.0131825
organelle fission	GO:0048285	0.000464432	0.0132414
in utero embryonic development	GO:0001701	0.00046825	0.0132917
brain development	GO:0007420	0.000471974	0.0133323
neurotrophin signaling pathway	GO:0038179	0.000473798	0.0133323
regulation of neurotransmitter levels	GO:0001505	0.000476779	0.0133581
rhythmic process	GO:0048511	0.000482643	0.0134641
regulation of symbiosis, encompassing mutualism through parasitism	GO:0043903	0.000493464	0.0137069
response to molecule of bacterial origin	GO:0002237	0.000513045	0.0141899
response to ionizing radiation	GO:0010212	0.00052279	0.0143979
organic anion transport	GO:0015711	0.000531011	0.0145623
response to insulin	GO:0032868	0.000542696	0.0147782
cellular component assembly involved in morphogenesis	GO:0010927	0.00054345	0.0147782
muscle cell differentiation	GO:0042692	0.000564823	0.015247
negative regulation of MAPK cascade	GO:0043409	0.000565403	0.015247
single-organism membrane fusion	GO:0044801	0.000571764	0.0153546
cell-substrate adhesion	GO:0031589	0.000606148	0.0161504
cellular hormone metabolic process	GO:0034754	0.00060639	0.0161504
neurotransmitter transport	GO:0006836	0.000626046	0.0166056
positive regulation of immune response	GO:0050778	0.000636292	0.0167402
inorganic cation transmembrane transport	GO:0098662	0.000636292	0.0167402
vesicle organization	GO:0016050	0.000643168	0.0168526
cellular ketone metabolic process	GO:0042180	0.000661459	0.0172533
JNK cascade	GO:0007254	0.000663795	0.0172533
cell growth	GO:0016049	0.000695019	0.0179927
membrane fusion	GO:0061025	0.000699019	0.0180241
cellular carbohydrate metabolic process	GO:0044262	0.000723378	0.0185782
negative regulation of cytokine production	GO:0001818	0.000747494	0.0191217
skeletal system morphogenesis	GO:0048705	0.000756315	0.0192711
chemokine production	GO:0032602	0.0007661	0.0194439
ribonucleoprotein complex biogenesis	GO:0022613	0.00077114	0.0194954
positive regulation of lymphocyte activation	GO:0051251	0.000775639	0.0195328
regulation of JNK cascade	GO:0046328	0.000785944	0.0197156
cellular divalent inorganic cation homeostasis	GO:0072503	0.00080227	0.0199703
hexose biosynthetic process	GO:0019319	0.000799298	0.0199703
regulation of lymphocyte activation	GO:0051249	0.000819136	0.0203121
protein secretion	GO:0009306	0.000830145	0.0205065
detection of stimulus	GO:0051606	0.000840962	0.0205447
organelle fusion	GO:0048284	0.000840001	0.0205447
gluconeogenesis	GO:0006094	0.000841214	0.0205447
regulation of mitotic cell cycle	GO:0007346	0.000872194	0.0209068
positive regulation of MAPK cascade	GO:0043410	0.000864055	0.0209068
positive regulation of defense response	GO:0031349	0.00086437	0.0209068
regulation of immune effector process	GO:0002697	0.000870061	0.0209068
positive regulation of inflammatory response	GO:0050729	0.00087128	0.0209068
protein localization to membrane	GO:0072657	0.000895597	0.0213886
positive regulation of protein serine/threonine kinase activity	GO:0071902	0.000906623	0.0215723
peptide metabolic process	GO:0006518	0.000925998	0.0218725
endocrine system development	GO:0035270	0.000925998	0.0218725
RNA splicing	GO:0008380	0.000934999	0.0219741
cellular calcium ion homeostasis	GO:0006874	0.000958655	0.0219741
positive regulation of cell activation	GO:0050867	0.000951032	0.0219741
negative regulation of peptidase activity	GO:0010466	0.00096086	0.0219741
skeletal muscle organ development	GO:0060538	0.000951975	0.0219741
skeletal muscle tissue development	GO:0007519	0.000956403	0.0219741
regulation of peptidyl-tyrosine phosphorylation	GO:0050730	0.000956977	0.0219741
developmental growth involved in morphogenesis	GO:0060560	0.000942562	0.0219741
defense response to bacterium	GO:0042742	0.000945278	0.0219741
mRNA processing	GO:0006397	0.000998885	0.0227633
extracellular matrix organization	GO:0030198	0.00101868	0.0231329
extracellular structure organization	GO:0043062	0.00102239	0.0231359
regulation of Wnt signaling pathway	GO:0030111	0.00103208	0.023274
single organismal cell-cell adhesion	GO:0016337	0.00106587	0.0237872
regulation of protein complex assembly	GO:0043254	0.00106556	0.0237872
neuron death	GO:0070997	0.00106556	0.0237872
cofactor biosynthetic process	GO:0051188	0.00107611	0.0239332
cellular amide metabolic process	GO:0043603	0.00108223	0.0239869
lipid localization	GO:0010876	0.0010896	0.0240679
tube development	GO:0035295	0.00111368	0.0245161
fatty acid biosynthetic process	GO:0006633	0.00111861	0.0245412
extrinsic apoptotic signaling pathway	GO:0097191	0.00112636	0.0246277
response to lipopolysaccharide	GO:0032496	0.00113117	0.0246497
sensory perception	GO:0007600	0.00115963	0.025185
regulation of protein modification by small protein conjugation or removal	GO:1903320	0.00117313	0.0253929
organelle localization	GO:0051640	0.00120503	0.0259966
regulation of cellular ketone metabolic process	GO:0010565	0.00121646	0.0261559
Golgi vesicle transport	GO:0048193	0.0012414	0.0266037
embryonic morphogenesis	GO:0048598	0.00126685	0.0270595
regulation of lipid biosynthetic process	GO:0046890	0.0012724	0.0270886
regulation of cell growth	GO:0001558	0.00128316	0.0272283
purine nucleoside monophosphate catabolic process	GO:0009128	0.00128743	0.0272295
cellular response to insulin stimulus	GO:0032869	0.00129274	0.0272528
immune response-regulating signaling pathway	GO:0002764	0.00131271	0.027584
response to metal ion	GO:0010038	0.00133734	0.0280106
myeloid cell differentiation	GO:0030099	0.00136033	0.0284001
regulation of viral process	GO:0050792	0.00137793	0.0285833
regulation of behavior	GO:0050795	0.00137793	0.0285833
plasma membrane organization	GO:0007009	0.00139102	0.0287193
positive regulation of growth	GO:0045927	0.00139337	0.0287193
cellular response to abiotic stimulus	GO:0071214	0.00139811	0.0287256
sexual reproduction	GO:0019953	0.00140355	0.0287461
cell cycle phase transition	GO:0044770	0.00142508	0.0290951
cellular response to lipid	GO:0071396	0.00143342	0.0291732
leukocyte chemotaxis	GO:0030595	0.00146345	0.0296911
glycerophospholipid metabolic process	GO:0006650	0.00148915	0.0301181
purine ribonucleoside monophosphate catabolic process	GO:0009169	0.00152079	0.0304724
ribonucleoside monophosphate catabolic process	GO:0009158	0.00152079	0.0304724
cell junction assembly	GO:0034329	0.0015177	0.0304724
negative regulation of endopeptidase activity	GO:0010951	0.00154273	0.0308165
regulation of neuron differentiation	GO:0045664	0.0015478	0.0308226
cell junction organization	GO:0034330	0.00156725	0.0310191
striated muscle cell differentiation	GO:0051146	0.00156725	0.0310191
nucleoside monophosphate catabolic process	GO:0009125	0.00159369	0.0314463
proteasomal protein catabolic process	GO:0010498	0.00164411	0.0322024
lipid transport	GO:0006869	0.00164694	0.0322024
anatomical structure homeostasis	GO:0060249	0.00164694	0.0322024
monovalent inorganic cation homeostasis	GO:0055067	0.00169263	0.0329961
regulation of apoptotic signaling pathway	GO:2001233	0.00172505	0.0334267
cell cycle checkpoint	GO:0000075	0.00172377	0.0334267
mitotic cell cycle phase transition	GO:0044772	0.00178293	0.0342217
regulation of cellular component size	GO:0032535	0.00178723	0.0342217
glycerolipid biosynthetic process	GO:0045017	0.00178723	0.0342217
positive regulation of cell adhesion	GO:0045785	0.00177734	0.0342217
positive regulation of multicellular organismal process	GO:0051240	0.00179388	0.0342479
regulation of I-kappaB kinase/NF-kappaB signaling	GO:0043122	0.00182334	0.0347077
heart development	GO:0007507	0.00185938	0.0349823
intracellular receptor signaling pathway	GO:0030522	0.00185661	0.0349823
inositol lipid-mediated signaling	GO:0048017	0.00185378	0.0349823
phosphatidylinositol-mediated signaling	GO:0048015	0.00185378	0.0349823
single-organism behavior	GO:0044708	0.00188366	0.0353364
peptidyl-tyrosine dephosphorylation	GO:0035335	0.00188982	0.0353494
membrane lipid metabolic process	GO:0006643	0.00197135	0.0367683
tissue homeostasis	GO:0001894	0.0020153	0.0373726
phosphatidylinositol metabolic process	GO:0046488	0.0020153	0.0373726
JAK-STAT cascade	GO:0007259	0.00209631	0.0387637
obsolete ATP catabolic process	GO:0006200	0.00211772	0.0388993
proteasome-mediated ubiquitin-dependent protein catabolic process	GO:0043161	0.00212059	0.0388993
muscle contraction	GO:0006936	0.00212167	0.0388993
regulation of binding	GO:0051098	0.00214328	0.0391846
divalent inorganic cation transport	GO:0072511	0.00217849	0.0397159
cell projection assembly	GO:0030031	0.00223783	0.0406833
regulation of actin filament-based process	GO:0032970	0.00226481	0.0409438
microtubule-based movement	GO:0007018	0.00225851	0.0409438
circadian rhythm	GO:0007623	0.00228016	0.0411063
alcohol biosynthetic process	GO:0046165	0.00229525	0.0411248
positive regulation of immune effector process	GO:0002699	0.00229161	0.0411248
positive regulation of multi-organism process	GO:0043902	0.00230024	0.0411248
glutathione metabolic process	GO:0006749	0.00231176	0.0412168
regulation of T cell activation	GO:0050863	0.00233372	0.0413803
regulation of metal ion transport	GO:0010959	0.00233372	0.0413803
ncRNA metabolic process	GO:0034660	0.00234798	0.0415194
regulation of homeostatic process	GO:0032844	0.00249841	0.0440592
morphogenesis of an epithelium	GO:0002009	0.00251383	0.0440908
regulation of chemokine production	GO:0032642	0.00250857	0.0440908
protein targeting	GO:0006605	0.0025352	0.0441071
regulation of membrane potential	GO:0042391	0.00253347	0.0441071
post-embryonic development	GO:0009791	0.00253354	0.0441071
actin filament organization	GO:0007015	0.00256789	0.044262
cellular modified amino acid metabolic process	GO:0006575	0.00255209	0.044262
regulation of leukocyte migration	GO:0002685	0.00257146	0.044262
myeloid leukocyte migration	GO:0097529	0.00257146	0.044262
DNA repair	GO:0006281	0.00259428	0.0443012
divalent metal ion transport	GO:0070838	0.00259105	0.0443012
muscle system process	GO:0003012	0.0025898	0.0443012
positive regulation of B cell activation	GO:0050871	0.0026402	0.0449668
embryonic organ development	GO:0048568	0.00264778	0.0449775
negative regulation of cell proliferation	GO:0008285	0.00272157	0.0458784
regulation of peptidase activity	GO:0052547	0.00272287	0.0458784
regulation of cell morphogenesis involved in differentiation	GO:0010769	0.00273626	0.0458784
carboxylic acid transport	GO:0046942	0.00273626	0.0458784
cytokine secretion	GO:0050663	0.00270901	0.0458784
organic acid transport	GO:0015849	0.00276034	0.0461618
leukocyte mediated immunity	GO:0002443	0.00276743	0.0461618
T cell differentiation	GO:0030217	0.00281539	0.0468412
regulation of neuron death	GO:1901214	0.00285121	0.0473155
blood circulation	GO:0008015	0.00289549	0.0476835
myeloid leukocyte differentiation	GO:0002573	0.00289243	0.0476835
regulation of chemotaxis	GO:0050920	0.00288456	0.0476835
viral life cycle	GO:0019058	0.0029265	0.0477573
response to oxidative stress	GO:0006979	0.00293687	0.0477573
cellular response to external stimulus	GO:0071496	0.00292544	0.0477573
ameboidal-type cell migration	GO:0001667	0.00292954	0.0477573
negative regulation of neuron death	GO:1901215	0.00293299	0.0477573
regulation of G-protein coupled receptor protein signaling pathway	GO:0008277	0.00294878	0.0478308
positive regulation of cell differentiation	GO:0045597	0.00296693	0.0480049
regulation of cell projection organization	GO:0031344	0.00305299	0.0492742
activation of immune response	GO:0002253	0.00306718	0.0492884
regulation of cell cycle phase transition	GO:1901987	0.0030691	0.0492884
ERBB signaling pathway	GO:0038127	0.00309188	0.0495312
lymphocyte differentiation	GO:0030098	0.0031064	0.049641
regulation of system process	GO:0044057	0.00312244	0.0497744
